# Supplementary material
Source: PubMed Central journal article supplement (PMC4769604)

## Table of Contents

|                                                                                                                |          |
|----------------------------------------------------------------------------------------------------------------|----------|
| General Information                                                                                            | S2       |
| General Procedure for the synthesis of dihydropyridine intermediate & NMR data (6-12)                          | S2-S3    |
| General procedures for the synthesis of substituted pyridines, NMR & HPLC data (13-51)                         | S4-S12   |
| Procedure for trapping aldehyde with dihydropyridine intermediate synthesis of 52, 53, 54&NMR data             | S13-S14  |
| Reduction & oxidation of dihydropyridines, synthesis of compound 56-67& NMR data                               | S14-S18  |
| General procedure for SmI <sub>2</sub> mediated cyclization of dihydropyridine intermediate & NMR data (68-73) | S18-S21  |
| Procedure for functionalization of tricyclic tetrahydropyridineS& NMR Data (74-84)                             | S22-S26  |
| Radical cyclization of substituted pyridine <sup>1</sup> H NMR & <sup>13</sup> C NMR data for 88, 89           | S26-S27  |
| Computational calculation to determine the relative stereochemistry of 88 <i>anti/syn</i> &89 <i>anti/syn</i>  | S28-S40  |
| <sup>1</sup> H NMR, <sup>13</sup> C NMR spectra & chiral HPLC chromatograms                                    | S41-S137 |

**General Information:** Unless otherwise stated, reactions were performed under argon using freshly purified solvents which were purified using solvent purification columns purchased from Glass Contour, Laguna Beach, CA. All reactions were monitored by thin-layer chromatography with E. Merck silica gel 60 F254 pre-coated plates (0.25 mm). Flash chromatography was performed with indicated solvents using silica gel (particle size 0.032-0.063m) purchased from Sorbent Technologies. <sup>1</sup>H and <sup>13</sup>C NMR spectra were recorded on Varian MR or Inova 400 MHz spectrometer. Data for <sup>1</sup>H NMR are reported as follows: chemical shift (ppm), integration, multiplicity (s = singlet, d = doublet, t = triplet, q = quartet, p = pentet, dd = doublet of doublets, ddd = doublet of doublets of doublets and m = multiplet), and coupling constant (Hz). Mass spectra were acquired on an Agilent technologies 1200 series LC/MS using indicated ionization methods.

**Materials:** Chemicals were purchased from Aldrich, Fisher or Alfa Aesar and used without purification unless otherwise noted.

General Procedure for the synthesis of dihydropyridine intermediate

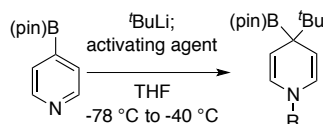

**(4-(tert-butyl)-4-(4,4,5,5-tetramethyl-1,3,2-dioxaborolan-2-yl)pyridin-1(4H)-yl)(phenyl)methanone:** To a stirred solution of 4-pyridineboronic acid pinacol ester (62 mg, 0.3 mmol, recrystallized from  $\text{CHCl}_3$  and hexanes) in dry THF (1.5 mL) at  $-78^\circ\text{C}$  was added  $t\text{BuLi}$  solution in pentane (193  $\mu\text{L}$ , 0.33 mmol, 1.7 M in pentane) under an argon atmosphere. The reaction was stirred at  $-78^\circ\text{C}$  for 30 min then rt for 15 min. The reaction mixture was degassed by three freeze-pump-thaw cycles, and then cooled to  $-78^\circ\text{C}$ . A degassed solution of the desired activating agent (0.36 mmol) in THF (0.5 mL) was added dropwise with constant stirring. The reaction was stirred at  $-78^\circ\text{C}$  for 30 min then warmed to  $-40^\circ\text{C}$  and stirred overnight (15h). Water was added and the reaction was warmed to rt. 10 mL of brine was added to the reaction mixture and the product was extracted with EtOAc ( $3 \times 10\text{mL}$ ). The organic layer was collected, dried over  $\text{Na}_2\text{SO}_4$  and then concentrated in vacuo. The crude product was purified by silica gel chromatography.

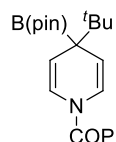

**4-(tert-butyl)-4-(4,4,5,5-tetramethyl-1,3,2-dioxaborolan-2-yl)pyridin-1(4H)-yl)(phenyl)methanone (6):** Synthesized using general procedure, purified by silica gel chromatography (10% EtOAc/hexane), white solid, yield 82%, mp  $143\text{--}144^\circ\text{C}$ ,  $^1\text{H}$  NMR (400 MHz,  $\text{CDCl}_3$ )  $\delta$  ppm 7.55 – 7.11 (m, 6H), 6.44 (s, 1H), 5.26 (s, 1H), 4.90 (s, 1H), 1.21 (s, 12H), 0.95 (s, 9H).  $^{13}\text{C}$  NMR (100 MHz,  $\text{CDCl}_3$ )  $\delta$  ppm 166.6, 134.3, 130.5, 128.3, 128.2, 124.7, 121.9, 113.5, 110.7, 83.5, 37.5, 37.4 (quaternary carbon attached to boron weak broad peak), 26.5, 24.7.  $^{11}\text{B}$  NMR (96 MHz,  $\text{CDCl}_3$ )  $\delta$  ppm 31.87. ESI MS  $m/z$ :  $[\text{M}+\text{H}]^+$  368.2.

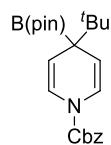

**4-(tert-butyl)-4-(4,4,5,5-tetramethyl-1,3,2-dioxaborolan-2-yl)pyridine-1(4H)-yl)benzyl carboxylate (7):** Synthesized using general procedure, purified by silica gel chromatography (10% EtOAc/hexane), white solid, yield 82%, mp  $145\text{--}147^\circ\text{C}$ ,  $^1\text{H}$  NMR (400 MHz,  $\text{CDCl}_3$ )  $\delta$  ppm 7.45 – 7.24 (m, 5H), 6.83 (dd,  $J = 8.7, 1.7$  Hz, 1H), 6.74 (dd,  $J = 8.6, 1.8$  Hz, 1H), 5.18 (app q,  $J = 12.2$  Hz, 2H), 5.03 (dd,  $J = 8.6, 2.5$  Hz, 1H), 4.92 (dd,  $J = 8.7, 2.5$  Hz, 1H), 1.22 (s, 12H), 0.92 (s, 10H).  $^{13}\text{C}$  NMR (100 MHz,  $\text{CDCl}_3$ )  $\delta$  ppm 151.2, 135.9, 128.5, 128.3, 128.1, 122.3, 121.9, 110.4, 109.9, 83.4, 67.7, 37.1, 36.1 (quaternary carbon attached to boron; weak broad peak), 26.5, 24.7.  $^{11}\text{B}$  NMR (96 MHz,  $\text{CDCl}_3$ )  $\delta$  ppm 32.27. ESI MS  $m/z$ :  $[\text{M}+\text{H}]^+$  398.2.

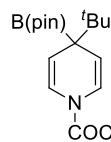

**1-(4-(tert-butyl)-4-(4,4,5,5-tetramethyl-1,3,2-dioxaborolan-2-yl)-3,4-dihydropyridin-1(2H)-yl)-2,2,2-trichloroethanone (8):** Synthesized using general procedure, purified by silica gel chromatography (10% EtOAc/hexane), yellow gum, yield 88%,  $^1\text{H}$  NMR (400 MHz,  $\text{CDCl}_3$ )  $\delta$  ppm 7.24 – 7.03 (m, 2H), 5.51 – 5.15 (m, 2H), 1.31 – 1.17 (m, 12H), 0.95 (s, 9H).  $^{13}\text{C}$  NMR (100 MHz,  $\text{CDCl}_3$ )  $\delta$  ppm 155.5, 123.5, 122.9, 116.7, 113.4, 92.4, 83.8, 37.6, 30.3, 26.6, 24.7.  $^{11}\text{B}$  NMR (96 MHz,  $\text{CDCl}_3$ ) 31.52  $\delta$  ppm. ESI MS  $m/z$ :  $[\text{M}+\text{H}]^+$  408.2.

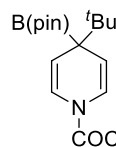

**1-(4-(tert-butyl)-4-(4,4,5,5-tetramethyl-1,3,2-dioxaborolan-2-yl)pyridin-1(4H)-yl)-2,2,2-trifluoroethanone (9):** Synthesized using general procedure, purified by silica gel chromatography (10% EtOAc/hexane), white solid, yield 84%, mp  $115\text{--}116^\circ\text{C}$ ,  $^1\text{H}$  NMR (400 MHz, Acetone- $d_6$ )  $\delta$  ppm 7.03 (dd,  $J = 8.5, 1.8$  Hz, 1H), 6.76 (dt,  $J = 8.4, 2.3$  Hz, 1H), 5.51 (dd,  $J = 8.5, 2.5$  Hz, 1H), 5.34 (dd,  $J = 8.5, 2.5$  Hz, 1H), 1.24 (s, 13H), 0.97 (s, 9H).  $^{13}\text{C}$  NMR (101 MHz, Acetone- $d_6$ )  $\delta$  ppm 151.31 (q,  $J = 37.60$  Hz,  $\text{COCF}_3$ ), 120.4, 120.2, 117.4, 116.3 (q,  $J = 291.46$ ,  $\text{CF}_3$ ), 115.2, 83.8, 37.0, 25.9, 24.1, (quaternary carbon attached to boron not observed).  $^{11}\text{B}$  NMR (96 MHz, Acetone- $d_6$ )  $\delta$  ppm 31.69. ESI MS  $m/z$ :  $[\text{M}+\text{H}]^+$  360.2.

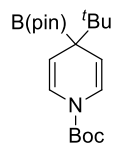

**tert-butyl 4-(tert-butyl)-4-(4,4,5,5-tetramethyl-1,3,2-dioxaborolan-2-yl)pyridine-1(4H)-carboxylate (10):** Synthesized using general procedure, purified by silica gel chromatography (10% EtOAc/hexane), white solid, yield 83%, mp 203-205 °C,  $^1\text{H}$  NMR (400 MHz,  $\text{CDCl}_3$ )  $\delta$  ppm 6.77 (dd,  $J = 8.5, 1.9$  Hz, 1H), 6.69 – 6.60 (m, 1H), 4.93 (dd,  $J = 8.7, 2.5$  Hz, 1H), 4.83 (dd,  $J = 8.6, 2.6$  Hz, 1H), 1.46 (s, 9H), 1.20 (s, 12H), 0.90 (s, 9H).  $^{13}\text{C}$  NMR (100 MHz,  $\text{CDCl}_3$ )  $\delta$  ppm 150.2, 122.5, 122.1, 109.4, 108.8, 83.3, 81.3, 37.1, 35.8 (quaternary carbon attached to boron weak broad peak), 28.2, 26.4, 24.7.  $^{11}\text{B}$  NMR (96 MHz,  $\text{CDCl}_3$ )  $\delta$  ppm 32.82. ESI MS  $m/z$ :  $[\text{M}+\text{H}]^+$  364.2.

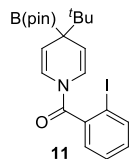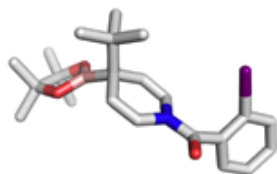

X-ray structure of **11**

**(4-(tert-butyl)-4-(4,4,5,5-tetramethyl-1,3,2-dioxaborolan-2-yl)pyridin-1(4H)-yl)(2-iodophenyl)methanone (11):** Synthesized using general procedure, purified by silica gel chromatography (10% EtOAc/hexane), white solid, yield 84%, mp 165 – 167 °C,  $^1\text{H}$  NMR (400 MHz,  $\text{CDCl}_3$ )  $\delta$  ppm 7.79 (d,  $J = 7.9$  Hz, 1H), 7.45 – 7.31 (m, 1H), 7.31 – 7.13 (m, 2H), 7.06 (td,  $J = 7.7, 1.7$  Hz, 1H), 5.99 (dd,  $J = 8.6, 1.8$  Hz, 1H), 5.31 (ddd,  $J = 8.6, 5.4, 2.4$  Hz, 1H), 4.91 (ddd,  $J = 8.4, 5.1, 2.5$  Hz, 1H), 1.19 (s, 12H), 0.92 (d,  $J = 10.4$  Hz, 9H).  $^{13}\text{C}$  NMR (100 MHz,  $\text{CDCl}_3$ )  $\delta$  ppm 165.7, 140.8, 139.3, 130.7, 128.3, 127.9, 123.2, 120.8, 114.5, 112.1, 92.8, 83.6, 37.2, 37.0, 26.8, 24.8.  $^{11}\text{B}$  NMR (96 MHz,  $\text{CDCl}_3$ )  $\delta$  ppm 31.64. ESI MS  $m/z$ :  $[\text{M}+\text{H}]^+$  494.8. A single crystal suitable for X-ray crystallography was grown by slow diffusion of pentane in ethyl acetate & pentane mixture at room temperature.

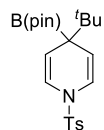

**4-(tert-butyl)-4-(4,4,5,5-tetramethyl-1,3,2-dioxaborolan-2-yl)-1-tosyl-1,4-dihydropyridine (12):** Synthesized using general procedure, purified by silica gel chromatography (15% EtOAc/hexane), white solid, yield 69%, mp 195-197 °C,  $^1\text{H}$  NMR (400 MHz,  $\text{CDCl}_3$ )  $\delta$  ppm 7.67 – 7.57 (m, 2H), 7.25 (d,  $J = 8.2$  Hz, 2H), 6.50 – 6.34 (m, 2H), 4.99 – 4.87 (m, 2H), 2.37 (s, 3H), 1.11 (s, 12H), 0.70 (s, 9H).  $^{13}\text{C}$  NMR (100 MHz,  $\text{CDCl}_3$ )  $\delta$  ppm 143.7, 134.6, 129.6, 126.9, 121.6, 112.1, 83.4, 36.3, 36.2 (quaternary carbon attached to boron weak broad peak), 26.2, 24.5, 21.5.  $^{11}\text{B}$  NMR (96 MHz,  $\text{CDCl}_3$ )  $\delta$  ppm 31.62. ESI MS  $m/z$ :  $[\text{M}+\text{H}]^+$  418.2.

## Preparation of Substituted pyridines

General procedure A: addition of alkyl lithium reagents to 4-pyridine boronic acid pinacol esters

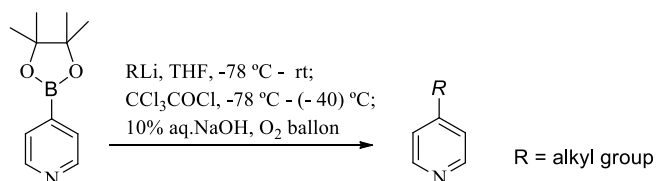

To a stirred solution of the 4-pyridine boronic acid pinacol ester (0.3 mmol, recrystallized from  $\text{CHCl}_3$  and hexanes) in dry THF (1.5 mL) at -78 °C was added RLi (0.33 mmol) dropwise for 5 min under argon atmosphere. The reaction was stirred at -78 °C

for 30 min then rt for 15 min. The reaction was then cooled to -78 °C and trichloroacetyl chloride (65  $\mu$ L, 0.6 mmol) was added dropwise with constant stirring. The reaction was stirred at -78 °C for 30 min then warmed to -40 °C and stirred overnight (15h). 10% aqueous NaOH solution was added and the reaction was warmed to rt. The reaction vessel was purged with oxygen and stirred under an oxygen balloon for 2h. An aqueous solution of Rochelles salt (sat. 1mL) was then added and the reaction continued to stir for 1 h. 10 mL of brine was added to the reaction mixture and the product was extracted with DCM (3  $\times$  10mL). The organic layer was collected, dried over Na<sub>2</sub>SO<sub>4</sub> and then concentrated in vacuo to afford the crude product (care was taken during evaporation of the solvent due to potential product volatility). This crude material was purified by silica gel chromatography.

**General procedure B:** addition of ArLi to 4-pyridine boronic acid pinacol esters

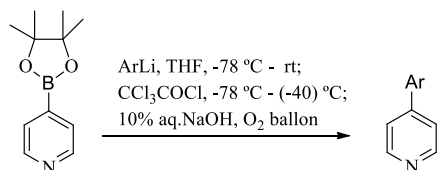

To a stirred solution of 4-pyridine boronic acid pinacol ester (0.3 mmol, recrystallized from CHCl<sub>3</sub> and hexanes) in dry THF (1.5 mL) at -78 °C was added ArLi (0.33 mmol) under argon atmosphere. The reaction was stirred at -78 °C for 30 min then rt for 5 min. The reaction was then cooled to -78 °C and trichloroacetyl chloride (65  $\mu$ L, 0.6 mmol) was added dropwise with constant stirring. The reaction was stirred at -78 °C for 30 min then warmed to -40 °C and stirred overnight (15h). 10% NaOH solution was added and the reaction was warmed to rt. The reaction vessel was purged with oxygen and stirred under an oxygen balloon for 2h. An aqueous solution of Rochelles salt (sat. 1mL) was then added and the reaction continued to stir for 1 h. 10 mL of brine was added to the reaction mixture and the product was extracted with DCM (3  $\times$  10mL). The organic layer was collected, dried over Na<sub>2</sub>SO<sub>4</sub> and then concentrated in vacuo. The crude product was purified by silica gel chromatography.

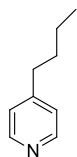

**4-butylpyridine (13)**<sup>1</sup>: Synthesized using general procedure A, purified by silica gel chromatography (1% methanol/DCM), yellow oil, yield 82%, <sup>1</sup>H NMR (400 MHz, CDCl<sub>3</sub>)  $\delta$  ppm 8.69 – 8.15 (m, 2H), 7.23 – 6.91 (m, 2H), 2.68 – 2.49 (t,  $J$  = 8.0 Hz, 2H), 1.73 – 1.51 (m, 2H), 1.35 (h,  $J$  = 7.6 Hz, 2H), 0.93 (t,  $J$  = 7.6 Hz, 3H). <sup>13</sup>C NMR (100 MHz, CDCl<sub>3</sub>)  $\delta$  ppm 151.7, 149.6, 123.9, 34.9, 32.4, 22.2, 13.8. ESI MS  $m/z$ : [M+H]<sup>+</sup> 136.1

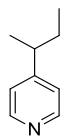

**4-secbutylpyridine (14)**<sup>2</sup>: Synthesized using general procedure A, purified by silica gel chromatography (1% methanol/DCM), yield 79%, <sup>1</sup>H NMR (400 MHz, CDCl<sub>3</sub>)  $\delta$  ppm 8.58 – 8.35 (m, 2H), 7.16 – 6.93 (m, 2H), 2.53 (h,  $J$  = 6.9 Hz, 1H), 1.74 – 1.44 (m, 2H), 1.31 – 1.07 (m, 3H), 0.77 (td,  $J$  = 7.5, 1.0 Hz, 3H). <sup>13</sup>C NMR (100 MHz, CDCl<sub>3</sub>)  $\delta$  ppm 156.4, 149.6, 122.6, 41.1, 30.4, 20.9, 11.9. ESI MS  $m/z$ : [M+H]<sup>+</sup> 136.1.

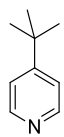

**t-butylpyridine (15)**<sup>3</sup>: Synthesized using general procedure A, purified by silica gel chromatography (1% methanol/DCM), yellow oil, yield 85%, <sup>1</sup>H NMR (400 MHz, CDCl<sub>3</sub>)  $\delta$  ppm 8.58 – 8.34 (dd,  $J$  = 4.8, 1.2 Hz, 2H), 7.38 – 7.14 (dd,  $J$  = 4.4, 1.2 Hz, 2H), 1.29 (s, 9H). <sup>13</sup>C NMR (100 MHz, CDCl<sub>3</sub>)  $\delta$  ppm 159.9, 149.6, 120.7, 34.6, 30.5. ESI MS  $m/z$ : [M+H]<sup>+</sup> 136.1.

(1)Comins, Daniel L.; Killpack, Michael O. *Heterocycles*, **1990**, *31*, 2025 – 2028.

(2)Akiba, Kin-ya; Iseki, Yuji; Wada, Makoto. *Tetrahedron Lett*, **1982**, *23*, 429 – 432.

(3)Russell et al. *J. Am. Chem. Soc.*, **1993**, *115*, 23, 10596 – 10604.



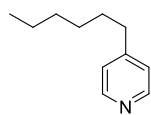

**4-hexylpyridine (16)**<sup>4</sup>: Synthesized using general procedure A, purified by silica gel chromatography (1% methanol/DCM), yellow oil, yield 83%, <sup>1</sup>H NMR (400 MHz, CDCl<sub>3</sub>) δ ppm 8.53 – 8.39 (m, 2H), 7.14 – 7.01 (m, 2H), 2.65 – 2.50 (m, 2H), 1.59 (tt, *J* = 9.1, 6.8 Hz, 2H), 1.39 – 1.16 (m, 6H), 0.92 – 0.77 (m, 3H). <sup>13</sup>C NMR (100 MHz, CDCl<sub>3</sub>) δ ppm <sup>13</sup>C NMR 151.7, 149.5, 123.9, 35.2, 31.6, 30.2, 28.8, 22.5, 14.0. ESI MS *m/z*: [M+H]<sup>+</sup> 164.1.

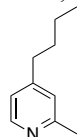

**4-butyl-2-methylpyridine (17)**<sup>5</sup>: Synthesized using general procedure A, purified by silica gel chromatography (1:2 Et<sub>2</sub>O/hexanes), yellow oil, yield 93%. <sup>1</sup>H NMR (400 MHz, CDCl<sub>3</sub>) δ ppm 8.35 (d, *J* = 5.16 Hz, 1H), 6.96 (s, 1H), 6.90 (d, *J* = 5.16 Hz, 1H), 2.55 (t, *J* = 7.67 Hz, 2H), 2.51 (s, 3H), 1.62-1.54 (m, 2H), 1.39-1.29 (m, 2H), 0.92 (t, *J* = 7.37, 3H). <sup>13</sup>C NMR (100 MHz, CDCl<sub>3</sub>) δ ppm 158.11, 151.96, 148.92, 123.38, 120.99, 34.95, 32.47, 24.35, 22.30, 13.86. ESI MS *m/z*: [M+H]<sup>+</sup> 150.2

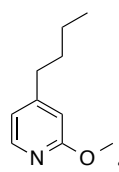

**4-butyl-2-methoxypyridine (18)**: Synthesized using general procedure A, crude material was purified by silica gel chromatography (1:2 Et<sub>2</sub>O/Hexanes), yellow oil, yield 80%. <sup>1</sup>H NMR (400 MHz, CDCl<sub>3</sub>) δ ppm 8.01 (d, *J* = 5.27, 1H), 6.68 (dd, *J* = 5.30, *J* = 1.30, 1H), 6.53 (s, 1H), 3.90 (s, 3H), 2.53 (t, *J* = 7.52, 2H), 1.60-1.52 (m, 2H), 1.37-1.27 (m, 2H), 0.90 (t, *J* = 7.47, 3H). <sup>13</sup>C NMR (100 MHz, CDCl<sub>3</sub>) δ ppm 164.5, 154.6, 146.4, 117.6, 110.1, 53.2, 34.8, 32.2, 22.2, 13.9. ESI MS *m/z*: [M+H]<sup>+</sup> 166.2

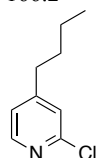

**4-butyl-2-chloropyridine 19**: Synthesized using general procedure A, crude material was purified by silica gel Chromatography (1:2 Et<sub>2</sub>O/Hexanes), yellow oil, yield 60%. <sup>1</sup>H NMR (400 MHz, CDCl<sub>3</sub>) δ ppm 8.25 (d, *J* = 5.05, 1H), 7.14 (s, 1H), 7.02 (d, *J* = 5.05, 1H), 2.59 (t, *J* = 7.75, 2H), 1.63-1.56 (m, 2H), 1.39-1.30 (m, 2H), 0.93 (t, *J* = 7.35, 3H). <sup>13</sup>C NMR (100 MHz, CDCl<sub>3</sub>) δ ppm 155.2, 151.1, 149.3, 129.1, 122.8, 34.7, 32.2, 22.2, 13.8. ESI MS *m/z*: [M+H]<sup>+</sup> 170.1

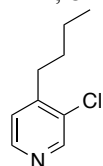

**4-butyl-3-chloropyridine 20**: Synthesized using general procedure A, crude material was purified by silica gel chromatography (1:2 Et<sub>2</sub>O/Hexanes), yellow oil, yield 50%. <sup>1</sup>H NMR (400 MHz, CDCl<sub>3</sub>) δ ppm 8.50 (s, 1H), 8.36 (d, *J* = 4.97, 1H), 7.14 (d, *J* = 4.97, 1H), 2.72 (t, *J* = 7.85, 2H), 1.65-1.57 (m, 2H), 1.44-1.35 (m, 2H), 0.95 (t, *J* = 7.34, 3H). <sup>13</sup>C NMR (100 MHz, CDCl<sub>3</sub>) δ ppm 149.2, 149.1, 147.6, 132.1, 124.8, 35.2, 30.9, 22.4, 13.9. ESI MS *m/z*: [M+H]<sup>+</sup> 170.1.

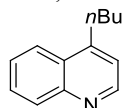

**4-butylquinoline (21)**: Synthesized using general procedure A, purified by silica gel chromatography (1% methanol/DCM), yellow oil, yield 77%. <sup>1</sup>H NMR (400 MHz, CDCl<sub>3</sub>) δ ppm 8.78 (d, *J* = 4.4 Hz, 1H), 8.12 – 8.06 (m, 1H), 8.06 – 7.98 (m, 1H), 7.68 (ddd, *J* = 8.3, 6.8, 1.4 Hz, 1H), 7.53 (ddd, *J* = 8.4, 6.8, 1.3 Hz, 1H), 7.27 – 7.17 (m, 1H), 3.14 – 2.94 (m, 2H), 1.81 – 1.66 (m, 2H), 1.45 (h, *J* = 7.4 Hz, 2H), 0.96 (t, *J* = 7.3 Hz, 3H). <sup>13</sup>C NMR (100 MHz, CDCl<sub>3</sub>) δ ppm 150.1, 148.7, 148.3, 130.2, 128.9, 127.6, 126.2, 123.6, 120.7, 32.2, 31.9, 22.7, 13.9. ESI MS *m/z*: [M+H]<sup>+</sup> 186.1.

(4) Andou et al. *Angew. Chem. Int. Ed.*, **2013**, *52*, 3213 – 3216.

(5) Kaiser et al. *J. Org. Chem.* **1973**, *38*, 77-74.

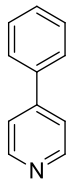

**4-phenylpyridine (22)**<sup>6</sup>: Synthesized using general procedure B, purified by silica gel chromatography(1% methanol/DCM), yellow solid, mp 67 – 72 °C, yield 84%, <sup>1</sup>H NMR (400 MHz, CDCl<sub>3</sub>) δ ppm 8.71 – 8.56 (m, 2H), 7.69 – 7.57 (m, 2H), 7.54 – 7.37 (m, 5H). <sup>13</sup>C NMR (100 MHz, CDCl<sub>3</sub>) δ ppm 150.3, 148.3, 138.1, 129.1, 129.0, 126.9, 121.6. ESI MS m/z: [M+H]<sup>+</sup> 156.1.

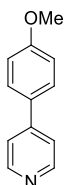

**4-(4-methoxyphenyl)pyridine (23)**<sup>7</sup>: Synthesized using general procedure B, purified by silica gel chromatography(1% methanol/DCM), white solid, mp 92-93 °C, yield 82%, <sup>1</sup>H NMR (400 MHz, CDCl<sub>3</sub>) δ ppm 8.59 (d, *J* = 4.0 Hz, 2H), 7.58 (d, *J* = 8.8 Hz, 2H), 7.47 – 7.43 (d, *J* = 4.0 Hz, 2H), 6.99 (d, *J* = 8.8 Hz, 2H), 3.84 (s, 3H). <sup>13</sup>C NMR (126 MHz, CDCl<sub>3</sub>) δ ppm 160.5, 150.1, 147.9, 130.3, 128.1, 121.1, 114.8, 55.4. ESI MS m/z: [M+H]<sup>+</sup> 186.1.

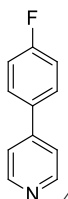

**4-(4-fluorophenyl)pyridine (24)**<sup>8</sup>: Synthesized using general procedure B, purified by silica gel chromatography(1% methanol/DCM), yield 85%, white solid, mp 116-118 °C, <sup>1</sup>H NMR (400 MHz, CDCl<sub>3</sub>) δ ppm 8.69 – 8.58 (m, 2H), 7.66 – 7.54 (m, 2H), 7.49 – 7.39 (m, 2H), 7.21 – 7.07 (m, 2H). <sup>13</sup>C NMR (100 MHz, CDCl<sub>3</sub>) δ ppm 163.4 (d, *J* = 251.47, C-F coupling), 150.3, 147.2, 134.2, 128.7 (d, *J* = 8.61, *meta* C-F coupling), 121.4, 116.1 (d, *J* = 26.2, *ortho* C-F coupling). ESI MS m/z: [M+H]<sup>+</sup> 174.1.

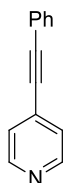

**4-(phenylethynyl)pyridine (25)**<sup>9</sup>: Synthesized using general procedure A, purified by silica gel chromatography(1% methanol/DCM), yellow oil, yield 87%, <sup>1</sup>H NMR (400 MHz, CDCl<sub>3</sub>) δ ppm 8.65 – 8.56 (m, 2H), 7.63 – 7.51 (m, 2H), 7.44 – 7.32 (m, 5H). <sup>13</sup>C NMR (100 MHz, CDCl<sub>3</sub>) 149.7, 131.9, 131.5, 129.2, 128.5, 125.5, 122.1, 93.9, 86.6. ESI MS m/z: [M+H]<sup>+</sup> 180.1.

#### General procedure C for the Synthesis of Chiral Pyridines

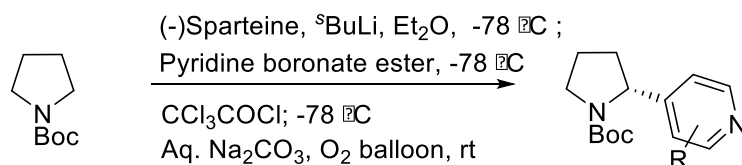

(6) Tanimoro, K.; Ueno, M.; Takeda, K.; Kirihata, M.; Tanimori, S., *J. Org. Chem.* **2012**, *77*, 7844-7849.

(7) Rao, Maddali L.N.; Dhanorkar, Ritesh J. *Eur. J. Org. Chem.*, **2014**, 2014, 5214 - 5228

(8) Gall et al. *Tetrahedron*, **2001**, *57*, 1923-1927.

(9) Moulton, Benjamin E., *J. Org. Chem.* **2011**, *76*, 5320-5334.

To a stirred solution of the (-) sparteine (76  $\mu$ L, 0.33 mmol) in Et<sub>2</sub>O (1.5 mL) was added s-BuLi (0.25 mL, 0.39 mmol) slowly dropwise at -78 °C. The reaction was stirred for 30 minutes at -78 °C. A Et<sub>2</sub>O (1 mL) solution of N-Bocpyrrolidine (68  $\mu$ L, 0.39 mmol) was added slowly dropwise into the reaction mixture at -78 °C. The reaction was stirred at -78 °C for 3h. A precooled Et<sub>2</sub>O (2 mL)/THF (2 mL) solution of Boronic ester (0.3 mol) was added dropwise to the reaction mixture at -78 °C. The reaction was stirred for another 3h at -78 °C. Trichloroacetyl chloride (120  $\mu$ L, 1.05 mmol) was added to the reaction mixture dropwise with constant stirring. The reaction was stirred for another 2h. After 2h the reaction was quenched by aq. Na<sub>2</sub>CO<sub>3</sub> solution (3 mL). The reaction vessel was purged with oxygen and stirred under an oxygen balloon for 2h. 10 mL of brine was added to the reaction mixture and the product was extracted with EtOAc (3  $\times$  10 mL). The organic layer was collected, dried over Na<sub>2</sub>SO<sub>4</sub> and then concentrated in vacuo to afford the crude product. This crude material was purified by silica gel chromatography to afford the desired pyridines.

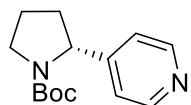

**tert-butyl (R)-2-(pyridin-4-yl)pyrrolidine-1-carboxylate (26):** Synthesized using general procedure C, purified by silica gel chromatography (60% EtOAc/hexane), gum, yield 70%,  $[\alpha]_D^{20} +49$  (c = 0.2, CHCl<sub>3</sub>), NMR (400 MHz, CDCl<sub>3</sub>, rotamers)  $\delta$  ppm 8.50 (d,  $J$  = 5.1 Hz, 2H), 7.16 – 6.98 (m, 2H), 4.99 – 4.81 (m, 0.5H), 4.71 (m, 0.6H), 3.70 – 3.39 (m, 2H), 2.32 (m, 1H), 1.94 – 1.72 (m, 3H), 1.43 (s, 3H), 1.17 (s, 6H). <sup>13</sup>C NMR (100 MHz, CDCl<sub>3</sub>, rotamers)  $\delta$  ppm 154.2, 149.6, 120.7, 79.8, 60.5, 59.9, 47.3, 47.1, 35.5, 34.3, 28.4, 28.1, 23.6, 23.2. ESI MS  $m/z$ :  $[M+H]^+$  249.2; The ee was determined by HPLC analysis using Daicel Chiralpak AD-H column (25 cm 0.46 cm ID), conditions: n-hexane/EtOH = 90:10, 0.5 mL/min, 254 nm;  $t_R$  = 13.3 min (major) and 27.5 min (minor). e.r. = 98:2.

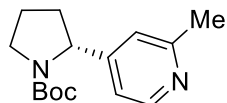

**tert-butyl (R)-2-(2-methylpyridin-4-yl)pyrrolidine-1-carboxylate (27):** Synthesized using general procedure C, purified by silica gel chromatography (60% EtOAc/hexane), gum, yield 76%,  $[\alpha]_D^{20} +74$  (c = 0.3, CHCl<sub>3</sub>), NMR (400 MHz, CDCl<sub>3</sub>, rotamers)  $\delta$  ppm 8.37 (d,  $J$  = 5.1 Hz, 1H), 6.92 (d,  $J$  = 1.7 Hz, 1H), 6.87 (dd,  $J$  = 5.2, 1.7 Hz, 1H), 4.90 – 4.77 (m, 0.5H), 4.67 (m, 0.7H), 3.66 – 3.43 (m, 2H), 2.50 (s, 3H), 2.30 (m, 1H), 1.80 (m, 3H), 1.33 (s, 3H), 1.17 (s, 6H). <sup>13</sup>C NMR (100 MHz, CDCl<sub>3</sub>, rotamers)  $\delta$  ppm 158.3, 154.4, 153.4, 149.0, 120.1, 117.9, 117.7, 79.7, 60.4, 59.9, 47.3, 47.0, 35.4, 34.3, 24.4, 23.6, 23.2. ESI MS  $m/z$ :  $[M+H]^+$  263.2. The ee was determined by HPLC analysis using Daicel Chiralpak AD-H column (25 cm 0.46 cm ID), conditions: n-hexane/EtOH = 98:2, 1.0 mL/min, 245 nm;  $t_R$  = 15.3 min (major) and 41.3 min (minor). e.r. = 98:2.

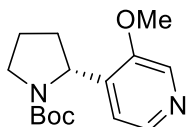

**tert-butyl (R)-2-(3-methoxypyridin-4-yl)pyrrolidine-1-carboxylate (28):** Synthesized using general procedure C, purified by silica gel chromatography (60% EtOAc/hexane), gum, yield 78%,  $[\alpha]_D^{20} +85$  (c = 0.3, CHCl<sub>3</sub>), NMR (400 MHz, CDCl<sub>3</sub>, rotamers)  $\delta$  ppm 8.31 – 8.09 (m, 2H), 6.96 (m, 1H), 5.17 (m, 0.4H), 5.03 (dd,  $J$  = 8.5, 3.8 Hz, 0.6H), 3.91, 3.90 (s, 3H), 3.70 – 3.39 (m, 2H), 2.42 – 1.97 (m, 1H), 1.92 – 1.65 (m, 3H), 1.44 (s, 3H), 1.19 (s, 6H). <sup>13</sup>C NMR (100 MHz, CDCl<sub>3</sub>, rotamers)  $\delta$  ppm 154.3, 152.4, 142.6, 141.5, 140.4, 132.8, 120.3, 119.8, 79.4, 55.9, 55.9, 55.4, 47.2, 46.9, 33.4, 32.3, 28.5, 28.1, 23.5, 23.1. ESI MS  $m/z$ :  $[M+H]^+$  279.2. The ee was determined by HPLC analysis using Daicel Chiralpak AD-H column (25 cm 0.46 cm ID), conditions: n-hexane/EtOH = 98:2, 1.0 mL/min, 224 nm;  $t_R$  = 38.8 min (major) and 62.8 min (minor). e.r. = 99.5:0.5.

General procedure D: addition of aryl zinc to 4-pyridine boronic acid pinacol esters

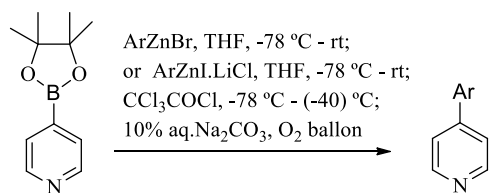

To a stirred solution of 4-pyridine boronic acid pinacol ester (0.3 mmol, recrystallized from CHCl<sub>3</sub> and hexanes) in dry THF (1.0 mL) at 0 °C was added an arylzinc bromide solution (0.33 mmol) dropwise over 5 min under argon atmosphere. In case of functionalized ArI, ArZnI.LiCl in THF was prepared by using Knochel method<sup>10</sup> and titrated<sup>11</sup> using iodine before addition. The reaction was stirred at 0 °C for 20 min then rt for 24 h under argon atmosphere. The reaction was cooled to -78 °C and trichloroacetyl chloride (65 μL, 0.6 mmol) was added dropwise with constant stirring. The reaction was stirred at -78 °C for 30 min then warmed to -40 °C and stirred for 20h. A saturated Na<sub>2</sub>CO<sub>3</sub> solution was added and the reaction was warmed to rt. The reaction vessel was purged with oxygen and stirred under an oxygen atmosphere for 2h. An aqueous solution of Rochelles salt (sat. 1mL) was then added and the reaction was stirred for additional 1 h. 10 mL of brine was added to the reaction mixture and the product was extracted with DCM (3 × 10mL). The organic layer was collected, dried over Na<sub>2</sub>SO<sub>4</sub> and then concentrated in vacuo to afford a crude product. The crude product was purified by silica gel chromatography.

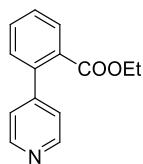

**ethyl 2-(pyridin-4-yl)benzoate (29)**<sup>12</sup>: Synthesized using general procedure D, purified by silica gel chromatography (1% methanol/DCM), white solid, mp 67 – 69 °C, yield 83%, <sup>1</sup>H NMR (400 MHz, CDCl<sub>3</sub>) δ ppm 8.66 – 8.56 (m, 2H), 7.90 (dd, *J* = 7.8, 1.5 Hz, 1H), 7.55 (td, *J* = 7.5, 1.5 Hz, 1H), 7.47 (td, *J* = 7.6, 1.4 Hz, 1H), 7.30 (dd, *J* = 7.6, 1.3 Hz, 1H), 7.24 – 7.18 (m, 2H), 4.09 (q, *J* = 7.1 Hz, 2H), 1.01 (t, *J* = 7.1 Hz, 3H). <sup>13</sup>C NMR (100 MHz, CDCl<sub>3</sub>) δ ppm 167.7, 149.6, 149.3, 139.9, 131.6, 130.6, 130.3, 130.1, 128.3, 123.4, 61.1, 13.6. ESI MS *m/z*: [M+H]<sup>+</sup> 228.1.

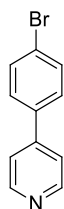

**4-(4-bromophenyl)pyridine (30)**<sup>13</sup>: Synthesized using general procedure D, purified by silica gel chromatography (1% methanol/DCM), white solid, mp 122 - 124 °C, yield 89%, <sup>1</sup>H NMR (400 MHz, CDCl<sub>3</sub>) δ ppm 8.71 – 8.57 (dd, *J* = 5.6, 2.0 Hz, 2H), 7.64 – 7.54 (m, 2H), 7.54 – 7.36 (m, 4H). <sup>13</sup>C NMR (100 MHz, CDCl<sub>3</sub>) δ ppm 150.3, 147.2, 137.0, 132.3, 128.5, 123.5, 121.3. ESI MS *m/z*: [M+H]<sup>+</sup> 236.0.

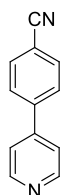

**4-(pyridin-4-yl)benzotrile (31)**<sup>14</sup>: Synthesized using general procedure D, purified by silica gel chromatography (1% methanol/DCM), white solid, mp 76 – 77 °C, yield 88%, <sup>1</sup>H NMR (400 MHz, CDCl<sub>3</sub>) δ ppm 8.76 – 8.66 (dd, *J* = 4.4, 1.6 Hz, 2H), 7.82 – 7.68 (m, 4H), 7.53 – 7.44 (dd, *J* = 4.8, 2.0 Hz, 2H). <sup>13</sup>C NMR (100 MHz, CDCl<sub>3</sub>) δ ppm 150.6, 146.3, 142.6, 132.9, 127.7, 121.6, 118.4, 112.8. ESI MS *m/z*: [M+H]<sup>+</sup> 181.1.

(10) Krasovskiy, A.; Malakhov, V.; Gavryushin, A.; Knochel, P., *Angew. Chem. Int. Ed.* **2006**, *45*, 6040-6044.

(11) Krasovskiy, A.; Knochel, P. *Synthesis*, **2006**, 890-891.

(12) Rebstock, A.-S.; Mongin, F.; Trécourt, F.; Quéguiner, G., *Tetrahedron* **2003**, *59*, 4973-4977.

(13) Choi-Sledeski, Y. *M.J. Med. Chem.* **1999**, *42*, 3572-3587.

(14) Molander, G. A.; Canturk, B.; Kennedy, L. E., *J. Org. Chem.* **2009**, *74*, 973-980.

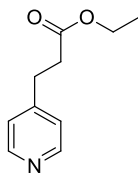

**ethyl 3-(pyridin-4-yl)propanoate (32)<sup>15</sup>:** To a stirred solution of 3-ethoxy-3-oxopropylzinc bromide (0.5 M solution in THF, 0.95 mL, 0.48 mmol) in dry THF (1.0 mL) at -50 °C was added <sup>t</sup>BuMgCl (1 M in THF, 0.48 mL, 0.48 mmol) dropwise for 5 min under argon atmosphere. The reaction was stirred at -50 °C for 5 min then transferred via cannula to a vial containing 4-pyridineboronic acid pinacol ester (50 mg, 0.24 mmol) in THF (0.25 mL). The reaction was stirred at -50 °C for 30 min then slowly warmed to room temperature and stirred for 16 h. The reaction was cooled to -78 °C and trichloroacetyl chloride (65 μL, 0.6 mmol) was added dropwise with constant stirring. The reaction was stirred at -78 °C for 30 min then warmed to -40 °C and stirred for 20h. A saturated Na<sub>2</sub>CO<sub>3</sub> solution was added and the reaction was warmed to rt. The reaction vessel was purged with oxygen and stirred under oxygen atmosphere for 2h. Brine was added to the reaction mixture and the product was extracted with EtOAc (3 × 10mL). The organic layer was collected, dried over Na<sub>2</sub>SO<sub>4</sub> and then concentrated in vacuo to afford crude oil, which was purified by silica gel chromatography (1% MeOH in DCM) to afford the product as yellow oil (36 mg, 83%). <sup>1</sup>H NMR (400 MHz, CDCl<sub>3</sub>) δ ppm 8.59 – 8.40 (m, 2H), 7.18 – 7.06 (m, 2H), 4.13 (qd, *J* = 7.2, 1.7 Hz, 2H), 2.94 (dd, *J* = 8.5, 6.7 Hz, 2H), 2.64 (td, *J* = 7.6, 1.7 Hz, 2H), 1.36 – 1.09 (m, 4H). <sup>13</sup>C NMR (100 MHz, CDCl<sub>3</sub>) δ ppm 172.2, 149.9, 149.4, 123.7, 60.7, 34.5, 30.1, 14.2. ESI MS *m/z*: [M+H]<sup>+</sup> 180.1.

#### General procedure E: addition of alkyl or aryl Grignards to 4-pyridine boronic acid pinacol esters

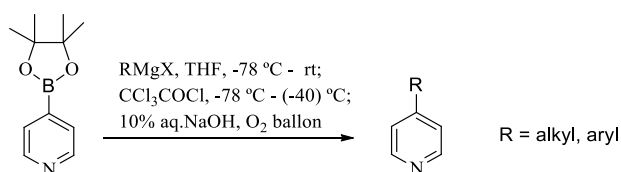

To a stirred solution of 4-pyridine boronic acid pinacol ester (0.3 mmol, recrystallized from CHCl<sub>3</sub> and hexanes) in dry THF (1.5 mL) at -78 °C was added alkyl/aryl magnesium halide solution (0.33 mmol) dropwise for 5 min under argon atmosphere. The reaction was stirred at -78 °C for 10 min then rt for 2 h. The reaction was then cooled to -78 °C and trichloroacetyl chloride (65 μL, 0.6 mmol) was added dropwise with constant stirring. The reaction was stirred at -78 °C for 30 min then warmed to -40 °C and stirred overnight (18h). 10% NaOH solution was added and the reaction was warmed to rt. The reaction vessel was purged with oxygen and stirred under oxygen balloon for 2h. An aqueous solution of Rochelles salt (sat. 1mL) was then added and the reaction continued to stir for 1 h. 10 mL of brine was added to the reaction mixture and the product was extracted with DCM (3 × 10mL). The organic layer was collected, dried over Na<sub>2</sub>SO<sub>4</sub> then concentrated in vacuo to afford the crude product (care was taken during evaporation of the solvent due to potential product volatility). The crude product was purified by silica gel chromatography.

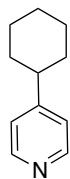

**4-cyclohexylpyridine<sup>16</sup>(33):** Synthesized using general procedure E, purified by silica gel chromatography (1:8 ethyl acetate/hexanes), yellow oil, 81%: <sup>1</sup>H NMR (400 MHz, CDCl<sub>3</sub>) δ ppm 8.46 (d, *J* = 5.73, 2H), 7.09 (d, *J* = 5.90, 2H), 2.50-2.43 (m, 1H), 1.89-1.81 (m, 4H), 1.76-1.71 (m, 1H), 1.43-1.31 (m, 4H), 1.28-1.17 (m, 1H). <sup>13</sup>C NMR (100 MHz, CDCl<sub>3</sub>) δ ppm 156.4, 149.7, 122.3, 43.8, 33.5, 26.5, 25.9. ESI MS *m/z*: [M+H]<sup>+</sup> 162.1.

(15) Hunter, C. A.; Misuraca, M. C.; Turega, S. M., *J. Am. Chem. Soc.* **2011**, *133*, 582-594.

(16) Branchaud, B. P.; Choi, Y. L., *J. Org. Chem.* **1988**, *53*, 4638-4641.

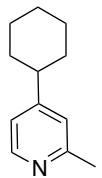

**4-cyclohexyl-2-methylpyridine (34)**: Synthesized using general procedure E, purified by silica gel chromatography (1:2 ethyl acetate/hexanes), yellow oil, 80%.  $^1\text{H}$  NMR (400 MHz,  $\text{CDCl}_3$ )  $\delta$  ppm 8.35 (d,  $J = 5.14$ , 1H), 6.96 (s, 1H), 6.90 (d,  $J = 5.14$ , 1H), 2.50 (s, 3H), 2.46-2.39 (m, 1H), 1.87-1.79 (m, 4H), 1.76-1.71 (m, 1H), 1.42-1.34 (m, 4H), 1.27-1.20 (m, 1H).  $^{13}\text{C}$  NMR (100 MHz,  $\text{CDCl}_3$ )  $\delta$  ppm 158.2, 156.8, 150.0, 121.8, 119.4, 43.8, 33.5, 26.5, 26.0, 24.4. ESI MS  $m/z$ :  $[\text{M}+\text{H}]^+$  176.2

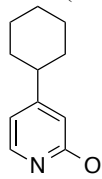

**4-cyclohexyl-2-methoxypyridine (35)**: Synthesized using general procedure E, purified by silica gel chromatography (1:2  $\text{Et}_2\text{O}$ /Hexanes), yellow oil, 73%.  $^1\text{H}$  NMR (400 MHz,  $\text{CDCl}_3$ )  $\delta$  ppm 8.02 (d,  $J = 5.21$ , 1H), 6.71 (dd,  $J = 5.35$ ,  $J = 1.24$ , 1H), 6.55 (s, 1H), 3.90 (s, 3H), 2.45-2.40 (m, 1H), 1.86-1.78 (m, 4H), 1.75-1.70 (m, 1H), 1.41-1.29 (m, 4H), 1.27-1.17 (m, 1H).  $^{13}\text{C}$  NMR (100 MHz,  $\text{CDCl}_3$ )  $\delta$  ppm 164.5, 159.5, 146.4, 116.1, 108.6, 53.3, 43.7, 33.4, 26.5, 25.9. ESI MS  $m/z$ :  $[\text{M}+\text{H}]^+$  192.1

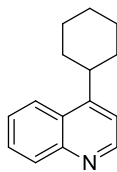

**4-cyclohexylquinoline (36)**<sup>17</sup>: Synthesized using general procedure E, purified by silica gel chromatography (25%  $\text{EtOAc}$  in Hexane), yellow gum, yield 70%.  $^1\text{H}$  NMR (400 MHz,  $\text{CDCl}_3$ )  $\delta$  ppm 8.83 (d,  $J = 4.6$  Hz, 1H), 8.10 (td,  $J = 9.2$ , 8.8, 1.6 Hz, 2H), 7.68 (ddd,  $J = 8.4$ , 6.8, 1.4 Hz, 1H), 7.54 (ddd,  $J = 8.4$ , 6.9, 1.2 Hz, 1H), 7.27 (d,  $J = 4.5$  Hz, 1H), 3.39 – 3.25 (m, 1H), 2.06 – 1.79 (m, 5H), 1.62 – 1.26 (m, 5H).  $^{13}\text{C}$  NMR (100 MHz,  $\text{CDCl}_3$ )  $\delta$  ppm 153.7, 150.2, 148.1, 130.1, 128.9, 126.9, 126.2, 123.0, 117.5, 38.9, 33.5, 26.9, 26.2. ESI MS  $m/z$ :  $[\text{M}+\text{H}]^+$  212.1.

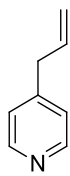

**4-allylpyridine (37)**<sup>18</sup>: Synthesized using general procedure E, purified by silica gel chromatography (1% methanol/DCM), yellow oil, yield 80%.  $^1\text{H}$  NMR (400 MHz,  $\text{CDCl}_3$ )  $\delta$  ppm 8.52 (d,  $J = 4.8$  Hz, 2H), 7.13 (d,  $J = 4.8$  Hz, 2H), 5.94 (m, 1H), 5.15 (m, 2H), 3.40 (m, 2H).  $^{13}\text{C}$  NMR (100 MHz,  $\text{CDCl}_3$ )  $\delta$  ppm 149.8, 148.9, 135.2, 123.9, 117.4, 39.4. ESI MS  $m/z$ :  $[\text{M}+\text{H}]^+$  120.1.

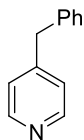

**4-benzylpyridine (38)**<sup>19</sup>: Synthesized using general procedure E, purified by silica gel chromatography (1% methanol/DCM), yellow oil, yield 85%.  $^1\text{H}$  NMR (400 MHz,  $\text{CDCl}_3$ )  $\delta$  ppm 8.61 – 8.36 (m, 2H), 7.39 – 7.08 (m, 7H), 3.99 (s, 2H).  $^{13}\text{C}$  NMR (100 MHz,  $\text{CDCl}_3$ )  $\delta$  ppm 151.1, 148.9, 138.5, 129.0, 128.8, 126.8, 124.4, 41.3. ESI MS  $m/z$ :  $[\text{M}+\text{H}]^+$  170.1.

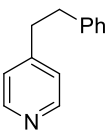

**4-phenethylpyridine (39)**<sup>20</sup>: Synthesized using general procedure E, purified by silica gel chromatography (1%

(17) Luo et al., *Org. Lett.* **2007**, 22, 4571-4574.

(18) Ishikura, Minoru., *J. Heterocycl. Chem.* **1987**, 24, 377-386.

(19) Katrizky et al., *Org. Lett.* **2001**, 3, 2807-2809.

methanol/DCM), yellow gum, yield 84%,  $^1\text{H}$  NMR (400 MHz,  $\text{CDCl}_3$ )  $\delta$  ppm 8.56 – 8.41 (m, 2H), 7.40 – 6.96 (m, 7H), 2.94 (s, 4H).  $^{13}\text{C}$  NMR (100 MHz,  $\text{CDCl}_3$ )  $\delta$  ppm 151.1, 149.1, 140.5, 128.5, 128.4, 126.3, 124.1, 37.1, 36.51. ESI MS  $m/z$ :  $[\text{M}+\text{H}]^+$  184.1.

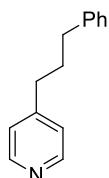

**4-(3-phenylpropyl)pyridine (40)**<sup>21</sup>: Synthesized using general procedure E, purified by silica gel chromatography (1% methanol/DCM), yellow gum, yield 85%,  $^1\text{H}$  NMR (400 MHz,  $\text{CDCl}_3$ )  $\delta$  ppm 8.50 (d,  $J = 5.7$  Hz, 2H), 7.41 – 7.06 (m, 7H), 2.66 (td,  $J = 7.8, 3.7$  Hz, 4H), 2.08 – 1.86 (m, 2H).  $^{13}\text{C}$  NMR (100 MHz,  $\text{CDCl}_3$ )  $\delta$  ppm 151.8, 149.2, 141.5, 128.4, 128.4, 125.9, 124.0, 35.3, 34.7, 31.7. ESI MS  $m/z$ :  $[\text{M}+\text{H}]^+$  198.1.

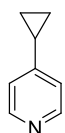

**4-cyclopropylpyridine (41)**<sup>23</sup>: Synthesized using general procedure E, purified by silica gel chromatography (1% methanol/DCM), yellow oil, yield 80%,  $^1\text{H}$  NMR (400 MHz,  $\text{Acetone-}d_6$ )  $\delta$  ppm 8.43 – 8.29 (m, 2H), 7.04 (dt,  $J = 4.8, 1.4$  Hz, 2H), 1.96–1.85 (1H, m), 1.14 – 0.99 (m, 2H), 0.86 – 0.70 (m, 2H).  $^{13}\text{C}$  NMR (100 MHz,  $\text{Acetone-}d_6$ )  $\delta$  ppm 153.4, 149.4, 120.5, 14.4, 9.9. ESI MS  $m/z$ :  $[\text{M}+\text{H}]^+$  120.1.

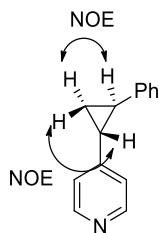

**(±) 4-(2-phenylcyclopropyl)pyridine (42)**<sup>24</sup>: The relative stereochemistry was confirmed by 1D-NOE of the corresponding protons. Synthesized using general procedure E, purified by silica gel chromatography (1% methanol/DCM), yellow oil, yield 72%,  $^1\text{H}$  NMR (400 MHz,  $\text{CDCl}_3$ )  $\delta$  ppm 8.50 (m, 2H), 7.55 – 6.85 (m, 7H), 2.27 (ddd,  $J = 8.7, 6.2, 4.3$  Hz, 1H), 2.12 (ddd,  $J = 8.5, 5.8, 4.3$  Hz, 1H), 1.59 (dt,  $J = 8.5, 5.8$  Hz, 1H), 1.53 (dt,  $J = 8.9, 5.6$  Hz, 1H).  $^{13}\text{C}$  NMR (100 MHz,  $\text{CDCl}_3$ )  $\delta$  ppm 151.9, 149.5, 141.2, 128.5, 126.3, 125.8, 120.9, 29.1, 27.2, 18.9. ESI MS  $m/z$ :  $[\text{M}+\text{H}]^+$  196.1.

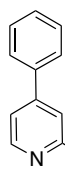

**2-methyl-4-phenylpyridine (43)**<sup>25</sup>: Synthesized using general procedure E, purified by silica gel chromatography (1% MeOH/DCM), yellow oil, yield 83%,  $^1\text{H}$  NMR (400 MHz,  $\text{CDCl}_3$ )  $\delta$  ppm 8.54 (d,  $J = 5.18$  Hz, 1H), 7.64 – 7.61 (m, 2H), 7.50–7.41 (m, 5H), 7.37 (brs, 1H), 7.31 (dd,  $J = 5.18$  Hz,  $J = 1.37$  Hz, 1H), 2.63 (s, 3H).  $^{13}\text{C}$  NMR (100 MHz,  $\text{CDCl}_3$ )  $\delta$  ppm 158.9, 149.6, 148.7, 138.5, 129.0, 128.8, 127.0, 121.2, 118.8, 24.6. ESI MS  $m/z$ :  $[\text{M}+\text{H}]^+$  170.1.

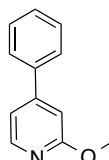

**2-methoxy-4-phenylpyridine (44)**: Synthesized using general procedure E, purified by silica gel chromatography (0.5% MeOH/DCM), yellow oil, yield 77%:  $^1\text{H}$  NMR (400 MHz,  $\text{CDCl}_3$ )  $\delta$  ppm 8.21 (d,  $J = 5.37$  Hz, 1H), 7.63 – 7.61 (m, 2H),

(20) Lautens et al., *J. Am. Chem. Soc.* **2001**, *123*, 5358.

(21) Molander et al., *Org. Lett.* **2010**, *12*, 5783–5785.

(23) Lemhadi et al., *Synth. Commun.* **2006**, *36*, 121–128.

(24) Lavine et al., *J. Org. Chem.* **1973**, *38*, 3942–3943.

(25) Wei et al., *J. Am. Chem. Soc.* **2013**, *135*, 3756–3759.

7.49-7.40 (m, 3H), 7.11 (dd,  $J = 5.37$  Hz,  $J = 1.09$  Hz, 1H) 3.99 (s, 3H).  $^{13}\text{C}$  NMR (100 MHz,  $\text{CDCl}_3$ )  $\delta$  ppm 164.9, 151.2, 147.2, 138.3, 129.0, 129.0, 127.0, 115.4, 108.5, 53.5. ESI MS  $m/z$ :  $[\text{M}+\text{H}]^+$  186.1

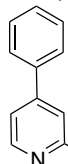

**2-chloro-4-phenylpyridine (45)**<sup>26</sup>: Synthesized using general procedure E, purified by silica gel chromatography (1:10 ethyl acetate/hexanes), yellow solid, yield 83%.  $^1\text{H}$  NMR (400 MHz,  $\text{CDCl}_3$ )  $\delta$  ppm 8.43 (d,  $J = 5.21$  Hz, 1H), 7.63 – 7.60 (m, 2H), 7.55 (d,  $J = 1.08$  Hz, 1H) 7.53-7.47 (m, 3H), 7.43 (dd,  $J = 5.19$  Hz,  $J = 1.51$  Hz, 1H).  $^{13}\text{C}$  NMR (100 MHz,  $\text{CDCl}_3$ )  $\delta$  ppm 152.2, 151.6, 150.0, 136.9, 129.7, 129.3, 127.1, 122.0, 120.5. ESI MS  $m/z$ :  $[\text{M}+\text{H}]^+$  190.0.

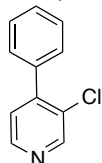

**3-chloro-4-phenylpyridine (46)**<sup>27</sup>: Synthesized using general procedure E, purified by silica gel chromatography (0.5% MeOH/DCM), yellow oil, yield 80%.  $^1\text{H}$  NMR (400 MHz,  $\text{CDCl}_3$ )  $\delta$  ppm 8.68 (s, 1H), 8.53 (d,  $J = 4.96$  Hz, 1H), 7.49 – 7.44 (m, 5H), 7.29 (d,  $J = 4.93$  Hz, 1H).  $^{13}\text{C}$  NMR (100 MHz,  $\text{CDCl}_3$ )  $\delta$  ppm 150.0, 147.8, 147.6, 136.5, 130.2, 128.9, 128.9, 128.4, 125.4. ESI MS  $m/z$ :  $[\text{M}+\text{H}]^+$  190.0.

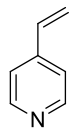

**4-vinylpyridine (47)**<sup>28</sup>: Synthesized using general procedure E, purified by silica gel chromatography (1% DCM/methanol), yellow oil, yield 76%.  $^1\text{H}$  NMR (400 MHz,  $\text{CDCl}_3$ )  $\delta$  ppm 8.53 (dd,  $J = 4.6$ , 1.0 Hz, 2H), 7.32 – 7.15 (m, 2H), 6.63 (dd,  $J = 17.6$ , 10.8 Hz, 1H), 5.94 (d,  $J = 17.6$  Hz, 1H), 5.46 (d,  $J = 10.8$  Hz, 1H).  $^{13}\text{C}$  NMR (100 MHz,  $\text{CDCl}_3$ )  $\delta$  ppm 150.1, 144.7, 134.7, 120.7, 118.6. ESI MS  $m/z$ :  $[\text{M}+\text{H}]^+$  106.1.

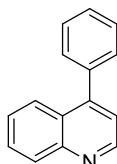

**4-phenylquinoline (48)**<sup>29</sup>: Synthesized using general procedure E, purified by silica gel chromatography (25% EtOAc in Hexane), light yellow solid, yield 78 %, mp 62 – 64 °C,  $^1\text{H}$  NMR (400 MHz,  $\text{CDCl}_3$ )  $\delta$  8.94 (d,  $J = 4.4$  Hz, 1H), 8.23 – 8.10 (m, 1H), 7.97 – 7.85 (m, 1H), 7.72 (ddd,  $J = 8.4$ , 6.9, 1.4 Hz, 1H), 7.57 – 7.43 (m, 6H), 7.33 (d,  $J = 4.4$  Hz, 1H).  $^{13}\text{C}$  NMR (100 MHz,  $\text{CDCl}_3$ )  $\delta$  149.9, 148.6, 148.5, 137.9, 129.8, 129.5, 129.3, 128.6, 128.4, 126.7, 126.6, 125.9, 121.3. ESI MS  $m/z$ :  $[\text{M}+\text{H}]^+$  206.1.

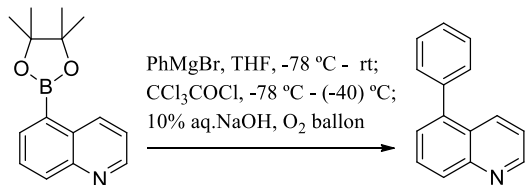

**5-phenylquinoline (49)**<sup>30</sup>: To a stirred solution of 5-quinolineboronic acid pinacol ester (76 mg, 0.3 mmol, recrystallized from  $\text{CHCl}_3$  and hexanes) in dry THF (1.5 mL) at  $-78$  °C was added 0.96 M phenylmagnesium bromide solution in THF (343  $\mu\text{L}$ , 0.33 mmol) dropwise for 15 min under argon atmosphere. The reaction was stirred at  $-78$  °C for 30 min then brought to 0 - 2 °C for 2 h, then rt for 20 min. The reaction was then cooled to  $-78$  °C and trichloroacetyl chloride (65  $\mu\text{L}$ , 0.6 mmol) was added dropwise with constant stirring. The reaction was stirred at  $-78$  °C for 2 h then warmed to rt and stirred for 20 min. 10% NaOH solution was added and the reaction was stirred for 2 h under oxygen balloon. An aqueous solution of Rochelle's salt (sat. 1 mL) was then added and the reaction was stirred for 1 h. 10 mL of brine was added to the reaction mixture and the product was extracted with DCM (3  $\times$  10 mL). The organic layer was collected, dried over  $\text{Na}_2\text{SO}_4$  and then concentrated in vacuo to afford a yellow gum.

(26) Gurung, S. K et al. *Org. Lett.* **2014**, *16*, 1264-1267.

(27) Guo, P et al. *J. Am. Chem. Soc.* **2011**, *133*, 16338-16341.

(28) Battace, A et al. *J. Organomet. Chem.* **2005**, *690*, 3790-3802.

(29) An, Xiao-De; Yu, Shouyun., *Org. Lett.* **2015**, *17*, 2692 – 2695.

(30) Gandhamsetty, N et al. *J. Am. Chem. Soc.* **2014**, *136*, 16780-16783.



The crude product was purified by silica gel chromatography (15% EtOAc in Hexane) to afford the product as yellow gum (25 mg, 40%). <sup>1</sup>H NMR (400 MHz, CDCl<sub>3</sub>) δ ppm 8.98 – 8.87 (m, 1H), 8.24 (dd, *J* = 8.5, 1.6, Hz, 1H), 8.13 (dd, *J* = 8.7, 1.4 Hz, 1H), 7.76 (m, 1H), 7.57 – 7.41 (m, 6H), 7.35 (dd, *J* = 8.6, 4.1 Hz, 1H). <sup>13</sup>C NMR (100 MHz, CDCl<sub>3</sub>) δ ppm 150.2, 148.5, 140.5, 139.3, 134.4, 130.0, 128.9, 128.5, 127.7, 127.3, 126.7, 121.1. ESI MS *m/z*: [M+H]<sup>+</sup> 206.1.

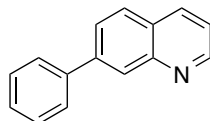

**7-phenylquinoline (50)**<sup>32</sup>: To a -78 °C stirred solution of 7-quinolineboronic acid pinacol ester (76 mg, 0.3 mmol) in THF (1.5 mL) was added phenyl magnesium bromide (351 μL, 0.33 mmol) (0.94 M in THF). The reaction was stirred at -78 °C and slowly allowed to warm to rt over 2 hours. After stirring at rt for 20 min the reaction was cooled to -78 °C and trichloroacetyl chloride (65 μL, 0.6 mmol) was added dropwise. Upon complete addition of the acid chloride the reaction was warmed to 4 °C and stirred at temperature overnight (15h). 10% NaOH (1 mL) was then added and the reaction was warmed to rt. The reaction vessel was then purged with oxygen and the reaction was stirred under oxygen atmosphere for 2 hours. Rochelles salt (sat. 1 mL) was then added and the reaction was stirred for an additional 1 hour. 20 mL of Brine was added and DCM was then used to extract the product (3 x 10 mL). The organic layer was collected, dried over sodium sulfate and then concentrated in vacuo to give the crude product. The crude material was purified by silica gel chromatography (1:10 ethyl acetate/hexanes) to give a clear oil, 18 mg, 30%: <sup>1</sup>H NMR (400 MHz, CDCl<sub>3</sub>) δ ppm 8.93 (dd, *J* = 4.30, *J* = 1.68, 1H), 8.32 (s, 1H), 8.17 (d, *J* = 8.40, 1H), 7.88 (d, *J* = 8.40, 1H), 7.82 (dd, *J* = 8.45, *J* = 1.85, 1H), 7.76-7.74 (m, 2H), 7.52-7.98 (m, 2H), 7.42-7.37 (m, 2H). <sup>13</sup>C NMR (100 MHz, CDCl<sub>3</sub>) δ ppm 180.9, 148.6, 142.2, 140.2, 135.7, 129.0, 128.2, 127.9, 127.5, 127.1, 126.2, 121.0. ESI MS *m/z*: [M+H]<sup>+</sup> 206.1.

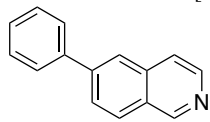

**6-phenylisoquinoline (51)**<sup>33</sup>: The title compound was prepared following a similar procedure as used for compound 50. The crude material was purified by silica gel chromatography (1:10 ethyl acetate/hexanes) to give a clear oil, yield 34%. <sup>1</sup>H NMR (400 MHz, CDCl<sub>3</sub>) δ ppm 9.26 (s, 1H), 8.54 (d, *J* = 6.17, 1H), 8.09 (d, *J* = 7.71, 1H), 7.99 (s, 1H), 7.86 (dd, *J* = 8.62, *J* = 2.15, 1H), 7.72-7.68 (m, 3H), 7.52-7.48 (m, 2H), 7.44-7.40 (m, 1H). ESI MS *m/z*: [M+H]<sup>+</sup> 206.1.

#### Procedure for trapping aldehyde with dihydropyridine intermediate

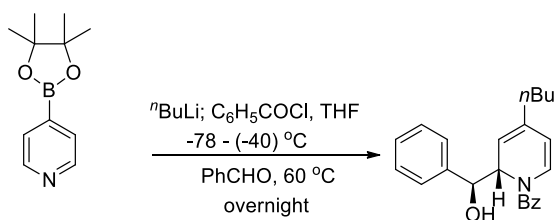

**(±) (4-butyl-2-(hydroxy(phenyl)methyl)pyridin-1(2H)-yl)(phenyl)methanone (52)**: To a stirred solution of 4-pyridineboronic acid pinacol ester (62 mg, 0.3 mmol, recrystallized from CHCl<sub>3</sub> and hexanes) in dry THF (1.5 mL) at -78 °C was added 2.5 M <sup>n</sup>BuLi in hexane (132 μL, 0.26 mmol) dropwise for 5 min under argon atmosphere. The reaction was stirred at -78 °C for 30 min then rt for 15 min. The reaction was degassed by three freeze-pump-thaw cycles then re-cooled to -78 °C. In another vial a THF solution (0.2 mL) of PhCOCl (28.5 μL, 0.33 mmol) was degassed by three freeze-pump-thaw cycles and added slowly (10 minutes) into the reaction mixture. The reaction was stirred at -78 °C for 30 min then warmed to -40 °C and stirred for 6h under argon atmosphere. Dry and degassed benzaldehyde (122 μL, 1.2 mmol) was added into the reaction and the reaction was stirred overnight at 60 °C under argon atmosphere. The reaction was quenched with aq. NH<sub>4</sub>Cl. Brine was added to the reaction mixture and the product was extracted with EtOAc (3 × 10 mL). The organic layer was collected, dried over Na<sub>2</sub>SO<sub>4</sub> and then concentrated in vacuo to afford the crude product. The crude material was purified by silica gel chromatography (30% EtOAc in hexane) to afford the product as yellow oil (81 mg, 78%). <sup>1</sup>H NMR (400 MHz, benzene-d<sub>6</sub>) δ ppm 7.74 – 7.08 (m, 10H), 6.35 (m, 1H), 5.39 – 5.13 (m, 2H), 4.80 (dt, *J* = 6.0, 1.3 Hz, 1H), 4.73 (d, *J* = 9.2 Hz, 1H), 4.35 (m, 1H), 2.03 (td, *J* = 7.2, 4.0 Hz, 2H), 1.43 – 1.19 (m, 4H), 0.88 (t, *J* = 7.2 Hz, 3H). <sup>13</sup>C NMR (100 MHz, benzene-d<sub>6</sub>) δ ppm 172.8, 141.1, 135.3, 133.9, 131.4, 128.4,

(32) Molander, G. A.; Canturk, B.; Kennedy, L. E., *J. Org. Chem.* **2009**, *74*, 973-980

(33) Molander, G. A.; Iannazzo, L., *J. Org. Chem.* **2011**, *76*, 9182-9187.

128.1, 127.8, 127.4, 126.2, 115.2, 110.5, 75.5, 58.1, 33.8, 30.2, 22.2, 13.8. ESI MS  $m/z$ :  $[M+H]^+$  348.2. The relative stereochemistry was determined by X-ray data obtained of the product isolated after reduction followed by ester formation (see compound **51** below).

### Reduction of the dihydropyridine using Pd/C, H<sub>2</sub>

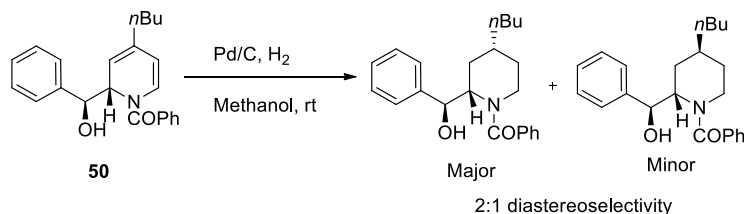

To a stirred solution of compound **52** (68 mg, 0.2 mmol) in dry methanol was added 10% Pd/C (60 mg) under argon atmosphere. The reaction vessel was charged with hydrogen gas (110 psi) using a bomb apparatus and stirred for 48h. The reaction was filtered through Celite and washed with methanol (3 × 5mL). The filtrate was concentrated to afford yellow oil, which was purified by silica gel chromatography (35% EtOAc in hexane) to afford the product as gum (58 mg, 82%), dr 2:1.

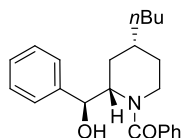

(±) **4-butyl-2-(hydroxy(phenyl)methyl)piperidin-1-yl(phenyl)methanone (53)**: Separated by silica gel flash chromatography (30% EtOAc in hexane), gum, yield 52%, <sup>1</sup>H NMR (400 MHz, Benzene-*d*<sub>6</sub>) δ ppm 7.55 – 6.99 (m, 10H), 4.86 (d, *J* = 8.0 Hz, 1H), 4.42 (d, *J* = 11.1 Hz, 1H), 3.17 – 2.80 (m, 2H), 1.55 – 0.49 (m, 14H). <sup>13</sup>C NMR (100 MHz, Benzene-*d*<sub>6</sub>, mixture of rotamers) δ ppm 173.4, 165.3, 143.1, 138.7, 137.0, 132.5, 130.7, 129.6, 129.3, 128.2, 128.2, 128.0, 127.3, 127.1, 126.8, 80.6, 76.3, 61.3, 60.4, 46.3, 43.3, 36.9, 36.3, 35.9, 35.5, 32.6, 31.9, 31.4, 30.7, 28.7, 22.9, 22.8, 13.9, 13.9. ESI MS  $m/z$ :  $[M+H]^+$  352.2.

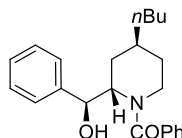

**4-butyl-2-(hydroxy(phenyl)methyl)piperidin-1-yl(phenyl)methanone**: yield 25%, <sup>1</sup>H NMR (400 MHz, acetone-*d*<sub>6</sub>, mixture of rotamers) δ ppm 8.08 (m, 0.3H), 7.68 – 7.05 (m, 9.7H), 5.09 (d, *J* = 10.0 Hz, 1H), 5.01 – 4.90 (m, 0.35H), 4.64 – 4.52 (m, 0.64H), 3.90 (dt, *J* = 11.1, 3.8 Hz, 0.6H), 3.64 (m, 0.4H), 3.43 (td, *J* = 13.5, 2.9 Hz, 0.4H), 3.16 – 2.96 (m, 2.6H), 2.02 – 1.79 (m, 2H), 1.54 – 0.90 (m, 8H), 0.85 (t, *J* = 7.0 Hz, 3H). <sup>13</sup>C NMR (100 MHz, acetone-*d*<sub>6</sub>, mixture of rotamers) δ ppm 176.7, 176.2, 148.9, 148.5, 143.3, 142.4, 134.3, 134.1, 133.6, 133.3, 133.0, 132.9, 132.6, 132.4, 131.0, 131.9, 77.4, 75.9, 65.9, 60.5, 48.8, 42.09, 41.7, 41.6, 37.9, 37.3, 37.3, 37.1, 35.9, 35.8, 35.5, 34.8, 30.4, 28.5, 27.6, 18.5. ESI MS  $m/z$ :  $[M+H]^+$  352.2.

The relative stereochemistry of **53** was determined by converting it to an ester by using Et<sub>3</sub>N, 2-I-PhCOCl, cat DMAP, in DCM. We observed migration of the benzoyl group during that reaction which was shown in the X-ray structure. A single crystal suitable for X-ray crystallography was grown by slow evaporation of ethyl acetate and pentane at room temperature.

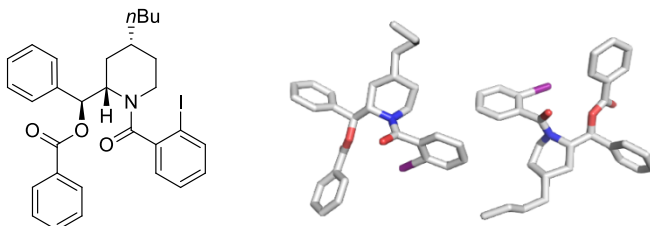

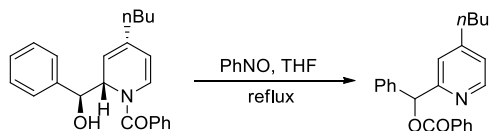

50

**(4-butylpyridin-2-yl)(phenyl)methyl benzoate (54):** To a stirred solution of **52** (27 mg, 0.08 mmol) in THF (1 mL) was added nitrosobenzene (25 mg, 0.24 mmol) this mixture was then heated to 70 °C and stirred at temperature for 30h. At which point the reaction was quenched with water. Brine was added to the reaction mixture and the product was extracted with EtOAc (3 × 5mL). The organic layer was collected, dried over Na<sub>2</sub>SO<sub>4</sub> and then concentrated in vacuo. The crude product was purified by silica gel chromatography (20% EtOAc in hexane) to afford the product as gum (19 mg, 70%). <sup>1</sup>H NMR (400 MHz, CDCl<sub>3</sub>) δ ppm 8.46 (dd, *J* = 5.1, 0.8 Hz, 1H), 8.22 – 8.12 (m, 2H), 7.62 – 7.27 (m, 9H), 7.10 (s, 1H), 7.02 (dd, *J* = 5.1, 1.6 Hz, 1H), 2.66 – 2.54 (m, 2H), 1.70 – 1.54 (m, 2 H), 1.35 (dq, *J* = 14.7, 7.3 Hz, 2H), 0.91 (t, *J* = 7.3 Hz, 3H). <sup>13</sup>C NMR (100 MHz, CDCl<sub>3</sub>) δ ppm 165.5, 159.0, 152.8, 149.3, 139.2, 133.2, 129.9, 128.6, 128.4, 128.1, 127.3, 122.9, 120.9, 78.5, 35.1, 32.3, 22.3, 13.8. ESI MS *m/z*: [M+H]<sup>+</sup> 346.2.

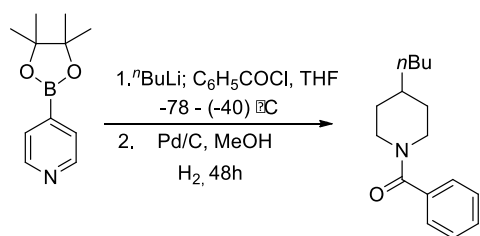

**(4-butylpiperidin-1-yl)(phenyl)methanone (56)<sup>42</sup>:** To a stirred solution of 4-pyridineboronic acid pinacol ester (50 mg, 0.24 mmol) (recrystallized from CHCl<sub>3</sub> and hexanes) in dry THF (1.0 mL) at -78 °C was added <sup>n</sup>BuLi (105 μL, 0.26 mmol, 2.5 M in hexane) dropwise for 5 min under argon atmosphere. The reaction was stirred at -78 °C for 30 min then rt for 15 min. The reaction was degassed by three freeze-pump-thaw cycles then recooled to -78 °C and a degassed THF solution (0.5 mL) of PhCOCl (31 μL, 0.26 mmol) was added slowly (10 minutes) into the reaction mixture. The reaction was stirred at -78 °C for 30 min then warmed to -40 °C and stirred for 6h under argon atmosphere. The reaction mixture was transferred to a flask contain Pd/C (10mol%) and methanol (4mL, dry & degassed). The reaction vial was charged with hydrogen gas (balloon) and stirred for 48h. The reaction was filtered through Celite and washed with methanol (3 × 5mL). The filtrate was concentrated to afford yellow oil, which was purified by silica gel chromatography (25% EtOAc in hexane) to afford the product as gum (41 mg, 70%). <sup>1</sup>H NMR (400 MHz, Benzene-*d*<sub>6</sub>) δ ppm 7.36 (td, *J* = 5.5, 4.9, 2.8 Hz, 2H), 7.07 – 6.96 (m, 3H), 4.79 (m, 1H), 3.71 – 3.23 (m, 1H), 2.50 – 2.20 (m, 2H), 1.43 – 0.53 (m, 14H). <sup>13</sup>C NMR (100 MHz, Benzene-*d*<sub>6</sub>) δ ppm 169.2, 137.2, 128.9, 128.0, 127.2, 47.2, 42.3, 36.6, 35.9, 32.3, 29.3, 28.7, 22.8, 13.9. ESI MS *m/z*: [M+H]<sup>+</sup> 246.2.

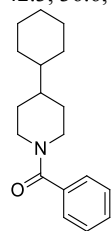

**4-cyclohexylpiperidin-1-yl)(phenyl)methanone (57):** Synthesized using similar procedure as **56**, cyclohexylmagnesium chloride was used in place of <sup>n</sup>BuLi, purified by silica gel chromatography (25% EtOAc in hexane), yellow gum, yield 72%. <sup>1</sup>H NMR (400 MHz, CDCl<sub>3</sub>) δ ppm 7.36 (m, 5H), 4.87 – 4.50 (m, 1H), 3.88 – 3.58 (m, 1H), 2.90 (t, *J* = 12.7 Hz, 1H), 2.66 (m, 1H), 1.82 – 0.89 (m, 16H). <sup>13</sup>C NMR (100 MHz, CDCl<sub>3</sub>) δ ppm 170.1, 149.6, 136.5, 129.3, 128.3, 126.8, 48.4, 42.8, 42.5, 41.9, 33.5, 30.1, 29.1, 26.6, 26.5. ESI MS *m/z*: [M+H]<sup>+</sup> 272.2.

(42) Yu, X.; Yang, T.; Wang, S.; Xu, H.; Gong, H., *Org. Lett.* **2011**, *13*, 2138-2141.

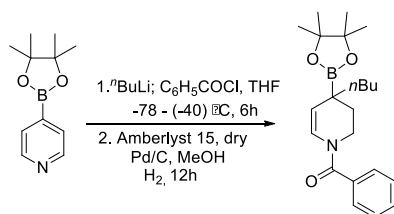

**(4-butyl-4-(4,4,5,5-tetramethyl-1,2-oxaborolan-2-yl)-3,4-dihydropyridin-1(2H)-yl)(phenyl)methanone (58):** To a stirred solution of 4-pyridineboronic acid pinacol ester (100 mg, 0.48 mmol) (recrystallized from  $\text{CHCl}_3$  and hexanes) in dry THF (1 mL) at  $-78^\circ\text{C}$  was added  $n\text{BuLi}$  in hexane (0.21 mL, 0.53 mmol, 2.5 M in hexane) dropwise for 5 min under argon atmosphere. The reaction was stirred at  $-78^\circ\text{C}$  for 30 min then rt for 15 min. The reaction was degassed by three freeze-pump-thaw cycle. The reaction was recooled to  $-78^\circ\text{C}$  and a degassed THF solution (0.5 mL) of  $\text{PhCOCl}$  (55  $\mu\text{L}$ , 0.48 mmol) was added slowly (10 minutes) into the reaction mixture. The reaction was stirred at  $-78^\circ\text{C}$  for 30 min then warmed to  $-40^\circ\text{C}$  and stirred for 6h under argon atmosphere. The reaction mixture was transferred to another flask containing dry amberlyst 15 (145 mg) and stirred for 10 minutes under argon atmosphere. The reaction was settled down for another 10 minutes. In the meantime 10% Pd/C and degassed methanol (4mL) was transferred to another dry flask under argon atmosphere. At this point the reaction mixture was transferred to the flask contain Pd/C and methanol. The reaction flask was washed with dry degassed THF (0.5 mL) and transferred to the flask. Reaction was charged with hydrogen gas (balloon) and stirred at rt for 12h. The reaction was filtered through Celite and washed with methanol ( $3 \times 5\text{mL}$ ). The filtrate was concentrated to afford yellow oil, which was purified by silica gel chromatography (15% EtOAc in hexane) to afford the product as yellow oil (130 mg, 76%).  $^1\text{H}$  NMR (400 MHz,  $\text{CDCl}_3$ , mixture of rotamers)  $\delta$  7.59 – 7.29 (m, 5H), minor rotamer 7.19 (d,  $J = 8.2$  Hz, 0.21 H), major rotamer 6.37 (d,  $J = 8.2$  Hz, 0.69H), minor rotamer 5.11 (d,  $J = 8.2$  Hz, 0.34 H), major rotamer 4.74 (d,  $J = 8.2$  Hz, 0.89H), major rotamer 4.17 (dt,  $J = 13.6, 4.4$  Hz, 0.9H), major & minor rotamer 3.54 (m, 2H), major & minor rotamer 2.23 – 1.09 (m, 20H), major & minor rotamer 0.86 (t,  $J = 6.8$  Hz, 3H).  $^{13}\text{C}$  NMR (100 MHz,  $\text{CDCl}_3$ , mixture of rotamers)  $\delta$  169.1, 168.3, 135.6, 135.1, 130.1, 129.9, 128.4, 127.4, 125.1, 122.5, 117.1, 114.1, 83.4, 45.1, 41.7, 39.9, 38.3, 30.1, 29.6, 28.2, 24.8, 24.6, 24.5, 23.3, 23.1, 14.1, 14.0.  $^{11}\text{B}$  NMR (96 MHz,  $\text{CDCl}_3$ )  $\delta$  ppm 30.02, ESI MS  $m/z$ :  $[\text{M}+\text{H}]^+$  370.2.

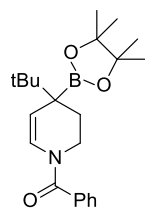

**(4-(tert-butyl)-4-(4,4,5,5-tetramethyl-1,3,2-dioxaborolan-2-yl)-3,4-dihydropyridin-1(2H)-yl)(phenyl)methanone (59):** Followed same procedure as 56,  $^t\text{BuLi}$  was used instead of  $n\text{BuLi}$ . Purified by silica gel chromatography (15% EtOAc in hexane), gum, yield 69%,  $^1\text{H}$  NMR (400 MHz, Benzene- $d_6$ , mixture of rotamers)  $\delta$  ppm minor rotamer 7.72 (m, 0.15 H), major rotamer 7.58 – 7.25 (m, 2H), minor rotamer 7.00 (m, 0.2H), major rotamer 6.95 (m, 3H), major rotamer 6.47 (d,  $J = 8.5$  Hz, 1H), minor rotamer 5.29 (m, 0.2H), major rotamer 4.86 (d,  $J = 8.8$  Hz, 0.79H), major rotamer 4.75 (d,  $J = 13.2$  Hz, 1H), minor rotamer 3.65 (m, 0.19 H), major rotamer 3.36 (td,  $J = 13.2, 2.8$  Hz, 1H), mixture of major and minor rotamer 2.25-1.23 (m, 2H), 0.97 (s, 9H), 0.91 (s, 12H).  $^{13}\text{C}$  NMR (100 MHz, Benzene- $d_6$ , mixture of rotamers)  $\delta$  ppm 168.0, 135.8, 129.6, 128.5, 125.9, 123.7, 111.6, 82.9, 41.2034.3226.8, 26.6, 26.1, 24.7, 24.5, 24.2.  $^{11}\text{B}$  NMR (96 MHz, Benzene- $d_6$ )  $\delta$  ppm 32.99. ESI MS  $m/z$ :  $[\text{M}+\text{H}]^+$  370.2.

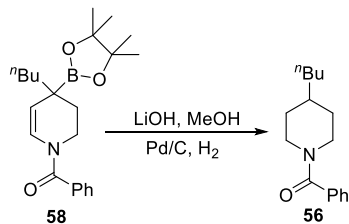

To a stirred solution of compound **58** (20mg, 0.08mmol) in methanol (0.5 mL) was added LiOH (1mg, 0.04) followed by 20 mol% Pd/C under argon atmosphere. The reaction was charged with hydrogen gas (balloon) and stirred overnight (15h). At this point the reaction was filtered through Celite and concentrated in vacuo. The crude material was purified by silica gel column chromatography (25% EtOAc in hexane) to afford **56** (11 mg, 56%).

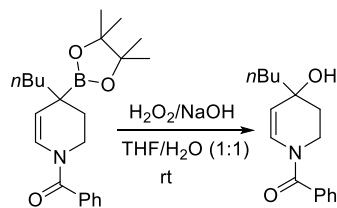

**(4-butyl-4-hydroxy-3,4-dihydropyridin-1(2H)-yl)(phenyl)methanone (60):** To a stirred solution of compound **58** (43 mg, 0.12 mmol) in 1.0 mL of THF was added 30% aq. H<sub>2</sub>O<sub>2</sub> (0.2 mL) and 3N aq. NaOH (0.1 mL) at 0 °C. The reaction was stirred for 24h at room temperature. At this point the reaction was quenched with aq. Na<sub>2</sub>S<sub>2</sub>O<sub>3</sub>. Brine was added to the reaction mixture and extracted with EtOAc (3 × 5mL). The organic layer was collected, dried over Na<sub>2</sub>SO<sub>4</sub> and then concentrated in vacuo, which was purified by silica gel chromatography (40% EtOAc in hexane) to afford the product as gum (25 mg, 78%). <sup>1</sup>H NMR (400 MHz, Benzene-*d*<sub>6</sub>, mixture of rotamers) δ ppm major rotamer 7.34 (d, *J* = 8.4 Hz, 2H), major rotamer 7.09 – 6.84 (m, 3.3H), major rotamer 6.29 (m, 0.7H), major and minor rotamer 4.92-4.15 (m, 1.6H), major and minor rotamer 4.50-3.05 (m, 1.4H), major and minor rotamer 1.84 – 1.01 (m, 9H, including OH proton), major and minor diastereomer 0.91 – 0.66 (m, 3H). <sup>13</sup>C NMR (100 MHz, Benzene-*d*<sub>6</sub>, mixture of rotamers) δ ppm 168.2, 136.6, 135.3, 129.9, 129.3, 111.7, 66.5, 41.8, 37.9, 36.3, 34.3, 29.2, 25.6, 23.2, 22.3, 13.9, 13.7. ESI MS *m/z*: [M+H]<sup>+</sup> 260.2

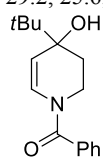

**(4-(tert-butyl)-4-hydroxy-3,4-dihydropyridin-1(2H)-yl)(phenyl)methanone (61):** followed same procedure as for **60**, Purified by silica gel chromatography (40% EtOAc in hexane), gum, yield 75%, <sup>1</sup>H NMR (400 MHz, Benzene-*d*<sub>6</sub>, mixture of rotamers) δ ppm 7.57 – 7.18 (m, 2H), 7.05 – 6.92 (m, 3.3H), 6.29 (m, 0.7H), 4.50 (m, 1.6H), 4.85 (m, 0.34H), 3.16 (m, 1.4H), 1.42 (m, 2H), 1.25 (m, H, OH proton), 0.82 (s, 9H). <sup>13</sup>C NMR (100 MHz, Benzene-*d*<sub>6</sub>, mixture of rotamers) δ ppm 168.3, 135.2, 129.9, 129.4, 128.4, 108.5, 70.5, 37.8, 36.4, 34.7, 29.6, 28.1, 24.6. ESI MS *m/z*: [M+H]<sup>+</sup> 260.2.

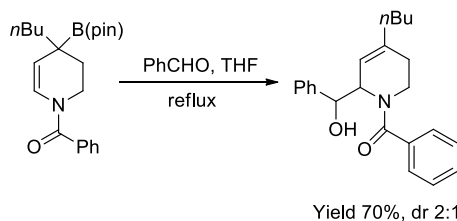

**(4-butyl-2-(hydroxy(phenyl)methyl)-5,6-dihydropyridin-1(2H)-yl)(phenyl)methanone (62):** To a stirred solution of compound **56** (20 mg, 0.05 mmol) in THF was added benzaldehyde (26 μL, 0.25 mmol). The reaction was heated to 70 °C and stirred at temperature for 36h. Water was then added to the reaction mixture and the product was extracted with EtOAc (3 × 5mL). The organic layer was collected, dried over Na<sub>2</sub>SO<sub>4</sub> and then concentrated in vacuo. The crude product was purified by silica gel chromatography (20% EtOAc in hexane) to afford the product as gum (19 mg, 70%). <sup>1</sup>H NMR (400 MHz, Acetone-*d*<sub>6</sub>) major & minor diastereomer δ ppm 7.71 – 7.05 (m, 10H), major 5.40 (t, *J* = 2.9 Hz, 0.76H), 5.17 (m, 0.86H), 4.95 (dd, *J* = 6.9, 4.1 Hz, 0.75H), minor 4.88 (d, *J* = 3.8 Hz, 0.34H), major 4.83 (d, *J* = 4.2 Hz, 0.64H), minor 4.80 (d, *J* = 3.6 Hz, 0.26H), 4.70 (dd, *J* = 8.2, 3.6 Hz, 0.37H), 4.59 (dd, *J* = 13.0, 6.3 Hz, 0.38H), 4.22 (m, 0.38H), major 3.48 (dd, *J* = 13.5, 5.6 Hz, 0.81H), minor 2.99 (td, *J* = 12.5, 4.4 Hz, 0.44H), major 2.71 (td, *J* = 13.1, 3.8 Hz, 0.86H), minor 2.26 (m, 0.46H), 2.14 – 2.07 (m, 0.52H), major 2.01 – 1.90 (m, 3H), 1.71 (dd, *J* = 17.1, 3.8 Hz, 0.8H), ) major & minor diastereomer 1.41 – 1.18 (m, 4H), ) major & minor diastereomer 0.86 (t, *J* = 6.9 Hz, 3H). <sup>13</sup>C NMR (100 MHz, Acetone-*d*<sub>6</sub>) major & minor diastereomer δ ppm 170.9, 168.5, 142.4, 138.0, 137.2, 129.3, 128.7, 128.3, 127.9, 127.8, 127.7, 127.6, 127.4, 127.3, 127.2, 127.1, 126.7, 118.4, 117.9, 74.9, 74.8, 61.1, 60.9, 56.4, 56.3, 41.7, 36.6, 36.4, 35.2, 34.9, 28.1, 27.4, 21.9, 21.8, 13.3, 13.2. ESI MS *m/z*: [M+H]<sup>+</sup> 350.2.

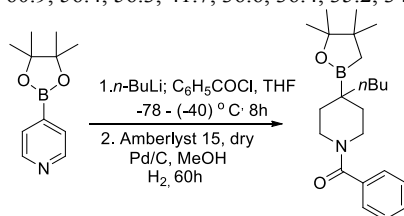

**(4-butyl-4-(4,4,5,5-tetramethyl-1,3,2-dioxaborolan-2-yl)piperidin-1-yl)(phenyl)methanone (63):** To a stirred solution of 4-pyridineboronic acid pinacol ester (100 mg, 0.48 mmol) (recrystallized from CHCl<sub>3</sub> and hexanes) in dry THF (1 mL) at -78 °C was

added <sup>n</sup>BuLi in hexane (0.21 mL, 0.53 mmol, 2.5 M in hexane) dropwise for 5 min under argon atmosphere. The reaction was stirred at -78 °C for 30 min then rt for 15 min. The reaction was degassed by three freeze-pump-thaw cycles then re-cooled to -78 °C and a degassed THF solution (0.5 mL) of PhCOCl (55 μL, 0.48 mmol) added slowly (10 minutes) into the reaction mixture. The reaction was stirred at -78 °C for 30 min then warmed to -40 °C and stirred for an additional 6h. The reaction mixture was then transferred to another flask containing dry amberlyst 15 (145 mg) and stirred for 10 minutes under argon atmosphere. The reaction was allowed to settle for 10 minutes at which point the solvent was transferred into a flask containing 10% Pd/C and degassed methanol (4 mL). The reaction flask was washed with dry degassed THF (0.5 mL) and transferred to the flask. The reaction vessel was then charged with hydrogen gas (balloon) and stirred at rt for 20h. Another 10 mol% of Pd/C was added to the reaction and stirred for 40h. The reaction was filtered through Celite and washed with methanol (3 × 5 mL). The filtrate was concentrated to afford yellow oil, which was purified by silica gel chromatography (15% EtOAc in hexane) to afford the product as gum (122 mg, 69%). <sup>1</sup>H NMR (400 MHz, CDCl<sub>3</sub>) δ ppm 7.35 (s, 5H), 4.55 (d, *J* = 13.3 Hz, 1H), 3.62 (d, *J* = 13.5 Hz, 1H), 2.90 (dt, *J* = 77.6, 12.9 Hz, 2H), 2.12 – 1.75 (m, 2H), 1.41 – 1.00 (m, 20H), 0.85 (t, *J* = 6.9 Hz, 3H). <sup>13</sup>C NMR (100 MHz, CDCl<sub>3</sub>) δ ppm 170.2, 136.5, 129.3, 128.3, 126.8, 83.4, 47.3, 41.7, 39.9, 36.1, 35.1, 34.3, 28.8, 27.7, 23.5, 22.8, 14.1, 13.9. <sup>11</sup>B NMR (96 MHz, CDCl<sub>3</sub>) δ ppm 33.50, ESI MS *m/z*: [M+H]<sup>+</sup> 372.2.

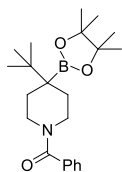

**(4-(tert-butyl)-4-(4,4,5,5-tetramethyl-1,3,2-dioxaborolan-2-yl)piperidin-1-yl)(phenyl)methanone (64):** Purified by silica gel chromatography (25% EtOAc in hexane), gum, yield 74%, <sup>1</sup>H NMR (400 MHz, CDCl<sub>3</sub>) δ ppm 7.34 (m, 5H), 4.68 (d, *J* = 13.6 Hz, 1H), 3.67 (d, *J* = 12.9 Hz, 1H), 2.94 (t, *J* = 13.3 Hz, 1H), 2.79 – 2.56 (m, 1H), 1.90 (d, *J* = 13.0 Hz, 1H), 1.73 (d, *J* = 12.8 Hz, 1H), 1.48 – 1.31 (m, 1H), 1.29 – 1.11 (m, 13H), 0.86 (s, 9H). <sup>13</sup>C NMR (100 MHz, CDCl<sub>3</sub>) δ ppm 170.0, 136.5, 129.2, 128.3, 126.8, 83.5, 47.6, 42.1, 34.2, 33.6, 29.4, 28.5, 27.2, 26.7, 25.1. <sup>11</sup>B NMR (96 MHz, CDCl<sub>3</sub>) δ ppm 34.02, ESI MS *m/z*: [M+H]<sup>+</sup> 372.2.

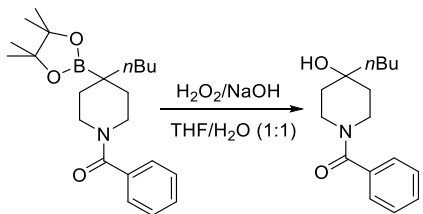

**(4-butyl-4-hydroxypiperidin-1-yl)(phenyl)methanone (65):** To a stirred solution of compound **63** (50 mg, 0.13 mmol) in 1.0 mL of THF/H<sub>2</sub>O (1:1) was added 30% aq. H<sub>2</sub>O<sub>2</sub> (0.2 mL) and 3N aq. NaOH (0.1 mL) at 0 °C. This mixture was then warmed to rt and stirred for 24h. The reaction was then cooled to 0 °C and an additional 30% aq. H<sub>2</sub>O<sub>2</sub> (0.1 mL) and 3N aq. NaOH (0.1 mL) was added. The reaction was stirred for another 40h at rt at which point it was quenched with aq. Na<sub>2</sub>S<sub>2</sub>O<sub>3</sub>. Brine was added to the reaction mixture and the product was extracted with EtOAc (3 × 5 mL). The organic layer was collected, dried over Na<sub>2</sub>SO<sub>4</sub> and then concentrated in vacuo giving the crude product which was purified by silica gel chromatography (40% EtOAc in hexane) to afford the product as gum (30 mg, 86%). <sup>1</sup>H NMR (400 MHz, Chloroform-*d*) δ ppm 7.37 (m, 5H), 4.55 – 4.26 (m, 1H), 3.59 – 3.12 (m, 3H), 1.80 – 1.16 (m, 11H, including OH proton), 1.03 – 0.74 (m, 3H). <sup>13</sup>C NMR (100 MHz, CDCl<sub>3</sub>) δ ppm 170.2, 136.2, 129.5, 128.4, 126.8, 69.9, 43.8, 43.0, 38.3, 37.3, 36.6, 24.9, 23.1, 14.0. ESI MS *m/z*: [M+H]<sup>+</sup> 262.2.

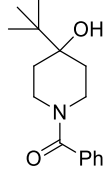

**(4-(tert-butyl)-4-hydroxypiperidin-1-yl)(phenyl)methanone (66):** purified by silica gel chromatography (40% EtOAc/hexane), gum, yield 88%, <sup>1</sup>H NMR (400 MHz, CDCl<sub>3</sub>) δ ppm 7.36 (m, 5H), 4.65 – 4.51 (m, 1H), 3.55 (d, *J* = 13.5 Hz, 1H), 3.34 (t, *J* = 13.0 Hz, 1H), 3.06 (t, *J* = 12.5 Hz, 1H), 1.94 – 1.46 (m, 5H, including OH proton), 0.91 (s, 9H). <sup>13</sup>C NMR (100 MHz, CDCl<sub>3</sub>) δ ppm 170.1, 136.2, 129.4, 128.4, 126.8, 73.8, 43.8, 38.2, 37.4, 31.6, 30.8, 24.8. ESI MS *m/z*: [M+H]<sup>+</sup> 262.2.

### General procedure for SmI<sub>2</sub> mediated cyclization of dihydropyridine intermediate

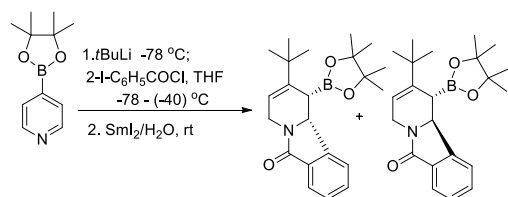

To a stirred solution of 4-pyridineboronic acid pinacol ester (50 mg, 0.24 mmol)(recrystallized from CHCl<sub>3</sub> and hexanes) in dry THF (1 mL) at -78 °C was added *t*BuLi solution in pentane (0.15 mL, 0.26 mmol). The reaction was stirred at -78 °C for 30 min then rt for 15 min at which point the reaction was degassed by three freeze-pump-thaw cycles. The reaction was then recooled to -78 °C. In another vial a THF (0.2 mL) solution of 2-I-PhCOCl (69 mg, 0.26 mmol) was degassed by three freeze-pump-thaw cycles and added slowly (10 minutes) into the reaction mixture. The reaction was stirred at -78 °C for 30 min then warmed to -40 °C and stirred for overnight (15h) at -40 °C. After that the reaction mixture was kept outside at room temperature for 10 minutes. In the meantime SmI<sub>2</sub> solution in THF with water was prepared. In a dry reaction flask 0.1 M SmI<sub>2</sub> solution (7.2 mL, 0.72 mmol) in THF was transferred followed by addition of degassed water (0.1 mL, 5.52 mmol) and stirred for 5 minutes under an inert atmosphere of argon. The reaction mixture was then transferred into the SmI<sub>2</sub> mixture via cannula, dropwise with constant stirring. Extra 0.1 M SmI<sub>2</sub> solution (3- 4 equivalent) in THF was added to the reaction mixture to maintain the blue color. The reaction was stirred for an additional 30 minutes at which point it was quenched with water. The reaction mixture was filtered through Celite. Brine was added to the filtrate and the product was extracted with EtOAc (3 × 15mL). The organic layer was collected, dried over Na<sub>2</sub>SO<sub>4</sub> and then concentrated in vacuo to give a yellow gum. This crude material was purified by silica gel chromatography (30% EtOAc in hexane) to afford the product as white solid as a mixture of diastereomer (72 mg, 82%), *dranti: syn* (2:1). The diastereomers are separated by preparative TLC (25% EtOAc in hexane).

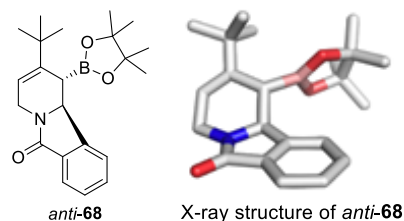

**2-(*tert*-butyl)-1-(4,4,5,5-tetramethyl-1,3,2-dioxaborolan-2-yl)-1,10b-dihydropyrido[2,1-*a*]isoindol-6(4H)-one (*anti*-68):** The relative stereochemistry was confirmed by X-ray crystallography. A single crystal suitable for X-ray crystallography was grown by slow evaporation of ethyl acetate and pentane at room temperature. Purified by preparative TLC (25% EtOAc in hexane), white solid, mp 190-192 °C, <sup>1</sup>H NMR (400 MHz, CDCl<sub>3</sub>) δ ppm 7.82 (dd, *J* = 7.5, 1.2 Hz, 1H), 7.69 (dd, *J* = 7.6, 1.0 Hz, 1H), 7.51 (td, *J* = 7.5, 1.2 Hz, 1H), 7.43 (t, *J* = 7.4 Hz, 1H), 5.79 (dt, *J* = 5.8, 1.9 Hz, 1H), 4.68 – 4.54 (m, 2H), 3.75 (dt, *J* = 17.6, 2.4 Hz, 1H), 2.14 – 2.05 (m, 1H), 1.40 (s, 6H), 1.35 (s, 6H), 1.05 (s, 9H). <sup>13</sup>C NMR (100 MHz, CDCl<sub>3</sub>) δ ppm 166.1, 146.8, 144.4, 132.2, 131.2, 127.9, 123.5, 122.3, 116.2, 84.2, 57.3, 38.5, 36.1, 30.4, 29.2 (carbon attached to boron), 25.6, 24.8. <sup>11</sup>B NMR (96 MHz, CDCl<sub>3</sub>) δ ppm 33.18. ESI MS *m/z*: [M+H]<sup>+</sup> 368.2.

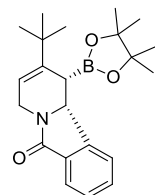

**2-(*tert*-butyl)-1-(4,4,5,5-tetramethyl-1,3,2-dioxaborolan-2-yl)-1,10b-dihydropyrido[2,1-*a*]isoindol-6(4H)-one (*syn*-68):** Purified by preparative TLC (25% EtOAc in hexane), white solid, mp 138 -140 °C, <sup>1</sup>H NMR (400 MHz, CDCl<sub>3</sub>) δ ppm 7.83 (dt, *J* = 7.4, 1.0 Hz, 1H), 7.60 – 7.47 (m, 2H), 7.44 (td, *J* = 7.4, 1.2 Hz, 1H), 5.65 (dd, *J* = 4.0, 2.5 Hz, 1H), 4.58 (dd, *J* = 18.4, 2.5 Hz, 1H), 4.46 (d, *J* = 4.6 Hz, 1H), 3.94 (ddt, *J* = 18.4, 4.0, 1.2 Hz, 1H), 2.69 (d, *J* = 4.5 Hz, 1H), 1.12 (s, 9H), 0.75 (s, 6H), 0.71 (s, 6H). <sup>13</sup>C NMR (100 MHz, CDCl<sub>3</sub>) δ ppm 167.5, 145.3, 144.7, 134.2, 130.7, 128.2, 123.2, 123.1, 113.4, 83.2, 57.8, 40.5, 35.9, 28.9, 27.4 (carbon attached to boron show weak broad peak), 24.4, 24.2. <sup>11</sup>B NMR (96 MHz, CDCl<sub>3</sub>) δ ppm 32.32. ESI MS *m/z*: [M+H]<sup>+</sup> 368.2.

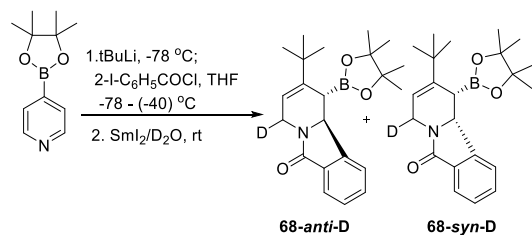

Synthesized using same procedure as **68** except H<sub>2</sub>O was replaced by D<sub>2</sub>O. The crude material was purified by silica gel chromatography (30% EtOAc in hexane), yield 78%, *dranti: syn* (2:1).

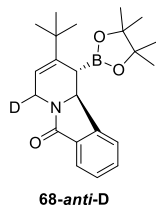

Purified by preparative TLC (25% EtOAc in hexane), white solid, mp 195-197 °C, <sup>1</sup>H NMR (400 MHz, CDCl<sub>3</sub>) δ ppm 7.82 (d, *J* = 7.6 Hz, 1H), 7.73 – 7.64 (m, 1H), 7.51 (td, *J* = 7.5, 1.3 Hz, 1H), 7.43 (t, *J* = 7.4 Hz, 1H), 5.78 (p, *J* = 1.9 Hz, 1H), 4.58 (d, *J* = 9.1 Hz, 1H), 4.60, 3.73 (m, 1H), 2.09 (dt, *J* = 9.2, 2.4 Hz, 1H), 1.40 (s, 6H), 1.35 (s, 6H) 1.04 (s, 9H). <sup>13</sup>C NMR (100 MHz, CDCl<sub>3</sub>) δ ppm 166.1, 146.9, 144.5, 132.2, 131.2, 127.9, 123.5, 122.3, 116.1, 84.2, 57.2, 38.4, 38.2, 37.9, 36.0, 30.4, 28.9 (boron attached to the carbon broad peak), 25.6, 24.8. <sup>11</sup>B NMR (96 MHz, CDCl<sub>3</sub>) δ ppm 33.33. ESI MS *m/z*: [M+H]<sup>+</sup> 369.3.

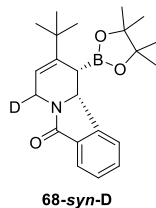

Purified by preparative TLC (25% EtOAc in hexane), white solid, mp 125-127 °C, <sup>1</sup>H NMR (400 MHz, Acetone-d<sub>6</sub>) δ ppm 7.70 – 7.64 (m, 2H), 7.57 – 7.52 (td, *J* = 7.2, 1.6 Hz), 7.49 – 7.44 (1H, m), 5.64 (m, 1H), 4.50 (d, *J* = 4.4 Hz, 1H), 4.41, 3.80 (m, 1H), 2.77 (dd, *J* = 4.4, 1.2 Hz, 1H), 1.10 (s, 9H), 0.72 (s, 6H), 0.69 (s, 6H). <sup>13</sup>C NMR (100 MHz, Acetone-d<sub>6</sub>) δ ppm 166.5, 145.5, 145.1, 134.5, 130.4, 128.0, 123.7, 122.4, 113.3, 82.7, 57.4, 40.0, 39.8, 39.6, 35.6, 28.5, 23.9, 23.7 (carbon attached to boron is not observed). <sup>11</sup>B NMR (96 MHz, Acetone-d<sub>6</sub>) δ ppm 31.88. ESI MS *m/z*: [M+H]<sup>+</sup> 369.3.

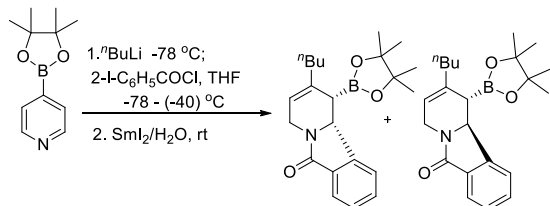

Synthesized using same procedure as **68**, The crude material was purified by silica gel chromatography (30% EtOAc in hexane), yield 76%, *dranti: syn* (2:1).



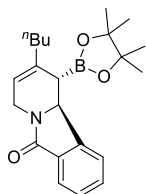

**2-butyl-1-(4,4,5,5-tetramethyl-1,3,2-dioxaborolan-2-yl)-1,10b-dihydropyrido[2,1-a]isoindol-6(4H)-one (*anti*-69):** Purified by preparative TLC (25% EtOAc in hexane, gum,  $^1\text{H}$  NMR (400 MHz, Acetone- $d_6$ )  $\delta$  ppm 7.72 (dd,  $J = 7.5$ , 1.2 Hz, 1H), 7.66 – 7.55 (m, 2H), 7.49 (td,  $J = 7.2$ , 1.5 Hz, 1H), 5.63 (m, 1H), 4.63 – 4.55 (d,  $J = 10.8$  Hz, 1H), 4.55 – 4.45 (m, 1H), 3.72 (ddt,  $J = 18.0$ , 4.4, 2.1 Hz, 1H), 2.17 – 2.08 (m, 2H), 1.78 (dd,  $J = 10.9$ , 3.7 Hz, 1H), 1.58 – 1.14 (m, 16H), 0.85 (t,  $J = 7.1$  Hz, 3H).  $^{13}\text{C}$  NMR (100 MHz, Acetone- $d_6$ )  $\delta$  ppm 165.0, 146.6, 135.3, 132.5, 131.0, 128.0, 122.9, 122.3, 116.9, 84.2, 56.3, 38.4, 36.8, 29.7, 23.9, 23.4, 13.3 (carbon attached to boron is not observed).  $^{11}\text{B}$  NMR (96 MHz, Acetone- $d_6$ )  $\delta$  ppm 32.82. ESI MS  $m/z$ :  $[\text{M}+\text{H}]^+$  368.2.

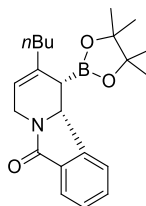

**2-butyl-1-(4,4,5,5-tetramethyl-1,3,2-dioxaborolan-2-yl)-1,10b-dihydropyrido[2,1-a]isoindol-6(4H)-one (*syn*-69):** Purified by preparative TLC (25% EtOAc in hexane), gum,  $^1\text{H}$  NMR (400 MHz, Acetone- $d_6$ )  $\delta$  ppm  $\delta$  7.68 (d,  $J = 7.4$  Hz, 1H), 7.62 – 7.49 (m, 2H), 7.46 (td,  $J = 7.3$ , 1.1 Hz, 1H), 5.55 (td,  $J = 3.2$ , 1.5 Hz, 1H), 4.56 (d,  $J = 5.1$  Hz, 1H), 4.44 (dt,  $J = 17.4$ , 3.0, 2.6, 1.3 Hz, 1H), 3.75 (ddt,  $J = 19.4$ , 4.5, 2.0 Hz, 1H), 2.53 (d,  $J = 5.5$  Hz, 1H), 2.16 – 2.06 (m, 2H), 1.54 – 1.25 (m, 4H), 0.91 (t,  $J = 7.3$  Hz, 3H), 0.78 (s, 6H), 0.69 (s, 6H).  $^{13}\text{C}$  NMR (100 MHz, Acetone- $d_6$ )  $\delta$  ppm 166.2, 145.4, 136.6, 134.4, 130.4, 127.8, 123.1, 122.4, 115.6, 82.7, 56.1, 39.4, 36.9, 29.7, 23.9, 23.4, 22.2, 13.3 (carbon attached to boron is not observed).  $^{11}\text{B}$  NMR (96 MHz, Acetone- $d_6$ )  $\delta$  ppm 30.90. ESI MS  $m/z$ :  $[\text{M}+\text{H}]^+$  368.2.

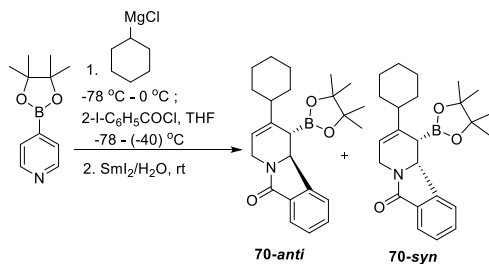

To a stirred solution of 4-pyridineboronic acid pinacol ester (50 mg, 0.24 mmol)(recrystallized from  $\text{CHCl}_3$  and hexanes) in dry THF (1.0 mL) at  $-78\text{ }^\circ\text{C}$  was added 1.8 M cyclohexylmagnesium chloride (145  $\mu\text{L}$ , 0.26 mmol) dropwise for 5 min under an inert atmosphere of argon. The reaction was stirred at  $-78\text{ }^\circ\text{C}$  for 10 min then rt for 2 h. The reaction was degassed by three freeze-thaw cycle. The reaction was recooled to  $-78\text{ }^\circ\text{C}$ . In another vial a THF (0.2 mL) solution of 2-I-PhCOCl (69 mg, 0.26 mmol) was degassed by three freeze-thaw cycle and added slowly (10 minutes) into the reaction mixture. The reaction was stirred at  $-78\text{ }^\circ\text{C}$  for 30 min then warmed to  $-40\text{ }^\circ\text{C}$  and stirred for overnight (15h) under an inert atmosphere of argon. After that the reaction mixture was kept outside at room temperature for 10 minutes. In the meantime  $\text{SmI}_2$  solution in THF with water was prepared. In a dry reaction flask 0.1 M  $\text{SmI}_2$  solution (7.2 mL, 0.72 mmol) in THF was transferred followed by addition of degassed water (0.1 mL, 5.52 mmol) and stirred for 5 minutes under an inert atmosphere of argon. The reaction mixture was transferred into the  $\text{SmI}_2$  mixture by cannula dropwise with constant stirring under an inert atmosphere of argon. Extra 0.1 M  $\text{SmI}_2$  solution (3- 4 equivalent) in THF was added to the reaction mixture to persist the blue color. The reaction was stirred for another 30 minutes and then quench with water. The reaction mixture was filtered through Celite. Brine was added to the reaction mixture and extracted with EtOAc (3  $\times$  15mL). The organic layer was collected, dried over  $\text{Na}_2\text{SO}_4$  and then concentrated in vacuo to give yellow gum. The crude product was purified by Silica gel chromatography (30% EtOAc in hexane) to afford the product as gum as a mixture of diastereomer (75 mg, 80%, dr 2:1). The diastereomers are separated by preparative TLC (25% EtOAc in hexane).

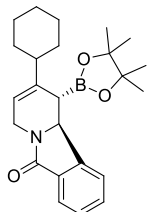

**2-cyclohexyl-1-(4,4,5,5-tetramethyl-1,3,2-dioxaborolan-2-yl)-1,10b-dihydropyrido[2,1-a]isoindol-6(4H)-one (*anti*-70):** Purified by preparative TLC 25% EtOAc in hexane, mp 230-232 °C, <sup>1</sup>H NMR (400 MHz, CDCl<sub>3</sub>) δ ppm 7.86 (dt, *J* = 7.4, 1.1 Hz, 1H), 7.54 – 7.34 (m, 3H), 5.56 (dt, *J* = 4.8, 2.5 Hz, 1H), 4.74 – 4.54 (m, 2H), 3.83 (ddt, *J* = 18.2, 3.0, 1.7 Hz, 1H), 2.01 (dd, *J* = 10.0, 3.1 Hz, 1H), 1.94 – 1.64 (m, 7H), 1.41 (s, 12H), 1.34 – 0.70 (m, 4H). <sup>13</sup>C NMR (100 MHz, CDCl<sub>3</sub>) δ ppm 166.3, 146.5, 140.2, 132.4, 130.9, 128.0, 123.6, 121.9, 114.6, 84.2, 56.7, 44.1, 39.0, 33.5, 31.4, 26.8, 26.7, 26.3, 25.5, 25.3 (carbon attached to boron is not observed). <sup>11</sup>B NMR (96 MHz, CDCl<sub>3</sub>) δ ppm 32.46. ESI MS *m/z*: [M+H]<sup>+</sup> 394.3.

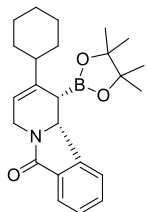

**2-cyclohexyl-1-(4,4,5,5-tetramethyl-1,3,2-dioxaborolan-2-yl)-1,10b-dihydropyrido[2,1-a]isoindol-6(4H)-one (*syn*-70):** separated by preparative TLC 25% EtOAc in hexane, solid, mp 130-132 °C, <sup>1</sup>H NMR (400 MHz, CDCl<sub>3</sub>) δ ppm 7.85 – 7.78 (m, 1H), 7.58 – 7.35 (m, 3H), 5.53 (t, *J* = 2.8 Hz, 1H), 4.56 (ddd, *J* = 18.4, 2.7, 1.3 Hz, 1H), 4.47 (d, *J* = 4.8 Hz, 1H), 3.93 – 3.82 (m, 1H), 2.50 (d, *J* = 4.8 Hz, 1H), 1.97 – 1.62 (m, 5H), 1.43 – 1.21 (m, 5H), 0.75 (s, 6H), 0.70 (s, 6H). <sup>13</sup>C NMR (100 MHz, CDCl<sub>3</sub>) δ ppm 167.4, 144.9, 141.9, 134.2, 130.7, 128.1, 123.1, 122.7, 114.4, 83.1, 57.0, 45.6, 40.1, 31.9, 29.5 (carbon attached to boron show weak broad peak), 26.6, 26.2, 24.3, 24.0. <sup>11</sup>B NMR (96 MHz, CDCl<sub>3</sub>) δ ppm 31.90. ESI MS *m/z*: [M+H]<sup>+</sup> 394.3.

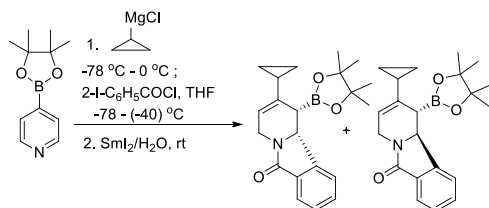

Synthesized using same procedure as **71**, The crude material was purified by silica gel chromatography (30% EtOAc in hexane), yield 64%, *dranti*: *syn* (2:1).

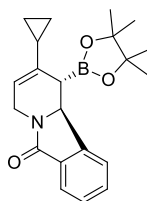

**2-cyclopropyl-1-(4,4,5,5-tetramethyl-1,3,2-dioxaborolan-2-yl)-1,10b-dihydropyrido[2,1-a]isoindol-6(4H)-one (*anti*-71):** separated by preparative TLC 25% EtOAc in hexane, solid, mp 191-192 °C, <sup>1</sup>H NMR (400 MHz, Acetone-*d*<sub>6</sub>) δ ppm 7.71 (dt, *J* = 7.5, 1.1 Hz, 1H), 7.68 – 7.56 (m, 2H), 7.53 – 7.45 (m, 1H), 5.53 (tt, *J* = 4.2, 1.8 Hz, 1H), 4.67 – 4.53 (m, 1H), 4.55 – 4.33 (m, 1H), 3.78 – 3.59 (m, 1H), 1.94 – 1.76 (m, 1H), 1.41 (s, 12H), 1.38 (m, 1H), 0.79 – 0.47 (m, 3H), 0.46 – 0.25 (m, 1H). <sup>13</sup>C NMR (100 MHz, Acetone-*d*<sub>6</sub>) δ ppm 165.0, 146.6, 136.9, 132.5, 131.0, 128.0, 122.9, 122.4, 115.0, 84.1, 56.4, 38.3, 24.7, 24.3, 15.9, 6.4, 5.1 (carbon attached to boron is not observed). <sup>11</sup>B NMR (96 MHz, Acetone-*d*<sub>6</sub>) δ ppm 32.64. ESI MS *m/z*: [M+H]<sup>+</sup> 352.2.

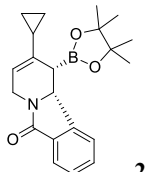

**2-cyclopropyl-1-(4,4,5,5-tetramethyl-1,3,2-dioxaborolan-2-yl)-1,10b-dihydropyrido[2,1-a]isoindol-6(4H)-one (*syn*-71):** separated by preparative TLC 25% EtOAc in hexane, solid, mp 120-122 °C, <sup>1</sup>H NMR (400 MHz, CDCl<sub>3</sub>) δ ppm 7.81 (dt, *J* = 7.4, 1.0 Hz, 1H), 7.55 – 7.33 (m, 3H), 5.54 – 5.48 (m, 1H), 4.63 – 4.47 (m, 2H), 3.85 (dt, *J* = 18.2, 2.0 Hz, 1H), 2.40 (d,

$J = 4.5$  Hz, 1H), 1.28 – 1.22 (m, 1H), 0.79 (s, 6H), 0.70 (s, 6H), 0.67 – 0.57 (m, 3H), 0.48 – 0.40 (m, 1H).  $^{13}\text{C}$  NMR (100 MHz,  $\text{CDCl}_3$ )  $\delta$  ppm 167.3, 144.8, 137.3, 134.0, 130.7, 128.2, 123.2, 122.7, 113.9, 83.2, 56.6, 39.9, 29.7 (carbon attached to boron show weak broad peak), 24.4, 23.9, 17.1, 5.9, 4.1.  $^{11}\text{B}$  NMR (96 MHz,  $\text{CDCl}_3$ )  $\delta$  ppm 31.28. ESI MS  $m/z$ :  $[\text{M}+\text{H}]^+$  352.2.

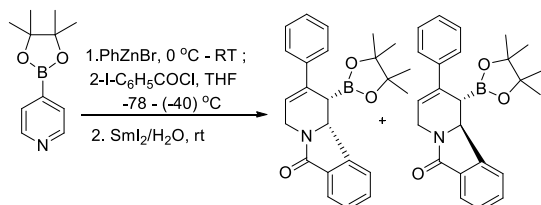

To a stirred solution of 4-pyridineboronic acid pinacol ester (50 mg, 0.24 mmol) (recrystallized from  $\text{CHCl}_3$  and hexanes) in dry THF (0.5 mL) at  $0^\circ\text{C}$  was added a solution of phenylzinc bromide in THF (650  $\mu\text{L}$ , 0.26 mmol, 0.4M) dropwise for 5 min under argon atmosphere. The reaction was stirred at  $0^\circ\text{C}$  for 20 min then rt for 24 h under argon atmosphere. The reaction was degassed by three freeze-pump-thaw cycles and then re-cooled to  $-78^\circ\text{C}$ . In another vial a THF (0.2 mL) solution of 2-I-PhCOCl (69 mg, 0.26 mmol) was degassed by three freeze-pump-thaw cycles and added slowly (10 minutes) into the reaction mixture. The reaction was stirred at  $-78^\circ\text{C}$  for 30 min then warmed to  $-40^\circ\text{C}$  and stirred for overnight (15h) under argon atmosphere. After that the reaction mixture was kept outside at room temperature for 5 minutes. In the meantime  $\text{SmI}_2$  solution in THF with water was prepared. In a dry reaction flask 0.1 M  $\text{SmI}_2$  solution (7.2 mL, 0.72 mmol) in THF was transferred followed by addition of degassed water (0.1 mL, 5.52 mmol) and stirred for 5 minutes under an inert atmosphere of argon. The reaction mixture was transferred into the  $\text{SmI}_2$  mixture via cannula dropwise with constant stirring under argon atmosphere. Extra 0.1 M  $\text{SmI}_2$  solution (3 - 4 equivalents) in THF was added to the reaction mixture to maintain the blue color. The reaction was stirred for another 30 minutes at which point it was quenched with water. The reaction mixture was filtered through Celite. Brine was added to the filtrate and the product was extracted with EtOAc ( $3 \times 15\text{mL}$ ). The organic layer was collected, dried over  $\text{Na}_2\text{SO}_4$  and then concentrated in vacuo to give yellow gum, which was purified by silica gel chromatography (30% EtOAc in hexane) to afford the product as white solid as a mixture of diastereomer (52 mg, 56%, dr 1:1). The diastereomers are separated by preparative TLC (25% EtOAc in hexane).

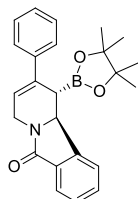

**2-phenyl-1-(4,4,5,5-tetramethyl-1,3,2-dioxaborolan-2-yl)-1,10b-dihydropyrido[2,1-a]isoindol-6(4H)-one**

**(anti-72):** Purified by preparative TLC (25% EtOAc in hexane), mp  $200\text{--}202^\circ\text{C}$ ,  $^1\text{H}$  NMR (400 MHz, Acetone- $d_6$ )  $\delta$  ppm  $\delta$  7.74 – 7.47 (m, 6H), 7.39 – 7.24 (m, 3H), 6.26 (t,  $J = 3.3$  Hz, 1H), 4.78 – 4.73 (m, 1H), 4.71 – 4.62 (m, 1H), 4.06 – 3.91 (m, 1H), 3.18 – 3.04 (m, 1H), 0.71 (s, 6H), 0.63 (s, 6H).  $^{13}\text{C}$  NMR (100 MHz, Acetone- $d_6$ )  $\delta$  ppm 166.2, 145.2, 140.9, 136.0, 134.3, 130.6, 128.3, 128.1, 127.2, 125.5, 123.4, 122.6, 118.8, 82.9, 56.2, 39.9, 23.7, 23.3.  $^{11}\text{B}$  NMR (96 MHz, Acetone- $d_6$ )  $\delta$  ppm 31.40. ESI MS  $m/z$ :  $[\text{M}+\text{H}]^+$  388.2.

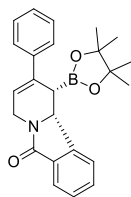

**2-phenyl-1-(4,4,5,5-tetramethyl-1,3,2-dioxaborolan-2-yl)-1,10b-dihydropyrido[2,1-a]isoindol-6(4H)-one** (*syn-*

**72):** purified by preparative TLC (25% EtOAc in hexane), gum,  $^1\text{H}$  NMR (400 MHz, Acetone- $d_6$ )  $\delta$  ppm 7.77 – 7.66 (m, 2H), 7.63 – 7.46 (m, 4H), 7.42 – 7.32 (m, 2H), 7.32 – 7.22 (m, 1H), 6.26 (t,  $J = 3.3$  Hz, 1H), 4.76 (d,  $J = 4.9$  Hz, 1H), 4.72 – 4.62 (m, 1H), 3.99 (dtd,  $J = 19.5, 2.7, 1.1$  Hz, 1H), 3.18 – 3.08 (m, 1H), 0.71 (s, 6H), 0.63 (s, 6H).  $^{13}\text{C}$  NMR (100 MHz, Acetone- $d_6$ )  $\delta$  ppm 166.2, 145.2, 140.9, 135.9, 134.3, 130.6, 128.3, 128.1, 127.2, 125.5, 123.4, 122.6, 118.8, 82.9, 56.2, 39.9, 23.7, 23.3 (carbon attached to boron is not observed).  $^{11}\text{B}$  NMR (96 MHz,  $\text{CDCl}_3$ )  $\delta$  ppm 32.21. ESI MS  $m/z$ :  $[\text{M}+\text{H}]^+$  388.2.

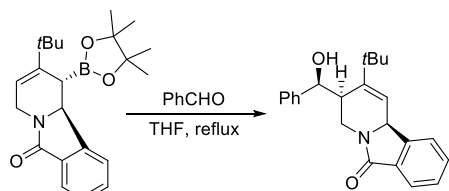

**68 (anti)**

To a stirred solution of compound **68(anti)** (25 mg, 0.07 mmol) in dry THF (0.2 mL) was added degassed benzaldehyde (40  $\mu$ L, 0.35 mmol) under argon atmosphere. The reaction was heated to 70 °C and stirred at temperature for 24h. Upon completion the reaction was quenched with water. Brine was added to the reaction mixture and the product was extracted with EtOAc (3  $\times$  10mL). The organic layer was collected, dried over Na<sub>2</sub>SO<sub>4</sub> and then concentrated in vacuo giving the crude product which was purified by silica gel chromatography (25% EtOAc in hexane) to afford the product as white solid (20 mg, 84%).

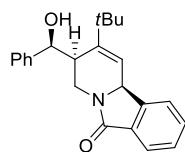

**2-(tert-butyl)-3-hydroxy(phenyl)methyl-3,4-dihydropyrido[2,1-a]isoindol-6(10bH)-one (74):** Based on crude NMR dr 18:1, Purified by silica gel chromatography (25% EtOAc in hexane), white solid, yield 84%, mp 205-206 °C, <sup>1</sup>H NMR (400 MHz, CDCl<sub>3</sub>)  $\delta$  ppm 7.80 (dt,  $J$  = 7.6, 1.0 Hz, 1H), 7.65 – 7.08 (m, 8H), 6.16 (d,  $J$  = 2.0 Hz, 1H), 5.52 – 5.36 (m, 1H), 5.32 (t,  $J$  = 3.1 Hz, 1H), 3.83 (dd,  $J$  = 13.6, 2.5 Hz, 1H), 3.58 (ddd,  $J$  = 13.5, 7.9, 0.9 Hz, 1H), 3.08 (dt,  $J$  = 8.0, 2.9 Hz, 1H), 2.41 (d,  $J$  = 3.0 Hz, 1H), 1.10 (s, 9H); <sup>13</sup>C NMR (100 MHz, CDCl<sub>3</sub>)  $\delta$  ppm 168.4, 149.0, 145.5, 142.8, 132.6, 131.4, 128.6, 128.0, 127.6, 125.7, 123.5, 122.9, 121.7, 75.2, 58.0, 41.7, 38.1, 36.4, 29.9. ESI MS  $m/z$ : [M-H<sub>2</sub>O] 330.2.

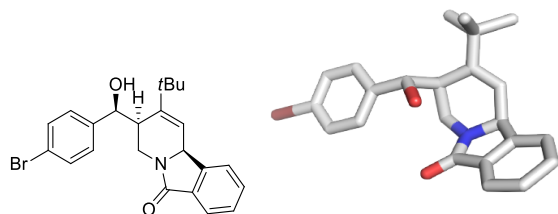

**4-bromophenyl(hydroxy)methyl-2-(tert-butyl)-3,4-dihydropyrido[2,1-a]isoindol-6(10bH)-one:** The relative stereochemistry was determined by X-ray crystallography. A single crystal suitable for X-ray crystallography was grown by slow evaporation of ethyl acetate and pentane at room temperature. Based on crude NMR dr 16:1, Purified by silica gel chromatography (25% EtOAc in hexane), solid, mp 229-230 °C, yield 75%, <sup>1</sup>H NMR (400 MHz, CDCl<sub>3</sub>)  $\delta$  ppm 7.77 (d,  $J$  = 7.5 Hz, 1H), 7.63 – 7.13 (m, 7H), 6.14 (d,  $J$  = 2.0 Hz, 1H), 5.34 (d,  $J$  = 2.2 Hz, 1H), 5.24 (t,  $J$  = 3.2 Hz, 1H), 3.75 (dd,  $J$  = 13.6, 2.7 Hz, 1H), 3.55 (dd,  $J$  = 13.5, 7.7 Hz, 1H), 3.01 (dt,  $J$  = 6.9, 3.0 Hz, 1H), 2.58 (d,  $J$  = 3.7 Hz, 1H), 1.07 (s, 9H); <sup>13</sup>C NMR (100 MHz, CDCl<sub>3</sub>)  $\delta$  ppm 168.3, 148.7, 145.3, 141.7, 132.5, 131.6, 131.5, 128.1, 127.5, 123.5, 123.1, 121.6, 121.4, 74.4, 57.9, 41.7, 38.0, 36.4, 29.7. ESI MS  $m/z$ : [M+H]<sup>+</sup> 426.1.

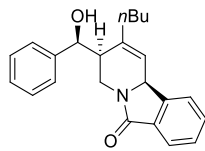

**2-butyl-3-((S)-hydroxy(phenyl)methyl)-3,4-dihydropyrido[2,1-a]isoindol-6(10bH)-one (75) :** Based on crude NMR dr 14:1, by silica gel chromatography (25% EtOAc in hexane), solid, mp 203-205 °C, yield 76%, <sup>1</sup>H NMR (400 MHz, CDCl<sub>3</sub>)  $\delta$  ppm 7.77 (dt,  $J$  = 7.6, 1.0 Hz, 1H), 7.57 – 7.24 (m, 8H), 5.98 (m, 1H), 5.30 (m, 1H), 4.99 (m, 1H), 3.99 (dd,  $J$  = 13.5, 7.0 Hz, 1H), 3.36 (dd,  $J$  = 13.5, 10.0 Hz, 1H), 2.75 (m, 1H), 2.39 – 2.09 (m, 2H), 1.85 (d,  $J$  = 2.5 Hz, 1H), 1.53 – 1.09 (m, 4H), 0.86 (t,  $J$  = 7.3 Hz, 3H); <sup>13</sup>C NMR (100 MHz, CDCl<sub>3</sub>)  $\delta$  ppm 167.1, 144.4, 141.3, 138.8, 132.3, 131.4, 128.6, 128.1, 127.6, 125.3, 123.7, 122.9, 121.8, 71.1, 57.5, 43.4, 35.7, 34.1, 29.9, 22.5, 13.9. ESI MS  $m/z$ : [M+H]<sup>+</sup> 348.2.

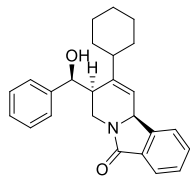

**2-cyclohexyl-3-((S)-hydroxy(phenyl)methyl)-3,4-dihydropyrido[2,1-a]isoindol-6(10bH)-one (76)** : Based on crude NMR dr 15:1, Purified by silica gel chromatography (25% EtOAc in hexane), solid, mp 190-193 °C, yield 77%, <sup>1</sup>H NMR (400 MHz, CDCl<sub>3</sub>) δ 7.77 (dt, *J* = 7.6, 1.0 Hz, 1H), 7.65 – 7.18 (m, 8H), 5.95 (dd, *J* = 2.8, 1.2 Hz, 1H), 5.28 (d, *J* = 2.8 Hz, 1H), 5.01 (dd, *J* = 3.0, 1.7 Hz, 1H), 3.95 (dd, *J* = 13.5, 7.2 Hz, 1H), 3.39 (dd, *J* = 13.5, 9.3 Hz, 1H), 2.88 (m, 1H), 2.12 (m, 1H), 1.93 (d, *J* = 2.0 Hz, 1H), 1.90 – 1.65 (m, 4H), 1.43 – 0.65 (m, 6H); <sup>13</sup>C NMR (100 MHz, CDCl<sub>3</sub>) δ ppm 167.1, 144.5, 143.8, 141.4, 132.4, 131.4, 128.6, 128.1, 127.6, 125.3, 123.7, 121.8, 121.1, 71.4, 57.5, 42.9, 40.2, 36.0, 33.7, 31.0, 26.8, 26.5, 26.3. ESI MS *m/z*: [M+H]<sup>+</sup> 374.2.

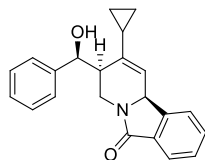

**2-cyclopropyl-3-((R)-hydroxy(phenyl)methyl)-3,4-dihydropyrido[2,1-a]isoindol-6(10bH)-one (77)** : Based on crude NMR dr 12:1, Purified by silica gel chromatography (25% EtOAc in hexane), solid, mp 228 -230 °C, yield 74%, <sup>1</sup>H NMR (400 MHz, CDCl<sub>3</sub>) δ ppm 7.74 (dt, *J* = 7.5, 1.0 Hz, 1H), 7.59 – 7.25 (m, 8H), 5.89 (t, *J* = 1.8 Hz, 1H), 5.58 (d, *J* = 2.7 Hz, 1H), 4.96 (dd, *J* = 3.4, 1.9 Hz, 1H), 4.00 (dd, *J* = 13.6, 7.0 Hz, 1H), 3.35 (dd, *J* = 13.5, 10.2 Hz, 1H), 2.74 (dd, *J* = 9.6, 2.7 Hz, 1H), 1.51 (m, 1H), 0.88 – 0.47 (m, 3H), 0.31 (dtd, *J* = 9.6, 5.7, 4.0 Hz, 1H). <sup>13</sup>C NMR (100 MHz, CDCl<sub>3</sub>) δ ppm 161.9, 139.0, 136.4, 134.9, 127.1, 126.2, 123.4, 122.9, 122.3, 120.2, 118.5, 116.6, 116.4, 66.4, 52.2, 39.9, 30.6, 9.2, 1.2, -0.9. ESI MS *m/z*: [M]<sup>+</sup> 330.2.

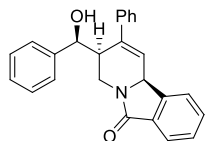

**3-((R)-hydroxy(phenyl)methyl)-2-phenyl-3,4-dihydropyrido[2,1-a]isoindol-6(10bH)-one (78)**: Based on crude NMR dr 11:1, Purified by silica gel chromatography (25% EtOAc in hexane), solid, mp 208 -210 °C, yield 78%, <sup>1</sup>H NMR (400 MHz, CDCl<sub>3</sub>) δ ppm 7.79 (d, *J* = 7.5 Hz, 1H), 7.56 – 7.26 (m, 13H), 6.26 (m, 1H), 5.15 (m, 1H), 4.98 (t, *J* = 3.0 Hz, 1H), 4.16 (dd, *J* = 13.5, 7.0 Hz, 1H), 3.51 (dd, *J* = 13.6, 9.9 Hz, 1H), 3.33 (m, 1H), 1.66 (d, *J* = 3.4 Hz, 1H). <sup>13</sup>C NMR (100 MHz, CDCl<sub>3</sub>) δ ppm 167.3, 143.8, 141.1, 140.4, 140.1, 132.3, 131.5, 128.8, 128.5, 128.3, 127.8, 127.5, 126.6, 125.2, 123.8, 121.9, 71.2, 57.7, 43.5, 35.5. ESI MS *m/z*: [M+H]<sup>+</sup> 368.2.

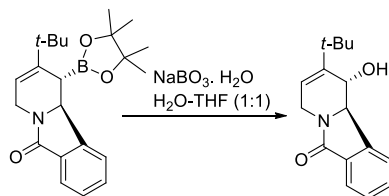

**2-(tert-butyl)-1-hydroxy-1,10b-dihydropyrido[2,1-a]isoindol-6(4H)-one**: To a stirred solution of the boronic acid pinacol ester (30 mg, 0.08 mmol) in 1.0 mL of THF/water (1:1) was added NaBO<sub>3</sub>·H<sub>2</sub>O (24 mg, 0.24 mmol) at 0 °C. This reaction was then warmed to rt and stirred for 24h. Upon completion the reaction was quenched with water. Brine was added to the reaction mixture and the product was extracted with EtOAc (3 × 5mL). The organic layer was collected, dried over Na<sub>2</sub>SO<sub>4</sub> and then concentrated in vacuo giving the crude product, which was purified by silica gel chromatography (40% EtOAc in hexane) to afford the product as gum (17 mg, 82%).

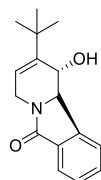

**2-(tert-butyl)-1-hydroxy-1,10b-dihydropyrido[2,1-a]isoindol-6(4H)-one (79)**: Purified by silica gel chromatography (40% EtOAc in hexane), gum, yield 82%, <sup>1</sup>H NMR (400 MHz, Acetone-*d*<sub>6</sub>) δ 7.66 (ddt, *J* = 12.3, 7.6, 1.0 Hz, 2H), 7.60 – 7.32 (m, 2H), 5.79 (t, *J* = 3.2 Hz, 1H), 4.84 (dd, *J* = 8.7, 2.3 Hz, 1H), 4.71 – 4.42 (m, 2H), 3.80 (dd, *J* = 18.8, 3.3 Hz, 1H), 3.55 (d, *J* =

8.7 Hz, 1H), 2.83 (bs, 1H), 1.19 (s, 9H);  $^{13}\text{C}$  NMR (100 MHz, Acetone- $d_6$ )  $\delta$  ppm 167.1, 146.3, 143.9, 134.4, 130.6, 127.6, 122.9, 122.3, 117.8, 117.8, 63.7, 61.7, 39.8, 34.9, 28.8. ESI MS  $m/z$ :  $[\text{M}+\text{H}]^+$  258.2.

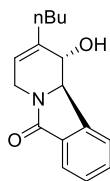

**2-butyl-1-hydroxy-1,10b-dihydropyrido[2,1-a]isoindol-6(4H)-one (80):** purified by silica gel chromatography (40% EtOAc in hexane), gum, yield 80%,  $^1\text{H}$  NMR (400 MHz,  $\text{CDCl}_3$ )  $\delta$  ppm 7.87 (dt,  $J = 7.3, 1.1$  Hz, 1H), 7.84 – 7.75 (m, 1H), 7.56 (td,  $J = 7.4, 1.3$  Hz, 1H), 7.50 (td,  $J = 7.4, 1.1$  Hz, 1H), 5.62 (m, 1H), 4.68 – 4.48 (m, 1H), 4.24 (dd,  $J = 8.9, 1.0$  Hz, 1H), 4.04 – 3.86 (m, 1H), 3.88 – 3.67 (m, 1H), 2.45 – 2.23 (m, 2H), 2.23 – 2.07 (m, 1H), 1.53 – 1.18 (m, 4H), 0.89 (t,  $J = 7.1$  Hz, 3H).  $^{13}\text{C}$  NMR (100 MHz,  $\text{CDCl}_3$ )  $\delta$  ppm 166.9, 144.9, 138.9, 132.4, 131.4, 128.5, 123.6, 123.2, 119.0, 70.9, 60.6, 39.4, 31.4, 30.1, 22.5, 13.9. ESI MS  $m/z$ :  $[\text{M}+\text{H}]^+$  258.2.

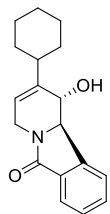

**2-cyclohexyl-1-hydroxy-1,10b-dihydropyrido[2,1-a]isoindol-6(4H)-one (81):** Purified by silica gel chromatography (40% EtOAc in hexane), yield 82%,  $^1\text{H}$  NMR (400 MHz, Acetone- $d_6$ )  $\delta$  ppm 7.85 (dd,  $J = 7.6, 0.9$  Hz, 1H), 7.72 (dt,  $J = 7.3, 0.9$  Hz, 1H), 7.58 (td,  $J = 7.5, 1.3$  Hz, 1H), 7.51 (td,  $J = 7.5, 1.0$  Hz, 1H), 5.62 – 5.50 (m, 1H), 4.89 (d,  $J = 8.4$  Hz, 1H), 4.50 – 4.34 (m, 1H), 4.24 (dd,  $J = 8.9, 0.9$  Hz, 1H), 3.91 (m, 1H), 3.76 (dd,  $J = 18.2, 2.3$  Hz, 1H), 2.49 (m, 1H), 1.96 – 1.55 (m, 5H), 1.45 – 0.79 (m, 5H).  $^{13}\text{C}$  NMR (100 MHz, Acetone- $d_6$ )  $\delta$  ppm 165.6, 145.8, 145.3, 132.7, 130.9, 128.0, 123.7, 122.6, 115.9, 69.7, 60.4, 39.0, 37.7, 33.1, 31.3, 26.7, 26.5, 26.3. ESI MS  $m/z$ :  $[\text{M}+\text{H}]^+$  284.2.

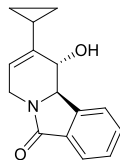

**2-cyclopropyl-1-hydroxy-1,10b-dihydropyrido[2,1-a]isoindol-6(4H)-one (82):** Purified by silica gel chromatography (40% EtOAc in hexane), yield 82%,  $^1\text{H}$  NMR (400 MHz, Acetone- $d_6$ )  $\delta$  ppm 7.86 (dt,  $J = 7.5, 0.8$  Hz, 1H), 7.71 (dt,  $J = 7.4, 1.0$  Hz, 1H), 7.59 (td,  $J = 7.5, 1.2$  Hz, 1H), 7.54 – 7.48 (m, 1H), 5.51 – 5.46 (m, 1H), 5.01 (dd,  $J = 7.7, 1.5$  Hz, 1H), 4.43 – 4.33 (m, 1H), 4.28 (d,  $J = 8.9$  Hz, 1H), 3.90 – 3.81 (m, 1H), 3.77 – 3.67 (m, 1H), 1.77 – 1.59 (m, 1H), 1.15 (m, 1H), 0.77 – 0.53 (m, 3H), 0.31 – 0.19 (m, 1H).  $^{13}\text{C}$  NMR (100 MHz, Acetone- $d_6$ )  $\delta$  ppm 165.7, 145.7, 141.8, 132.6, 131.0, 128.1, 123.6, 122.6, 115.9, 70.9, 60.4, 38.7, 11.5, 5.6, 4.7. ESI MS  $m/z$ :  $[\text{M}+\text{H}]^+$  242.1.

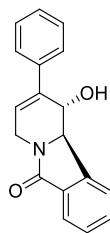

**1-hydroxy-2-phenyl-1,10b-dihydropyrido[2,1-a]isoindol-6(4H)-one (83):** Purified by silica gel chromatography (40% EtOAc in hexane), yield 79%,  $^1\text{H}$  NMR (400 MHz, Acetone- $d_6$ )  $\delta$  ppm 7.89 (d,  $J = 7.5$  Hz, 1H), 7.76 (dt,  $J = 7.4, 1.0$  Hz, 1H), 7.62 (td,  $J = 7.5, 1.3$  Hz, 1H), 7.54 (td,  $J = 7.4, 1.1$  Hz, 1H), 7.47 – 7.36 (m, 2H), 7.36 – 7.18 (m, 3H), 6.08 (ddd,  $J = 3.9, 2.5, 1.4$  Hz, 1H), 4.77 – 4.57 (m, 2H), 4.44 (m, 2H, including OH), 3.91 (dt,  $J = 19.2, 2.2$  Hz, 1H).  $^{13}\text{C}$  NMR (100 MHz, Acetone- $d_6$ )  $\delta$  ppm 165.6, 145.7, 141.2, 139.0, 132.6, 131.1, 128.2, 127.9, 127.4, 126.9, 123.7, 122.7, 122.6, 69.2, 60.4, 39.1. ESI MS  $m/z$ :  $[\text{M}+\text{H}]^+$  278.1.

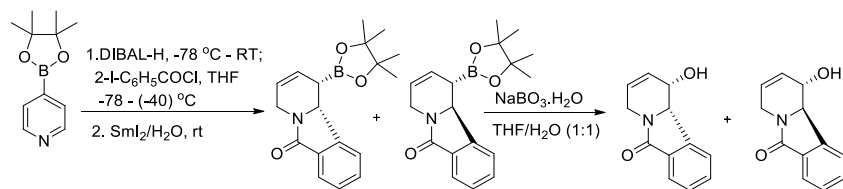

To a stirred solution of 4-pyridineboronic acid pinacol ester (100 mg, 0.48 mmol)(recrystallized from  $\text{CHCl}_3$  and hexanes) in dry THF (1.5 mL) at  $-78\text{ }^\circ\text{C}$  was added DIBAL-H (25% wt. in toluene, 0.4 mL, 0.72mmol). The reaction was stirred at  $-78\text{ }^\circ\text{C}$  for 30 min then warmed and stirred for an additional 1.5 h. The reaction was then degassed by three freeze-pump-thaw cycles at which point it was recooled to  $-78\text{ }^\circ\text{C}$ . In separate vial a THF (0.4 mL) solution of 2-I-PhCOCl (140 mg, 0.53 mmol) was degassed by three freeze-pump-thaw cycles and added slowly (10 minutes) into the reaction mixture. The reaction was stirred at  $-78\text{ }^\circ\text{C}$  for 30 min then warmed to  $-40\text{ }^\circ\text{C}$  and stirred at temperature overnight (15h). After that the reaction mixture was kept outside at room temperature for 10 minutes. In the meantime  $\text{SmI}_2$  solution in THF with water was prepared. In a dry reaction flask 0.1 M  $\text{SmI}_2$  solution (14.4 mL, 1.44 mmol) in THF was transferred followed by addition of  $\text{H}_2\text{O}$  (0.2 mL, 11.4 mmol) and stirred for 5 minutes under an inert atmosphere of argon. The reaction mixture was transferred into the  $\text{SmI}_2$  mixture via cannula dropwise with constant stirring. Extra  $\text{SmI}_2$  solution (3-4 equivalents) in THF was added to the reaction mixture to maintain the blue color. The reaction was stirred for an additional 30 minutes and then quenched with water. The reaction mixture was filtered through Celite. Brine was added to the filtrate and the product was extracted with EtOAc ( $3 \times 15\text{ mL}$ ). The organic layer was collected, dried over  $\text{Na}_2\text{SO}_4$  and then concentrated in vacuo to afford yellow gum, which was directly taken to the next step without further purification. The yellow gum was dissolved in THF (1mL) and water (1mL) followed by addition of  $\text{NaBO}_3 \cdot \text{H}_2\text{O}$  (110 mg, 0.72 mmol) and stirred at rt for 20h. The reaction mixture was extracted with EtOAc ( $10 \times 5\text{ mL}$ ), dried over  $\text{Na}_2\text{SO}_4$  and concentrated. The crude reaction mixture was purified by silica gel chromatography (40% EtOAc in hexane) to afford the product as mixture of diastereomers (54 mg, 56%).

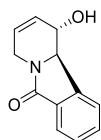

**1-hydroxy-1,10b-dihydropyrido[2,1-a]isoindol-6(4H)-one (84-anti):** Purified by silica gel chromatography (40% EtOAc in hexane), gum,  $^1\text{H NMR}$  (400 MHz,  $\text{CDCl}_3$ )  $\delta$  ppm 7.96 – 7.72 (m, 2H), 7.54 (m, 2H), 5.99 – 5.81 (m, 2H), 4.67 – 4.50 (m, 1H), 4.20 (dd,  $J = 8.7, 1.0$  Hz, 1H), 3.97 (d,  $J = 7.0$  Hz, 1H), 3.80 (dt,  $J = 19.6, 2.6$  Hz, 1H), 2.41 (bs, 1H).  $^{13}\text{C NMR}$  (100 MHz,  $\text{CDCl}_3$ )  $\delta$  ppm 167.2, 144.7, 132.2, 131.6, 129.4, 128.5, 124.7, 123.6, 123.2, 69.7, 60.5, 39.3. ESI MS  $m/z$ :  $[\text{M}+\text{H}]^+$  202.1

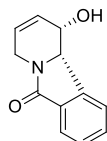

**1-hydroxy-1,10b-dihydropyrido[2,1-a]isoindol-6(4H)-one (84-syn):** Purified by silica gel chromatography (40% EtOAc in hexane), gum,  $^1\text{H NMR}$  (400 MHz,  $\text{CDCl}_3$ )  $\delta$  ppm 7.60 – 7.48 (m, 3H), 7.31 (ddd,  $J = 8.0, 6.3, 2.0$  Hz, 1H), 6.25 (ddt,  $J = 10.3, 5.3, 2.4$  Hz, 1H), 6.09 (ddd,  $J = 10.0, 3.5, 2.5$  Hz, 1H), 4.75 – 4.54 (m, 3H), 3.83 (dt,  $J = 19.4, 1.9$  Hz, 1H), 2.83 (bs, 1H).  $^{13}\text{C NMR}$  (100 MHz,  $\text{CDCl}_3$ )  $\delta$  ppm 168.1, 142.5, 133.0, 131.3, 128.3, 127.7, 126.2, 123.5, 122.5, 64.05, 60.8, 40.1. ESI MS  $m/z$ :  $[\text{M}+\text{H}]^+$  202.1

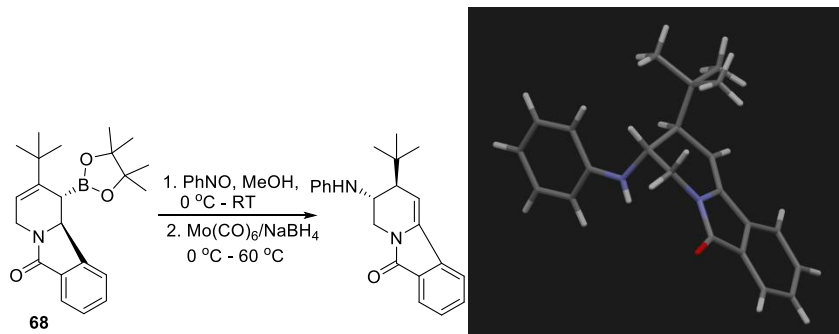

**2-(tert-butyl)-3-(phenylamino)-3,4-dihydropyrido[2,1-a]isoindol-6(10bH)-one (85):** To a stirred solution of compound **66** (25 mg, 0.067 mmol) and nitrosobenzene (25 mg, 0.237 mmol) under argon atmosphere at  $0\text{ }^\circ\text{C}$  was added ice cooled dry degassed methanol (1.2 mL). The reaction was stirred for 10 minutes at  $0\text{ }^\circ\text{C}$  then warmed to rt and stirred for one hour. The reaction was cooled to  $0\text{ }^\circ\text{C}$  and transferred to an oven dried vial containing  $\text{NaBH}_4$  (13 mg, 0.33 mmol) &  $\text{Mo}(\text{CO})_6$  (53 mg, 0.20 mmol). To

the reaction mixture was added 0.1 mL of water. The reaction was stirred at 0 °C for 10 min and then warmed to 60 °C and stirred for 1.5 h. Upon completion the reaction was quenched with water and the product was extracted with EtOAc (3 × 5 mL). The organic layer was collected, dried over Na<sub>2</sub>SO<sub>4</sub> and then concentrated in vacuo to afford yellow gum, which was purified by silica gel chromatography to afford the product as white solid (16 mg, 69%), mp<sup>1</sup>H NMR (400 MHz, Acetone-*d*<sub>6</sub>) δ ppm 7.90 (dt, *J* = 7.7, 0.9 Hz, 1H), 7.70 (dt, *J* = 7.6, 1.0 Hz, 1H), 7.63 (td, *J* = 7.5, 1.2 Hz, 1H), 7.52 (td, *J* = 7.5, 1.0 Hz, 1H), 7.12 – 7.03 (m, 2H), 6.69 (m, *J* = 7.0, 1.1 Hz, 2H), 6.56 (tt, *J* = 7.3, 1.1 Hz, 1H), 6.02 (dd, *J* = 5.7, 1.2 Hz, 1H), 5.07 (d, *J* = 9.4 Hz, 1H), 4.26 (ddt, *J* = 9.1, 3.2, 1.6 Hz, 1H), 4.15 (ddd, *J* = 13.5, 2.6, 1.5 Hz, 1H), 3.64 (dd, *J* = 13.5, 3.4 Hz, 1H), 2.44 (dt, *J* = 5.8, 1.7 Hz, 1H), 1.11 (s, 9H). <sup>13</sup>C NMR (100 MHz, Acetone-*d*<sub>6</sub>) δ ppm 165.5, 146.9, 135.6, 134.5, 131.4, 130.3, 129.0, 128.7, 122.3, 120.0, 116.5, 113.0, 102.8, 49.6, 45.9, 40.8, 34.4, 28.0. ESI MS *m/z*: [M+H]<sup>+</sup> 333.2. The relative stereochemistry was assigned based on 2D-NOESY data.

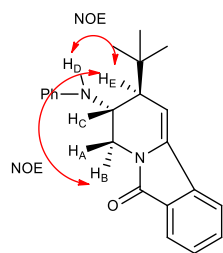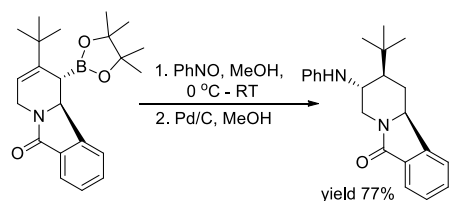

**2-(tert-butyl)-3-(phenylamino)-1,3,4,10b-tetrahydropyrido[2,1-a]isoindol-6(2H)-one (86):** To a 0 °C stirred solution of compound **66** (20 mg, 0.054 mmol) and nitrosobenzene (20 mg, 1.89 mmol) was added ice cooled dry degassed methanol (1.0 mL). The reaction was stirred for 10 minutes at 0 °C then warmed to room temperature and stirred for one hour. The reaction mixture was transferred to an oven dried vial containing palladium (30%) on carbon under argon atmosphere. The reaction vessel was then charged with hydrogen (ballon) and stirred at rt overnight (15h). The reaction mixture was filtered through Celite and concentrated in vacuo giving a yellow oil, which was purified by silica gel chromatography (30% EtOAc in hexane) to afford the product as yellow oil (14 mg, 77%). <sup>1</sup>H NMR (400 MHz, Acetone-*d*<sub>6</sub>) δ ppm 7.69 (dt, *J* = 7.6, 1.0 Hz, 1H), 7.66 – 7.54 (m, 2H), 7.52 – 7.43 (m, 1H), 7.18 – 7.06 (m, 2H), 6.78 – 6.67 (m, 2H), 6.58 (tt, *J* = 7.3, 1.0 Hz, 1H), 4.71 (d, *J* = 10.7 Hz, 1H), 4.52 – 4.34 (m, 2H), 3.46 (tt, *J* = 10.5, 5.2 Hz, 1H), 2.75 (dd, *J* = 13.5, 10.3 Hz, 1H), 2.63 (dt, *J* = 13.0, 3.6 Hz, 1H), 1.83 (ddd, *J* = 12.2, 10.4, 3.2 Hz, 1H), 1.05 (s, 10H). <sup>13</sup>C NMR (100 MHz, Acetone-*d*<sub>6</sub>) δ ppm 164.5, 147.0, 146.1, 132.7, 131.1, 129.3, 127.9, 122.9, 122.4, 116.4, 112.3, 57.8, 52.2, 48.5, 43.6, 33.2, 32.8, 26.8. ESI MS *m/z*: [M+H]<sup>+</sup> 335.2. The relative stereochemistry was assigned based on 2D-NOESY data.

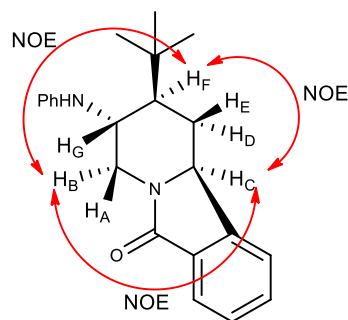



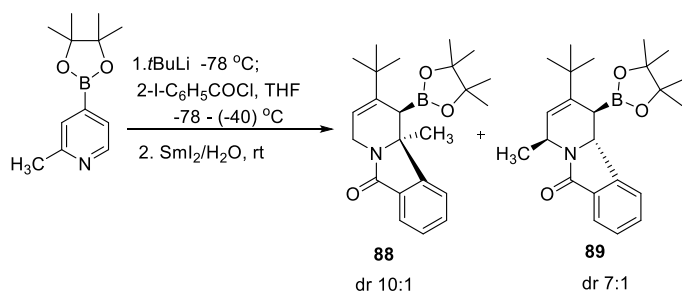

To a stirred solution of 2-methyl-4-pyridineboronic acid pinacol ester (50 mg, 0.23mmol)(recrystallized from CHCl<sub>3</sub> and hexanes) in dry THF (1 mL) at -78 °C was added <sup>t</sup>BuLi solution in pentane (145 μL, 0.25mmol). The reaction was stirred at -78 °C for 30 min then warmed to rt and stirred for 15 min. The reaction was degassed by three freeze-pump-thaw cycles at which point it was recooled to -78 °C. In another vial a THF (0.2 mL) solution of 2-I-PhCOCl (67 mg, 0.25mmol) was degassed by three freeze-pump-thaw cycles and added slowly (10 minutes) into the reaction mixture. The reaction was stirred at -78 °C for 30 min then warmed to -40 °C and stirred overnight (15h). After that the reaction mixture was kept outside at room temperature for 10 minutes. In the meantime SmI<sub>2</sub> solution in THF with water was prepared. In a dry reaction flask 0.1 M SmI<sub>2</sub> solution (6.9 mL, 0.69 mmol) in THF was transferred followed by addition of degassed water (0.1 mL, 5.52 mmol) and stirred for 5 minutes under an inert atmosphere of argon. The reaction mixture was transferred into the SmI<sub>2</sub> mixture via cannula dropwise with constant stirring under argon atmosphere. Extra 0.1 M SmI<sub>2</sub> solution (3- 4 equivalent) in THF was added to the reaction mixture to maintain the blue color. The reaction was stirred for an additional 30 minutes and then quenched with water. The reaction mixture was filtered through Celite. Brine was added to the filtrate and the product was extracted with EtOAc (3 × 15mL). The organic layer was collected, dried over Na<sub>2</sub>SO<sub>4</sub> and then concentrated in vacuo to give yellow gum mixture of regioisomer and diastereomers, which was purified by silica gel chromatography (30% EtOAc in hexane) to afford the product as gum (75 mg, 86%). The diastereomers are separated by preparative TLC (30% EtOAc in hexane).

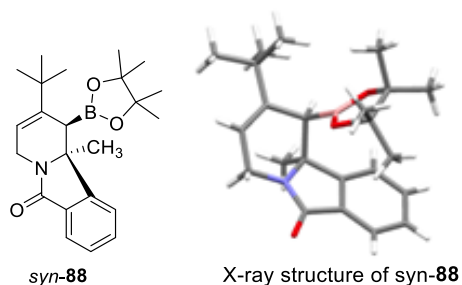

**2-(tert-butyl)-10b-methyl-1-(4,4,5,5-tetramethyl-1,3,2-dioxaborolan-2-yl)-1,10b-dihydropyrido[2,1-a]isoindol-6(4H)-one (*syn*-**88**):** The relative stereochemistry was determined by X-ray crystallography. A single crystal suitable for X-ray crystallography was grown by slow evaporation of ethyl acetate and pentane at room temperature. Purified by silica gel chromatography (30% EtOAc in hexane), white solid, <sup>1</sup>H NMR (400 MHz, CDCl<sub>3</sub>) δ ppm 7.78 (dt, *J* = 7.5, 1.0 Hz, 1H), 7.60 – 7.44 (m, 2H), 7.39 (ddd, *J* = 8.1, 6.4, 2.1 Hz, 1H), 5.61 – 5.50 (m, 1H), 4.65 (dd, *J* = 18.7, 2.8 Hz, 1H), 3.76 (ddd, *J* = 18.8, 3.6, 1.4 Hz, 1H), 2.46 (s, 1H), 1.38 (s, 3H), 1.07 (s, 9H), 0.71 (6H, s), 0.65 (6H, s). <sup>13</sup>C NMR (100 MHz, CDCl<sub>3</sub>) δ ppm 166.5, 150.3, 143.9, 132.9, 130.9, 128.0, 123.3, 122.1, 112.4, 83.1, 61.2, 38.8, 35.6, 33.3 (boron attach to carbon), 28.9, 24.6, 24.4. ESI MS *m/z*: [M+H]<sup>+</sup> 382.2.

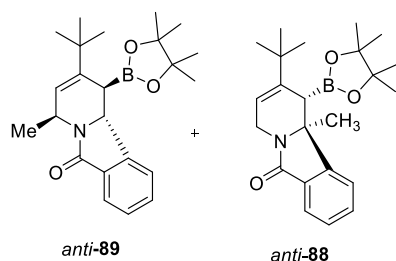

Inseparable mixture of two compounds,

## Combined NMR Data

**2-(tert-butyl)-4-methyl-1-(4,4,5,5-tetramethyl-1,3,2-dioxaborolan-2-yl)-1,10b-dihydropyrido[2,1-a]isoindol-6(4H)-one (anti-89):** <sup>1</sup>H NMR (400 MHz, CDCl<sub>3</sub>) δ ppm 7.82 (dt, *J* = 7.5, 1.0 Hz, 1H), 7.74 – 7.69 (m, 1H), 7.51 (td, *J* = 7.5, 1.3 Hz, 1H), 7.46 – 7.40 (m, 1H), 5.76 (dd, *J* = 5.4, 2.1 Hz, 1H), 4.87 – 4.75 (m, 1H), 4.65 (d, *J* = 9.5 Hz, 1H), 2.03 (dt, *J* = 9.6, 2.1 Hz, 1H), 1.39 (s, 6H), 1.32 (d, *J* = 6.7 Hz, 3H), 1.35 (s, 6H), 1.05 (s, 9H). <sup>13</sup>C NMR (100 MHz, CDCl<sub>3</sub>) δ ppm 165.4, 146.9, 143.5, 131.0, 127.9, 123.5, 122.4, 121.4, 84.2, 54.2, 44.0, 30.5, 28.9 (carbon attach with boron), 25.6, 24.8, 20.6. ESI MS *m/z*: [M+H]<sup>+</sup> 382.2.

**2-(tert-butyl)-10b-methyl-1-(4,4,5,5-tetramethyl-1,3,2-dioxaborolan-2-yl)-1,10b-dihydropyrido[2,1-a]isoindol-6(4H)-one (anti-88):** <sup>1</sup>H NMR (400 MHz, CDCl<sub>3</sub>) δ ppm 7.78 (m, 1H), 7.68 (d, *J* = 1.0 Hz, 1H), 7.49 (d, *J* = 1.3 Hz, 1H), 7.40 (1H, m), 5.79 (s, 1H), 1.53 (d, *J* = 17.4 Hz, 3H), 1.34 (s, 6H), 1.32 (s, 6H), 0.98 (s, 9H). <sup>13</sup>C NMR (100 MHz, CDCl<sub>3</sub>) δ ppm 166.4, 153.1, 146.1, 132.3, 131.3, 127.8, 123.5, 121.6, 117.3, 84.1, 61.7, 35.9, 33.8 (carbon attach with boron), 30.3, 25.8, 25.4, 24.2. ESI MS *m/z*: [M+H]<sup>+</sup> 382.2.

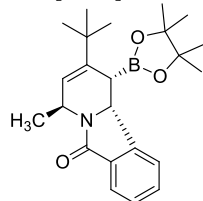

**2-(tert-butyl)-4-methyl-1-(4,4,5,5-tetramethyl-1,3,2-dioxaborolan-2-yl)-1,10b-dihydropyrido[2,1-a]isoindol-6(4H)-one (syn-89):** <sup>1</sup>H NMR (400 MHz, CDCl<sub>3</sub>) δ ppm 7.81 (dt, *J* = 7.6, 1.0 Hz, 1H), 7.55 (dd, *J* = 7.6, 1.1 Hz, 1H), 7.49 (td, *J* = 7.4, 1.2 Hz, 1H), 7.46 – 7.38 (m, 1H), 5.49 (d, *J* = 2.5 Hz, 1H), 4.71 (qd, *J* = 6.8, 2.4 Hz, 1H), 4.44 (d, *J* = 4.6 Hz, 1H), 2.62 (d, *J* = 4.6 Hz, 1H), 1.34 (d, *J* = 6.8 Hz, 3H), 1.10 (s, 9H), 0.74 (s, 6H), 0.69 (s, 6H). <sup>13</sup>C NMR (100 MHz, CDCl<sub>3</sub>) δ ppm 166.9, 144.9, 144.7, 134.6, 130.6, 128.2, 123.2, 123.1, 120.1, 83.2, 55.9, 45.9, 35.8, 29.7 (boron attach to carbon), 29.0, 24.4, 24.2, 21.5. ESI MS *m/z*: [M+H]<sup>+</sup> 382.2.

The relative stereochemistry was determined based on following data

1. B(pin) and Ph are cis based on the 4.6 Hz coupling constant of the respective proton.
2. The relative stereochemistry of the CH<sub>3</sub> group was determined tentatively based on lack of 1,3 coupling which was obtained in the unsubstituted compound **68-syn**.

## Computational Section:

NMR calculations:

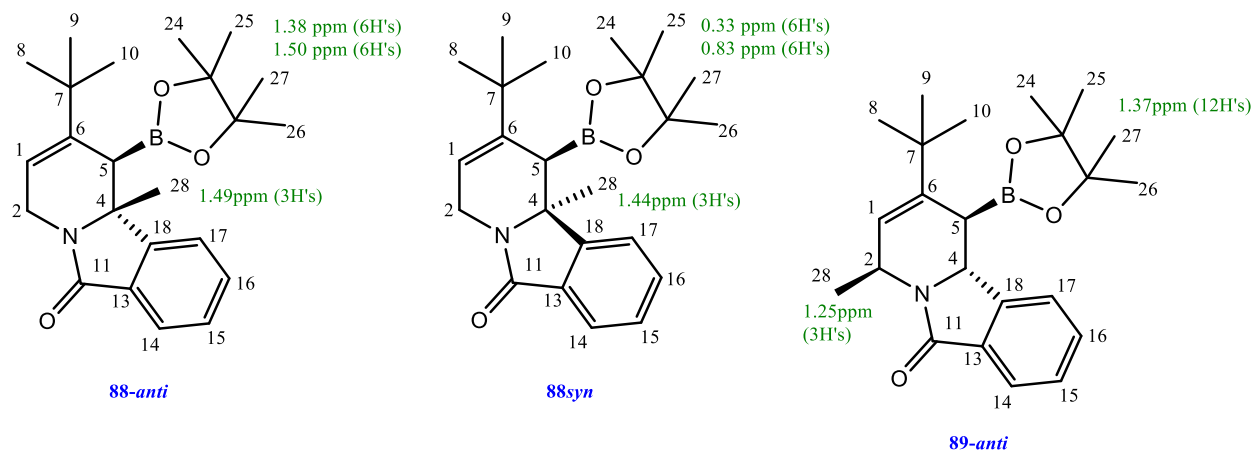

With the initial experimental  $^1\text{H}$ - $\delta$  and  $^{13}\text{C}$ - $\delta$  of the major product and  $^1\text{H}$ - $\delta$  of the minor products, and based on the derived relative stereochemistry, we built and optimized (M06-2X/6-31+G(d,p))<sup>43</sup> these structures with Gaussian09,<sup>44</sup> then performed quantum mechanical  $^1\text{H}$ -NMR and  $^{13}\text{C}$ -NMR calculations (mPW1PW91/6-311+G(2d,p) in chloroform)<sup>45, 46, 4</sup> (see supporting information for more details). With a smaller mean average deviation (MAD) from the experimental values of the major product (MAD = 0.08 ppm for  $^1\text{H}$ - $\delta$ , and 1.33 ppm for  $^{13}\text{C}$ - $\delta$ ), **computed 88-syn** (or its enantiomer) was predicted to be the major diastereomer/major regioisomer, which was later confirmed by X-Ray crystallography. The predicted  $^{13}\text{C}$ - $\delta$  of **computed 88-anti** and **89-anti** were also shown to be in good agreement with the latter experimental  $^{13}\text{C}$ -NMR data of minor diastereomer/major regioisomer and major diastereomer/minor regioisomer, respectively. In addition, computed and experimental proton assignments also reveal the diagnostic peaks that would help distinguish between the pair of diastereomers of the major product, as shown in figure above.

All the calculations were done with *Gaussian09, Revision D*.

Geometry optimization method: M06-2X/6-31+G(d,p).

NMR calculation method: mPW1PW91/6-311+G(2d,p) in Chloroform (SMD solvation model).

Scaling factor obtained from <http://cheshirenmr.info/>:

Slope = -1.0938 (for H) and -1.0446 (for C)

Intercept = 31.8723 (for H) and 186.7246 (for C)

#### Analysis for the diastereomer pair of the major regioisomers

Based on the comparison shown below: this structure (**88-anti**) (or its enantiomer) was predicted to be the minor diastereomer/major regioisomer.

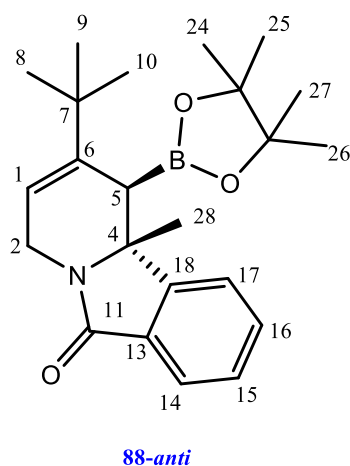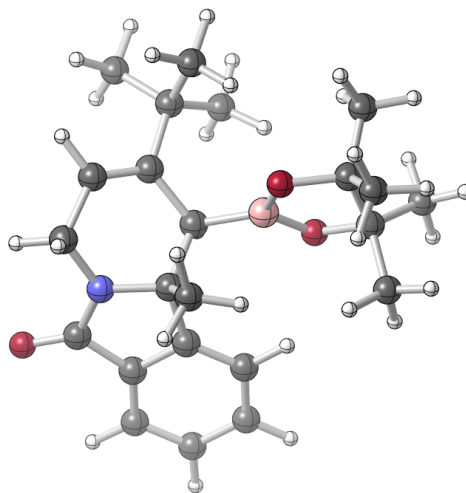

(43) Zhao, Y.; Truhlar, D. G. *Theor. Chem. Acc.* **2008**, 120, 215-241.

(44) *Gaussian 09, Revision B.01*; Gaussian, Inc.: Wallingford, CT, 2004 (full reference in Supporting Information).

(45) Adamo, C.; Barone, V. *J. Chem. Phys.* **1998**, 108, 664-675.

(46) For a review on the application of QM calculations in synthesis: Nguyen, Q. N. N.; Tantillo, D. J. *Chem. Asian. J.* **2014**, 9, 674-680.

| Computed $\delta$ (ppm) [A] | Atom Labels      | Major Diastereomer/major regiomer |                          | Minor Diastereomer/major regiomer |                          |
|-----------------------------|------------------|-----------------------------------|--------------------------|-----------------------------------|--------------------------|
|                             |                  | Exp $\delta$ (ppm) [1]            | $\Delta$ b/w [A] and [1] | Exp $\delta$ (ppm) [2]            | $\Delta$ b/t [A] and [2] |
| 8.03                        | H17              | 7.5                               | 0.53                     | 7.68                              | 0.35                     |
| 7.64                        | H14              | 7.78                              | 0.14                     | 7.77                              | 0.13                     |
| 7.41                        | H16              | 7.4                               | 0.01                     | 7.4                               | 0.01                     |
| 7.35                        | H15              | 7.48                              | 0.13                     | 7.51                              | 0.16                     |
| 5.85                        | H1               | 5.55                              | 0.30                     | 5.81                              | 0.04                     |
| 4.53                        | H2               | 4.65                              | 0.12                     | 4.65                              | 0.12                     |
| 3.58                        | H2'              | 3.77                              | 0.19                     | 3.68                              | 0.10                     |
| 2.27                        | H5               | 2.47                              | 0.20                     | 2.32                              | 0.05                     |
| 1.50                        | H24,25 or H26,27 | 0.7                               | 0.80                     | 1.39                              | 0.11                     |
| 1.49                        | H28              | 1.39                              | 0.10                     | 1.55                              | 0.06                     |
| 1.38                        | H24,25 or H26,27 | 0.64                              | 0.74                     | 1.39                              | 0.01                     |
| 1.17                        | H8,9,10          | 1.1                               | 0.07                     | 1.00                              | 0.17                     |
|                             |                  |                                   |                          |                                   |                          |
|                             |                  | MAD =                             | 0.28                     | MAD =                             | 0.11                     |

| Computed $\delta$ (ppm) [A] | Atom Labels     | Major Diastereomer/major regiomer |                          | Minor Diastereomer/major regiomer |                          |
|-----------------------------|-----------------|-----------------------------------|--------------------------|-----------------------------------|--------------------------|
|                             |                 | Exp $\delta$ (ppm) [1]            | $\Delta$ b/w [A] and [1] | Exp $\delta$ (ppm) [2]            | $\Delta$ b/t [A] and [2] |
| 161.8                       | C11             | 166.62                            | 4.77                     | 166.42                            | 4.57                     |
| 152.9                       | C18             | 150.41                            | 2.46                     | 153.06                            | 0.19                     |
| 148.1                       | C6              | 144.13                            | 3.96                     | 146.24                            | 1.85                     |
| 131.0                       | C13             | 133.07                            | 2.04                     | 132.47                            | 1.44                     |
| 130.0                       | C16             | 131.07                            | 1.08                     | 131.48                            | 1.49                     |
| 126.8                       | C15             | 128.17                            | 1.36                     | 127.99                            | 1.18                     |
| 122.9                       | C17             | 123.47                            | 0.58                     | 123.69                            | 0.80                     |
| 122.3                       | C14             | 122.23                            | 0.09                     | 121.74                            | 0.58                     |
| 119.9                       | C1              | 112.43                            | 7.44                     | 117.46                            | 2.41                     |
| 83.3                        | C22 or C21      | 83.24                             | 0.09                     | 84.11                             | 0.78                     |
| 82.8                        | C22 or C21      | 83.24                             | 0.47                     | 84.11                             | 1.34                     |
| 60.1                        | C4              | 61.38                             | 1.32                     | 61.87                             | 1.81                     |
| 38.2                        | C7              | 35.63                             | 2.61                     | 36.12                             | 2.12                     |
| 36.5                        | C2              | 38.99                             | 2.45                     | 36.89                             | 0.35                     |
| 35.2                        | C5              | 33.12                             | 2.13                     | 28.96                             | 6.29                     |
| 29.9                        | C8, 9, or 10    | 29.11                             | 0.82                     | 30.51                             | 0.58                     |
| 26.1                        | C24, 25, 26, 27 | 24.6                              | 1.55                     | 25.99                             | 0.16                     |
| 24.3                        | C28             | 24.73                             | 0.48                     | 24.4                              | 0.15                     |
| 23.3                        | C24, 25, 26, 27 | 24.53                             | 1.27                     | 25.53                             | 2.27                     |
|                             |                 |                                   |                          |                                   |                          |
|                             |                 | MAD =                             | 1.95                     | MAD =                             | 1.60                     |

Based on the comparison shown below: this structure (**88-syn**) (or its enantiomer) was predicted to be the major diastereomer/major regioisomer. Confirmed by crystal structure.

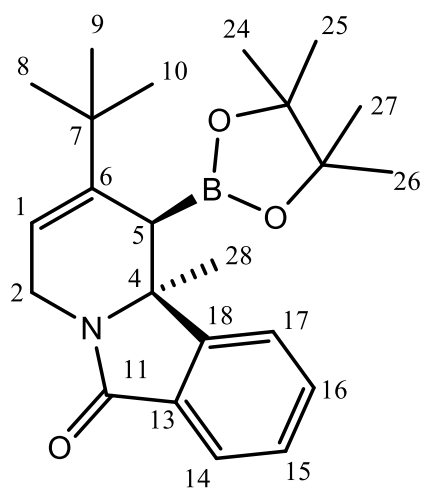

**88-anti**

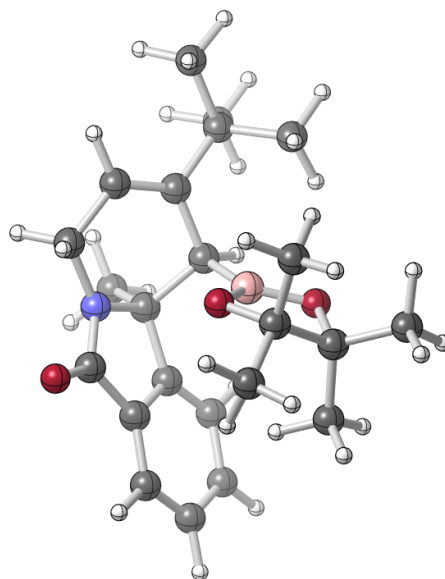

| Computed $\delta$ (ppm) [B] | Atom Labels      | Major Diastereomer/major regioisomer |                          | Minor Diastereomer/major regioisomer |                          |
|-----------------------------|------------------|--------------------------------------|--------------------------|--------------------------------------|--------------------------|
|                             |                  | Exp $\delta$ (ppm) [1]               | $\Delta$ b/w [B] and [1] | Exp $\delta$ (ppm) [2]               | $\Delta$ b/t [B] and [2] |
| 7.72                        | H14              | 7.78                                 | 0.06                     | 7.77                                 | 0.05                     |
| 7.47                        | H17              | 7.5                                  | 0.03                     | 7.68                                 | 0.21                     |
| 7.38                        | H16              | 7.4                                  | 0.02                     | 7.4                                  | 0.02                     |
| 7.32                        | H15              | 7.48                                 | 0.16                     | 7.51                                 | 0.19                     |
| 5.52                        | H1               | 5.55                                 | 0.03                     | 5.81                                 | 0.29                     |
| 4.55                        | H2               | 4.65                                 | 0.10                     | 4.65                                 | 0.10                     |
| 3.75                        | H2'              | 3.77                                 | 0.02                     | 3.68                                 | 0.07                     |
| 2.54                        | H5               | 2.47                                 | 0.07                     | 2.32                                 | 0.22                     |
| 1.44                        | H28              | 1.39                                 | 0.05                     | 1.55                                 | 0.11                     |
| 1.09                        | H8,9,10          | 1.1                                  | 0.01                     | 1.00                                 | 0.09                     |
| 0.83                        | H24,25 or H26,27 | 0.7                                  | 0.13                     | 1.39                                 | 0.56                     |
| 0.33                        | H24,25 or H26,27 | 0.64                                 | 0.31                     | 1.39                                 | 1.06                     |
|                             |                  |                                      |                          |                                      |                          |
|                             |                  | MAD =                                | 0.08                     | MAD =                                | 0.25                     |

| Computed $\delta$ (ppm) [B] | Atom Labels     | Major Diastereomer/major regioisomer |                          | Minor Diastereomer/major regioisomer |                          |
|-----------------------------|-----------------|--------------------------------------|--------------------------|--------------------------------------|--------------------------|
|                             |                 | Exp $\delta$ (ppm) [1]               | $\Delta$ b/w [B] and [1] | Exp $\delta$ (ppm) [2]               | $\Delta$ b/t [B] and [2] |
| 164.8                       | C11             | 166.62                               | 1.79                     | 166.42                               | 1.59                     |
| 150.5                       | C18             | 150.41                               | 0.12                     | 153.06                               | 2.53                     |
| 146.2                       | C6              | 144.13                               | 2.02                     | 146.24                               | 0.09                     |
| 134.3                       | C13             | 133.07                               | 1.26                     | 132.47                               | 1.86                     |
| 130.2                       | C16             | 131.07                               | 0.83                     | 131.48                               | 1.24                     |
| 126.8                       | C15             | 128.17                               | 1.39                     | 127.99                               | 1.21                     |
| 122.9                       | C17             | 123.47                               | 0.61                     | 123.69                               | 0.83                     |
| 121.8                       | C14             | 122.23                               | 0.41                     | 121.74                               | 0.08                     |
| 113.6                       | C1              | 112.43                               | 1.17                     | 117.46                               | 3.86                     |
| 82.3                        | C22 or C21      | 83.24                                | 0.92                     | 84.11                                | 1.79                     |
| 81.9                        | C22 or C21      | 83.24                                | 1.31                     | 84.11                                | 2.18                     |
| 61.8                        | C4              | 61.38                                | 0.41                     | 61.87                                | 0.08                     |
| 38.0                        | C7              | 35.63                                | 2.34                     | 36.12                                | 1.85                     |
| 39.7                        | C2              | 38.99                                | 0.76                     | 36.89                                | 2.86                     |
| 35.5                        | C5              | 33.12                                | 2.39                     | 28.96                                | 6.55                     |
| 27.1                        | C8, 9, or 10    | 29.11                                | 2.01                     | 30.51                                | 3.41                     |
| 24.7                        | C24, 25, 26, 27 | 24.6                                 | 0.08                     | 25.99                                | 1.31                     |
| 22.2                        | C28             | 24.73                                | 2.51                     | 24.4                                 | 2.18                     |
| 21.6                        | C24, 25, 26, 27 | 24.53                                | 2.90                     | 25.53                                | 3.90                     |
|                             |                 |                                      |                          |                                      |                          |
|                             |                 | MAD =                                | 1.33                     | MAD =                                | 2.07                     |

Analysis for the major diastereomer/minor regioisomer

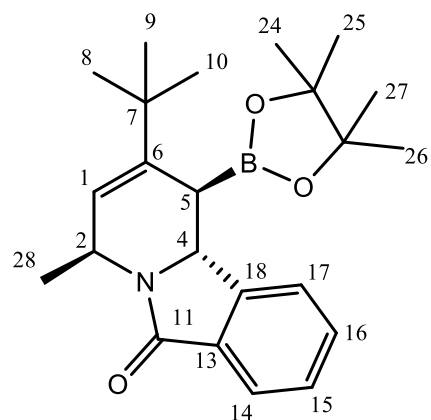

89 (*anti*)

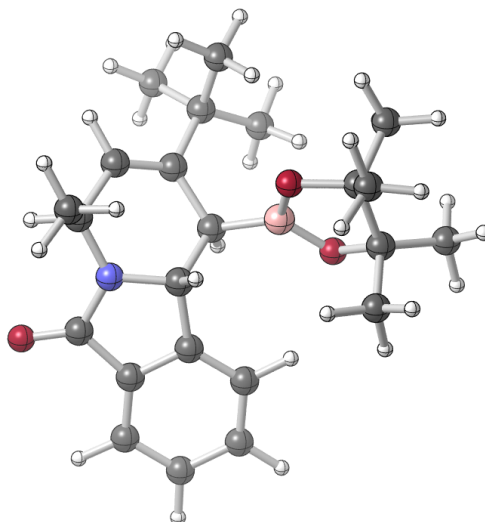

| Atom labels        | Exp $\delta$ (ppm) | Computed $\delta$ (ppm) | $\Delta$    | Atom labels     | Exp $\delta$ (ppm) | Computed $\delta$ (ppm) | $\Delta$    |
|--------------------|--------------------|-------------------------|-------------|-----------------|--------------------|-------------------------|-------------|
| C11                | 165.36             | 162.18                  | 3.18        | H14             | 7.82               | 7.59                    | 0.23        |
| C18                | 146.86             | 147.51                  | 0.65        | H15             | 7.51               | 7.40                    | 0.11        |
| C6                 | 143.71             | 146.91                  | 3.20        | H16             | 7.4                | 7.48                    | 0.08        |
| C13                | 131.02             | 131.82                  | 0.80        | H17             | 7.69               | 8.11                    | 0.42        |
| C16                | 131.2              | 129.40                  | 1.80        | H8, 9, 10       | 1.06               | 1.14                    | 0.08        |
| C15                | 128.11             | 126.30                  | 1.81        | H24, 25, 26, 27 | 1.38               | 1.37                    | 0.01        |
| C1                 | 121.61             | 125.35                  | 3.74        | H5              | 2.04               | 2.13                    | 0.09        |
| C17                | 123.45             | 123.67                  | 0.22        | H4              | 4.65               | 4.51                    | 0.14        |
| C14                | 122.58             | 121.86                  | 0.72        | H28             | 1.32               | 1.25                    | 0.07        |
| C21, 22            | 84.16              | 82.78                   | 1.38        | H1              | 5.77               | 5.81                    | 0.04        |
| C4                 | 54.38              | 53.52                   | 0.86        | H2              | 4.82               | 4.62                    | 0.20        |
| C2                 | 44.17              | 45.34                   | 1.17        |                 |                    | <b>MAD =</b>            | <b>0.13</b> |
| C7                 | 36.17              | 38.61                   | 2.44        |                 |                    |                         |             |
| C8, 9, or 10       | 30.45              | 29.98                   | 0.47        |                 |                    |                         |             |
| C5                 | 29.13              | 30.87                   | 1.74        |                 |                    |                         |             |
| C24, 25, 26, or 27 |                    | 26.21                   |             |                 |                    |                         |             |
| C24, 25, 26, or 27 |                    | 24.78                   |             |                 |                    |                         |             |
| C24, 25, 26, or 27 |                    | 22.52                   |             |                 |                    |                         |             |
| C24, 25, 26, or 27 |                    | 22.04                   |             |                 |                    |                         |             |
| C28                |                    | 19.41                   |             |                 |                    |                         |             |
|                    |                    | <b>MAD =</b>            | <b>1.61</b> |                 |                    |                         |             |

...changing the stereochemistry of C2 resulted in a worse MADs.

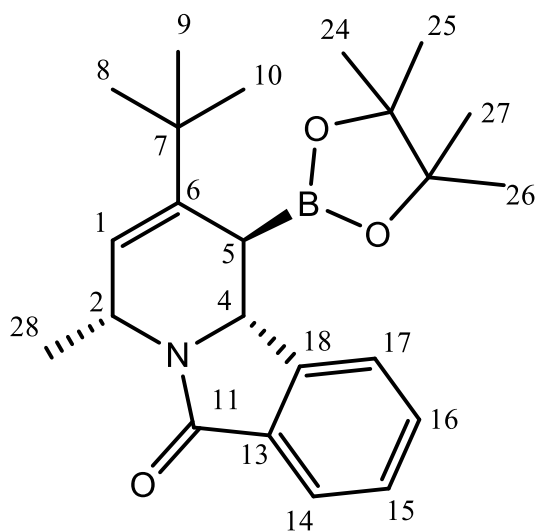

computed *89-anti*  
different stereocenter at C2

| Atom Labels        | Exp $\delta$ (ppm) | Computed $\delta$ (ppm) | $\Delta$ | Atom Labels     | Exp $\delta$ (ppm) | Computed $\delta$ (ppm) | $\Delta$ |
|--------------------|--------------------|-------------------------|----------|-----------------|--------------------|-------------------------|----------|
| C11                | 165.36             | 162.18                  | 3.18     | H14             | 7.82               | 7.6                     | 0.22     |
| C18                | 146.86             | 147.51                  | 0.65     | H15             | 7.51               | 7.4                     | 0.14     |
| C6                 | 143.71             | 146.91                  | 3.20     | H16             | 7.4                | 7.5                     | 0.07     |
| C13                | 131.02             | 131.82                  | 0.80     | H17             | 7.69               | 8.1                     | 0.41     |
| C16                | 131.2              | 129.40                  | 1.80     | H8, 9, 10       | 1.06               | 1.2                     | 0.13     |
| C15                | 128.11             | 126.30                  | 1.81     | H24, 25, 26, 27 | 1.38               | 1.3                     | 0.03     |
| C1                 | 121.61             | 125.35                  | 3.74     | H5              | 2.04               | 2.2                     | 0.21     |
| C17                | 123.45             | 123.67                  | 0.22     | H4              | 4.65               | 4.3                     | 0.38     |
| C14                | 122.58             | 121.86                  | 0.72     | H28             | 1.32               | 1.8                     | 0.45     |
| C21, 22            | 84.16              | 82.78                   | 1.38     | H2              | 4.82               | 4.2                     | 0.58     |
| C4                 | 54.38              | 53.52                   | 0.86     | H1              | 5.77               | 5.5                     | 0.23     |
| C2                 | 44.17              | 45.34                   | 1.17     |                 |                    | MAD =                   | 0.26     |
| C7                 | 36.17              | 38.61                   | 2.44     |                 |                    |                         |          |
| C8, 9, or 10       | 30.45              | 29.98                   | 0.47     |                 |                    |                         |          |
| C5                 | 29.13              | 30.87                   | 1.74     |                 |                    |                         |          |
| C24, 25, 26, or 27 |                    | 26.21                   |          |                 |                    |                         |          |
| C24, 25, 26, or 27 |                    | 24.78                   |          |                 |                    |                         |          |
| C24, 25, 26, or 27 |                    | 22.52                   |          |                 |                    |                         |          |
| C24, 25, 26, or 27 |                    | 22.04                   |          |                 |                    |                         |          |
| C28                |                    | 19.41                   |          |                 |                    |                         |          |
|                    |                    | MAD =                   | 1.61     |                 |                    |                         |          |

Analysis for the minor diastereomer/minor regioisomer



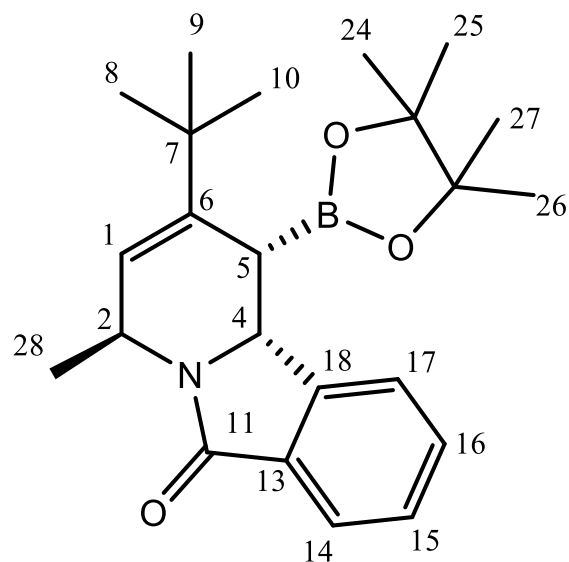

**89-syn**

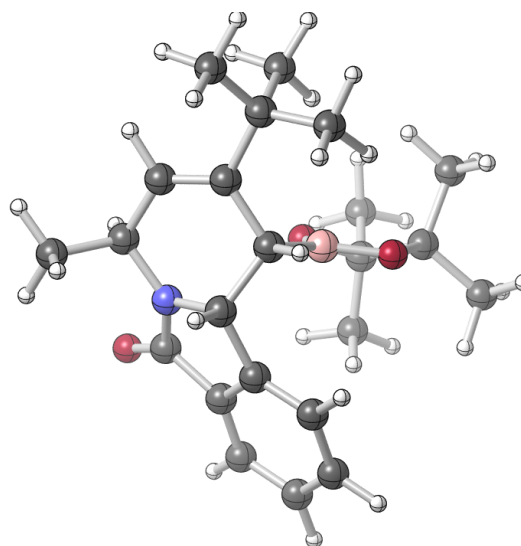

| Atom Labels        | Exp $\delta$ (ppm) | Computed $\delta$ (ppm) | $\Delta$    | Atom Labels     | Exp $\delta$ (ppm) | Computed $\delta$ (ppm) | $\Delta$    |
|--------------------|--------------------|-------------------------|-------------|-----------------|--------------------|-------------------------|-------------|
| C1                 | 120.05             | 123.81                  | 3.76        | H1              | 5.49               | 5.66                    | 0.17        |
| C11                | 166.97             | 163.85                  | 3.12        | H14             | 7.81               | 7.73                    | 0.08        |
| C13                | 134.57             | 135.63                  | 1.06        | H15             | 7.49               | 7.38                    | 0.11        |
| C14                | 123.19             | 123.67                  | 0.48        | H16             | 7.42               | 7.46                    | 0.04        |
| C15                | 128.16             | 127.16                  | 1.00        | H17             | 7.55               | 7.53                    | 0.02        |
| C16                | 130.67             | 129.86                  | 0.81        | H2              | 4.71               | 4.49                    | 0.22        |
| C17                | 123.11             | 123.40                  | 0.29        | H24, 25, 26, 27 | 0.74               | 0.96                    | 0.22        |
| C18                | 144.67             | 144.95                  | 0.28        | H24, 25, 26, 27 | 0.68               | 0.30                    | 0.38        |
| C2                 | 45.89              | 46.16                   | 0.27        | H28             | 1.33               | 1.29                    | 0.04        |
| C21 or 22          | 83.15              | 81.96                   | 1.19        | H4              | 4.44               | 4.42                    | 0.02        |
| C24, 25, 26, or 27 |                    | 26.21                   |             | H5              | 2.62               | 2.75                    | 0.13        |
| C24, 25, 26, or 27 |                    | 24.78                   |             | H8, 9, 10       | 1.1                | 1.16                    | 0.06        |
| C24, 25, 26, or 27 |                    | 22.52                   |             |                 |                    | <b>MAD =</b>            | <b>0.12</b> |
| C24, 25, 26, or 27 |                    | 22.04                   |             |                 |                    |                         |             |
| C28                |                    | 19.41                   |             |                 |                    |                         |             |
| C4                 | 54.38              | 54.14                   | 0.24        |                 |                    |                         |             |
| C5                 | 29.13              | 29.43                   | 0.30        |                 |                    |                         |             |
| C6                 | 144.98             | 147.82                  | 2.84        |                 |                    |                         |             |
| C7                 | 36.17              | 38.13                   | 1.96        |                 |                    |                         |             |
| C8, 9, or 10       | 29                 | 29.60                   | 0.60        |                 |                    |                         |             |
|                    |                    | <b>MAD =</b>            | <b>1.22</b> |                 |                    |                         |             |

**Full Gaussian09 Citation:**

Gaussian 09, Revision D.01, Frisch, M. J.; Trucks, G. W.; Schlegel, H. B.; Scuseria, G. E.; Robb, M. A.; Cheeseman, J. R.; Scalmani, G.; Barone, V.; Mennucci, B.; Petersson, G. A.; Nakatsuji, H.; Caricato, M.; Li, X.; Hratchian, H. P.; Izmaylov, A. F.; Bloino, J.; Zheng, G.; Sonnenberg, J. L.; Hada, M.; Ehara, M.; Toyota, K.; Fukuda, R.; Hasegawa, J.; Ishida, M.; Nakajima, T.; Honda, Y.; Kitao, O.; Nakai, H.; Vreven, T.; Montgomery, J. A., Jr.; Peralta, J. E.; Ogliaro, F.; Bearpark, M.; Heyd, J. J.; Brothers, E.; Kudin, K. N.; Staroverov, V. N.; Kobayashi, R.; Normand, J.; Raghavachari, K.; Rendell, A.; Burant, J. C.; Iyengar, S. S.; Tomasi, J.; Cossi, M.; Rega, N.; Millam, N. J.; Klene, M.; Knox, J. E.; Cross, J. B.; Bakken, V.; Adamo, C.; Jaramillo, J.; Gomperts, R.; Stratmann, R. E.; Yazyev, O.; Austin, A. J.; Cammi, R.; Pomelli, C.; Ochterski, J. W.; Martin, R. L.; Morokuma, K.; Zakrzewski, V. G.; Voth, G. A.; Salvador, P.; Dannenberg, J. J.; Dapprich, S.; Daniels, A. D.; Farkas, Ö.; Foresman, J. B.; Ortiz, J. V.; Cioslowski, J.; Fox, D. J. Gaussian, Inc., Wallingford CT, **2009**.

**STRUCTURAL COORDINATES:**

**COMPUTED 88-anti**

|   |             |             |             |
|---|-------------|-------------|-------------|
| C | -0.05421800 | 2.13271300  | -0.08932800 |
| C | -0.88148500 | 2.84476200  | 0.68553100  |
| C | -2.10833700 | 2.30174100  | 1.36050500  |
| C | -1.33350300 | 0.02411500  | 0.66504300  |
| C | -0.22529400 | 0.62286900  | -0.26758100 |
| H | -0.71995800 | 3.91147300  | 0.81506300  |
| H | -2.97602400 | 2.93557800  | 1.15052700  |
| C | -3.63247600 | 0.60595100  | 0.37580600  |
| C | -3.42474900 | -0.77401000 | -0.14737400 |
| C | -4.35344900 | -1.63938600 | -0.70951300 |
| C | -3.90507100 | -2.89378400 | -1.11979300 |
| C | -2.56072300 | -3.25044900 | -0.96649000 |
| C | -1.63587800 | -2.37005900 | -0.40058400 |
| C | -2.08680400 | -1.12097800 | 0.01084600  |
| H | -5.38955200 | -1.33284200 | -0.81566200 |
| H | -4.59974800 | -3.60086400 | -1.56209200 |
| H | -2.22897900 | -4.22995700 | -1.29774700 |
| H | -0.59152300 | -2.64925500 | -0.30844500 |
| N | -2.40905700 | 0.99488000  | 0.84550900  |
| O | -4.65989400 | 1.26413700  | 0.39417500  |
| H | -1.98500300 | 2.27407200  | 2.45489800  |
| C | 1.06673500  | 2.85725400  | -0.86860500 |
| C | 1.55450800  | 2.03379000  | -2.07251400 |
| C | 0.55464300  | 4.19290900  | -1.43928000 |
| C | 2.25231400  | 3.15439600  | 0.06698300  |
| H | 2.00156800  | 1.07467200  | -1.79654100 |
| H | 0.73963000  | 1.82960000  | -2.77522100 |
| H | 2.32426700  | 2.59975800  | -2.60736700 |
| H | 0.30097400  | 4.90879000  | -0.65349700 |
| H | 1.33495500  | 4.65184600  | -2.05634600 |
| H | -0.33336700 | 4.03979400  | -2.06070100 |
| H | 3.06250900  | 3.63818400  | -0.49240600 |
| H | 1.93908100  | 3.82967800  | 0.86989100  |
| H | 2.63526400  | 2.24144500  | 0.52645500  |
| C | -0.79124700 | -0.38046300 | 2.04472900  |
| H | -1.62606000 | -0.65800500 | 2.69386400  |
| H | -0.11556000 | -1.23759900 | 1.96568200  |
| H | -0.23008300 | 0.44344000  | 2.49746100  |
| B | 1.11343100  | -0.21285900 | -0.07675800 |
| O | 1.43631500  | -1.29223700 | -0.86176700 |
| O | 2.04118500  | 0.00939400  | 0.90768100  |
| C | 2.57559300  | -1.96106500 | -0.27492800 |
| C | 3.17103600  | -0.86363200 | 0.68274200  |
| C | 3.50700400  | -2.40044700 | -1.39457000 |
| C | 2.04055300  | -3.18534700 | 0.46584900  |

|   |             |             |             |
|---|-------------|-------------|-------------|
| C | 3.64822000  | -1.38811700 | 2.02922500  |
| C | 4.27110600  | -0.02206300 | 0.03701900  |
| H | 4.41570600  | -2.85330600 | -0.98427700 |
| H | 3.00077000  | -3.14505400 | -2.01421000 |
| H | 3.78759800  | -1.56041500 | -2.03240300 |
| H | 1.51511000  | -3.82735300 | -0.24690700 |
| H | 2.85119900  | -3.76321800 | 0.91870600  |
| H | 1.33629400  | -2.90142100 | 1.25393800  |
| H | 4.46407100  | -2.10622900 | 1.89575900  |
| H | 4.01968800  | -0.55354400 | 2.62938400  |
| H | 2.83935900  | -1.87073700 | 2.58101200  |
| H | 4.52879600  | 0.79968600  | 0.71060300  |
| H | 5.17089900  | -0.61736500 | -0.14245300 |
| H | 3.94358400  | 0.41154400  | -0.91230100 |
| H | -0.55093900 | 0.44317900  | -1.30246300 |

COMPUTED 88-*syn*

|   |             |             |             |
|---|-------------|-------------|-------------|
| C | -2.37857700 | -0.50007700 | 0.14170100  |
| C | -2.41153300 | -1.05183000 | 1.36034900  |
| C | -1.25894400 | -1.76120900 | 2.01755000  |
| C | -0.26826600 | -1.79883100 | -0.31709000 |
| C | -1.07708800 | -0.51379200 | -0.64893700 |
| H | -3.32171700 | -1.03475000 | 1.95176100  |
| H | -1.59529900 | -2.74917700 | 2.36588100  |
| C | 1.16643900  | -1.76682500 | 1.58593600  |
| C | 2.01132600  | -1.69813700 | 0.35898800  |
| C | 3.39351800  | -1.62620800 | 0.24881200  |
| C | 3.93928500  | -1.55740700 | -1.03329300 |
| C | 3.10899000  | -1.55544300 | -2.16070800 |
| C | 1.71954000  | -1.62688100 | -2.03568500 |
| C | 1.18004500  | -1.70211800 | -0.75615500 |
| H | 4.01272500  | -1.62587600 | 1.14087500  |
| H | 5.01556100  | -1.50155500 | -1.16303900 |
| H | 3.55357200  | -1.49232700 | -3.14932700 |
| H | 1.08530300  | -1.61761500 | -2.91816600 |
| N | -0.12044700 | -1.89729600 | 1.13638900  |
| O | 1.52517100  | -1.71748500 | 2.75043000  |
| H | -0.91569100 | -1.21455600 | 2.90451000  |
| C | -0.94338200 | -3.04940500 | -0.89075000 |
| H | -1.96069200 | -3.14706500 | -0.50106000 |
| H | -0.99655600 | -2.98258700 | -1.98214700 |
| H | -0.37041200 | -3.94032200 | -0.62003000 |
| C | -3.59038600 | 0.15702200  | -0.51772200 |
| C | -3.20483500 | 1.55002600  | -1.04475800 |
| C | -4.05797200 | -0.72065900 | -1.69375700 |
| C | -4.76390500 | 0.31742900  | 0.45392200  |
| H | -2.85329100 | 2.18921000  | -0.22612900 |
| H | -2.41547300 | 1.50637400  | -1.80106200 |
| H | -4.07707600 | 2.03232300  | -1.49891400 |
| H | -4.36109000 | -1.71061300 | -1.33683500 |
| H | -4.91715000 | -0.25601600 | -2.19014300 |
| H | -3.27440400 | -0.85412400 | -2.44604700 |
| H | -5.59263700 | 0.82109600  | -0.05380100 |
| H | -5.13302000 | -0.65052100 | 0.80757600  |
| H | -4.48176400 | 0.91980700  | 1.32375900  |
| B | -0.20777700 | 0.76409900  | -0.30357700 |
| O | 0.29156700  | 0.98512600  | 0.95080300  |
| O | 0.15841500  | 1.72835100  | -1.20567600 |
| C | 0.92263400  | 2.28451800  | 0.95100600  |
| C | 1.19063900  | 2.52770100  | -0.57561600 |
| C | 2.17056900  | 2.20925700  | 1.81593400  |

|   |             |             |             |
|---|-------------|-------------|-------------|
| C | -0.08663600 | 3.26334100  | 1.54680400  |
| C | 1.03947800  | 3.97057500  | -1.02705700 |
| C | 2.52648400  | 1.95451700  | -1.04109000 |
| H | 2.72784800  | 3.15117100  | 1.77255700  |
| H | 1.88079300  | 2.02177300  | 2.85308300  |
| H | 2.82108900  | 1.39140200  | 1.49884800  |
| H | -0.36759000 | 2.91127600  | 2.54263400  |
| H | 0.33579500  | 4.26855000  | 1.63554400  |
| H | -0.99162700 | 3.31516600  | 0.93341500  |
| H | 1.75224000  | 4.61254300  | -0.49852500 |
| H | 1.24443500  | 4.04017000  | -2.09871600 |
| H | 0.02897400  | 4.34114500  | -0.84592900 |
| H | 2.55752900  | 1.97840400  | -2.13393500 |
| H | 3.36810400  | 2.53562800  | -0.65198700 |
| H | 2.63899600  | 0.91444600  | -0.71987000 |
| H | -1.28120700 | -0.51413100 | -1.72636300 |

COMPUTED 89-anti

|   |             |             |             |
|---|-------------|-------------|-------------|
| C | 0.03126100  | 2.01966000  | -0.39947200 |
| C | -0.75842300 | 2.73273100  | 0.41225000  |
| C | -1.94478000 | 2.20608500  | 1.17512300  |
| C | -1.21540000 | -0.06833700 | 0.38917500  |
| C | -0.13121800 | 0.51422700  | -0.55708400 |
| H | -0.57904300 | 3.79891600  | 0.53830600  |
| H | -2.81858000 | 2.82795000  | 0.94513900  |
| C | -3.53666500 | 0.43266000  | 0.45662800  |
| C | -3.36380400 | -0.93881400 | -0.10293900 |
| C | -4.33559000 | -1.82903500 | -0.53834200 |
| C | -3.90921400 | -3.04815100 | -1.06306800 |
| C | -2.54433900 | -3.34381300 | -1.15095700 |
| C | -1.57428400 | -2.44109200 | -0.70837500 |
| C | -2.00482500 | -1.23284300 | -0.17078500 |
| H | -5.38659600 | -1.56501400 | -0.47176000 |
| H | -4.63715400 | -3.77121100 | -1.41733200 |
| H | -2.23181000 | -4.29237900 | -1.57757500 |
| H | -0.51676700 | -2.66684700 | -0.80399000 |
| N | -2.26771000 | 0.88597600  | 0.68952200  |
| O | -4.57223400 | 1.04463000  | 0.66238500  |
| C | 1.13830600  | 2.73183500  | -1.20739400 |
| C | 1.76803500  | 1.82231400  | -2.27401500 |
| C | 0.54889900  | 3.94457900  | -1.94958300 |
| C | 2.24406400  | 3.21358400  | -0.25192900 |
| H | 2.29455400  | 0.96168500  | -1.84952100 |
| H | 1.02328800  | 1.44582300  | -2.98233200 |
| H | 2.50869200  | 2.39507700  | -2.84149700 |
| H | 0.14632900  | 4.68985100  | -1.25926400 |
| H | 1.32718100  | 4.43154700  | -2.54795000 |
| H | -0.25926000 | 3.63469400  | -2.62014400 |
| H | 3.05588100  | 3.68633400  | -0.81769200 |
| H | 1.84913800  | 3.94726700  | 0.45771600  |
| H | 2.65101300  | 2.37707200  | 0.32271600  |
| B | 1.18667500  | -0.28573600 | -0.19604200 |
| O | 1.58841300  | -1.44338200 | -0.81718200 |
| O | 1.97228400  | 0.03000700  | 0.88249000  |
| C | 2.56930800  | -2.07870200 | 0.03831100  |
| C | 3.09874600  | -0.87792700 | 0.89502600  |
| C | 3.61779300  | -2.75233900 | -0.83160800 |
| C | 1.82055400  | -3.11794200 | 0.87044500  |
| C | 3.42865500  | -1.22314200 | 2.33878800  |
| C | 4.27476600  | -0.14908200 | 0.24816300  |

|   |             |             |             |
|---|-------------|-------------|-------------|
| H | 4.41675700  | -3.17263700 | -0.21159000 |
| H | 3.15498500  | -3.56753100 | -1.39388300 |
| H | 4.05476200  | -2.05043800 | -1.54375600 |
| H | 1.34910200  | -3.83922600 | 0.19728000  |
| H | 2.49797300  | -3.65992600 | 1.53623200  |
| H | 1.03562200  | -2.64948400 | 1.47367800  |
| H | 4.22300100  | -1.97587000 | 2.38071800  |
| H | 3.77843100  | -0.32544400 | 2.85508000  |
| H | 2.55311800  | -1.60283400 | 2.86839200  |
| H | 4.46900300  | 0.77177400  | 0.80437500  |
| H | 5.17936000  | -0.76367400 | 0.26693300  |
| H | 4.05799300  | 0.11951900  | -0.78991100 |
| H | -0.41942600 | 0.28490900  | -1.59163500 |
| H | -0.74022600 | -0.36614200 | 1.33951300  |
| C | -1.72302200 | 2.21753300  | 2.69268100  |
| H | -1.48732400 | 3.22927000  | 3.03632400  |
| H | -2.62566300 | 1.87388100  | 3.20488300  |
| H | -0.88438700 | 1.56596200  | 2.95832000  |

COMPUTED 89-*anti*; different stereochemistry at C2

|   |             |             |             |
|---|-------------|-------------|-------------|
| C | 0.06799800  | 2.01774100  | 0.25236300  |
| C | 0.93009100  | 2.60804800  | -0.58257800 |
| C | 2.17011400  | 1.99824400  | -1.19125000 |
| C | 1.19454800  | -0.14842100 | -0.37834300 |
| C | 0.12915600  | 0.52113800  | 0.51431400  |
| H | 0.81746400  | 3.66860700  | -0.80074200 |
| C | 3.55177400  | -0.02020900 | -0.53718200 |
| C | 3.18409900  | -1.35156300 | 0.02271100  |
| C | 4.02379500  | -2.39092500 | 0.39798600  |
| C | 3.43651100  | -3.53102500 | 0.94384500  |
| C | 2.04897600  | -3.60179100 | 1.11073200  |
| C | 1.21376200  | -2.55153900 | 0.72185100  |
| C | 1.80275400  | -1.42496400 | 0.15750900  |
| H | 5.09808500  | -2.29624600 | 0.27216600  |
| H | 4.05641500  | -4.36606800 | 1.25454800  |
| H | 1.61207600  | -4.48992700 | 1.55764400  |
| H | 0.14208000  | -2.60724900 | 0.88059900  |
| N | 2.37365100  | 0.68671700  | -0.59952400 |
| O | 4.66695100  | 0.35289400  | -0.86122300 |
| C | -1.01074700 | 2.86715000  | 0.95783700  |
| C | -1.73437100 | 2.09136400  | 2.06998100  |
| C | -0.35771500 | 4.09165400  | 1.62425400  |
| C | -2.04845600 | 3.34757200  | -0.07105000 |
| H | -2.30808600 | 1.23692500  | 1.69845900  |
| H | -1.03827000 | 1.72215600  | 2.83012400  |
| H | -2.44708800 | 2.75807000  | 2.56628400  |
| H | 0.12140000  | 4.74770900  | 0.89327900  |
| H | -1.11671600 | 4.67890400  | 2.15312600  |
| H | 0.40358800  | 3.77960200  | 2.34677100  |
| H | -2.83695900 | 3.92600900  | 0.42535300  |
| H | -1.57833800 | 3.98680100  | -0.82497000 |
| H | -2.50368700 | 2.49922600  | -0.58847900 |
| B | -1.23928700 | -0.20095100 | 0.15818500  |
| O | -1.80153500 | -1.22576100 | 0.87924800  |
| O | -1.93012000 | 0.06807500  | -0.99480600 |
| C | -2.81760500 | -1.84146800 | 0.05035000  |
| C | -3.15297600 | -0.70418500 | -0.97759200 |
| C | -3.97884200 | -2.26578000 | 0.93461600  |
| C | -2.17772600 | -3.06439600 | -0.60412000 |
| C | -3.44166300 | -1.18638100 | -2.39086800 |

|   |             |             |             |
|---|-------------|-------------|-------------|
| C | -4.27063200 | 0.22317200  | -0.50596000 |
| H | -4.79461000 | -2.67152600 | 0.32689100  |
| H | -3.64385700 | -3.04529000 | 1.62392200  |
| H | -4.35837500 | -1.42908800 | 1.52369400  |
| H | -1.82812700 | -3.74431000 | 0.17790500  |
| H | -2.89673600 | -3.60123300 | -1.22923200 |
| H | -1.31820600 | -2.78330000 | -1.22154500 |
| H | -4.32032700 | -1.83994400 | -2.40190400 |
| H | -3.64728700 | -0.32459200 | -3.03105300 |
| H | -2.59230800 | -1.72800200 | -2.81047000 |
| H | -4.33418700 | 1.07521300  | -1.18792300 |
| H | -5.23547100 | -0.29203400 | -0.50448700 |
| H | -4.07852500 | 0.60671400  | 0.50040400  |
| H | 0.38000300  | 0.32978200  | 1.56631200  |
| H | 0.74100100  | -0.34527700 | -1.36643300 |
| C | 3.35036000  | 2.94198000  | -0.93917400 |
| H | 4.25970800  | 2.58657600  | -1.41978400 |
| H | 3.53259300  | 3.02540700  | 0.13666900  |
| H | 3.09449600  | 3.93252200  | -1.32688100 |
| H | 2.03753200  | 1.88744800  | -2.28165500 |

COMPUTED 89-syn:

|   |             |             |             |
|---|-------------|-------------|-------------|
| C | -2.31918200 | 0.51238700  | -0.31363400 |
| C | -2.48846000 | 1.52452200  | 0.54715500  |
| C | -1.43004200 | 2.49185200  | 1.00783900  |
| C | -0.13887800 | 1.56851500  | -0.95833100 |
| C | -0.96483800 | 0.26702000  | -0.95798800 |
| H | -3.45907800 | 1.68080700  | 1.01330800  |
| C | 1.04711900  | 2.43419800  | 0.90680300  |
| C | 2.03668300  | 1.92659700  | -0.08829800 |
| C | 3.42280400  | 1.91404800  | -0.01665100 |
| C | 4.12022000  | 1.32357600  | -1.06972600 |
| C | 3.43304300  | 0.76146900  | -2.15310900 |
| C | 2.03790800  | 0.79149100  | -2.21983000 |
| C | 1.34738600  | 1.39358300  | -1.17362100 |
| H | 3.92926800  | 2.34221900  | 0.84319300  |
| H | 5.20500500  | 1.28932000  | -1.05032300 |
| H | 3.99490900  | 0.29462700  | -2.95649100 |
| H | 1.51506300  | 0.34623900  | -3.06178800 |
| N | -0.17670200 | 2.21219300  | 0.34227000  |
| O | 1.25909100  | 2.93717700  | 1.99892200  |
| C | -3.45036900 | -0.50012100 | -0.56898500 |
| C | -3.18134600 | -1.37689900 | -1.80161600 |
| C | -3.55277900 | -1.41558400 | 0.66544500  |
| C | -4.79660100 | 0.20911700  | -0.78150100 |
| H | -3.11322700 | -0.77685200 | -2.71592300 |
| H | -2.25963200 | -1.96064700 | -1.70329800 |
| H | -4.00862400 | -2.08234200 | -1.92993400 |
| H | -3.84089000 | -0.84040500 | 1.55036300  |
| H | -4.29612300 | -2.20426300 | 0.50105600  |
| H | -2.58939600 | -1.88959000 | 0.88266400  |
| H | -5.57857300 | -0.53206200 | -0.98008300 |
| H | -5.10463300 | 0.78246300  | 0.09660300  |
| H | -4.74616100 | 0.89356900  | -1.63430700 |
| H | -0.56126500 | 2.24580100  | -1.71657900 |
| B | -0.16080900 | -0.89989900 | -0.25202100 |
| O | 0.29036700  | -2.00771900 | -0.92265100 |
| O | 0.18849800  | -0.89163500 | 1.06985200  |
| C | 0.86475900  | -2.90629900 | 0.05561400  |
| C | 1.16283900  | -1.94732000 | 1.26106700  |

|   |             |             |             |
|---|-------------|-------------|-------------|
| C | 2.09449100  | -3.56358800 | -0.55107500 |
| C | -0.19634400 | -3.95935500 | 0.36659400  |
| C | 0.95104400  | -2.56431600 | 2.63357300  |
| C | 2.53957200  | -1.29416100 | 1.17356600  |
| H | 2.60822600  | -4.17777000 | 0.19609100  |
| H | 1.78959400  | -4.21132300 | -1.37747000 |
| H | 2.79166100  | -2.81819800 | -0.93775400 |
| H | -0.48797400 | -4.44932300 | -0.56633800 |
| H | 0.18554400  | -4.71732400 | 1.05678300  |
| H | -1.08862000 | -3.50577700 | 0.80713200  |
| H | 1.61696900  | -3.42266800 | 2.77271900  |
| H | 1.17994000  | -1.82200700 | 3.40255000  |
| H | -0.08171100 | -2.89104200 | 2.76977300  |
| H | 2.59336000  | -0.48786400 | 1.91075800  |
| H | 3.33529100  | -2.01643100 | 1.38017300  |
| H | 2.70852800  | -0.85723700 | 0.18376200  |
| H | -1.10433600 | -0.02072300 | -2.00617000 |
| H | -1.24822600 | 2.33074300  | 2.07927100  |
| C | -1.85199000 | 3.95200700  | 0.80597000  |
| H | -2.79248800 | 4.15513300  | 1.32747600  |
| H | -1.08080900 | 4.61771500  | 1.20145400  |
| H | -1.99653300 | 4.16034700  | -0.25900700 |

### Proton NMR

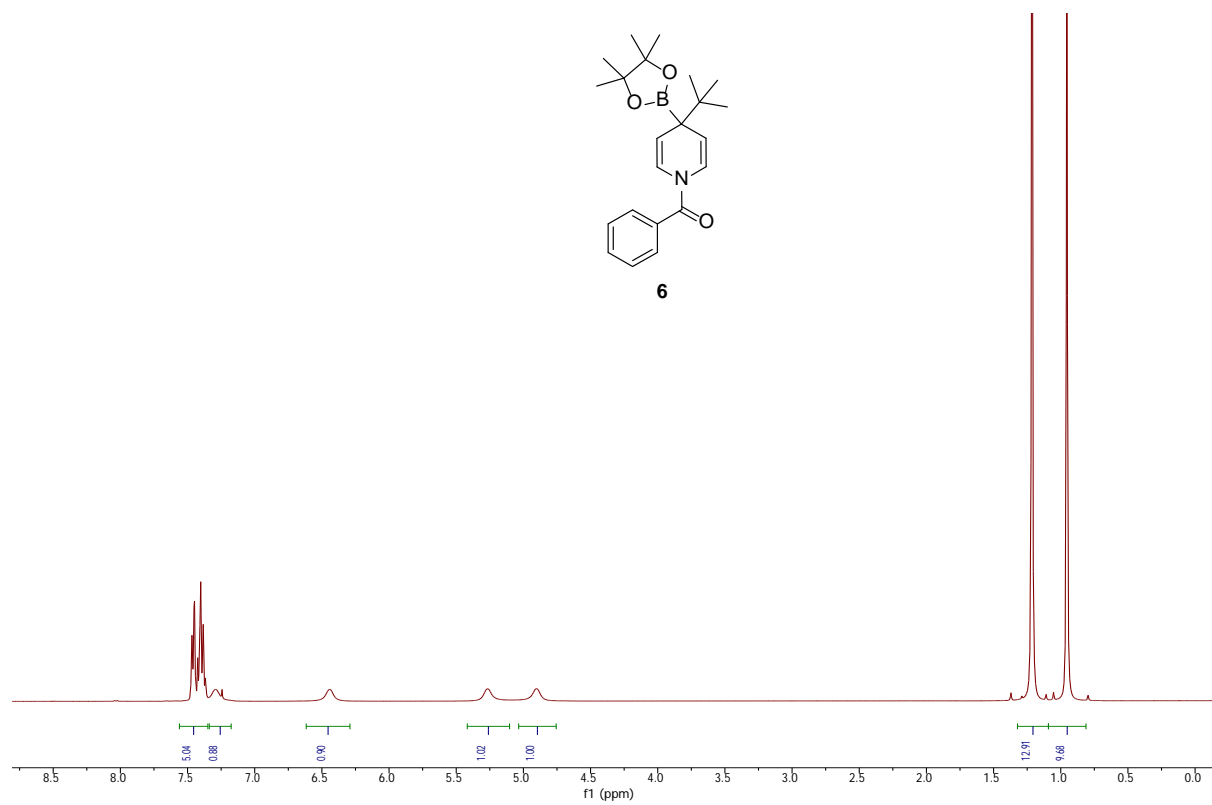

### Carbon NMR

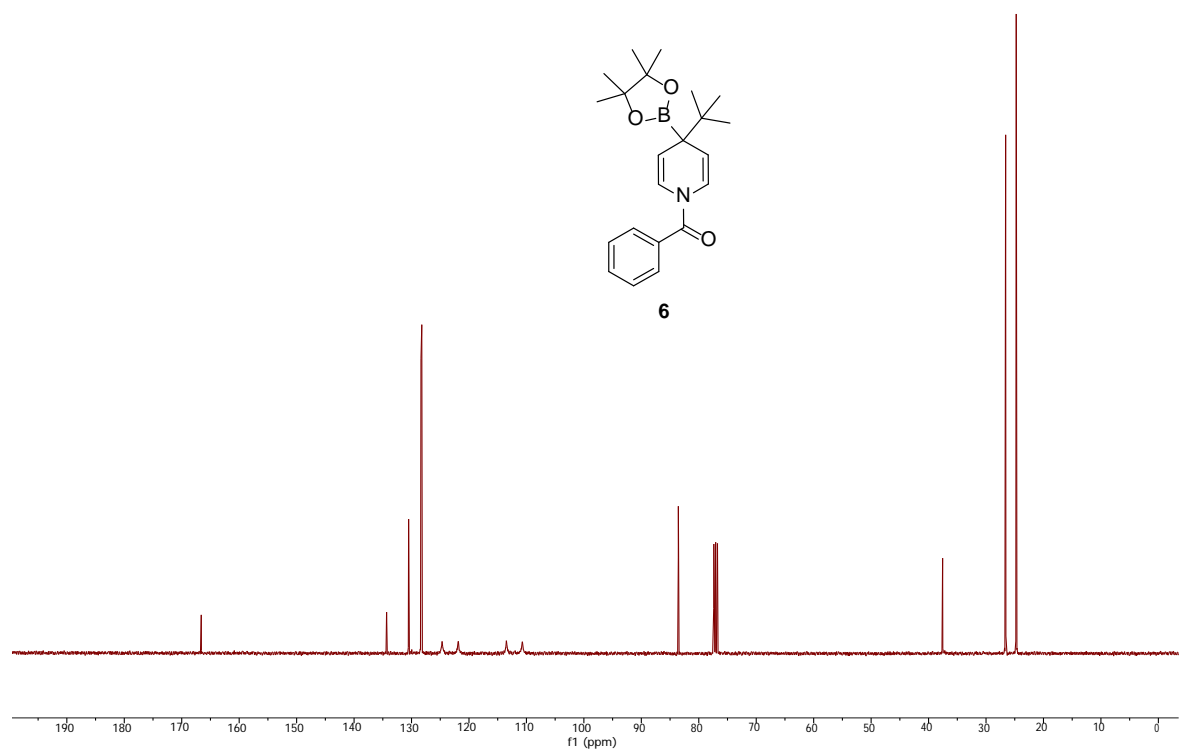



### Proton NMR

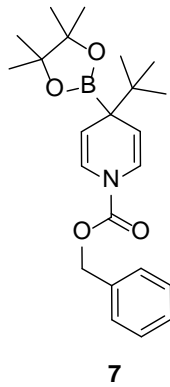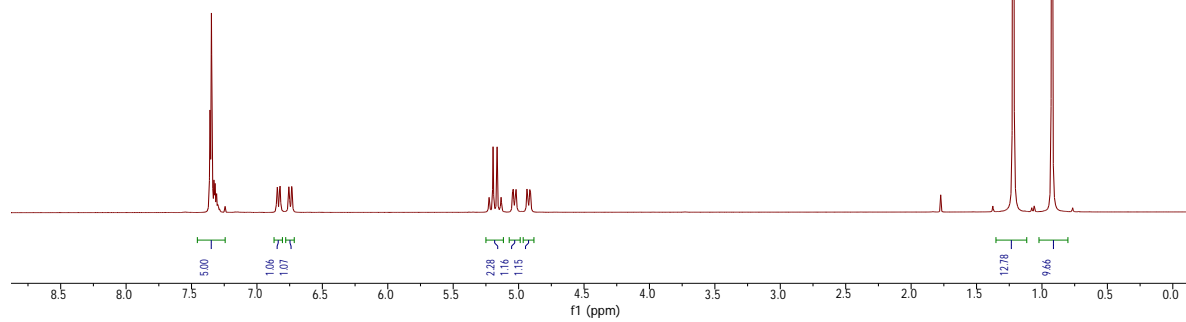

### Carbon NMR

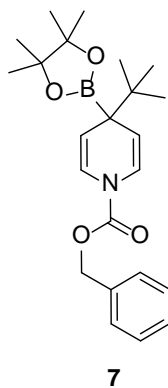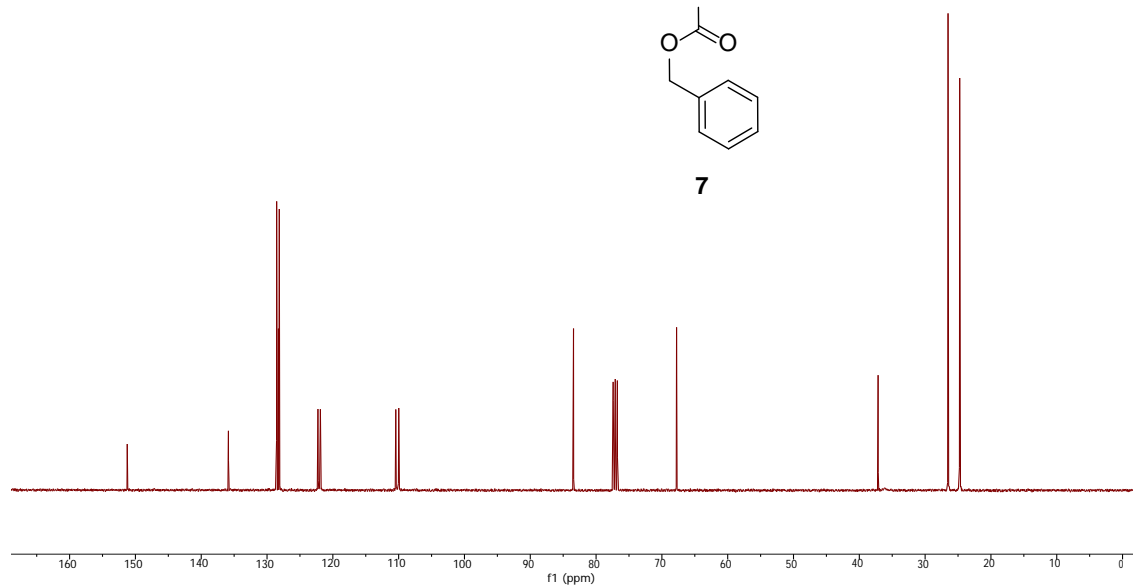

# Proton NMR

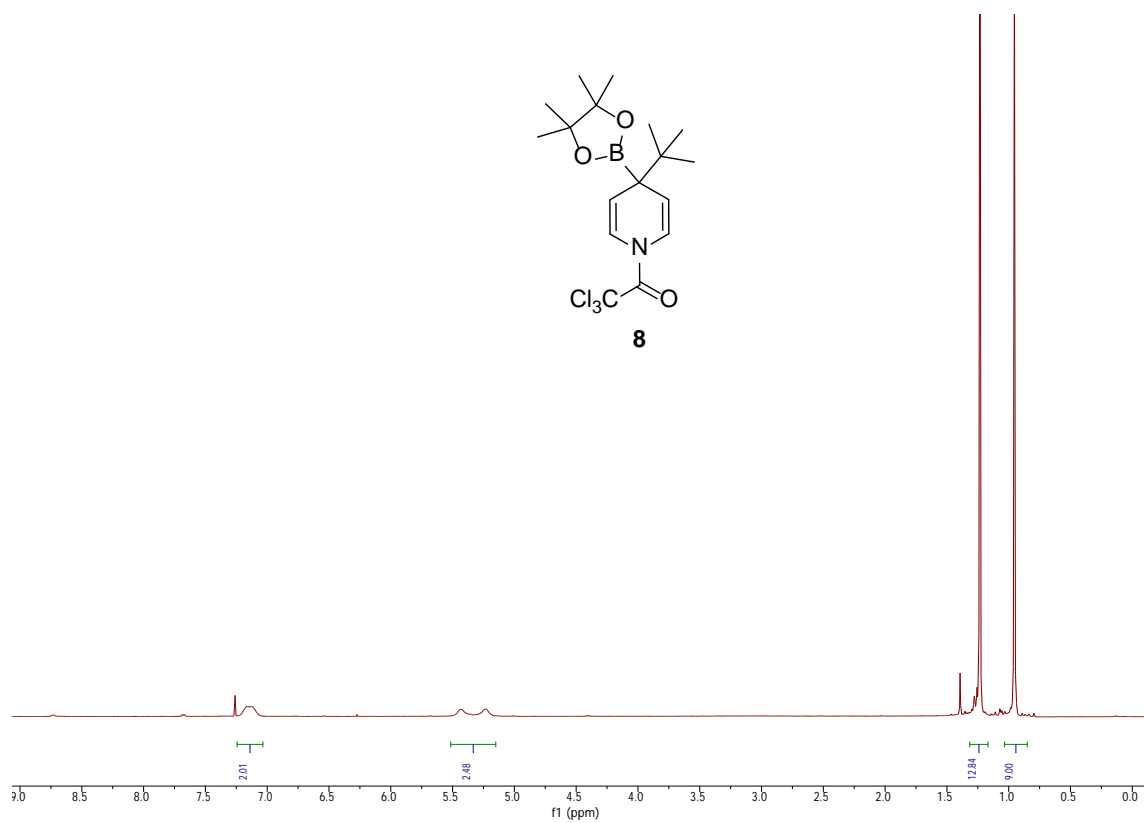

# Carbon NMR

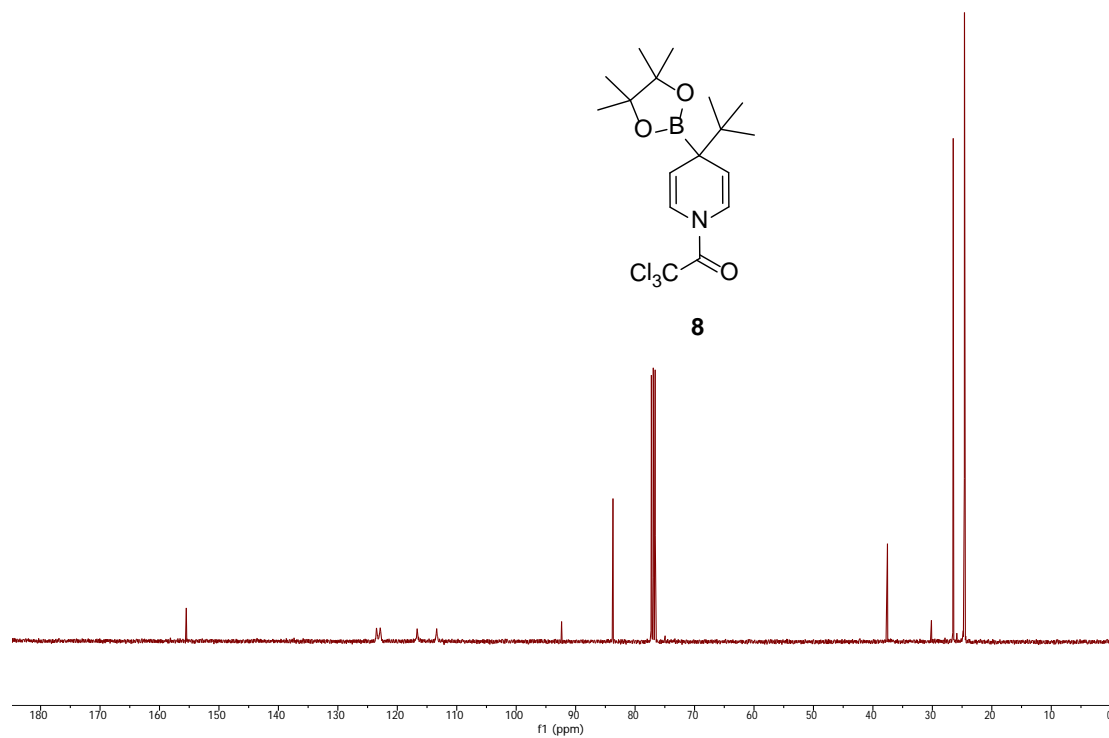

### Proton NMR

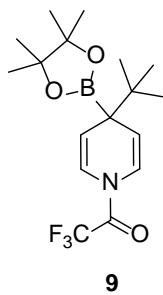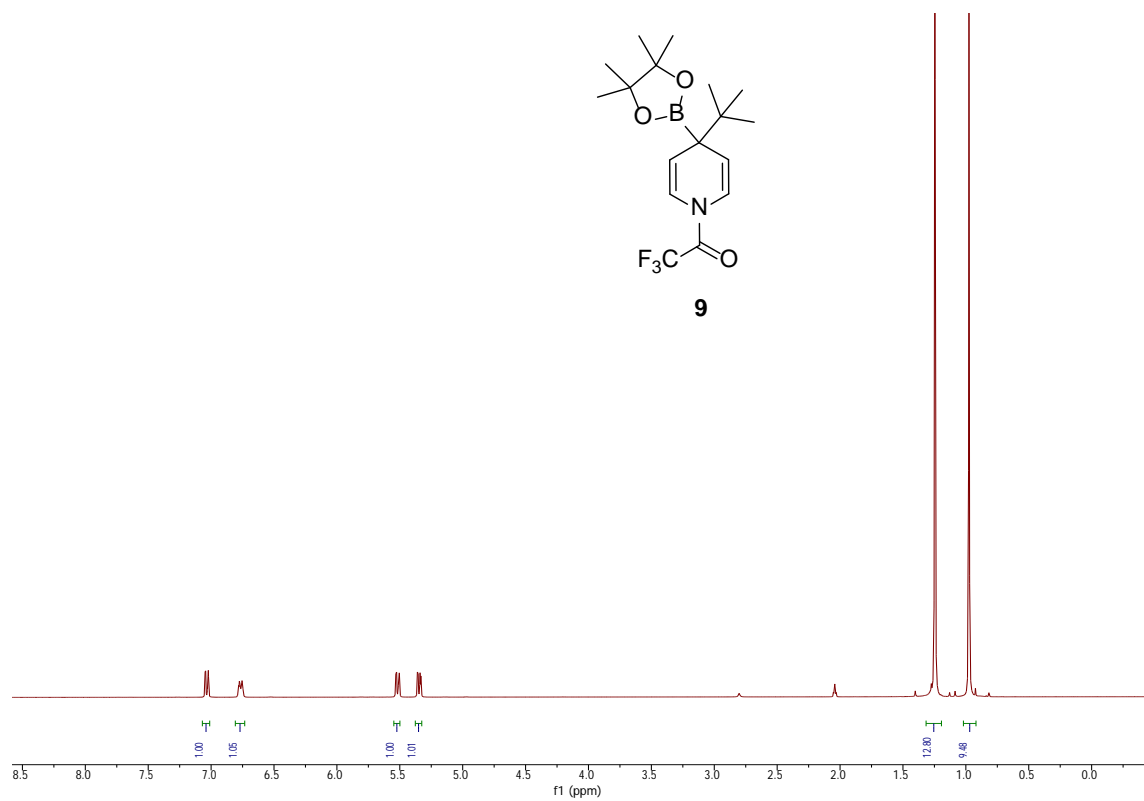

### Carbon NMR

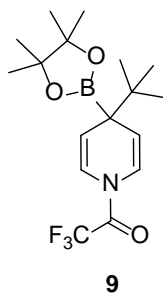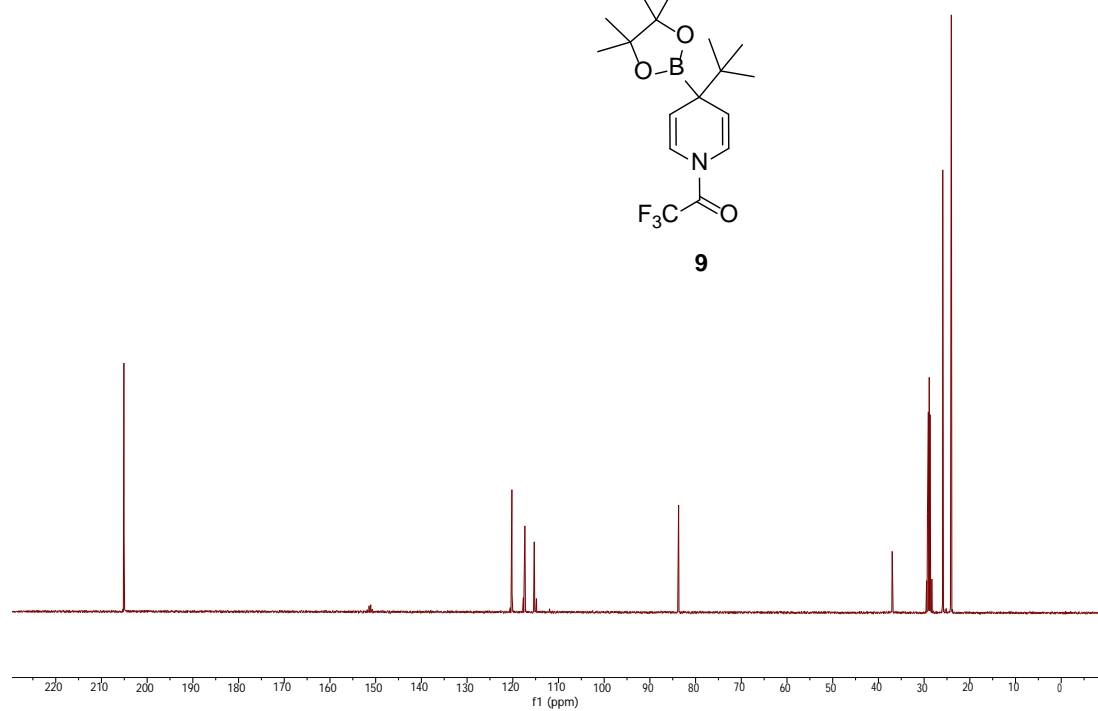

# Proton NMR

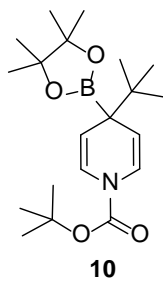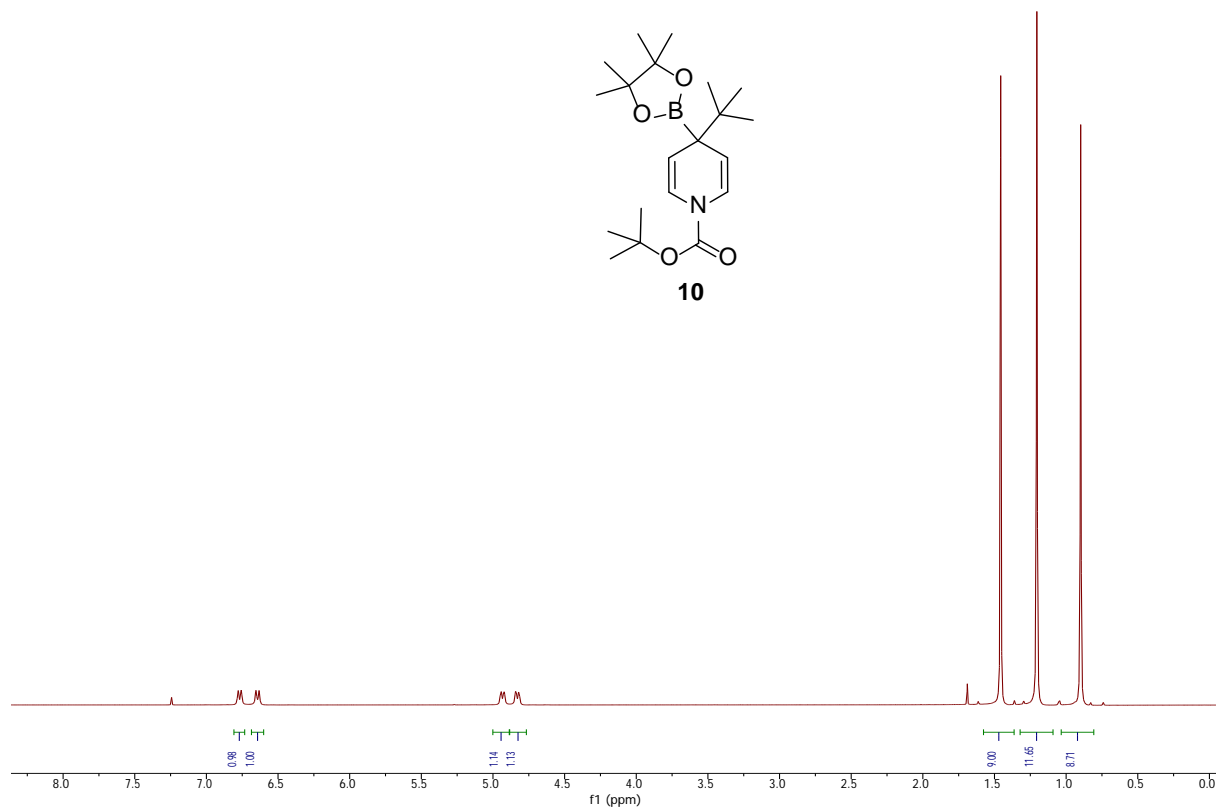

# Carbon NMR

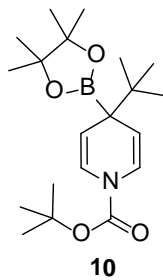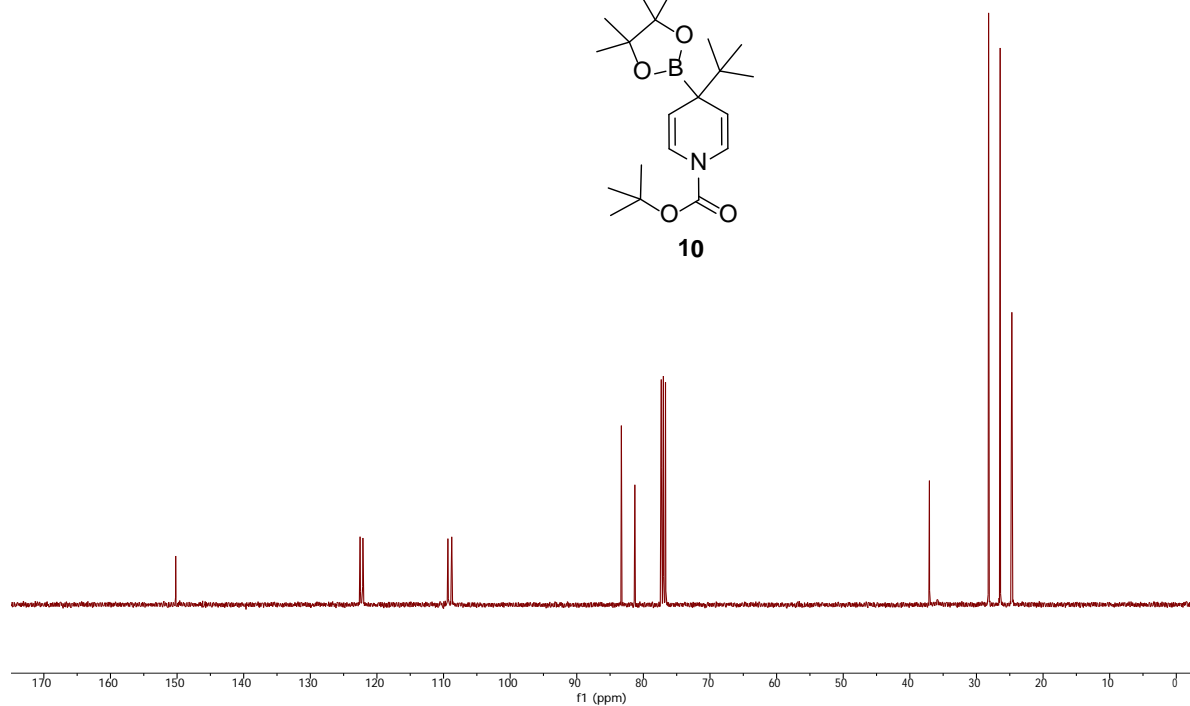

# Proton NMR

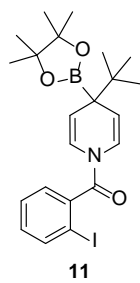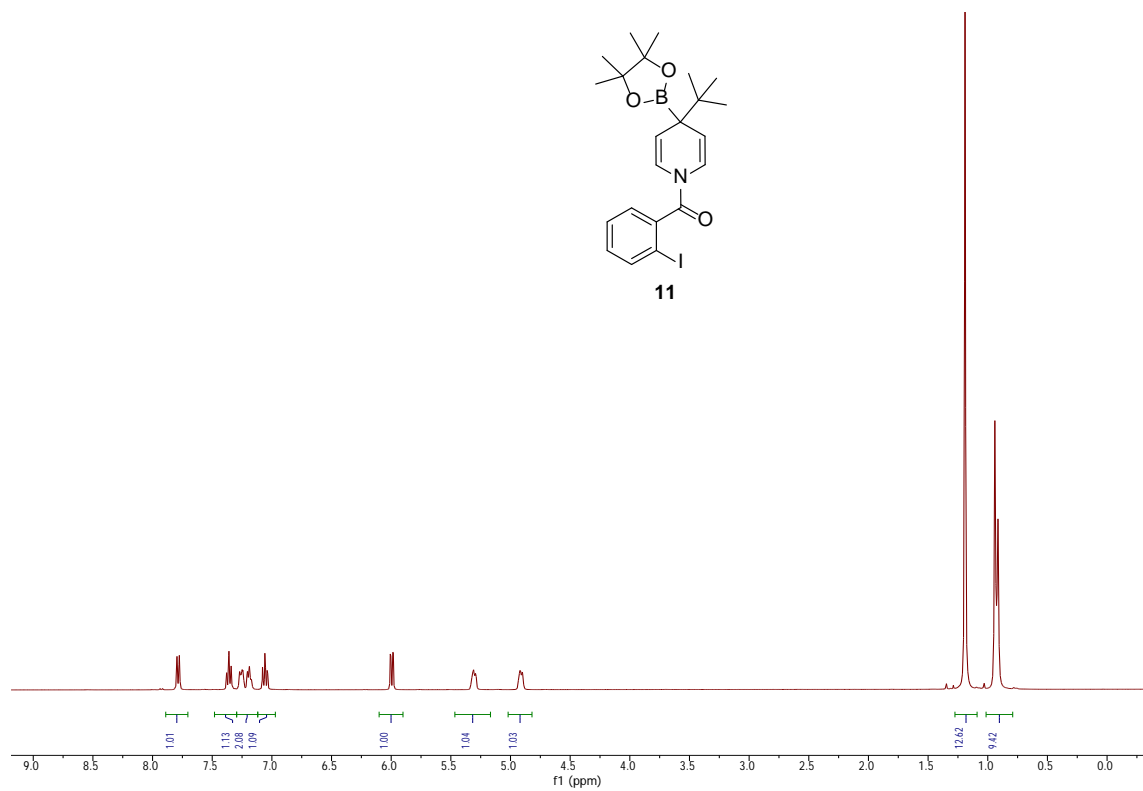

# Carbon NMR

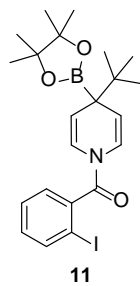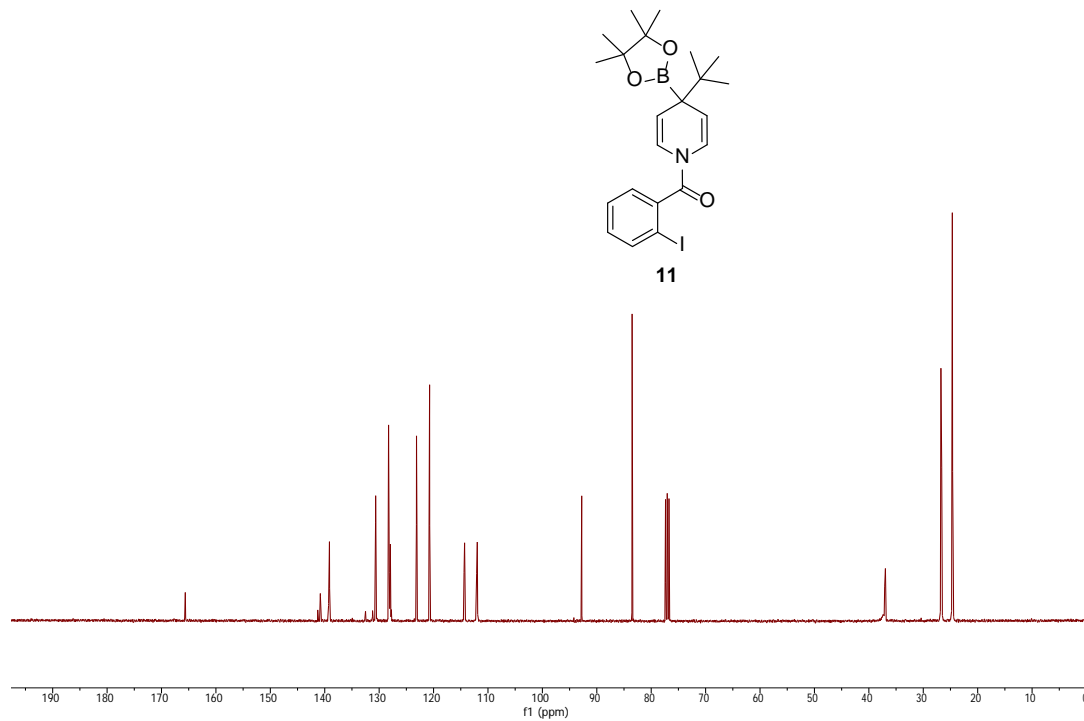

# Proton NMR

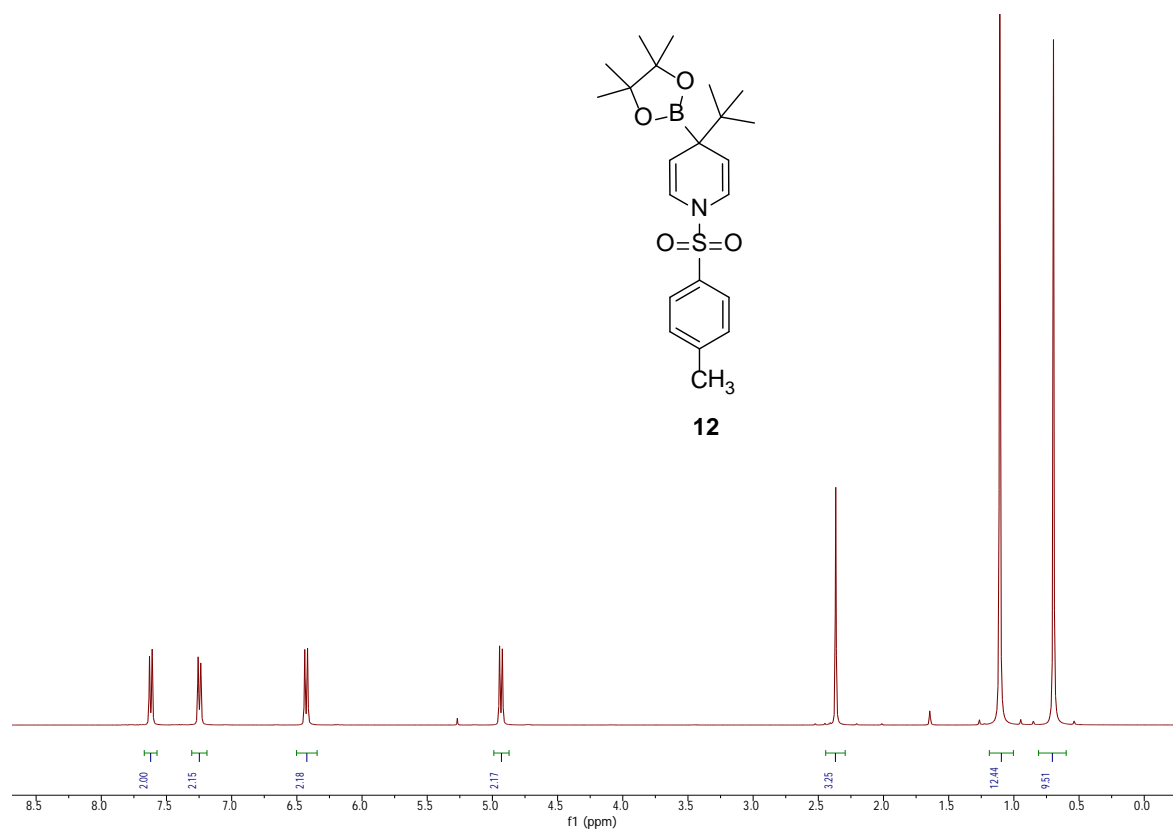

# Carbon NMR

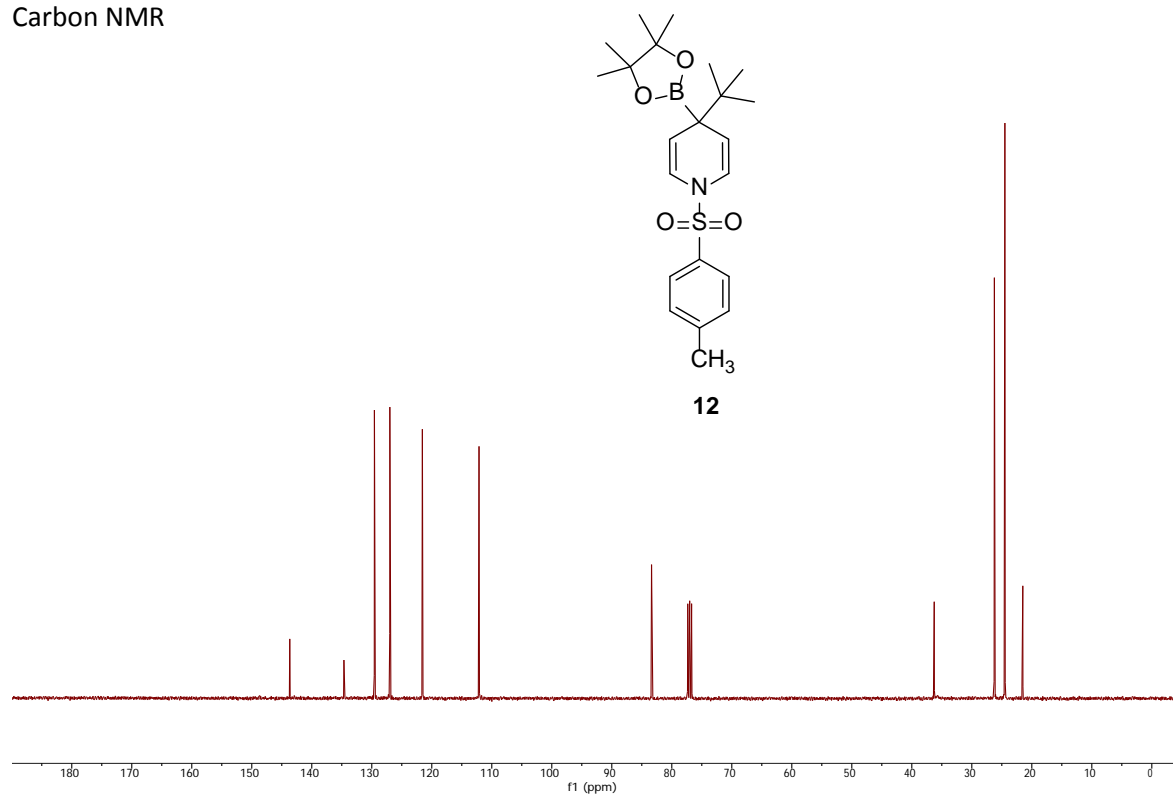

Proton NMR

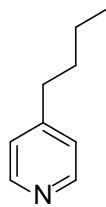

13

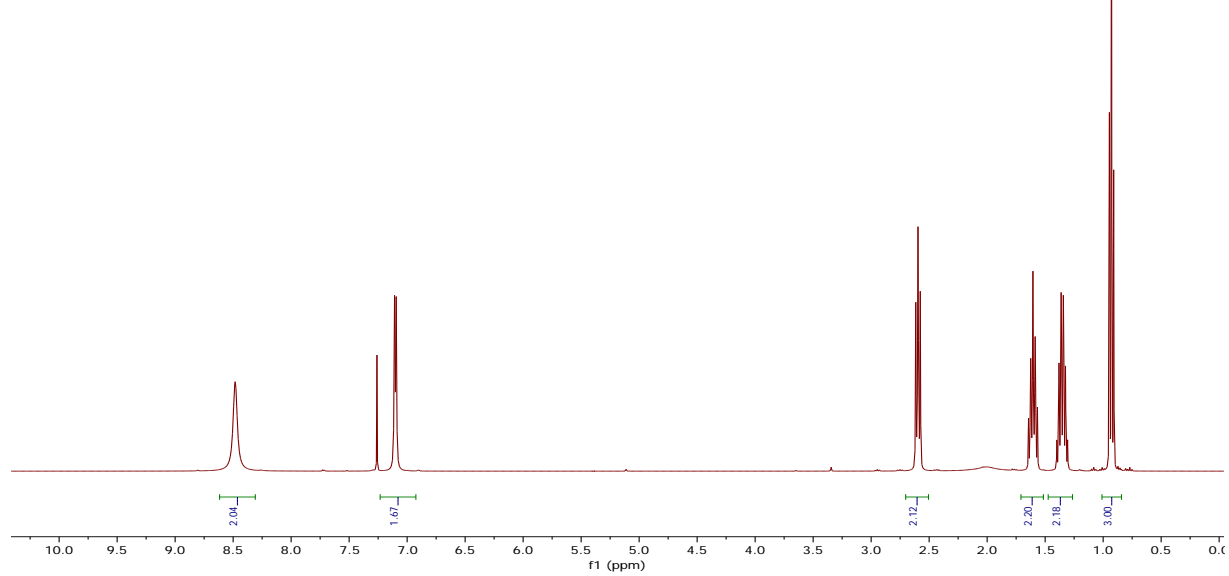

Carbon NMR

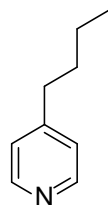

13

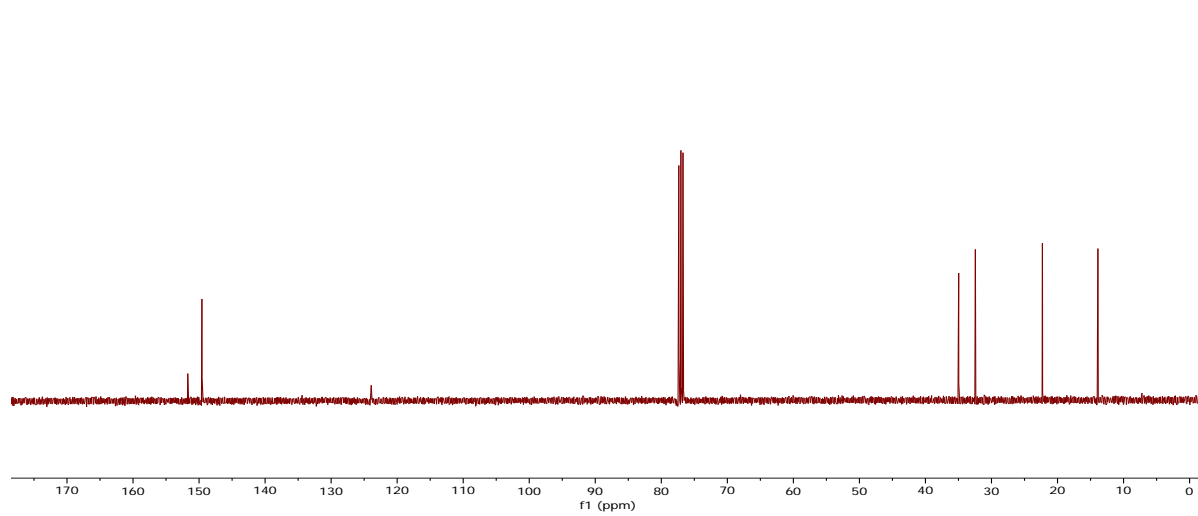

Proton NMR

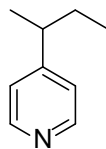

14

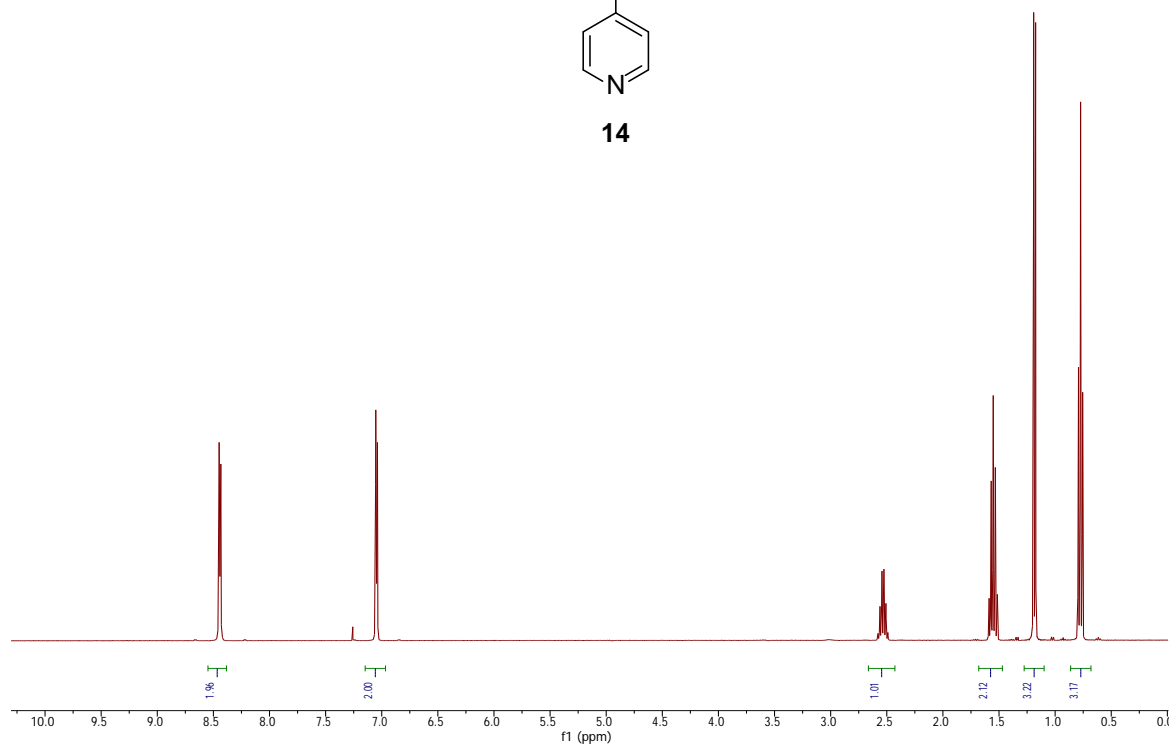

Carbon NMR

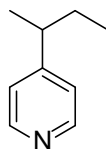

14

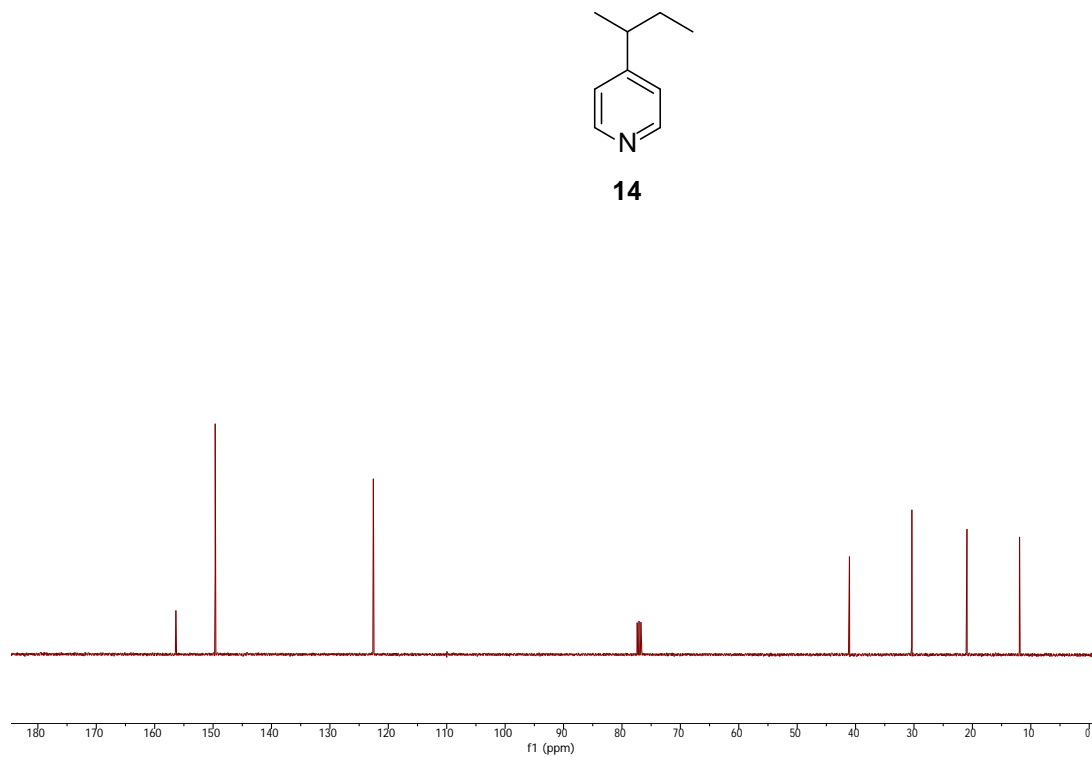



Proton NMR

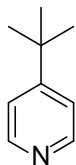

**15**

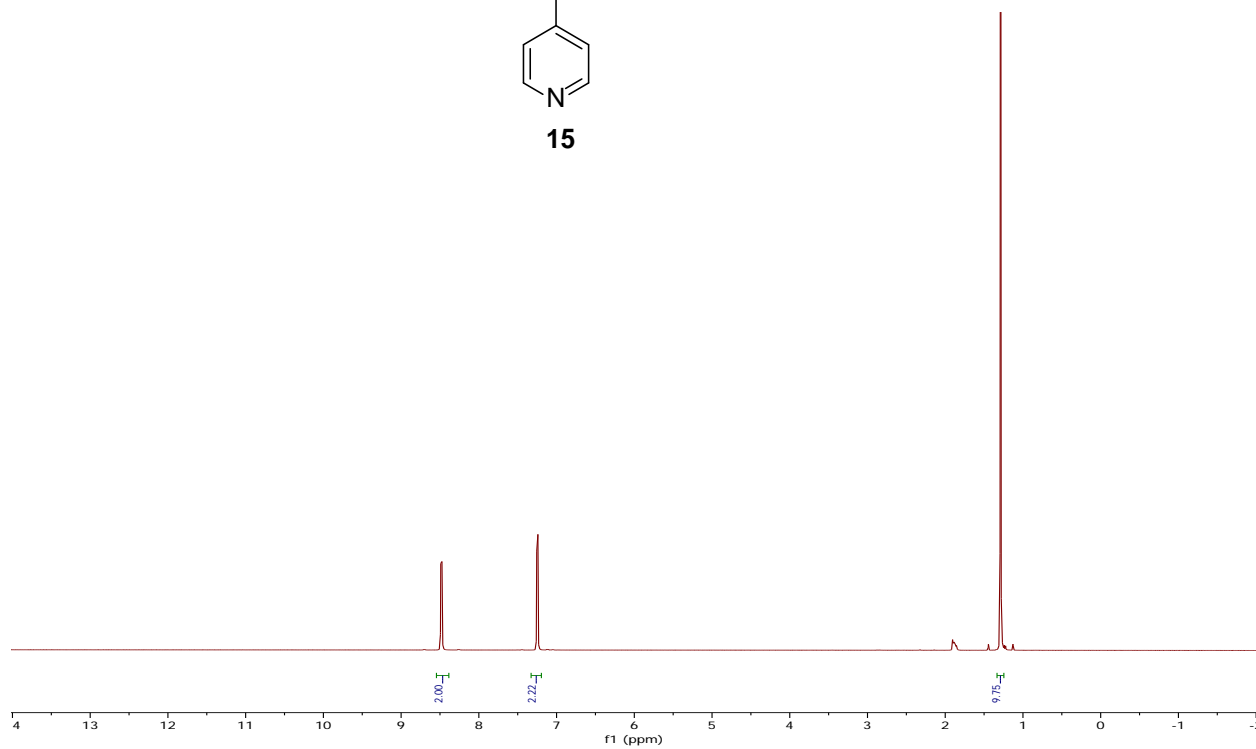

Carbon NMR

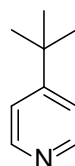

**15**

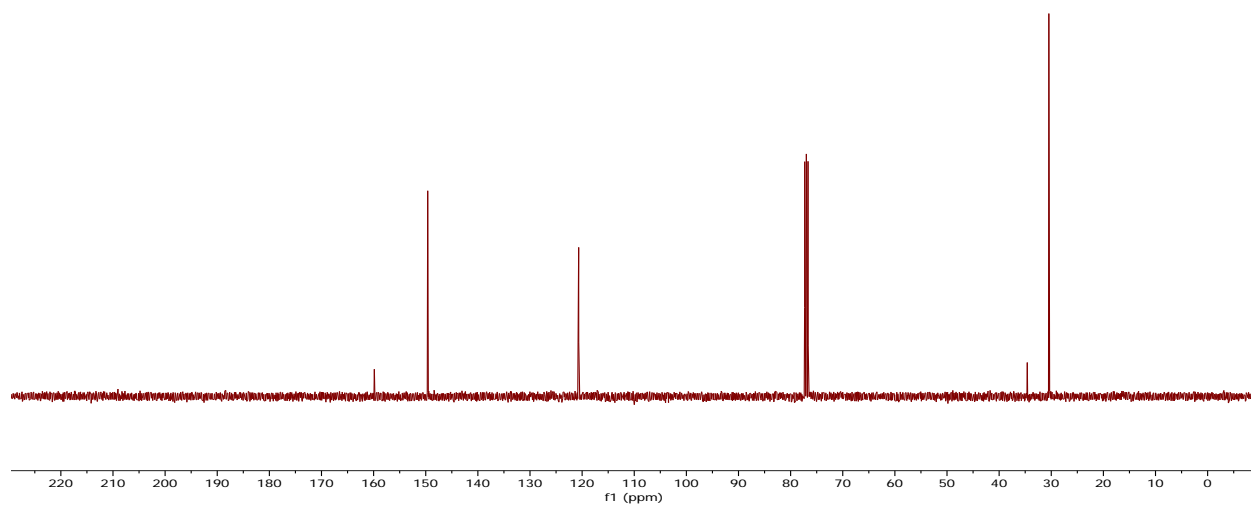

Proton NMR

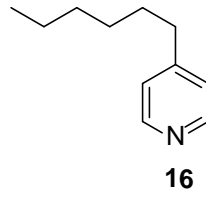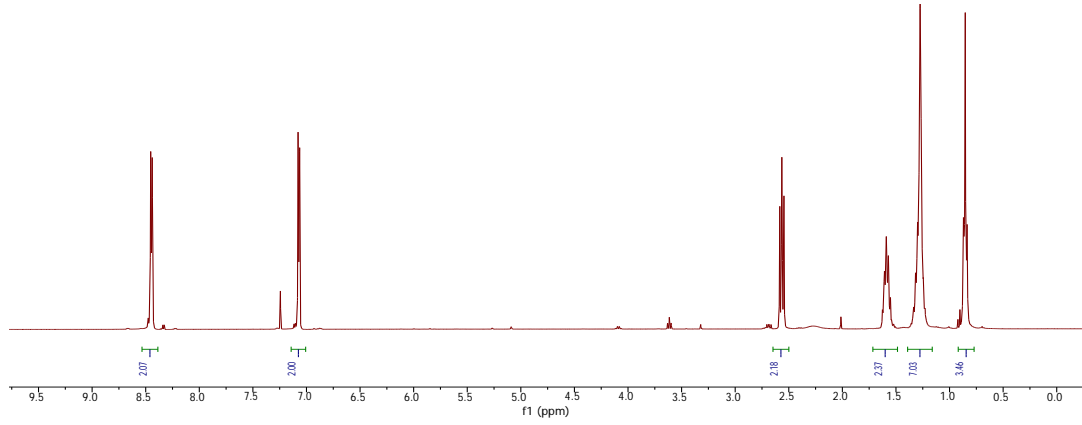

Carbon NMR

CARBON\_01

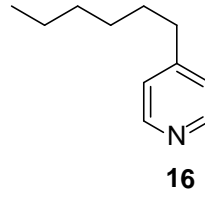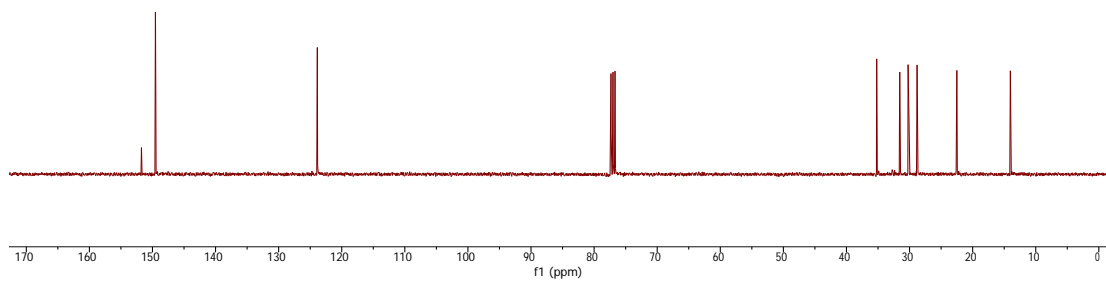

Proton NMR

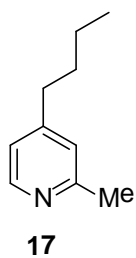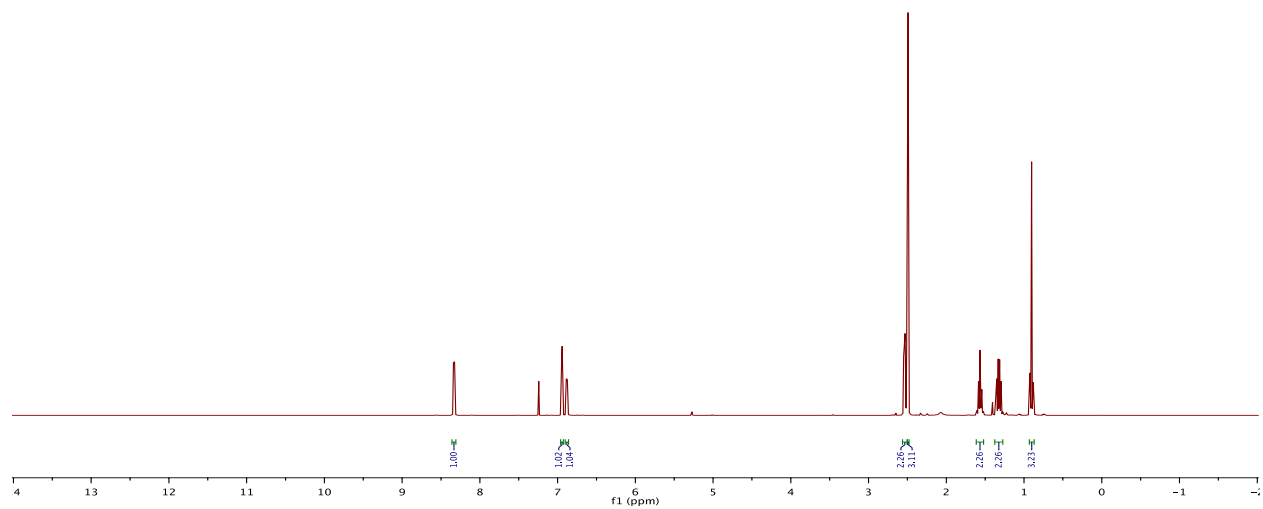

Carbon NMR

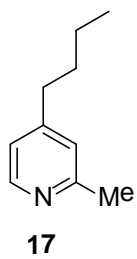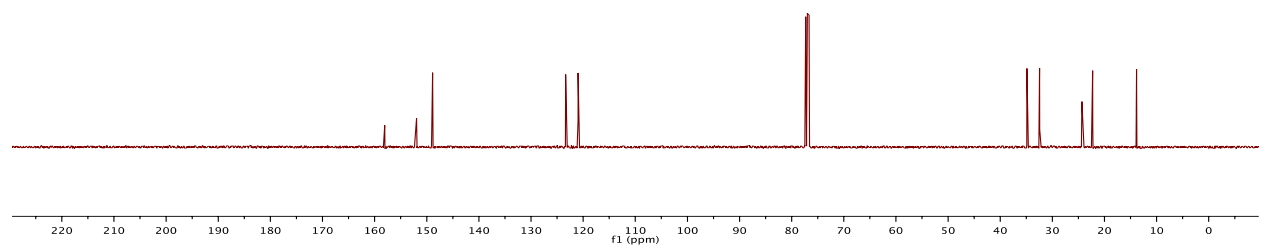

# Proton NMR

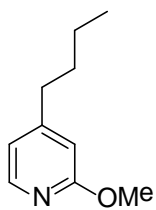

**18**

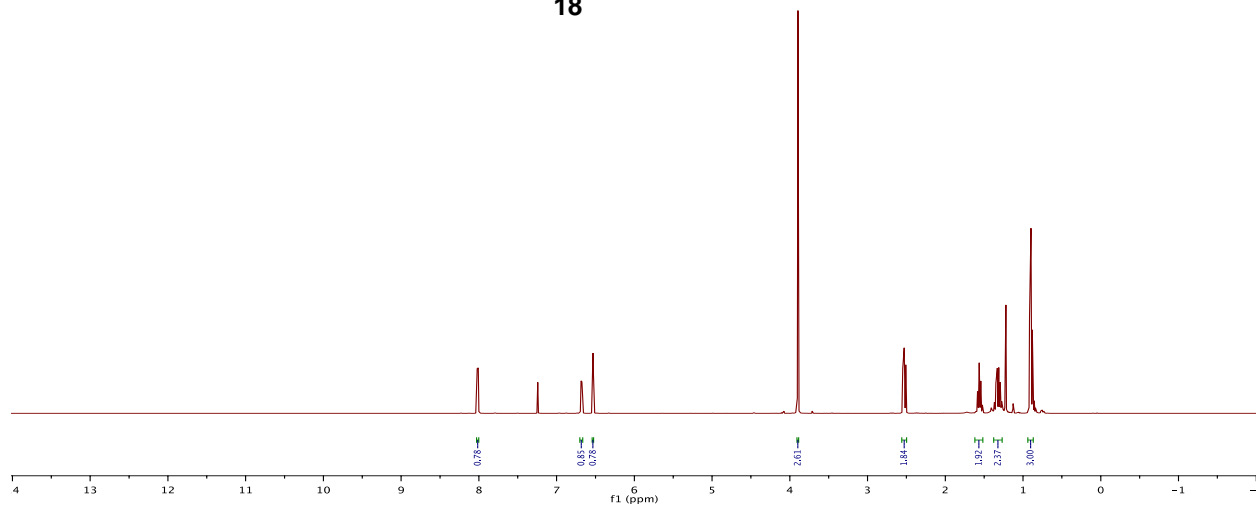

# Carbon NMR

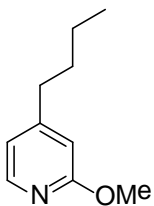

**18**

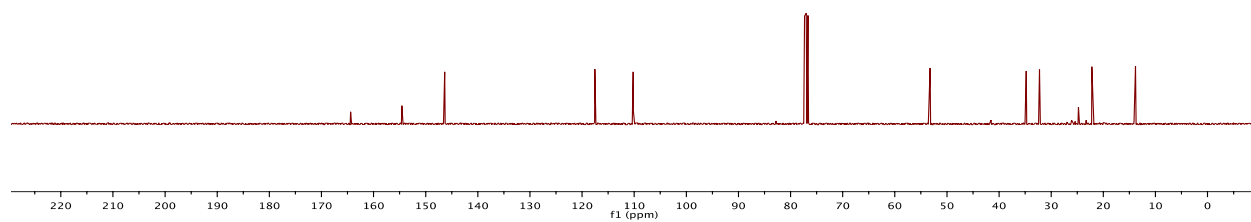

Proton NMR

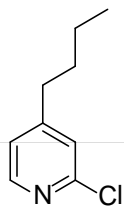

19

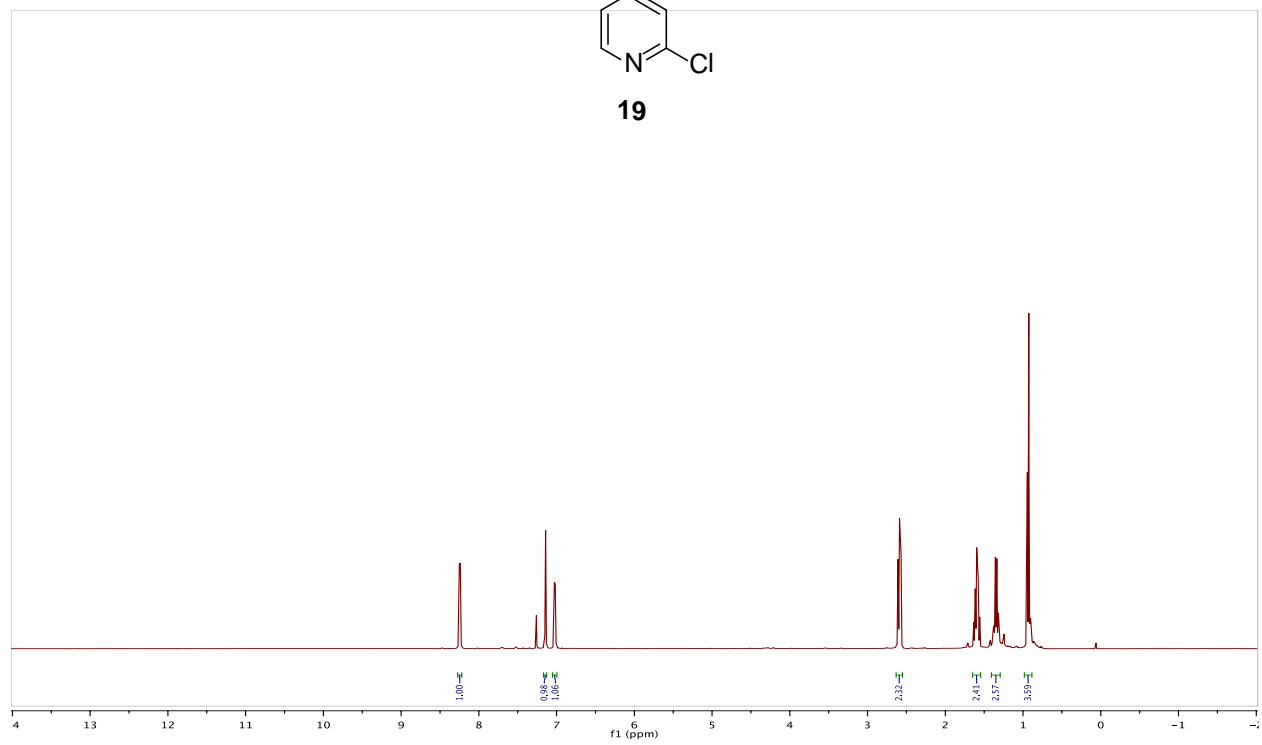

Carbon NMR

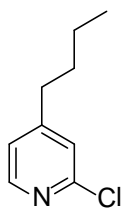

19

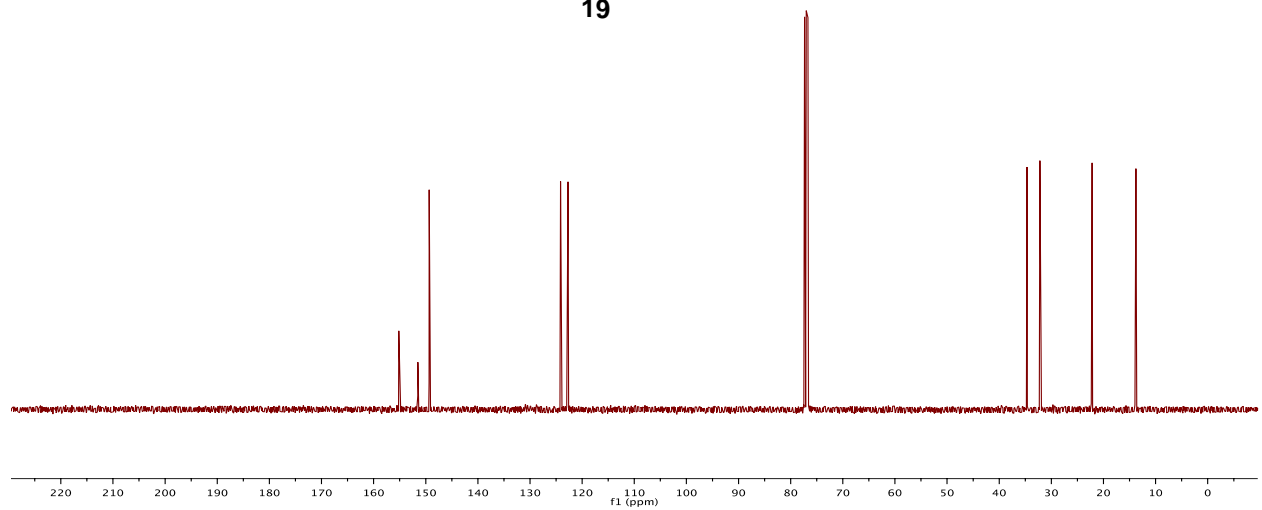

# Proton NMR

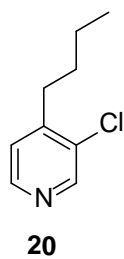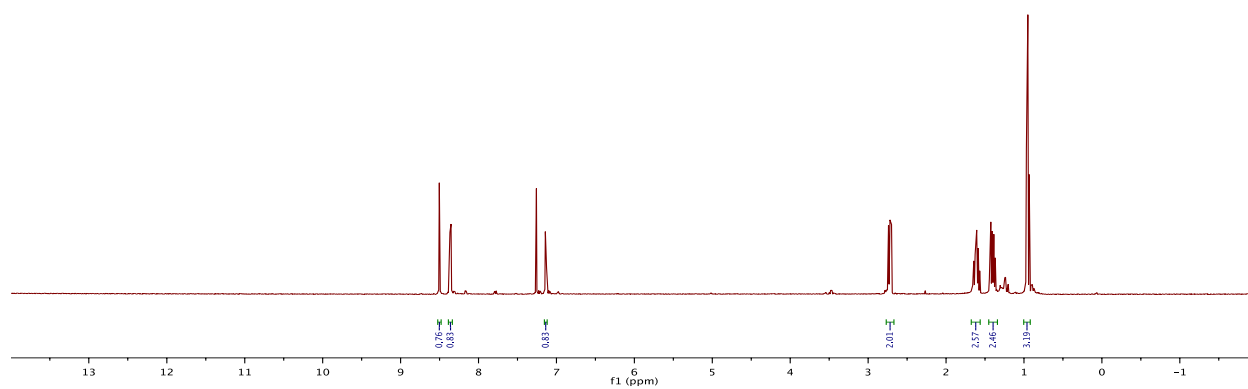

# Carbon NMR

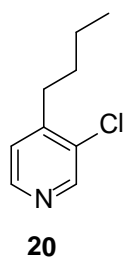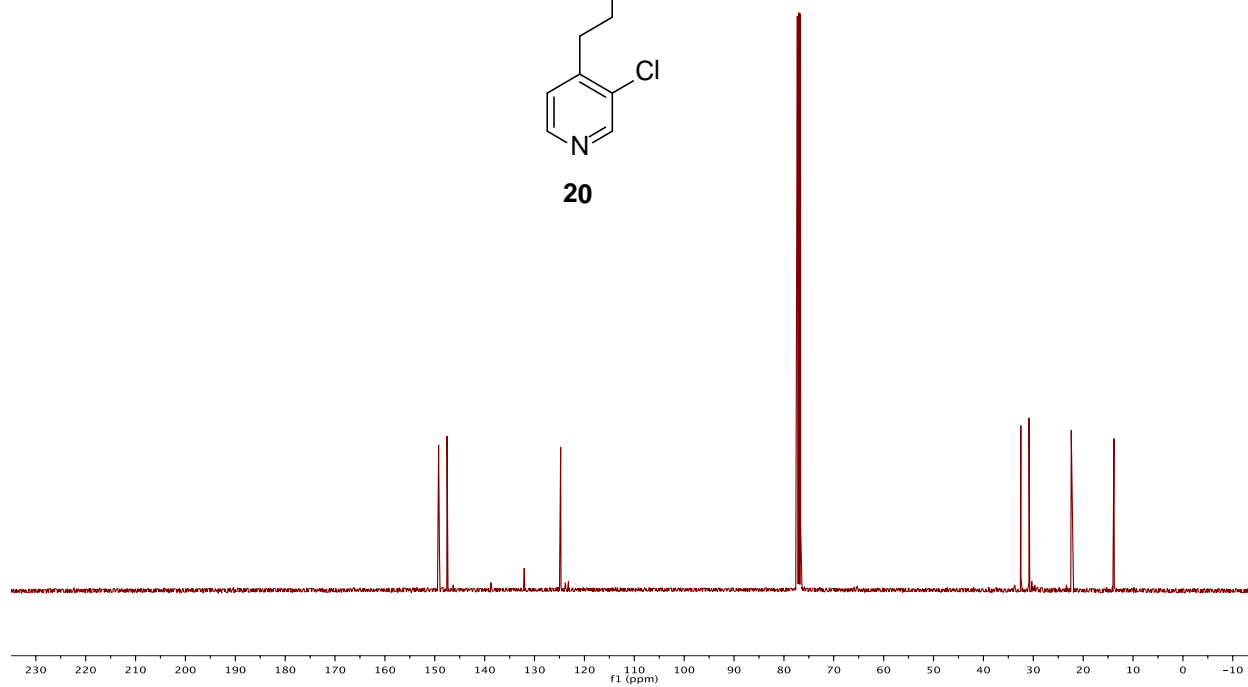

# Proton NMR

PROTON\_U1

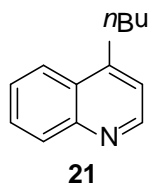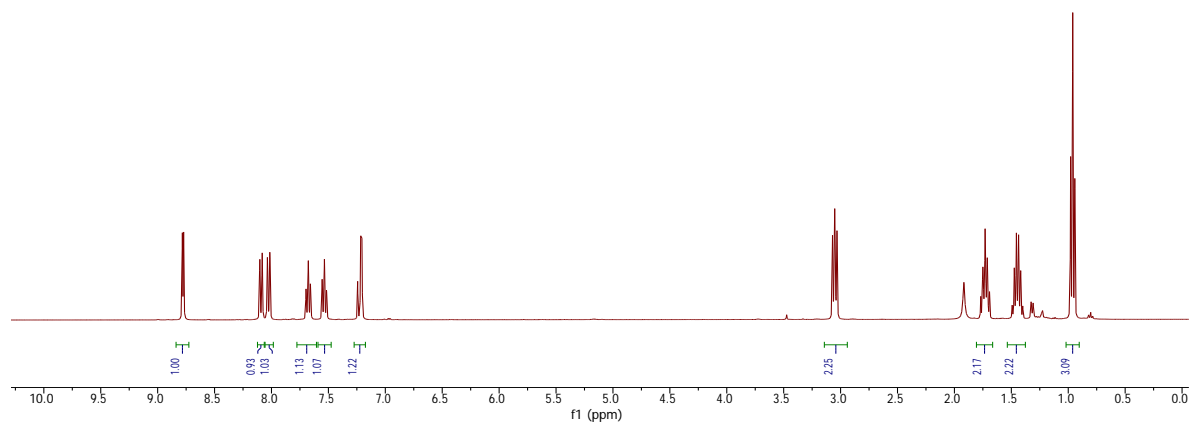

# Carbon NMR

CARBON\_U1

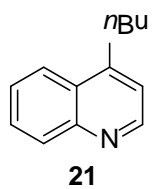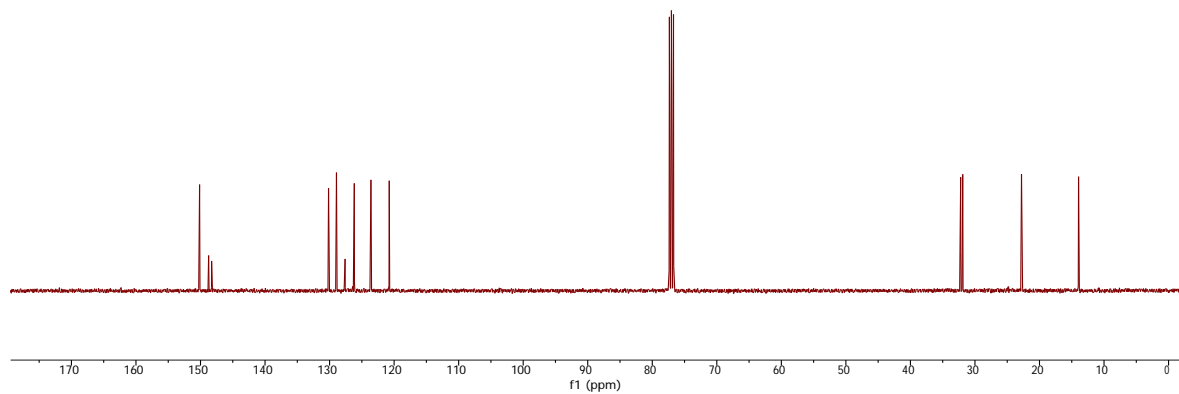

Proton NMR

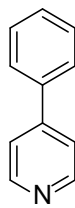

22

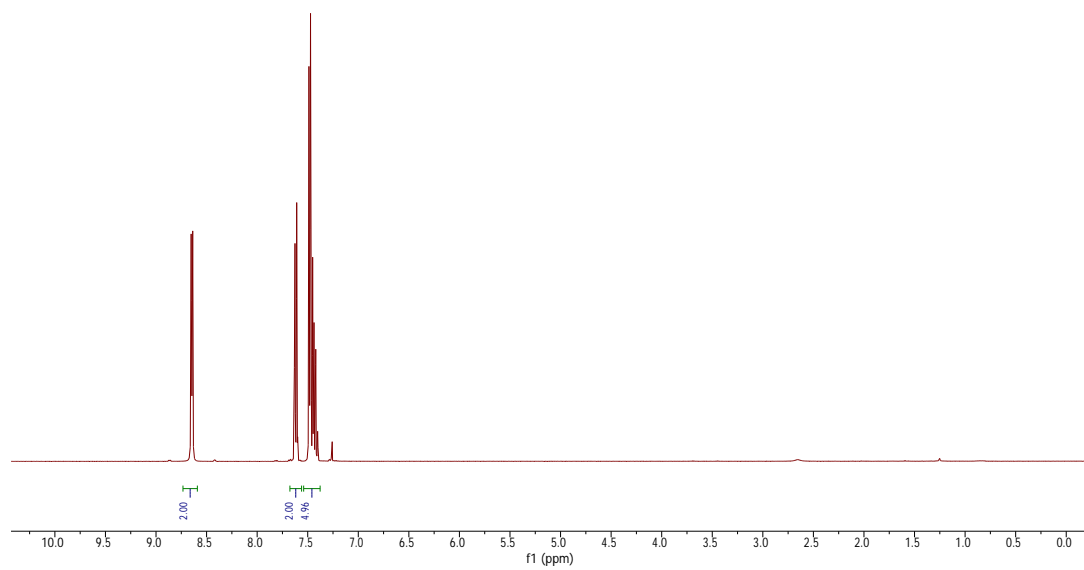

Carbon NMR

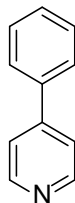

22

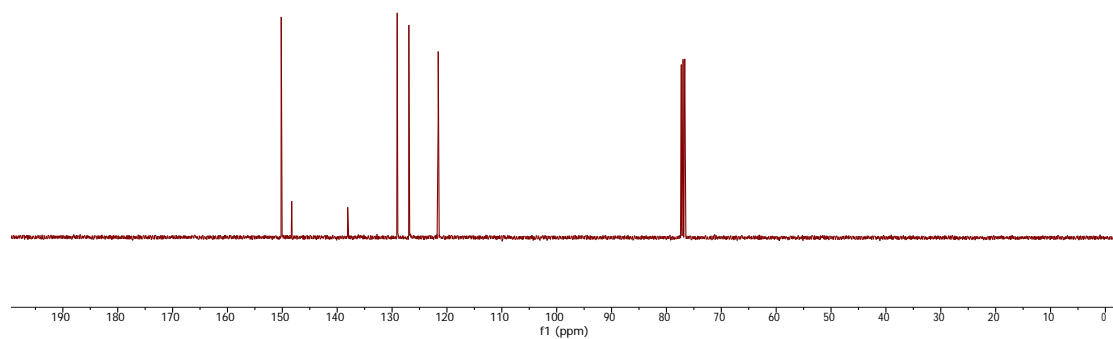



Proton NMR

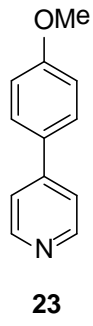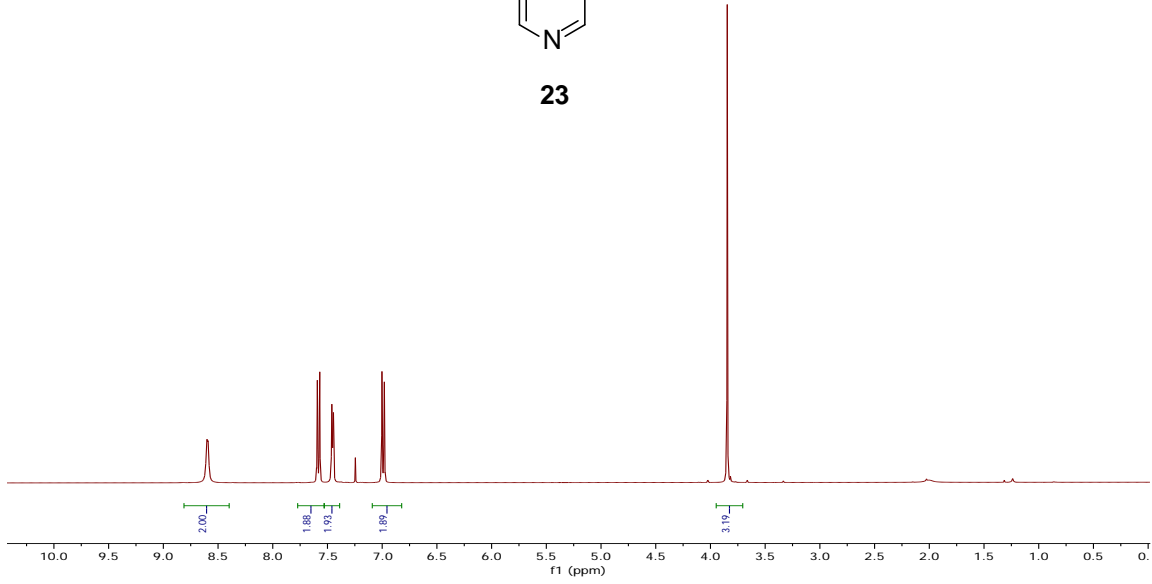

Carbon NMR

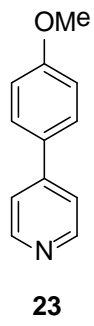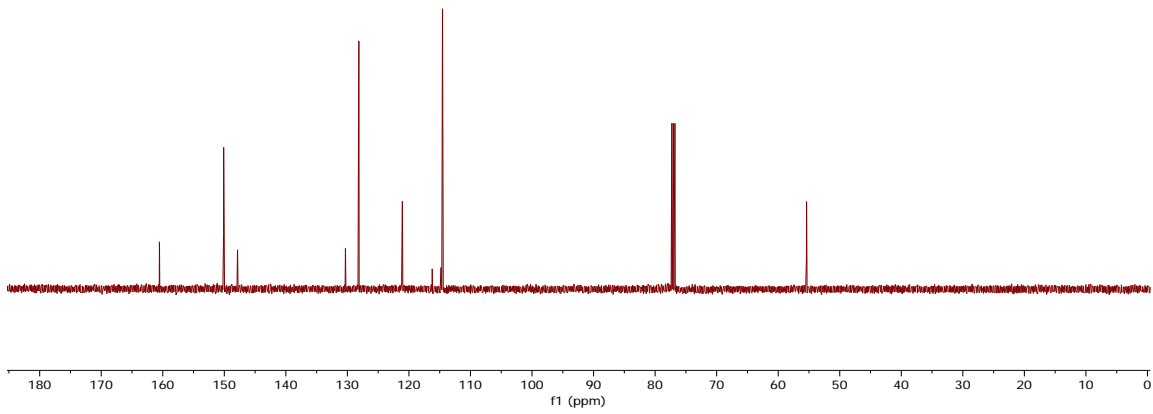

Proton NMR

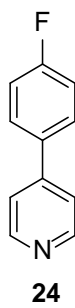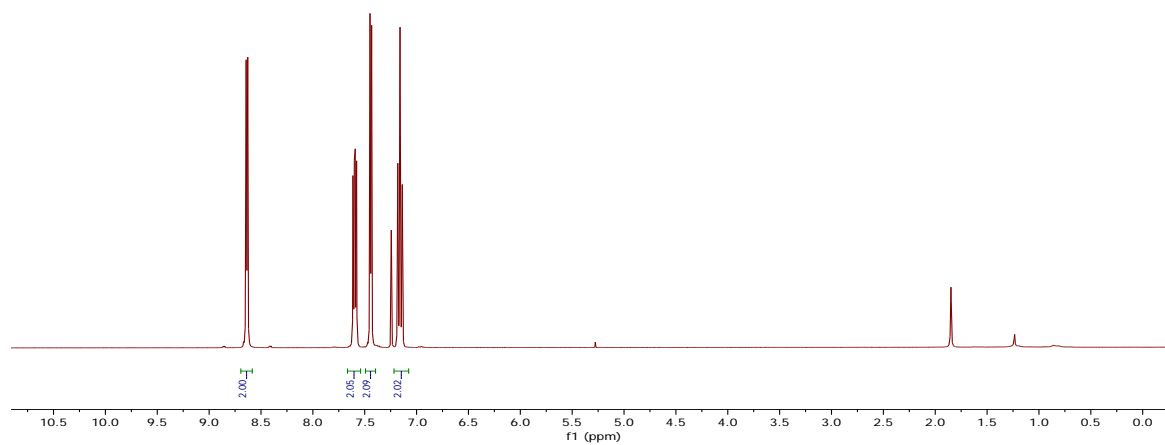

Carbon NMR

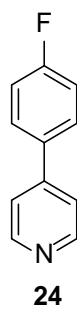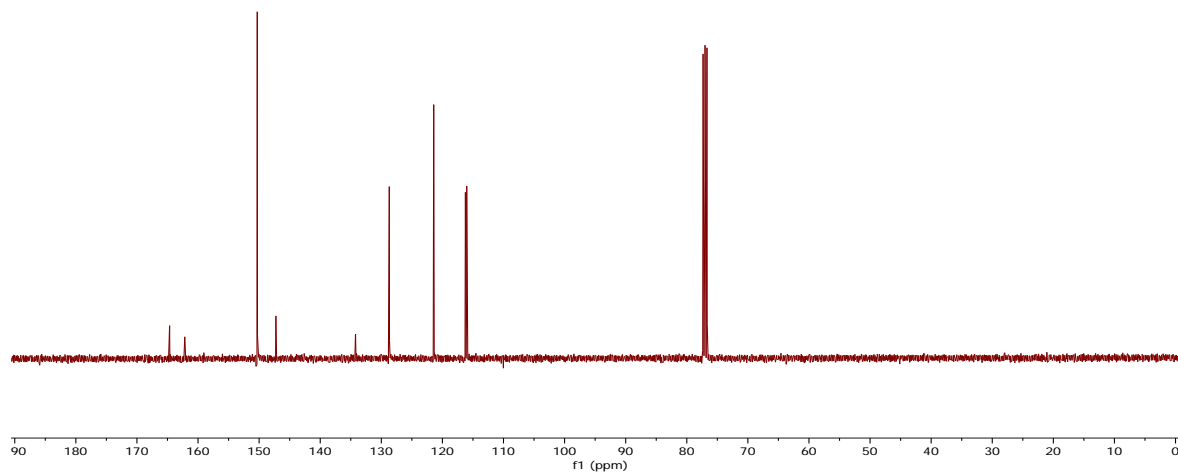

Proton NMR

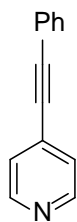

25

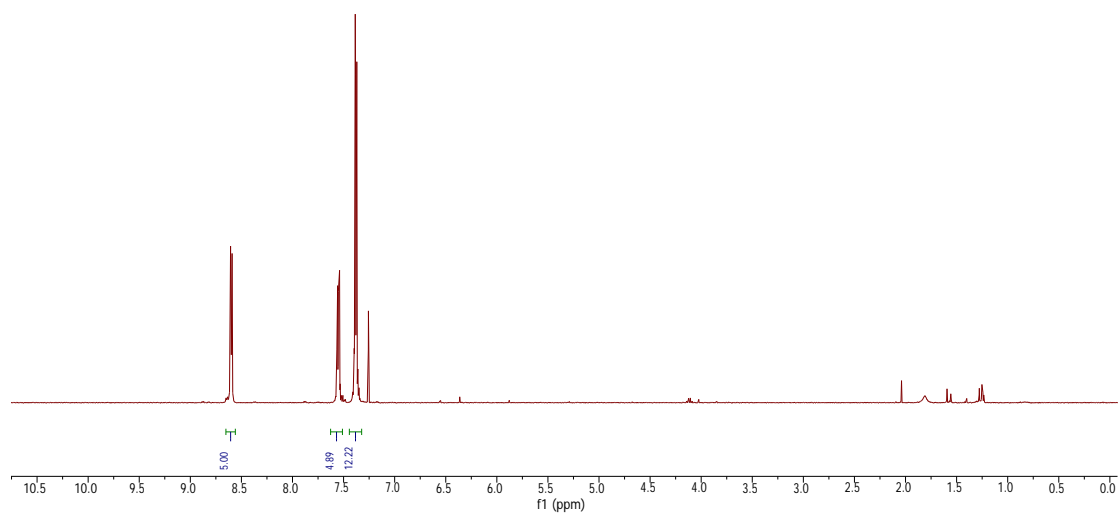

Carbon NMR

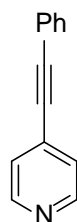

25

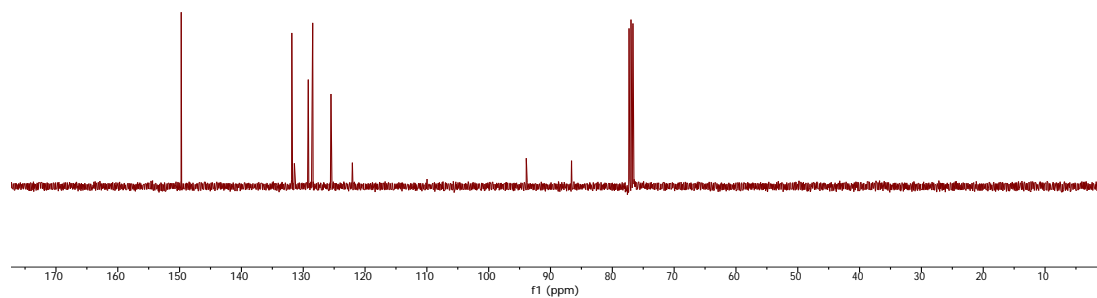

### Proton NMR

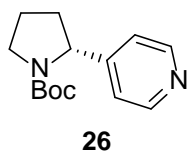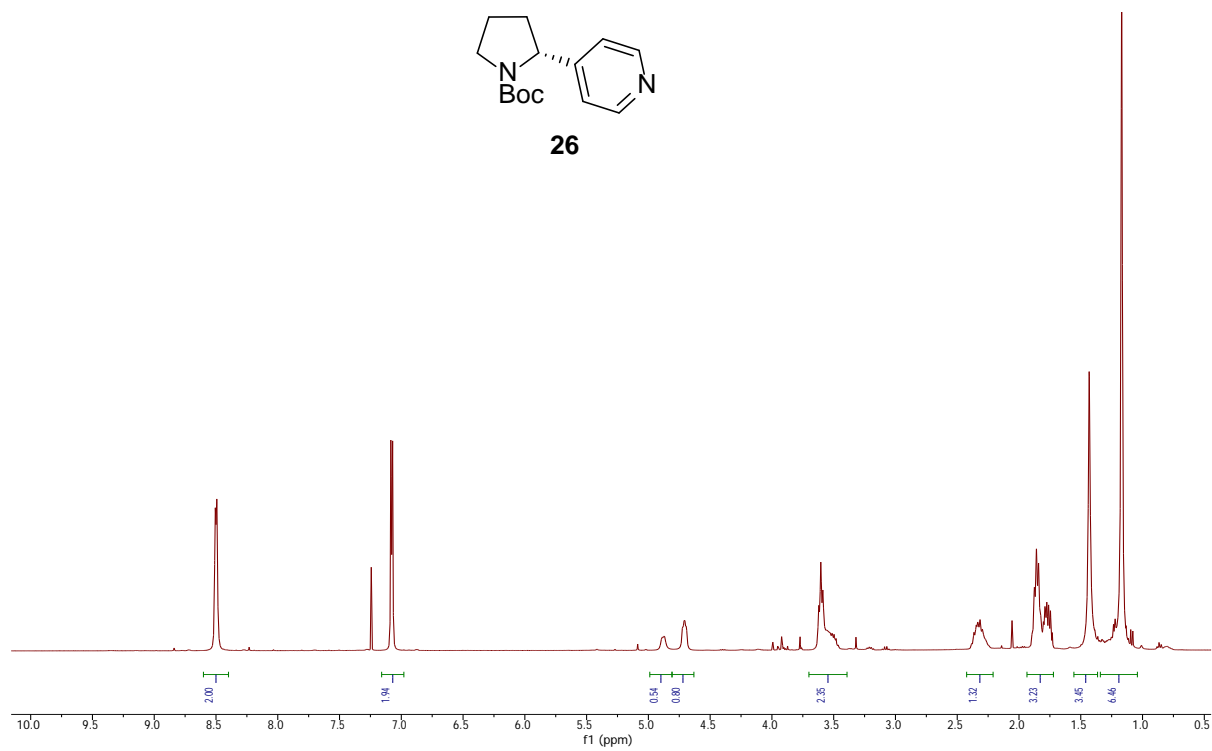

### Carbon NMR

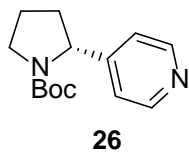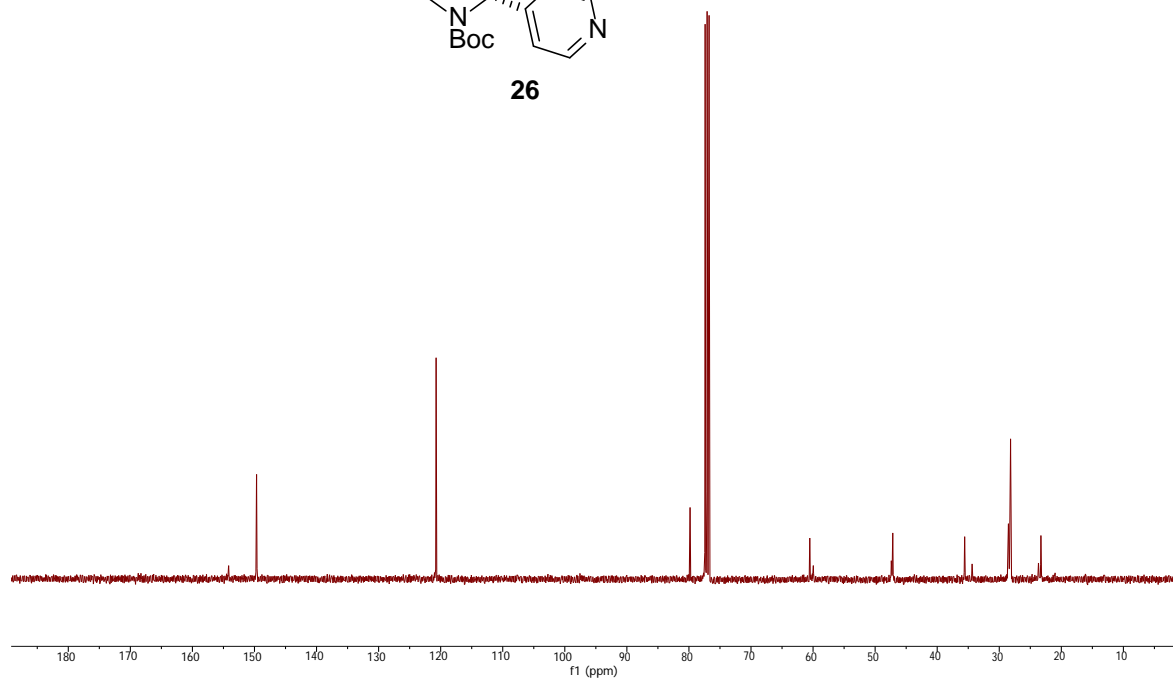

## Chiral HPLC Trace

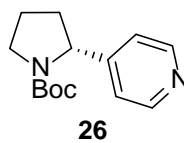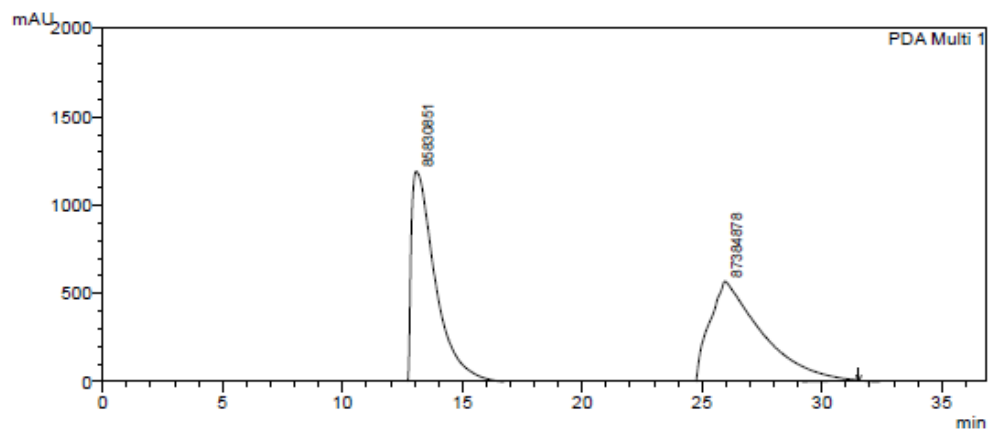

PeakTable

| Peak# | Ret. Time | Area      | Height  | Area %  |
|-------|-----------|-----------|---------|---------|
| 1     | 13.078    | 85830851  | 1203052 | 49.551  |
| 2     | 25.953    | 87384878  | 577943  | 50.449  |
| Total |           | 173215729 | 1780994 | 100.000 |

| Height % |
|----------|
| 67.549   |
| 32.451   |
| 100.000  |

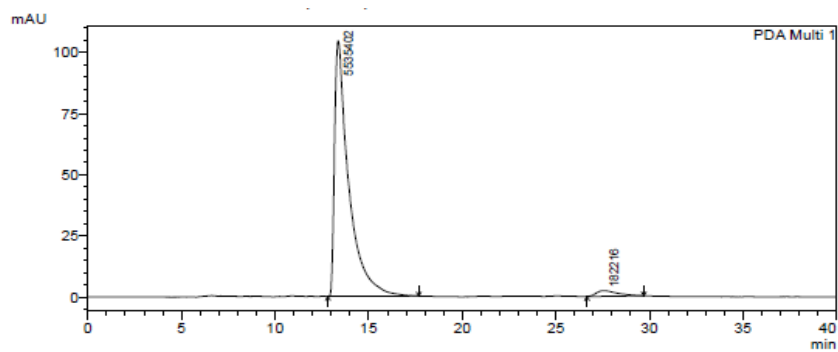

PeakTable

| Peak# | Ret. Time | Area    | Height | Area %  | Height % |
|-------|-----------|---------|--------|---------|----------|
| 1     | 13.360    | 5535402 | 104544 | 96.813  | 97.806   |
| 2     | 27.573    | 182216  | 2345   | 3.187   | 2.194    |
| Total |           | 5717619 | 106888 | 100.000 | 100.000  |

### Proton NMR

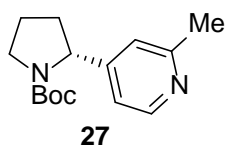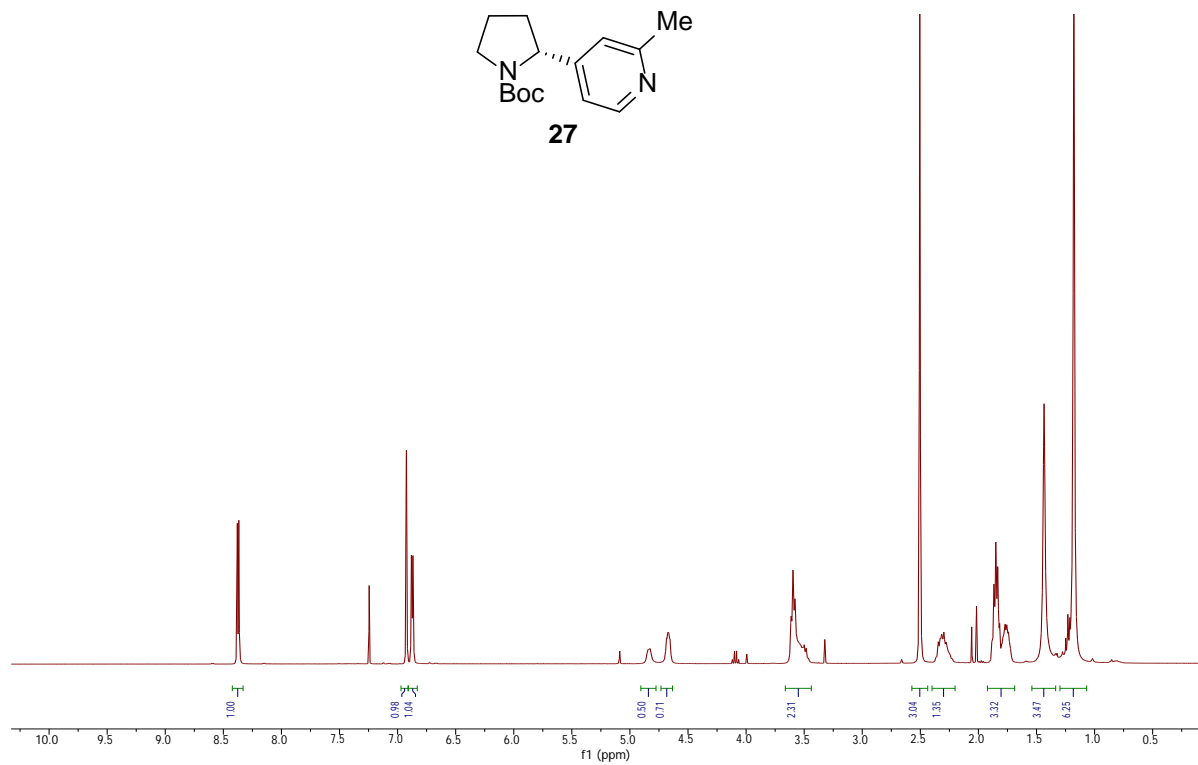

### Carbon NMR

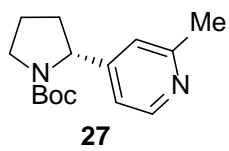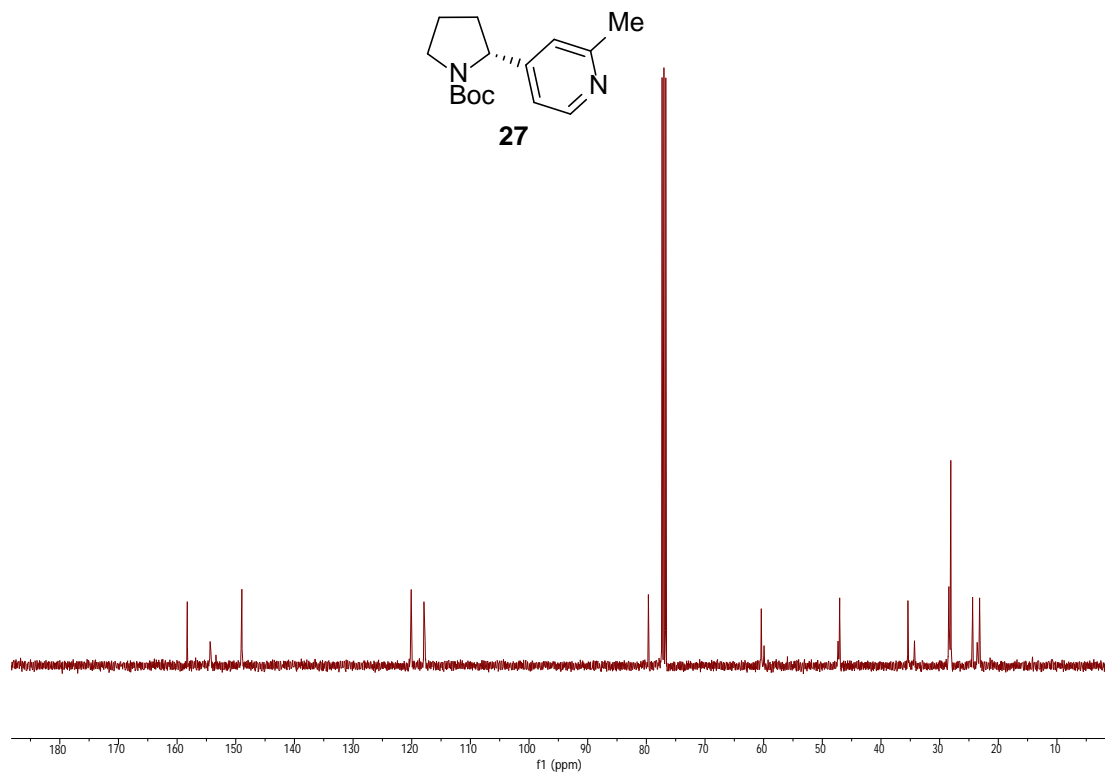

Chiral HPLC Trace

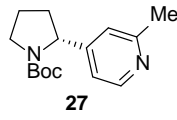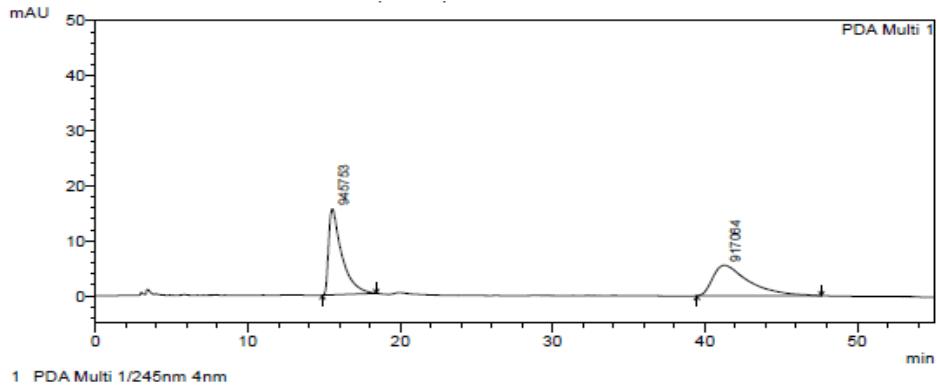

PeakTable

| Peak# | Ret. Time | Area    | Height | Area %  | Height % |
|-------|-----------|---------|--------|---------|----------|
| 1     | 15.541    | 945753  | 15636  | 50.770  | 73.791   |
| 2     | 41.262    | 917064  | 5554   | 49.230  | 26.209   |
| Total |           | 1862817 | 21190  | 100.000 | 100.000  |

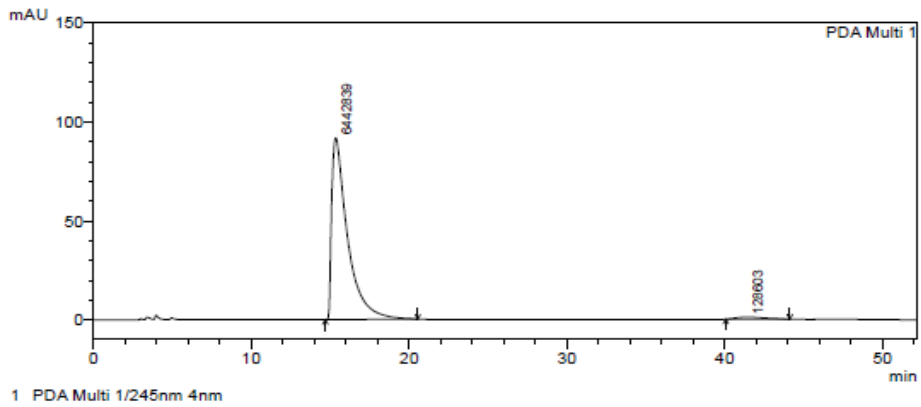

PeakTable

| Peak# | Ret. Time | Area    | Height | Area %  |
|-------|-----------|---------|--------|---------|
| 1     | 15.347    | 6442839 | 91886  | 98.043  |
| 2     | 41.394    | 128603  | 1053   | 1.957   |
| Total |           | 6571441 | 92938  | 100.000 |

| Height % |
|----------|
| 98.867   |
| 1.133    |
| 100.000  |

## Proton NMR

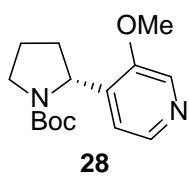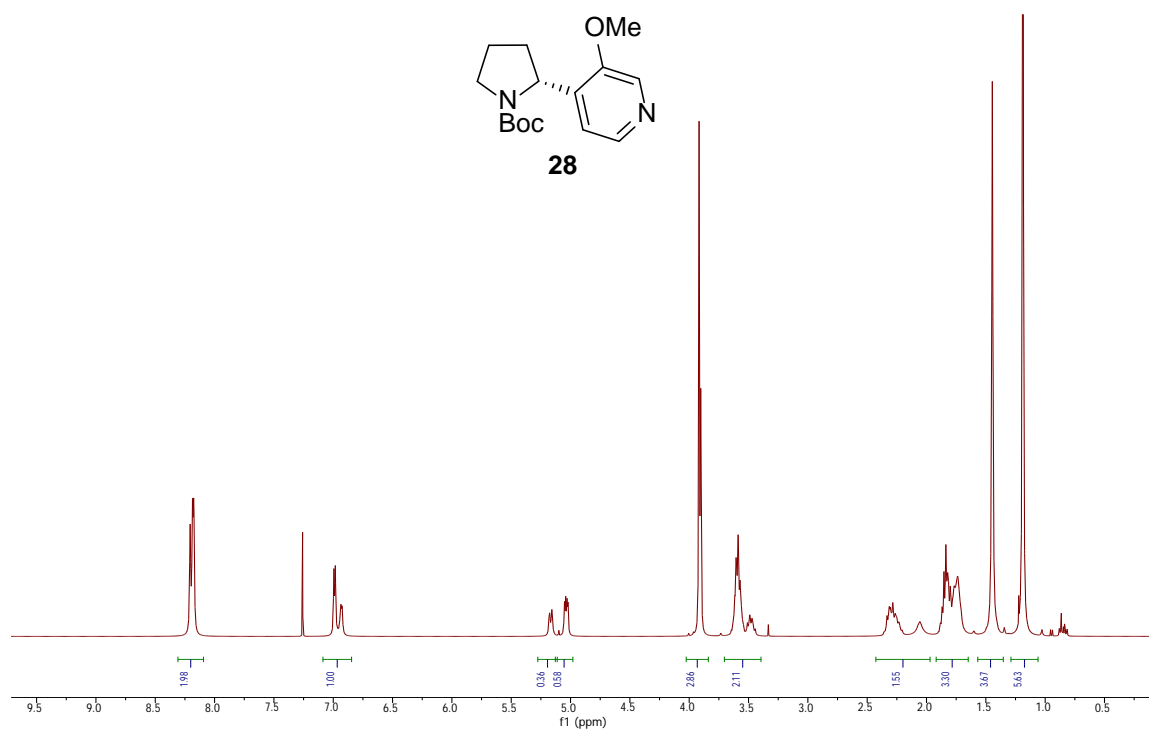

## Carbon NMR

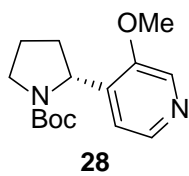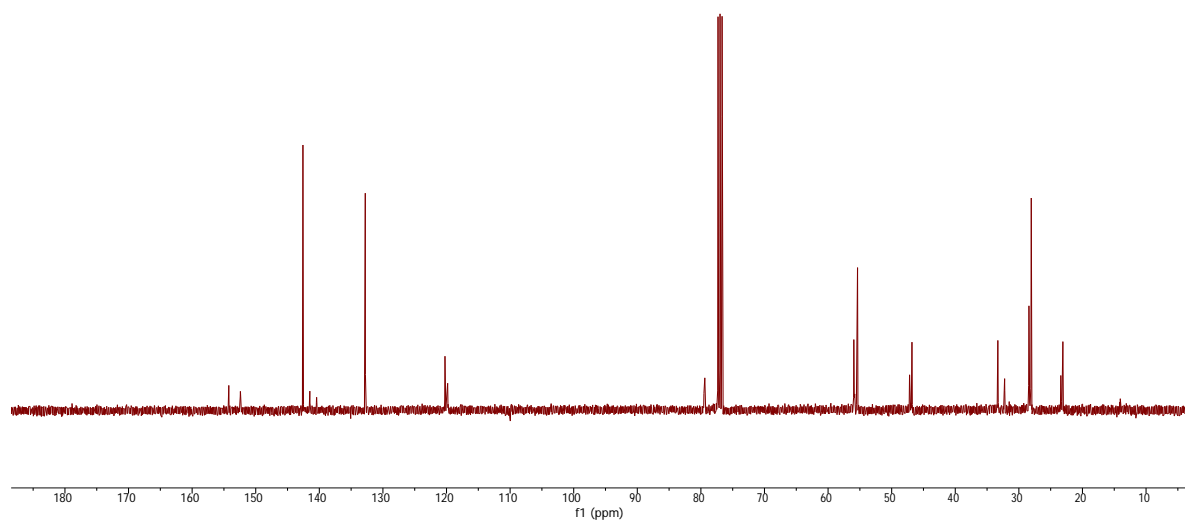



# Chiral HPLC Trace

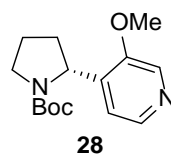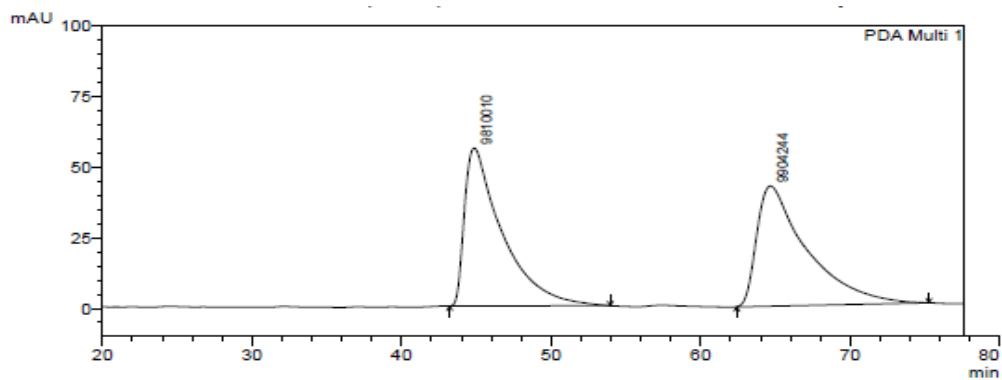

PeakTable

| Peak# | Ret. Time | Area     | Height | Area %  |
|-------|-----------|----------|--------|---------|
| 1     | 44.855    | 9810010  | 55992  | 49.761  |
| 2     | 64.657    | 9904244  | 42543  | 50.239  |
| Total |           | 19714254 | 98536  | 100.000 |

  

| Height % |
|----------|
| 56.824   |
| 43.176   |
| 100.000  |

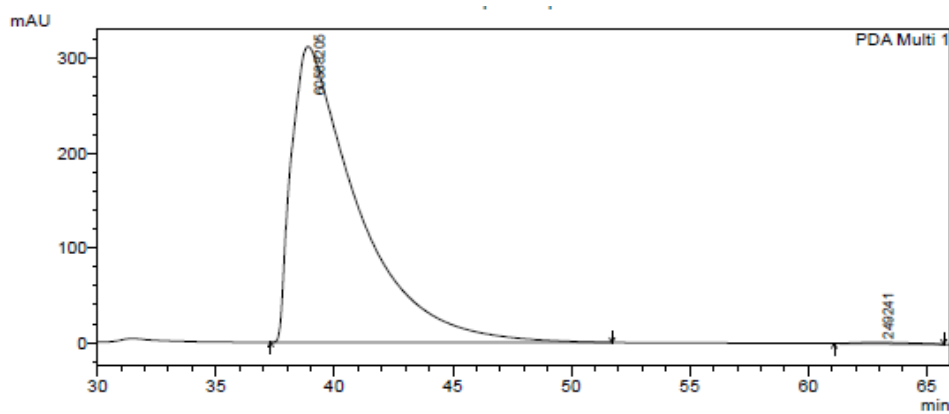

PeakTable

| Peak# | Ret. Time | Area     | Height | Area %  | Height % |
|-------|-----------|----------|--------|---------|----------|
| 1     | 38.881    | 60588205 | 312195 | 99.590  | 99.513   |
| 2     | 62.876    | 249241   | 1527   | 0.410   | 0.487    |
| Total |           | 60837447 | 313722 | 100.000 | 100.000  |

Proton NMR

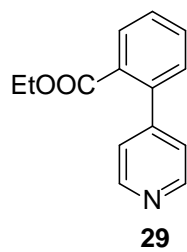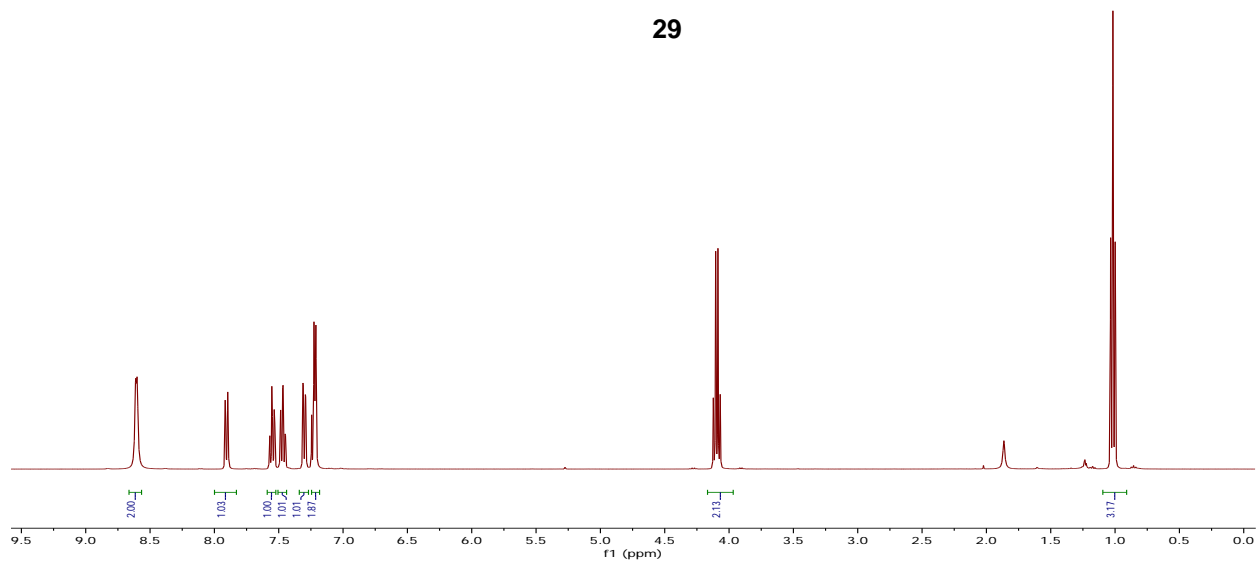

Carbon NMR

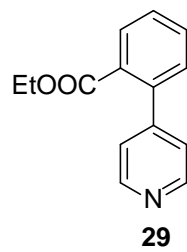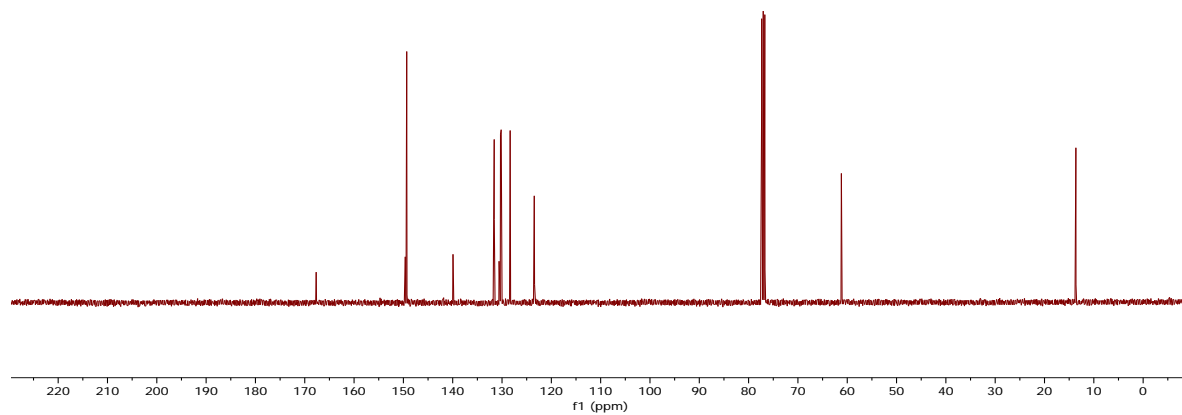

# Proton NMR

PROTON\_U1

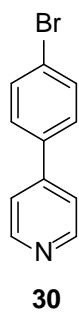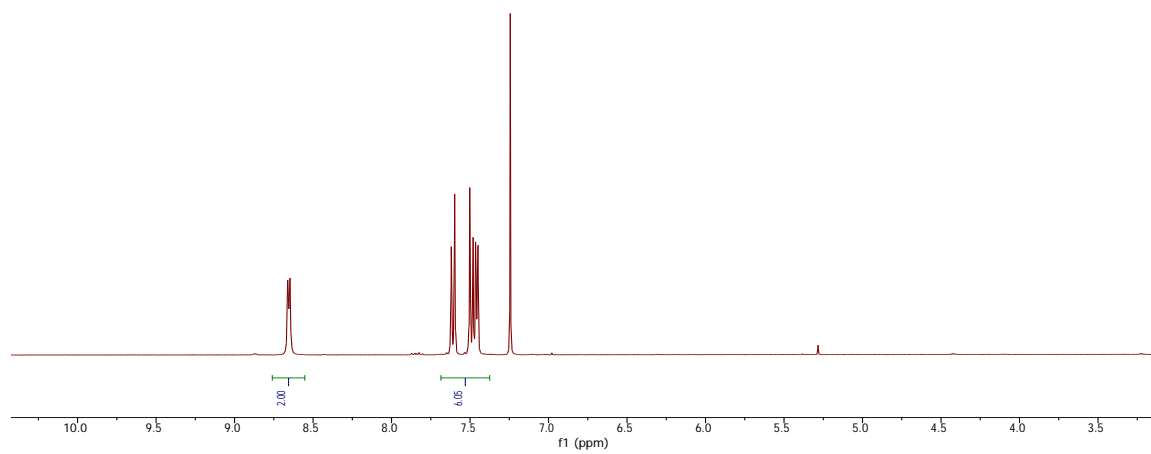

# Carbon NMR

CARBON\_U1

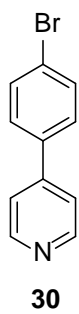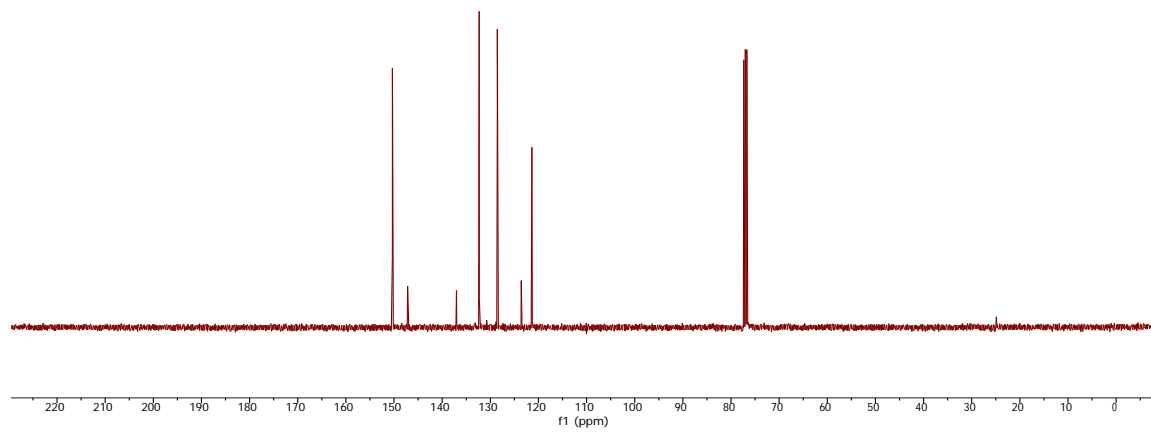

Proton NMR

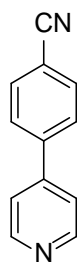

31

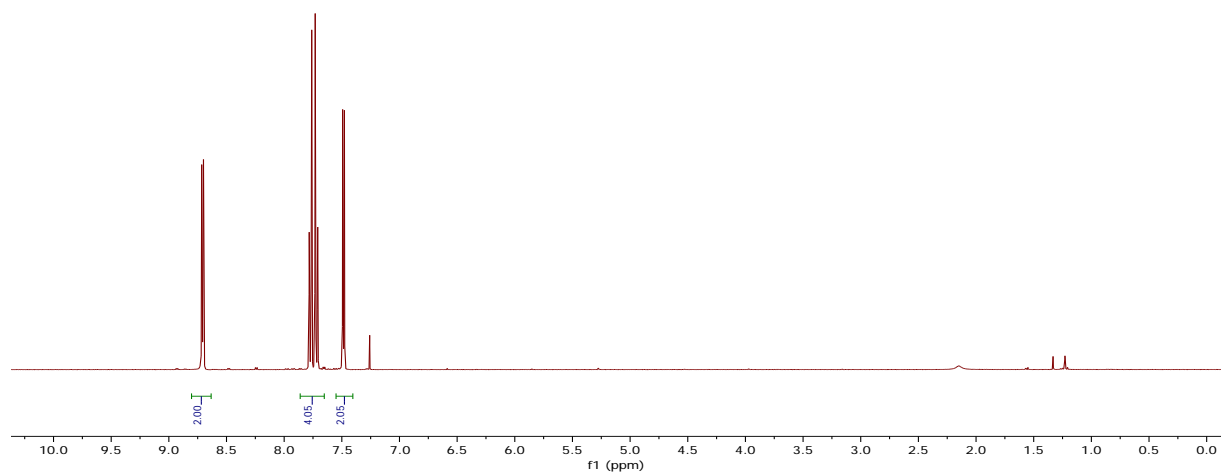

Carbon NMR

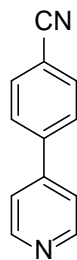

31

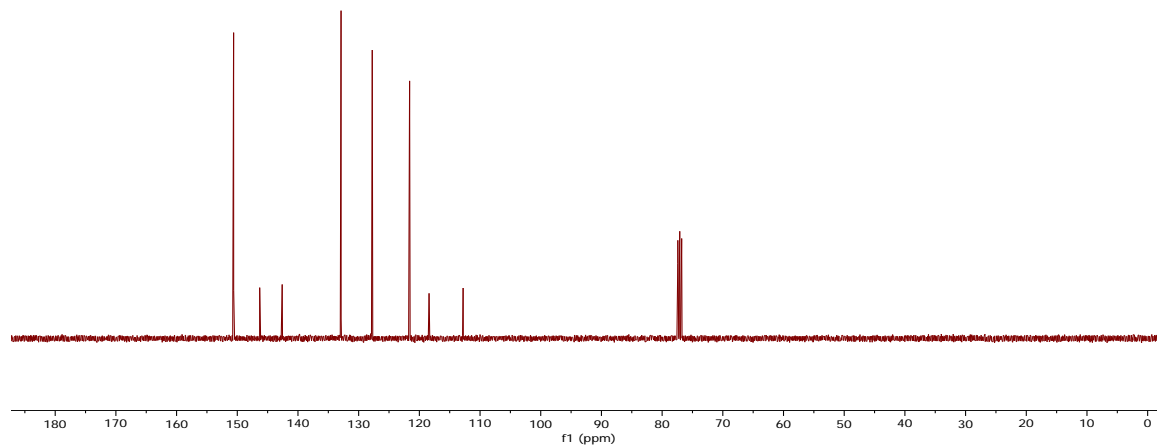

Proton NMR

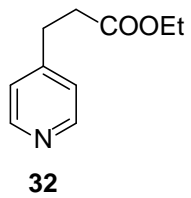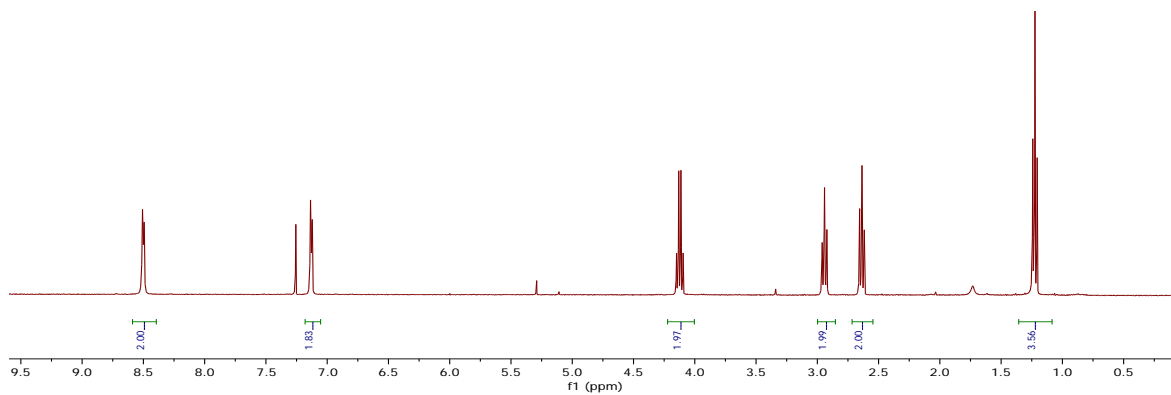

Carbon NMR

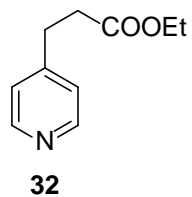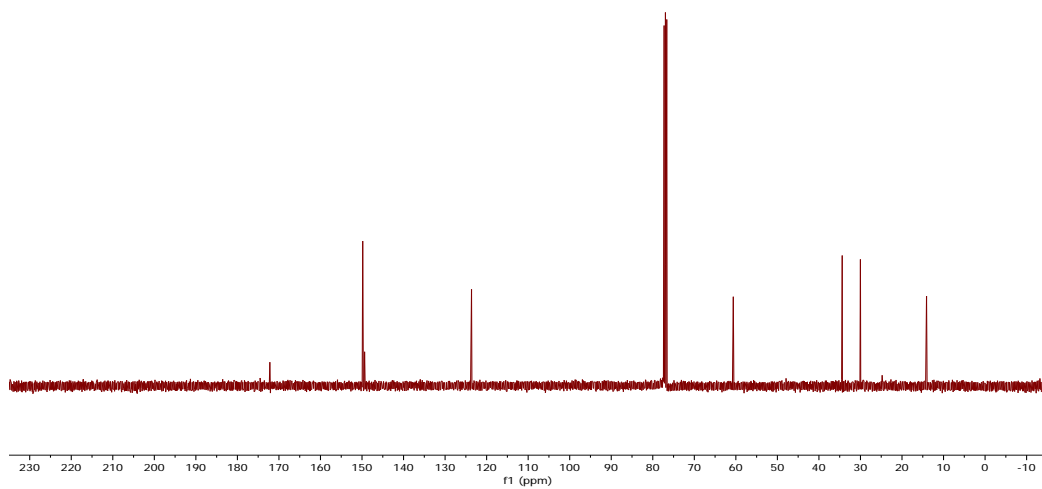

Proton NMR

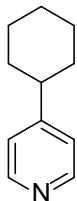

**33**

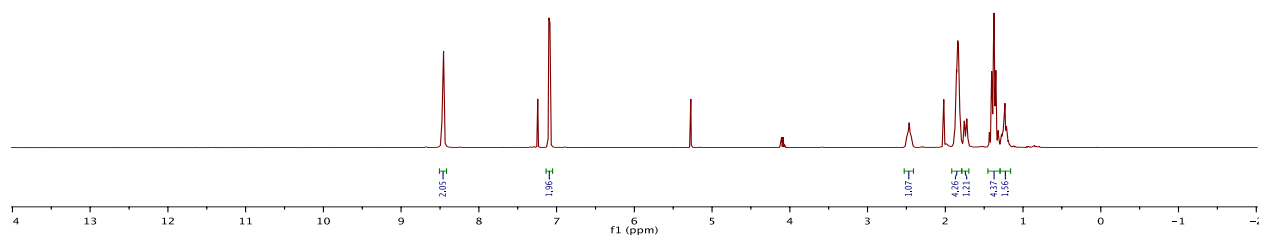

Carbon NMR

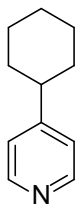

**33**

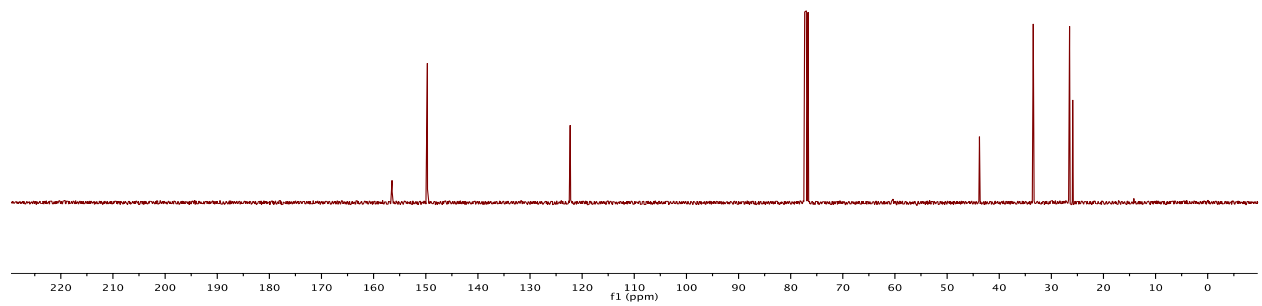

# Proton NMR

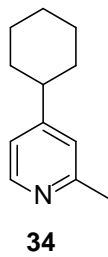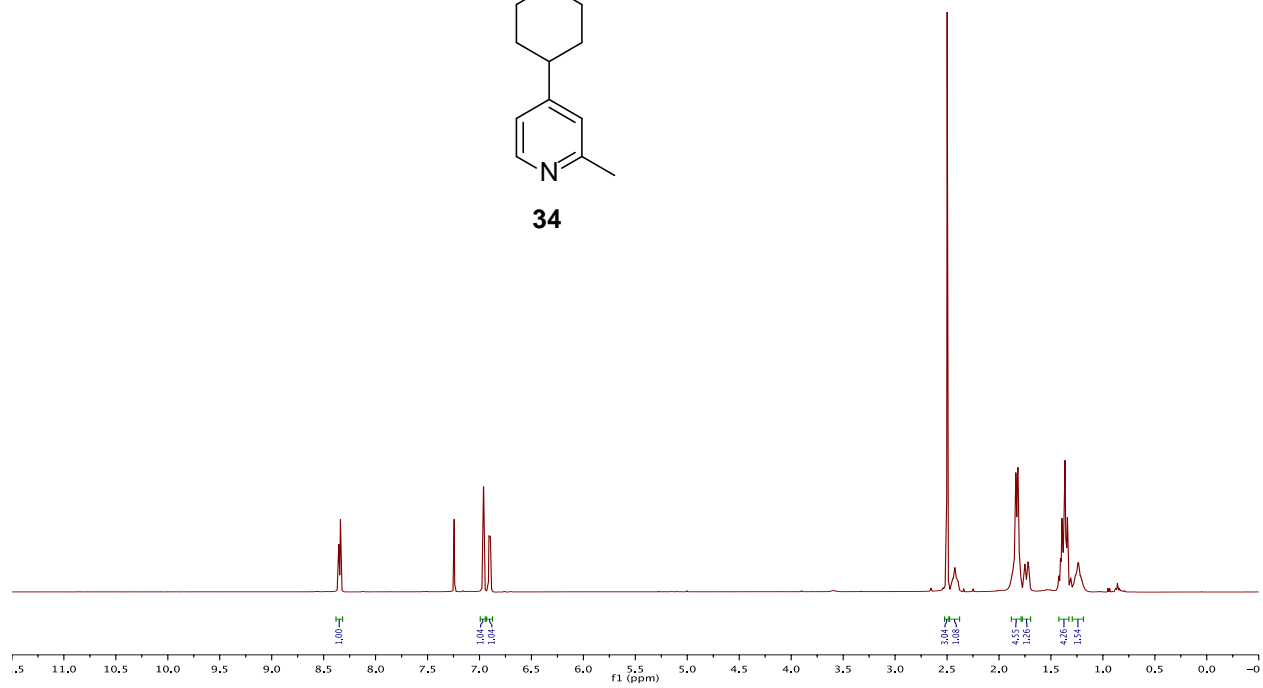

# Carbon NMR

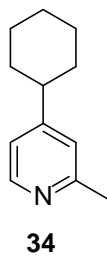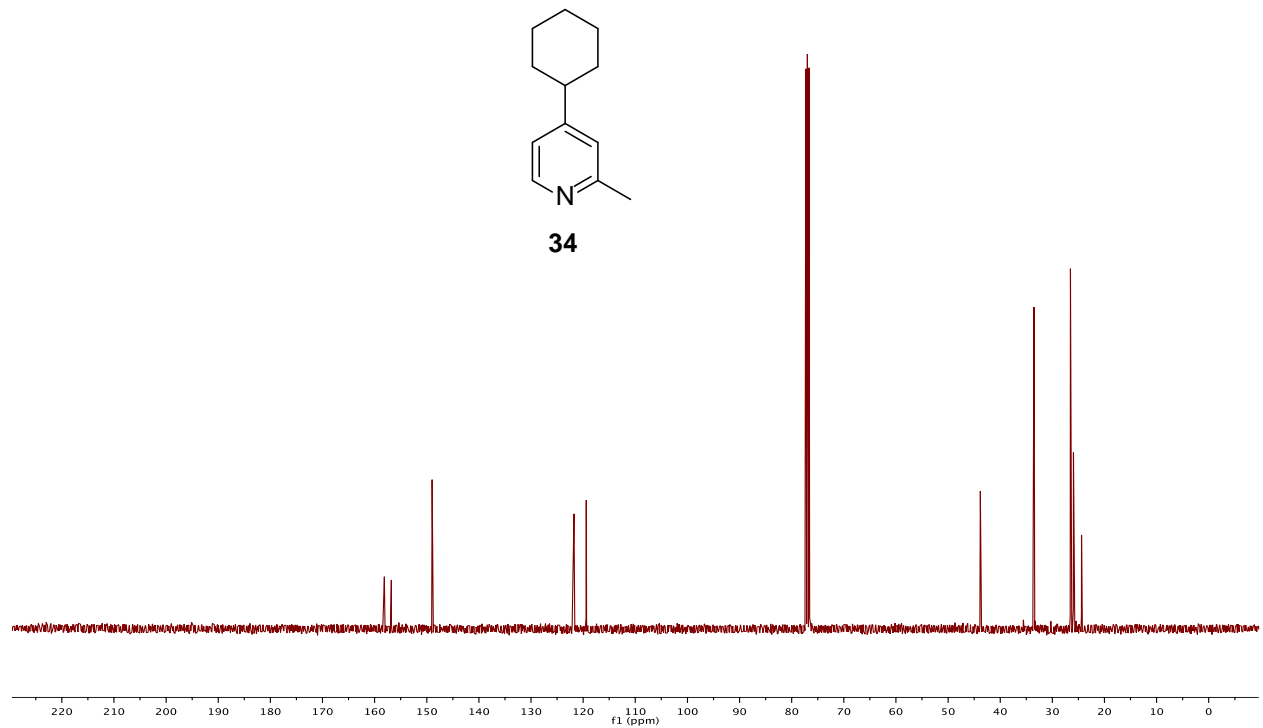

# Proton NMR

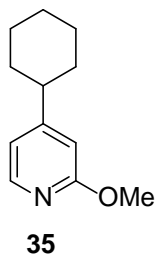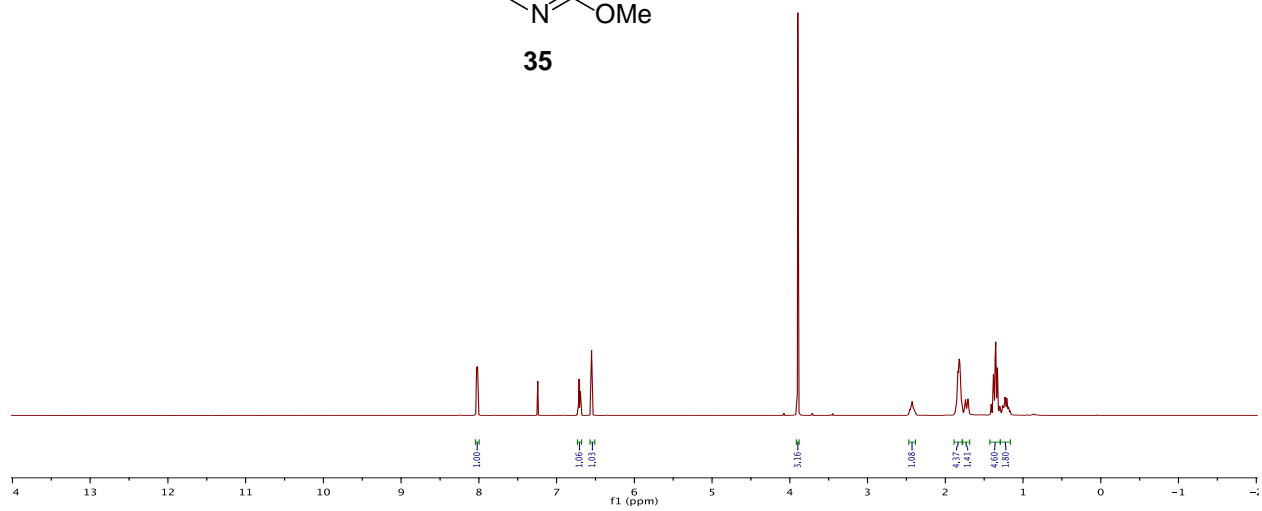

# Carbon NMR

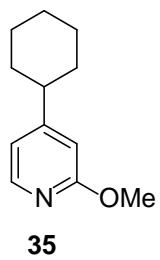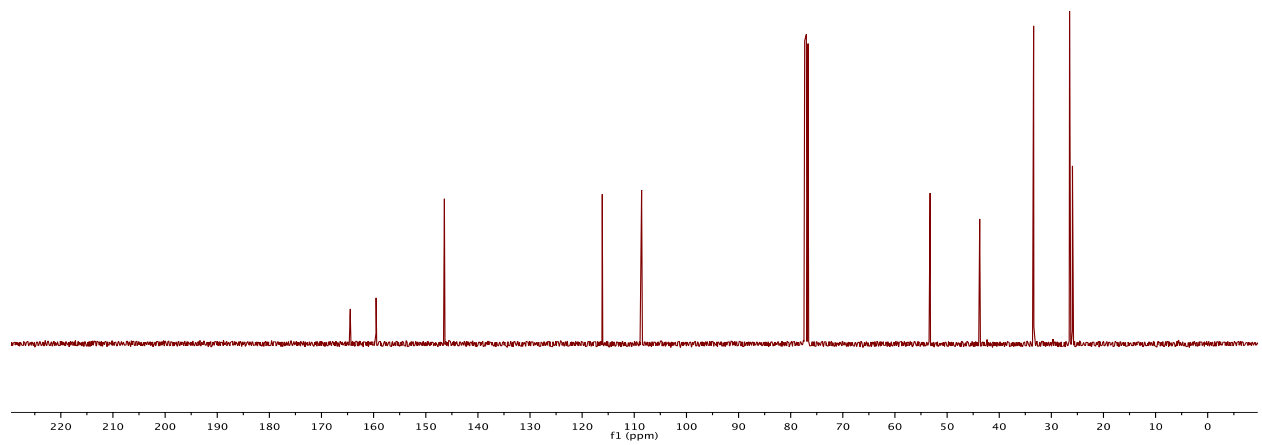



Proton NMR

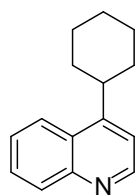

**36**

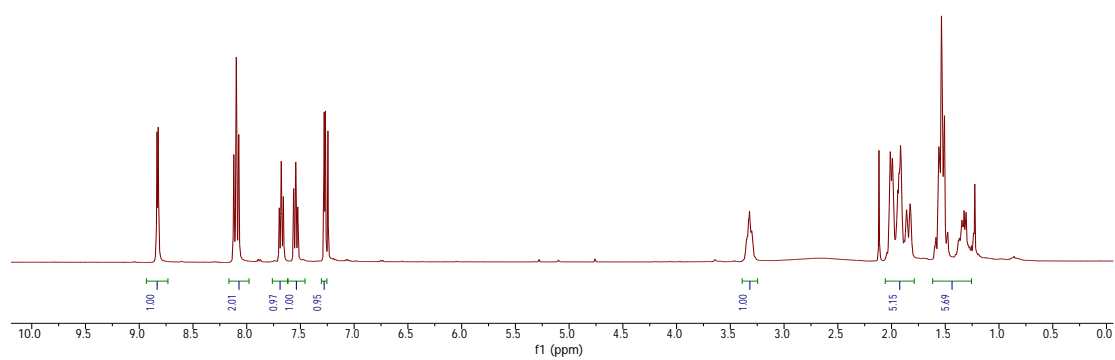

Carbon NMR

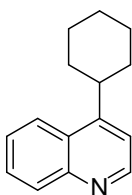

**36**

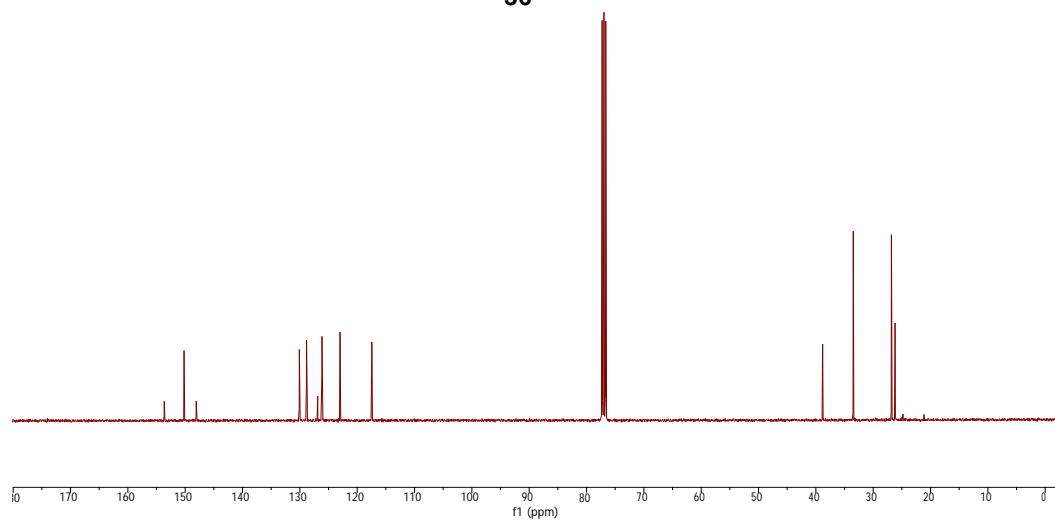

Proton NMR

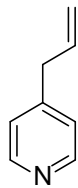

37

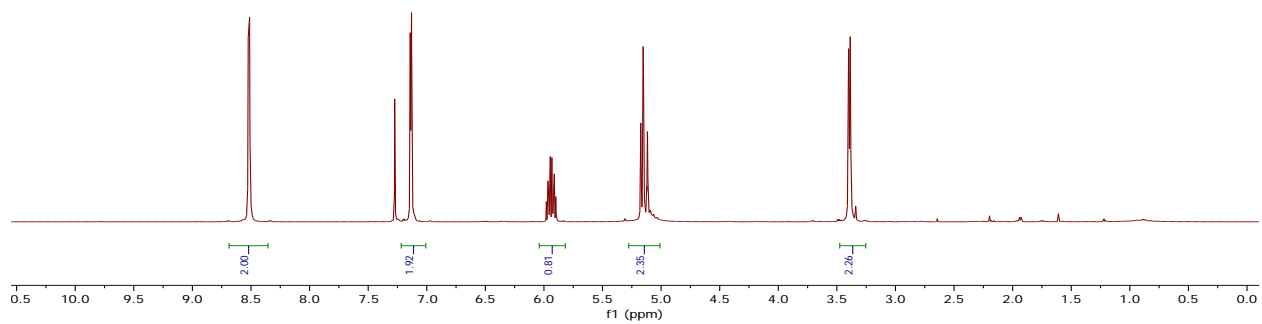

Carbon NMR

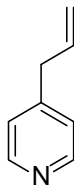

37

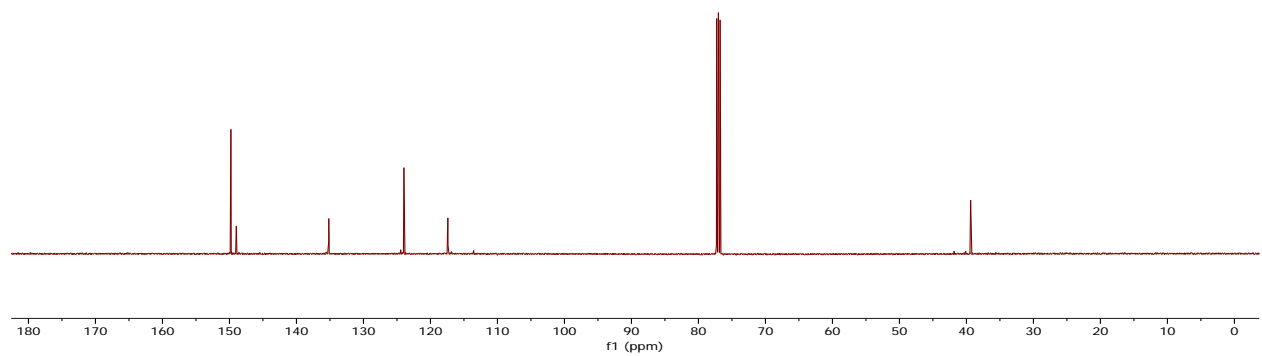

Proton NMR

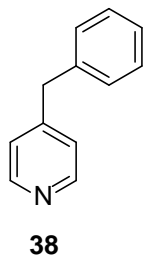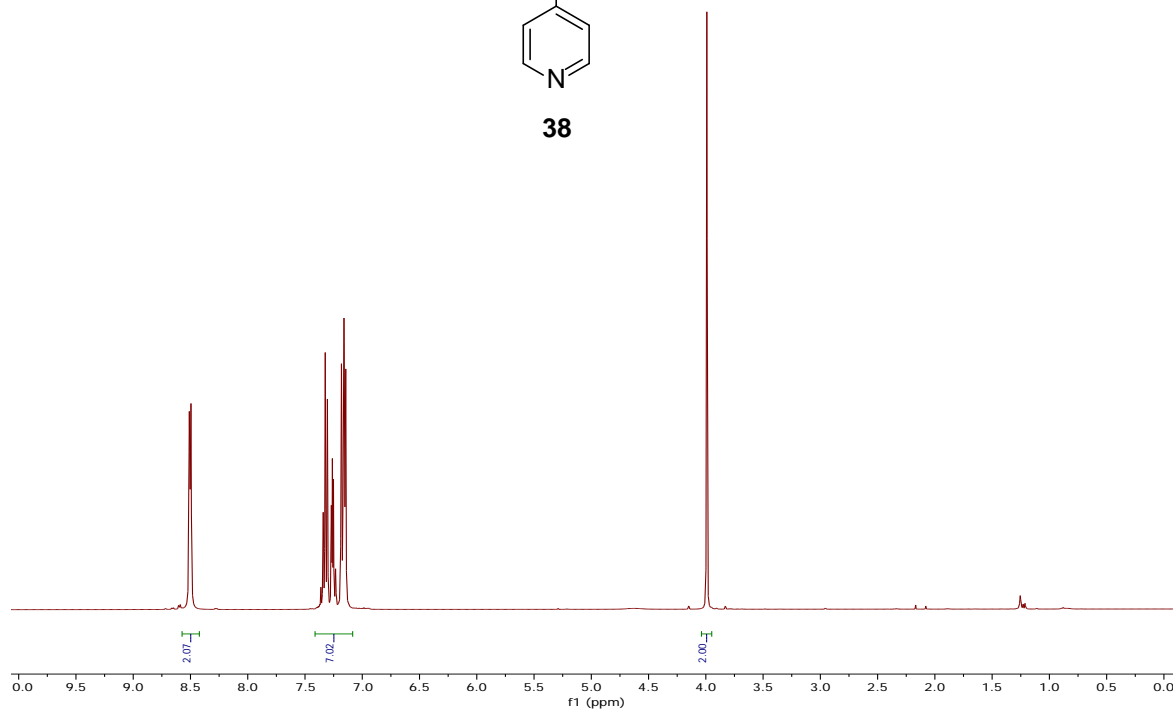

Carbon NMR

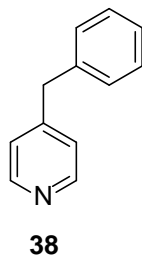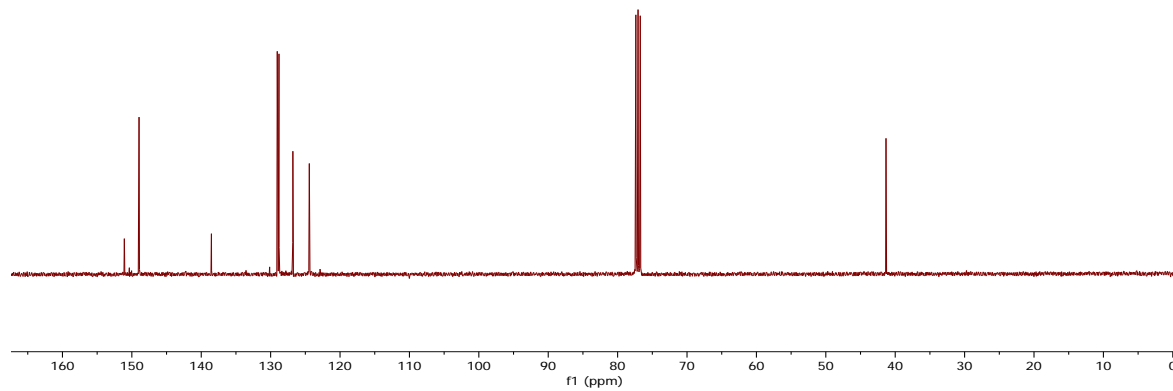

Proton NMR

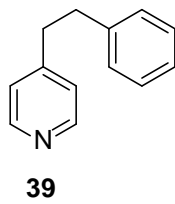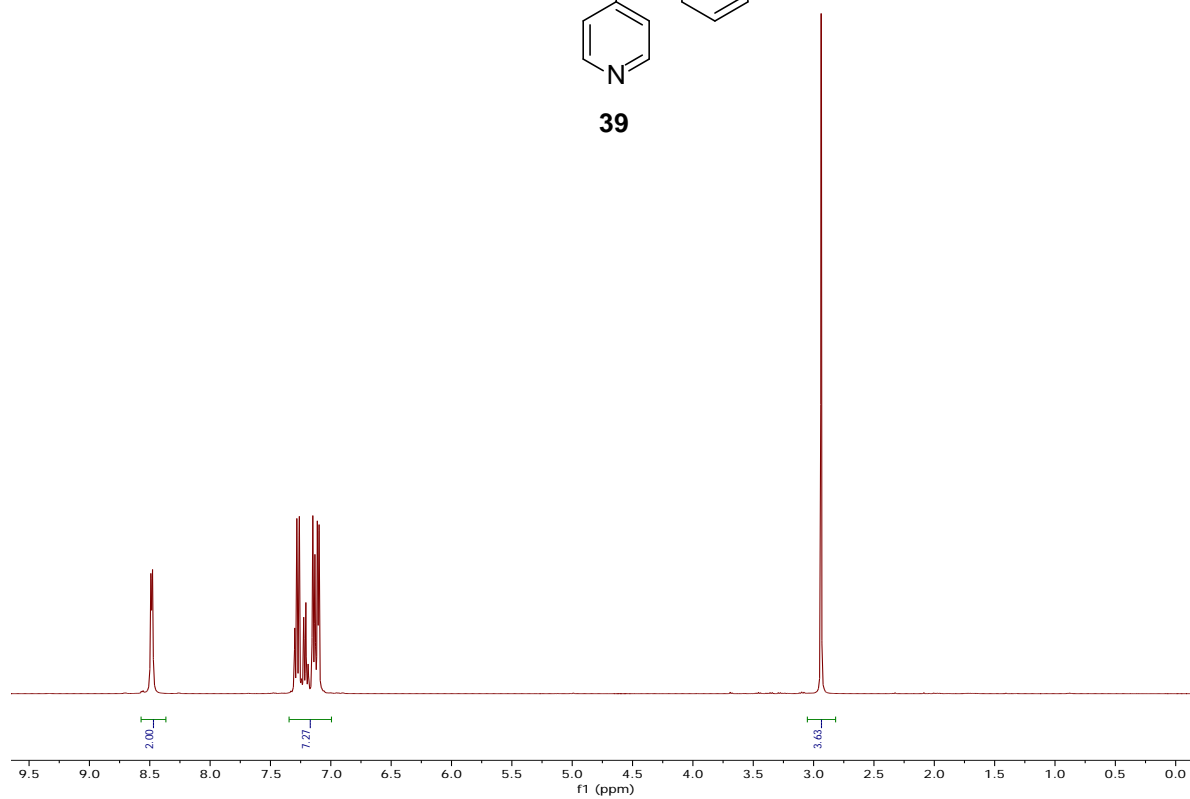

Carbon NMR

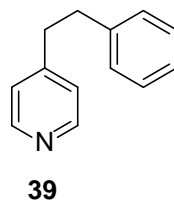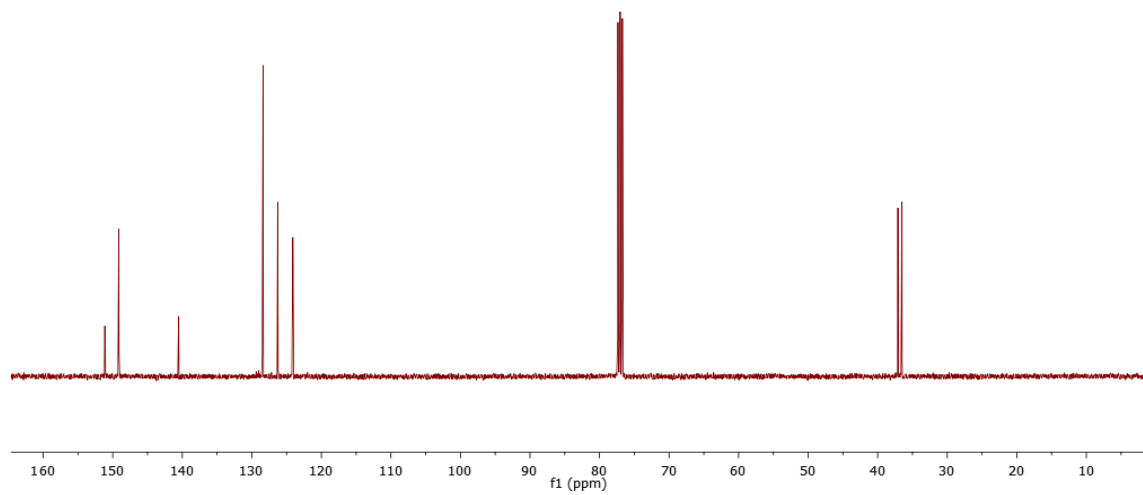

Proton NMR

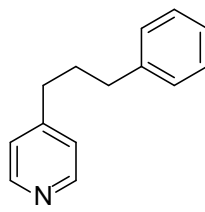

40

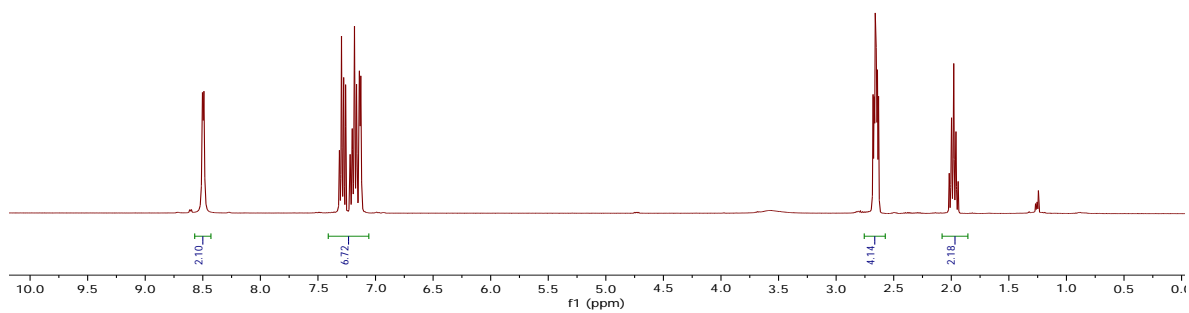

Carbon NMR

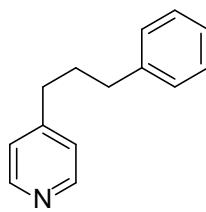

40

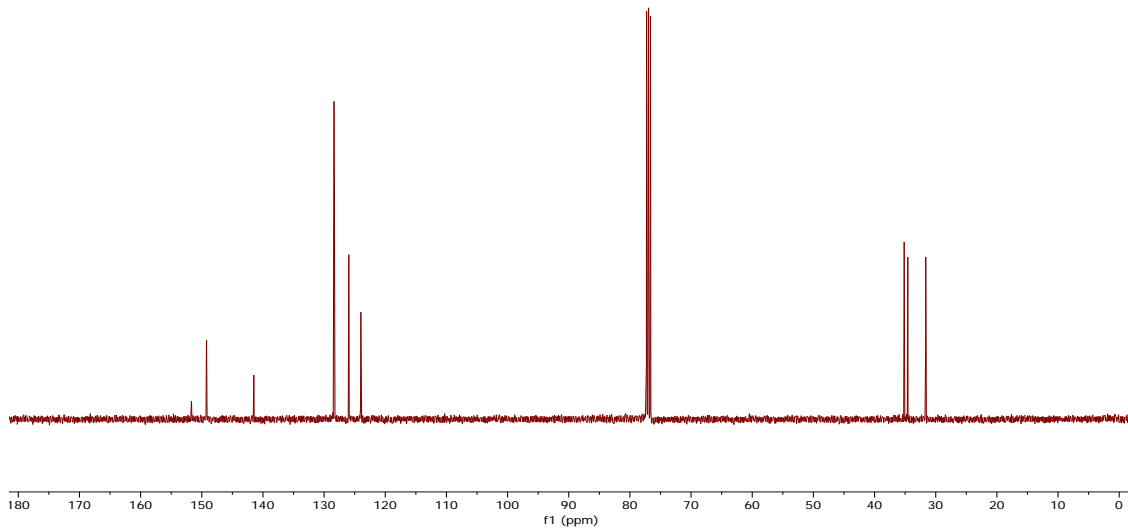

Proton NMR

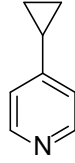

41

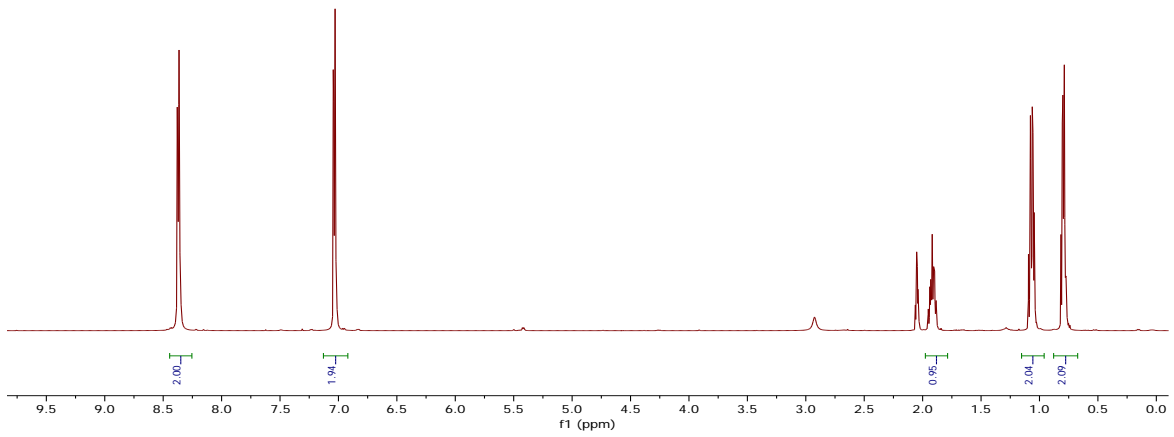

Carbon NMR

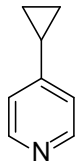

41

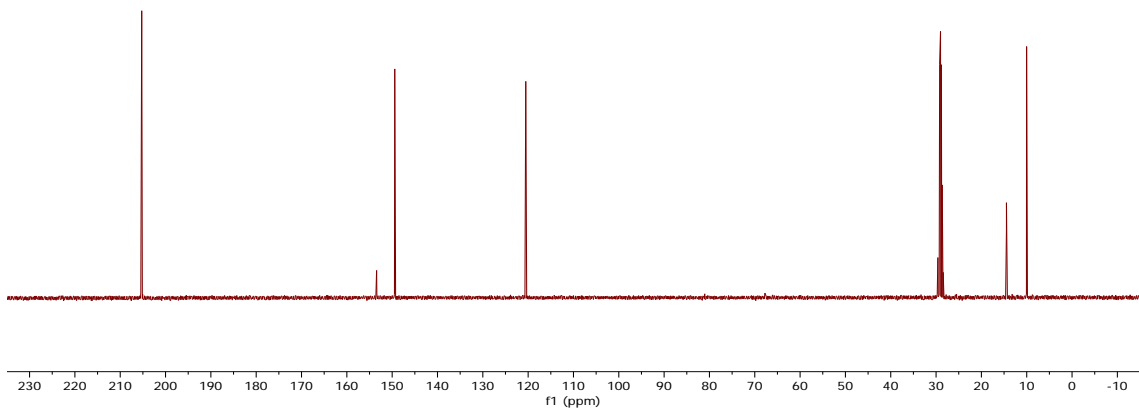

S80

Proton NMR

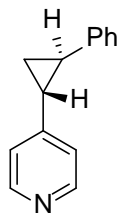

42

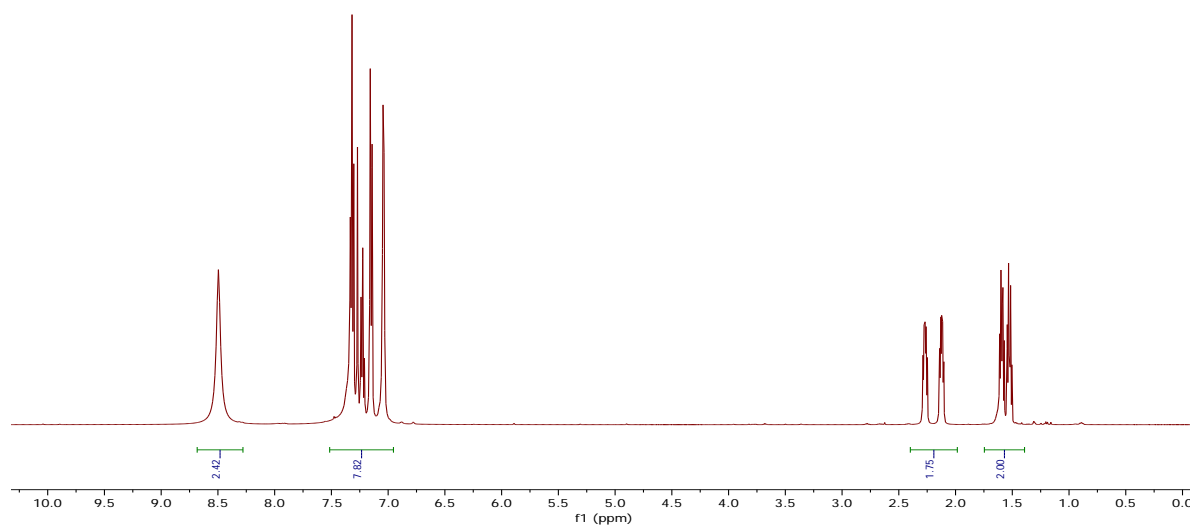

Carbon NMR

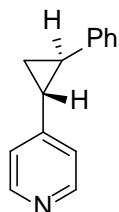

42

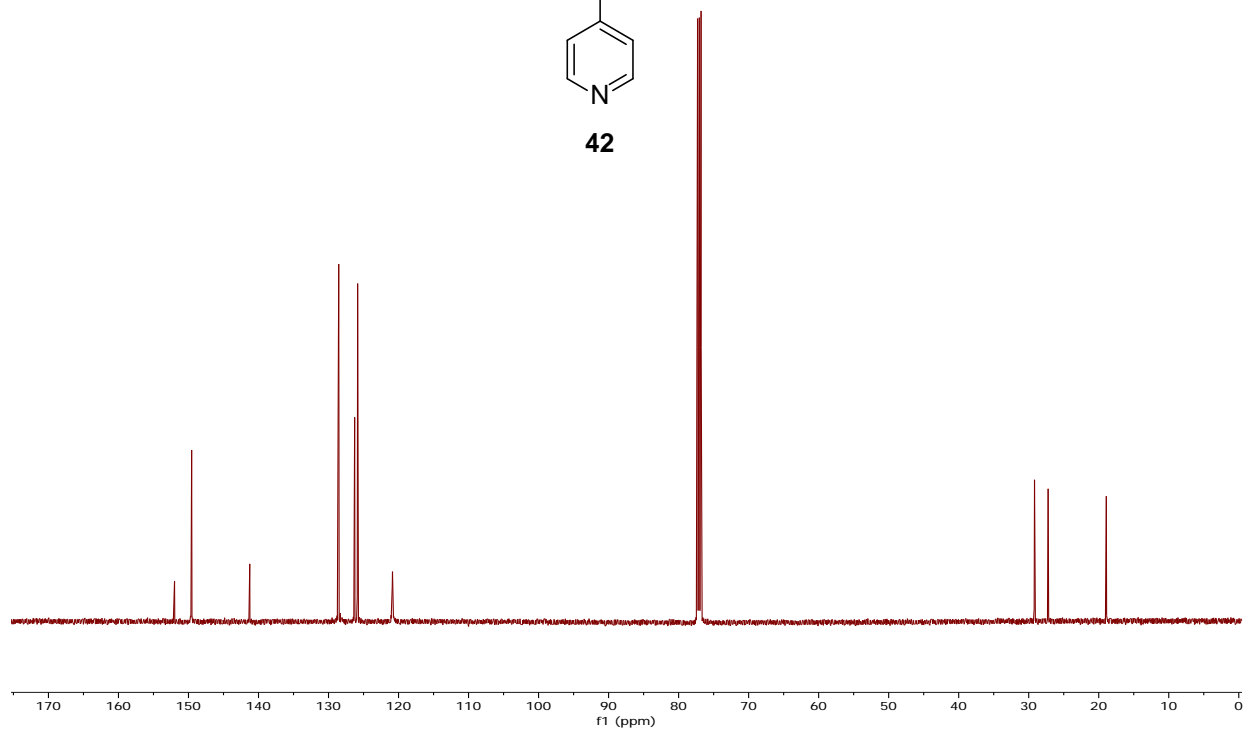

### Proton NMR

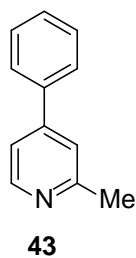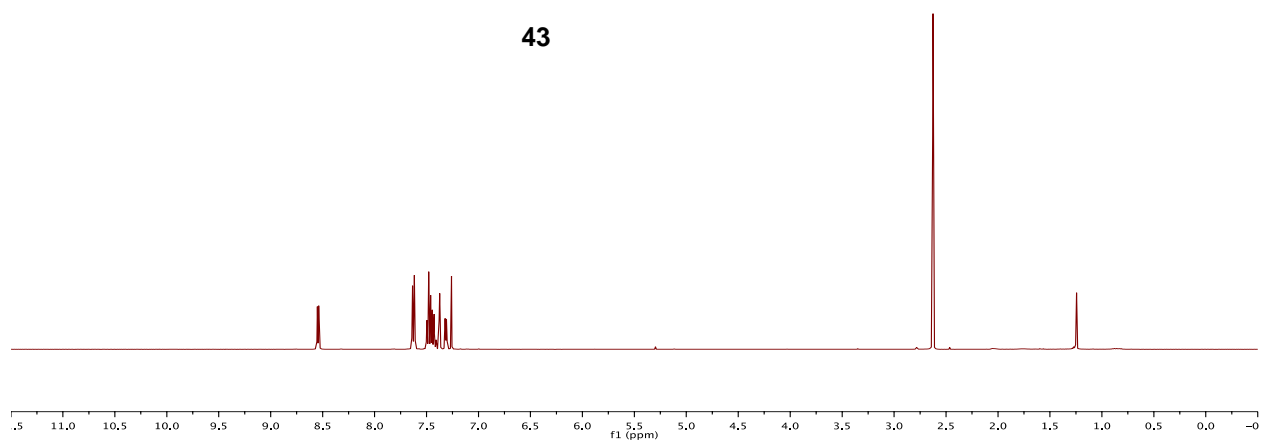

### Carbon NMR

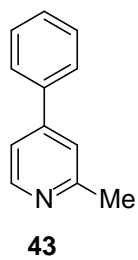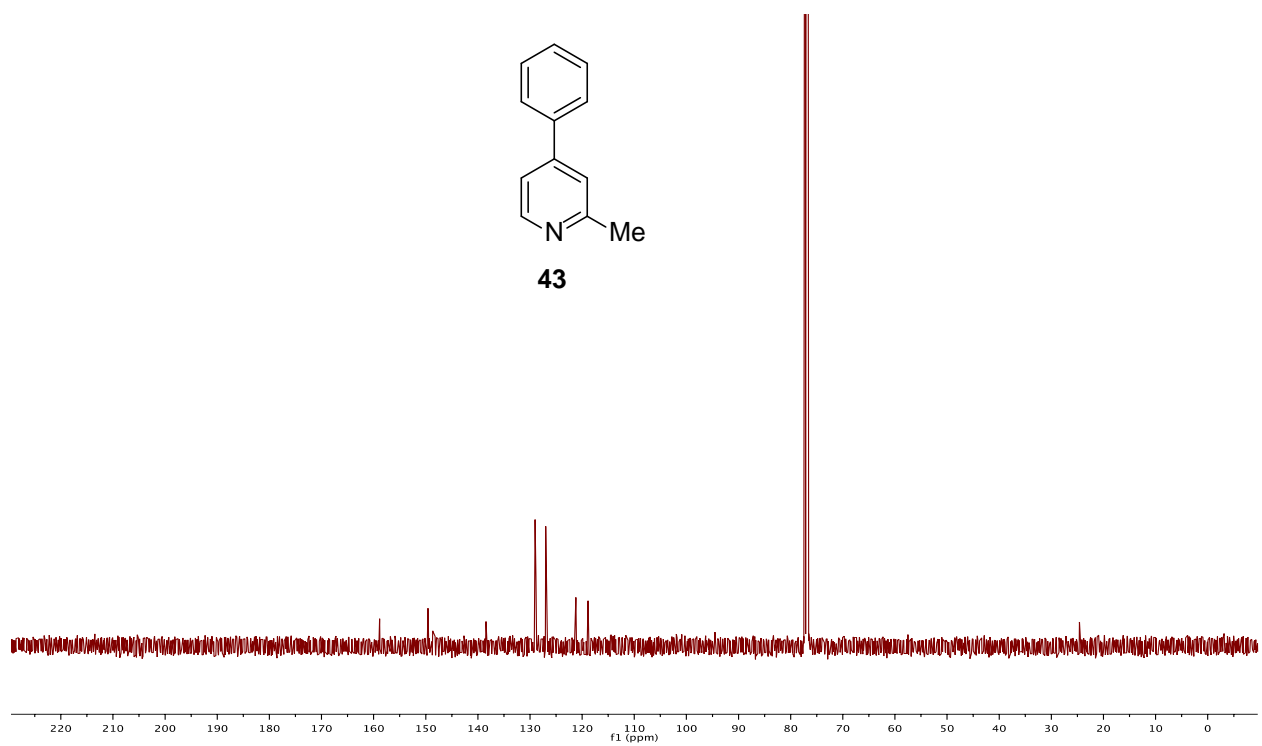



Proton NMR

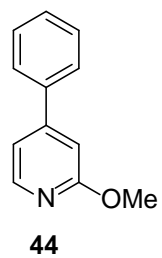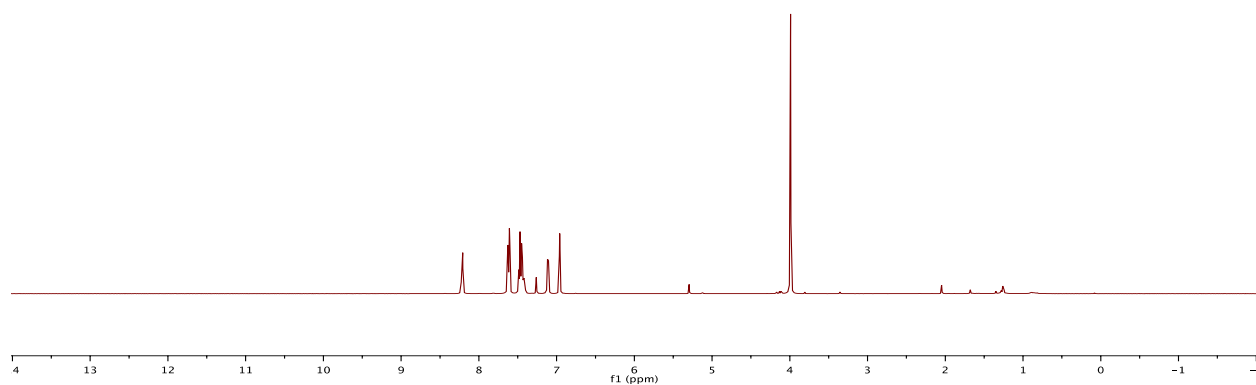

Carbon NMR

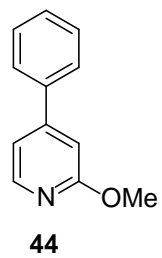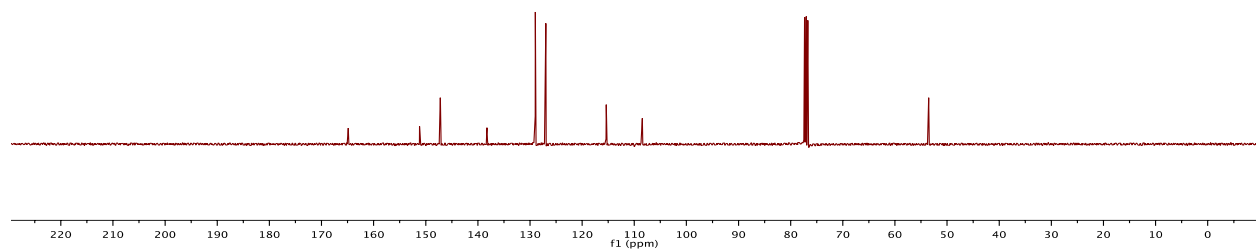

Proton NMR

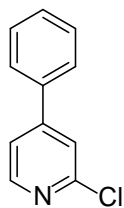

45

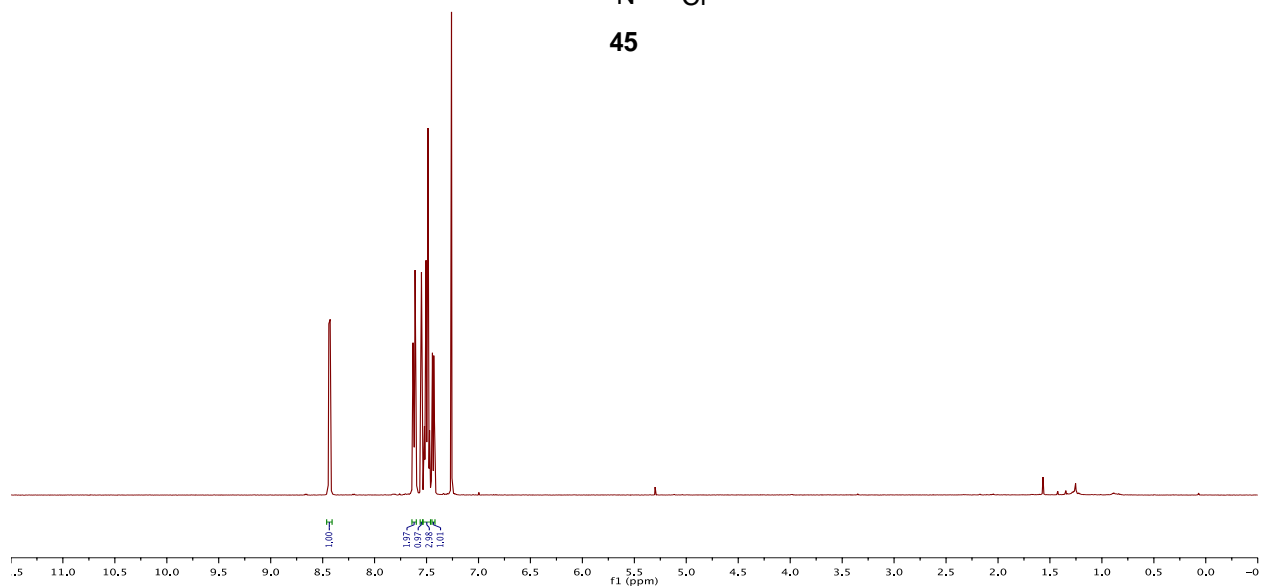

Carbon NMR

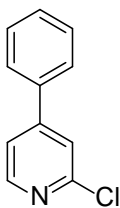

45

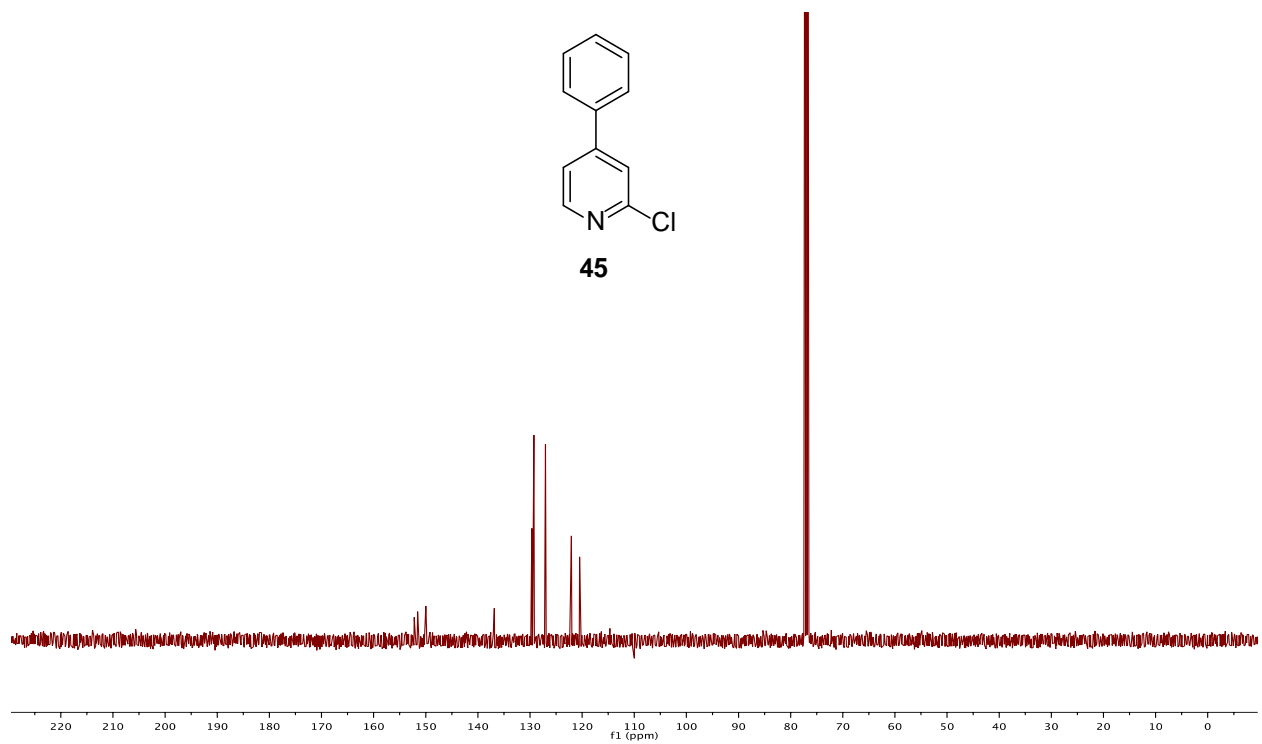

## Proton NMR

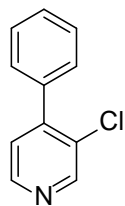

**46**

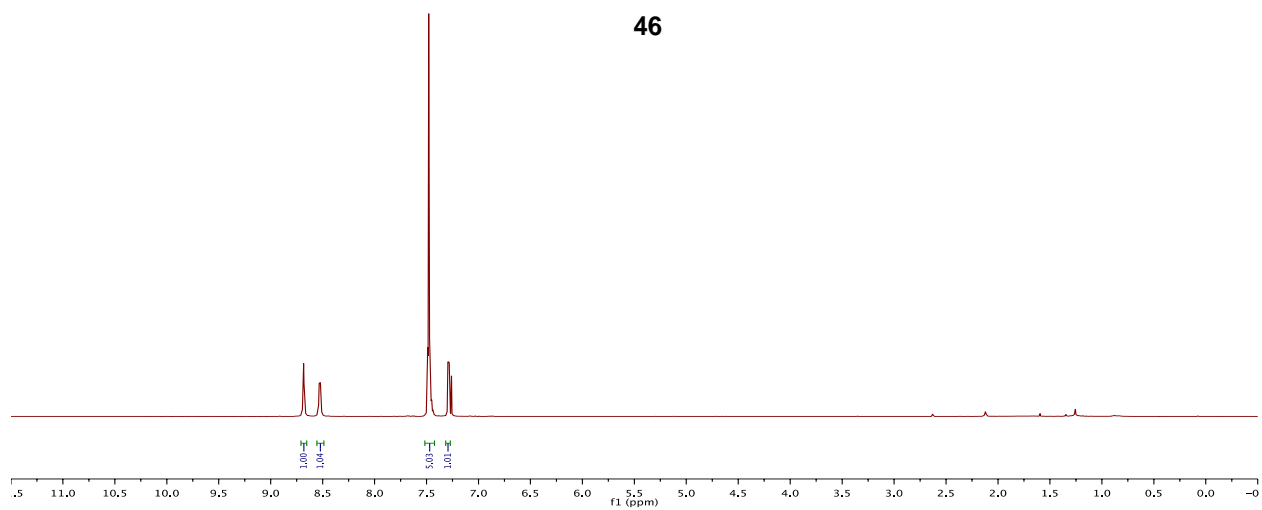

## Carbon NMR

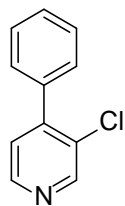

**46**

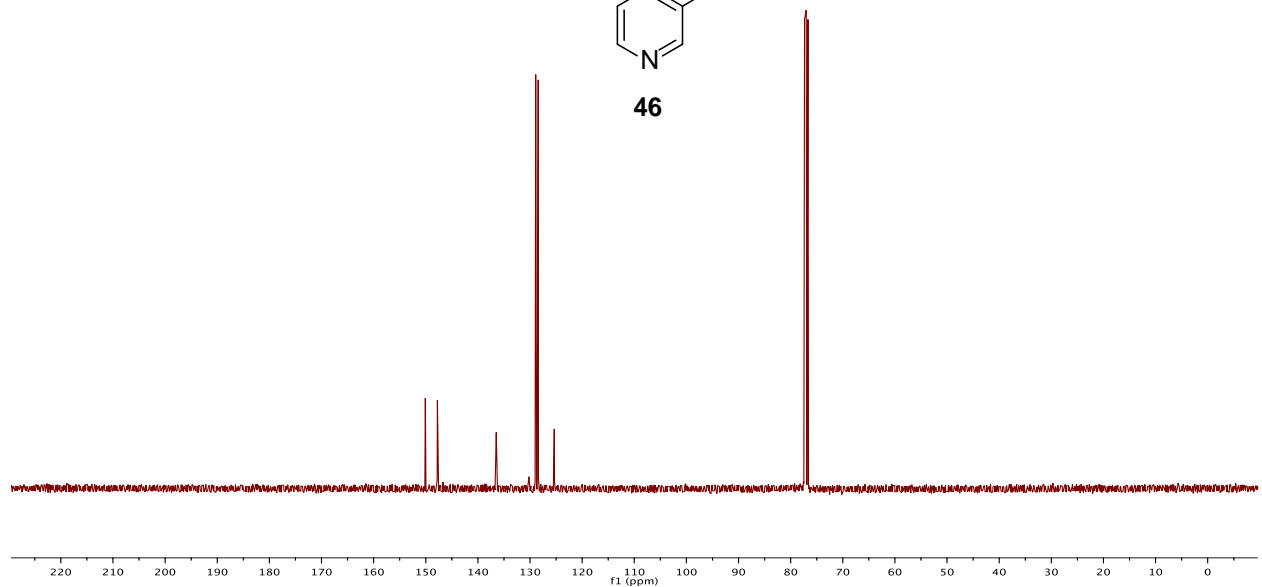

Proton NMR

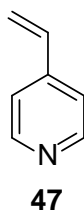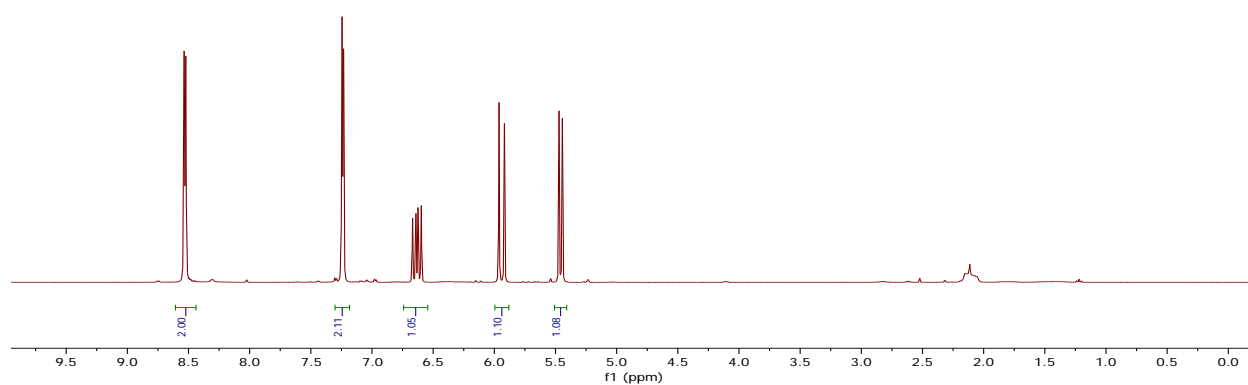

Carbon NMR

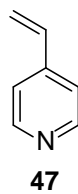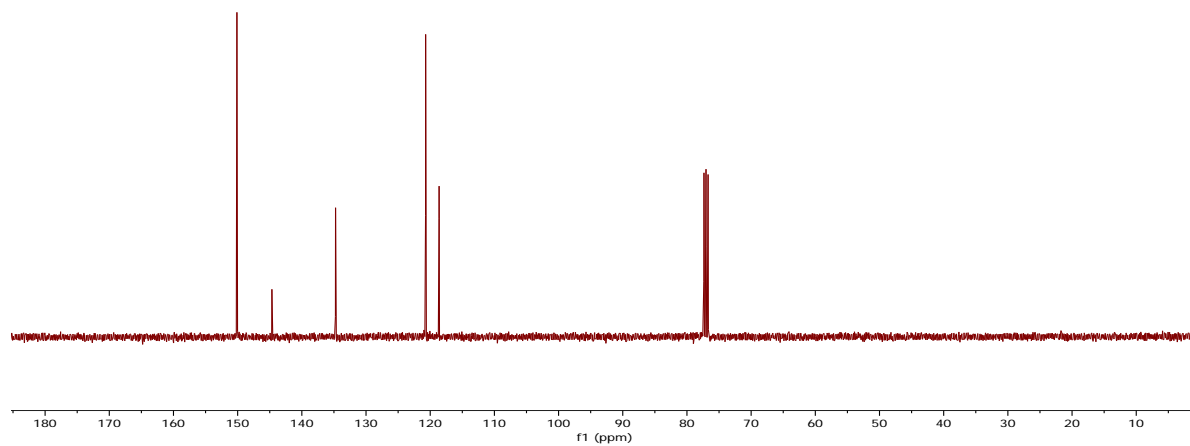

Proton NMR

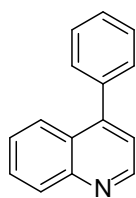

**48**

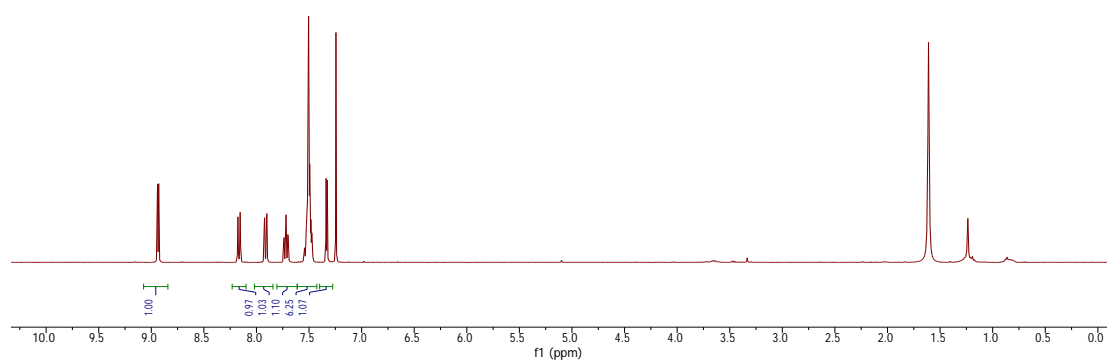

Carbon NMR

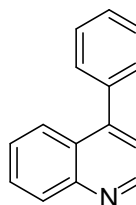

**48**

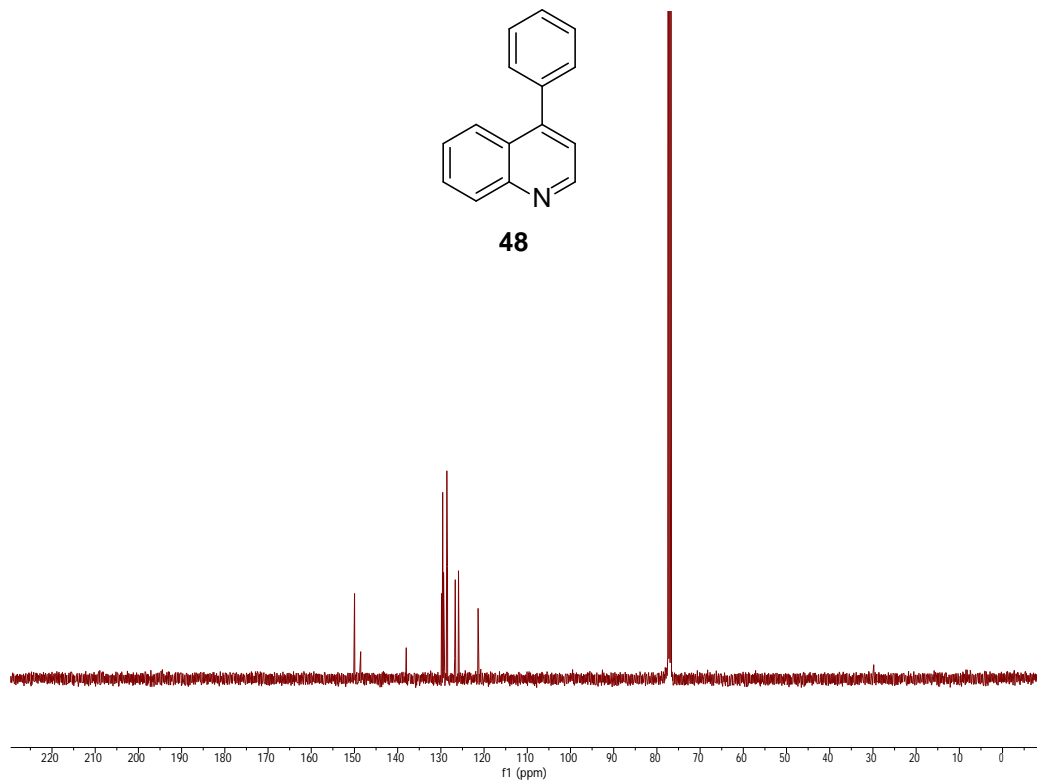

### Proton NMR

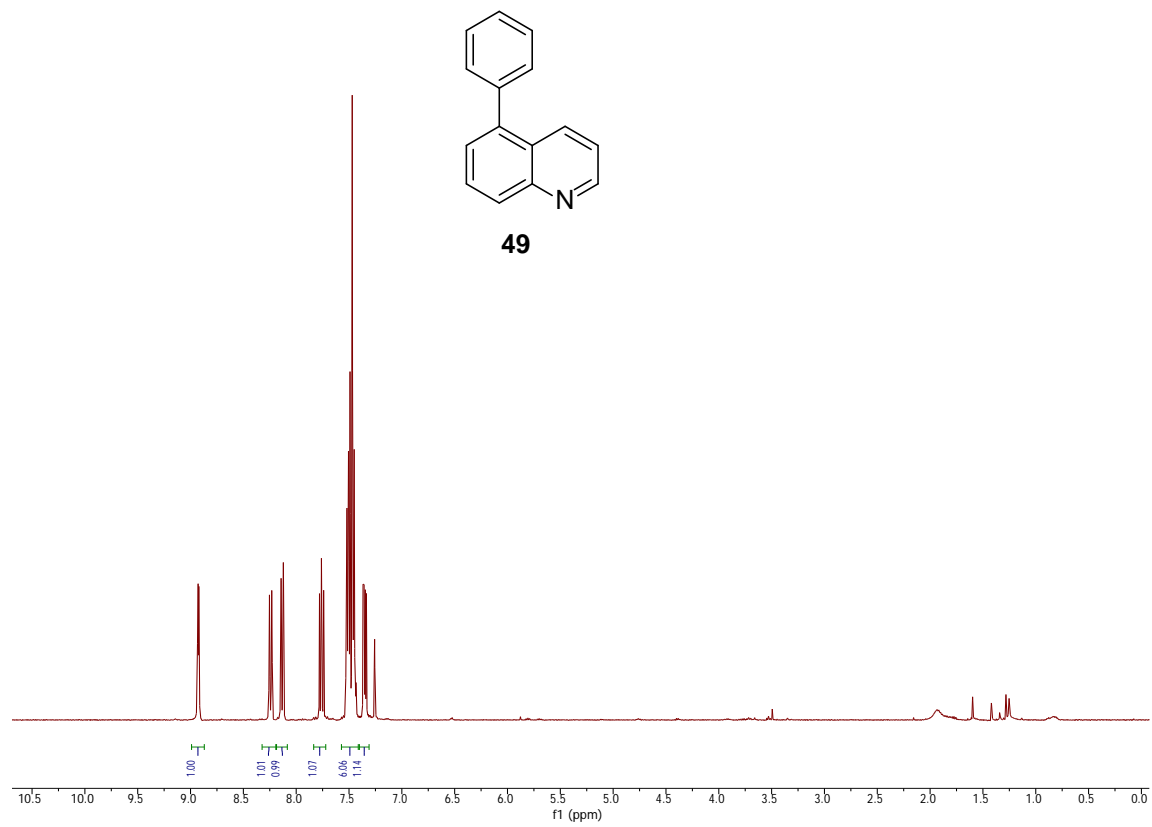

### Carbon NMR

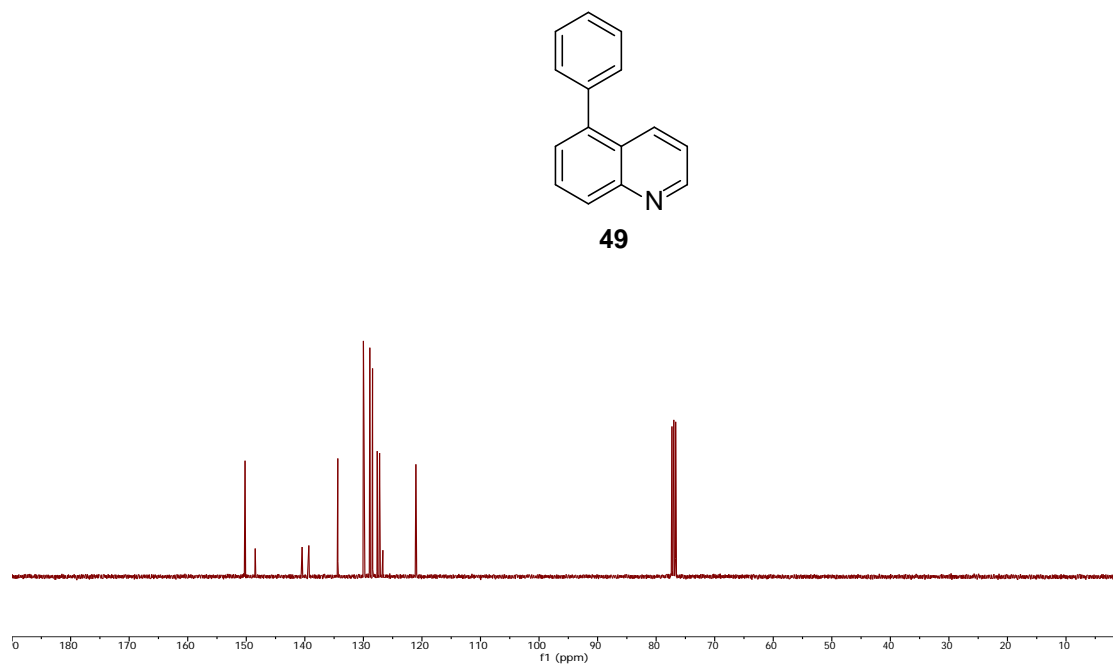

## Proton NMR

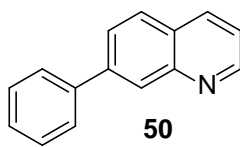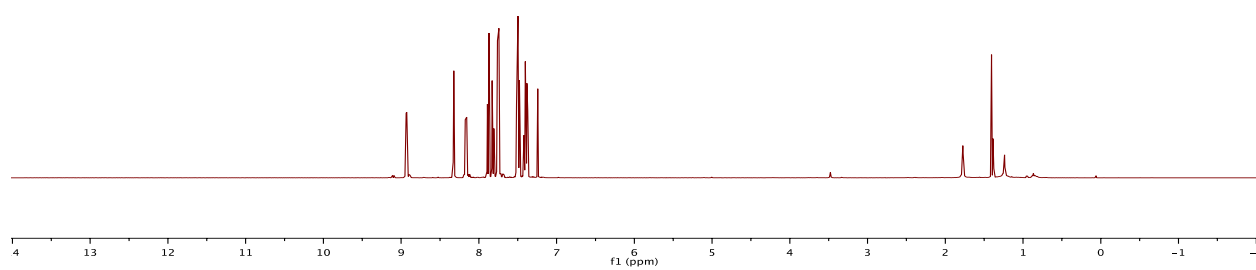

## Carbon NMR

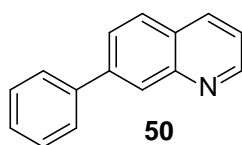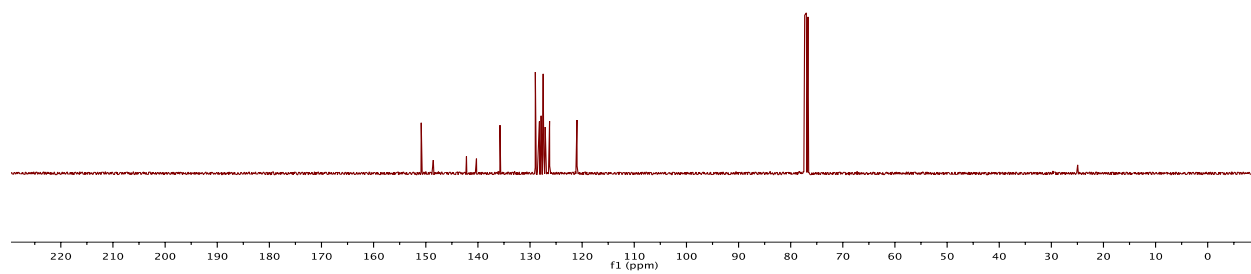

## Proton NMR

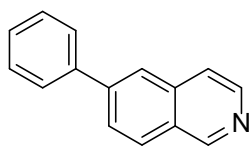

**51**

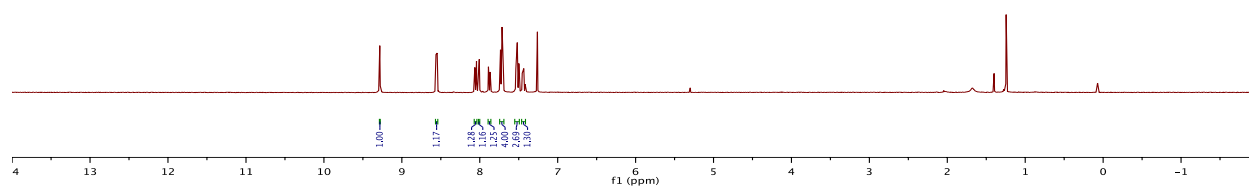

## Carbon NMR

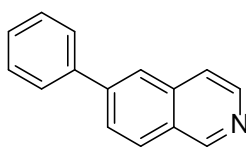

**51**

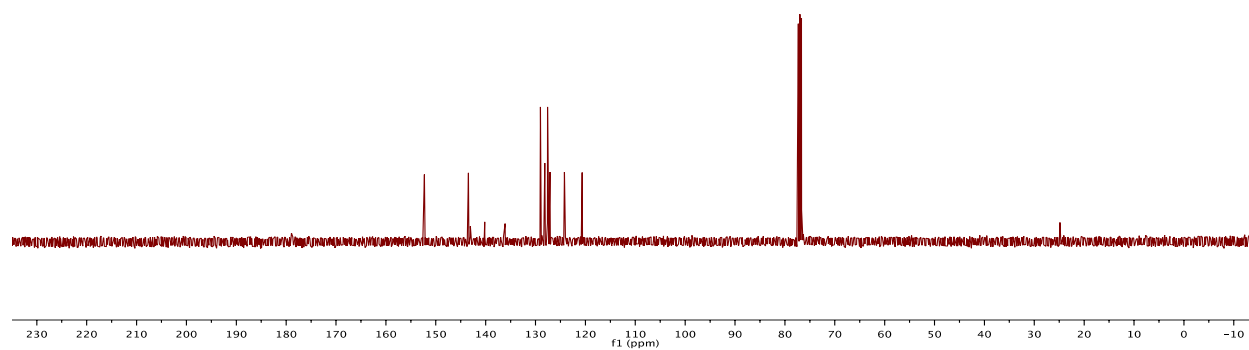



# Proton NMR

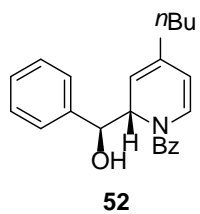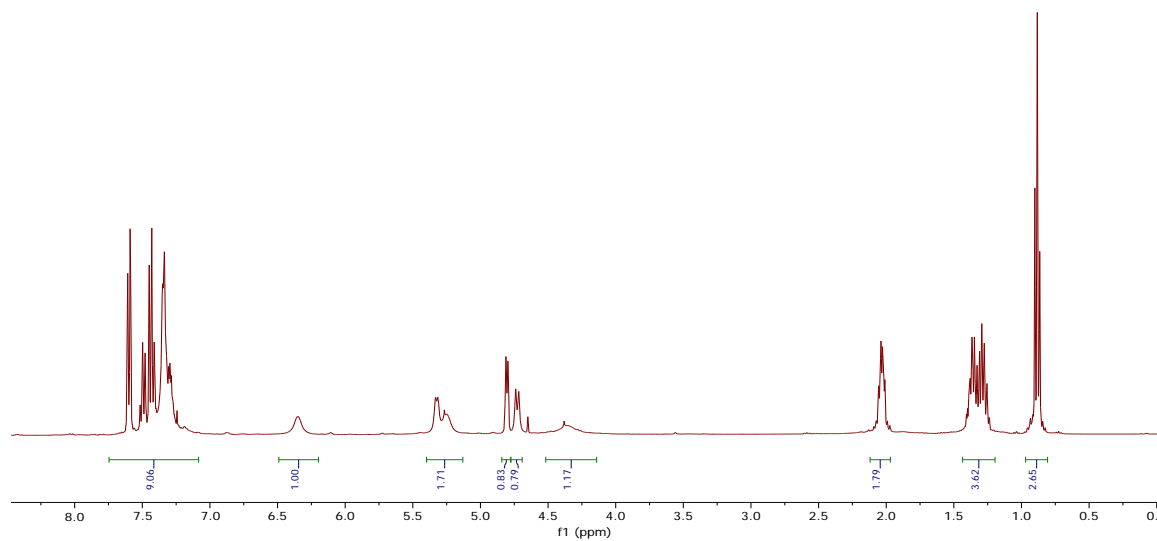

# Carbon NMR

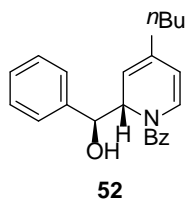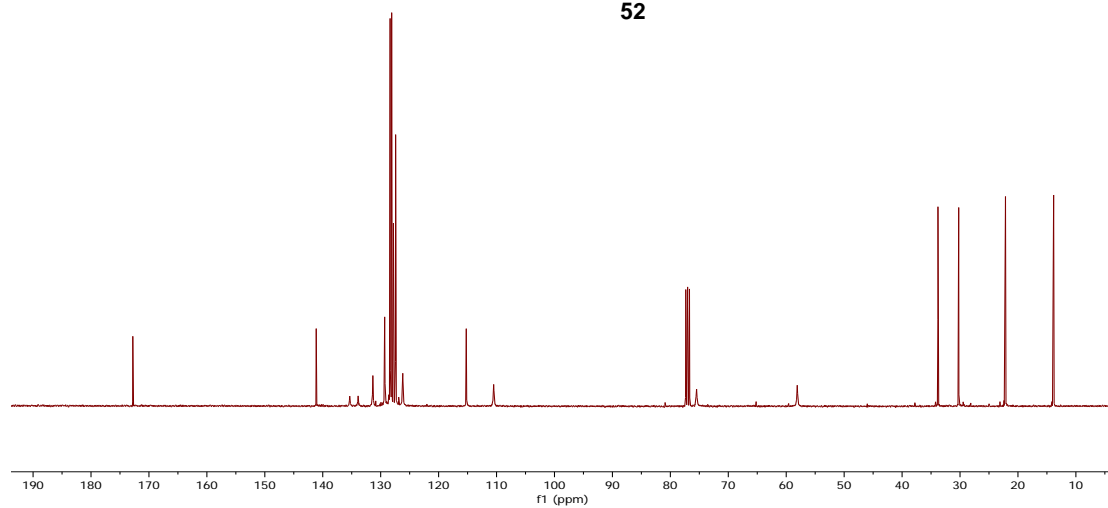

HSQC

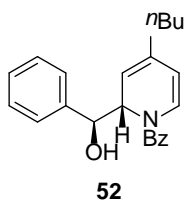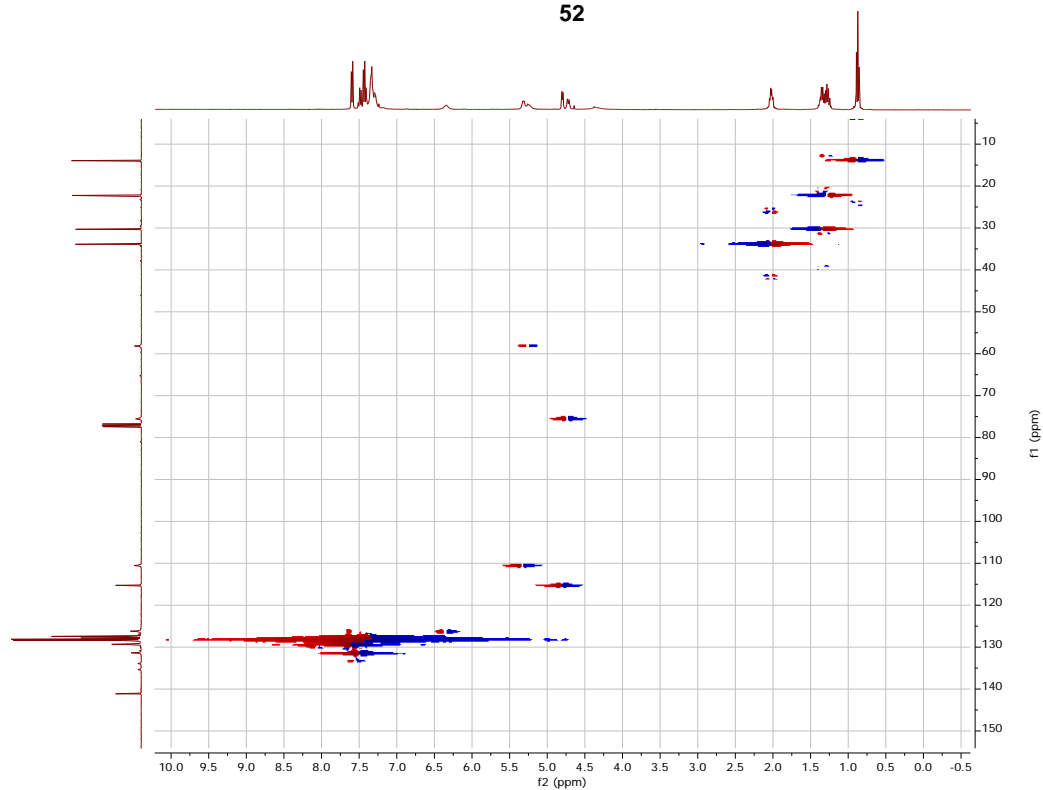

HMBC

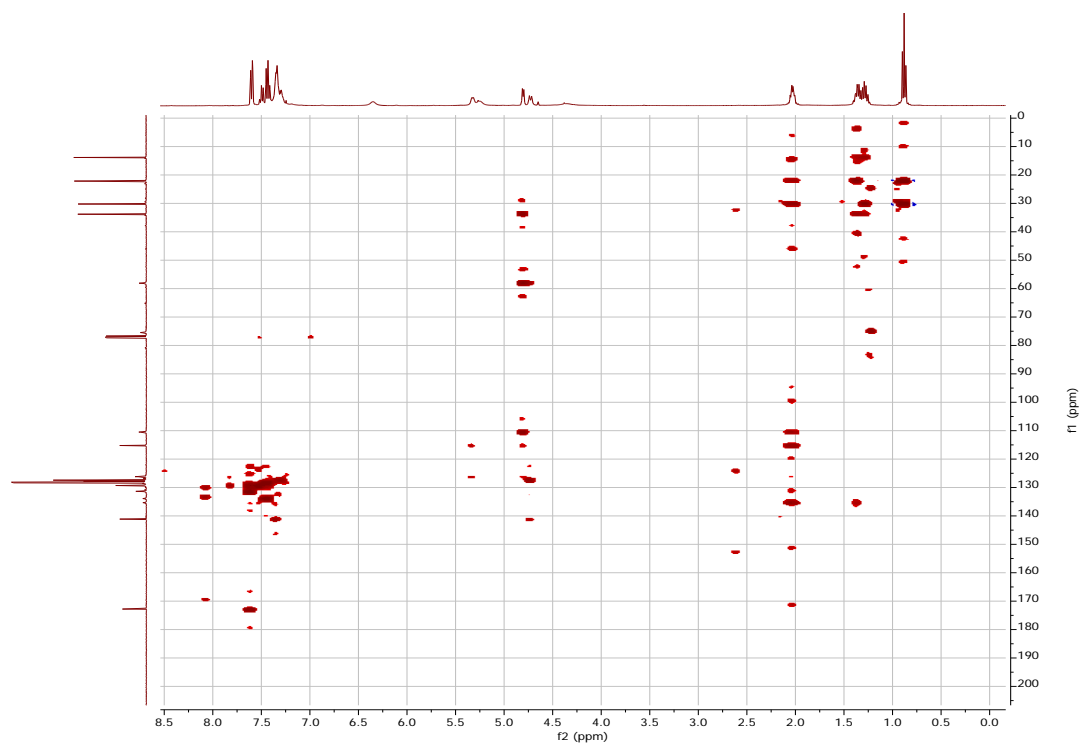

gCOSY

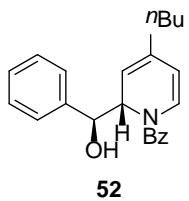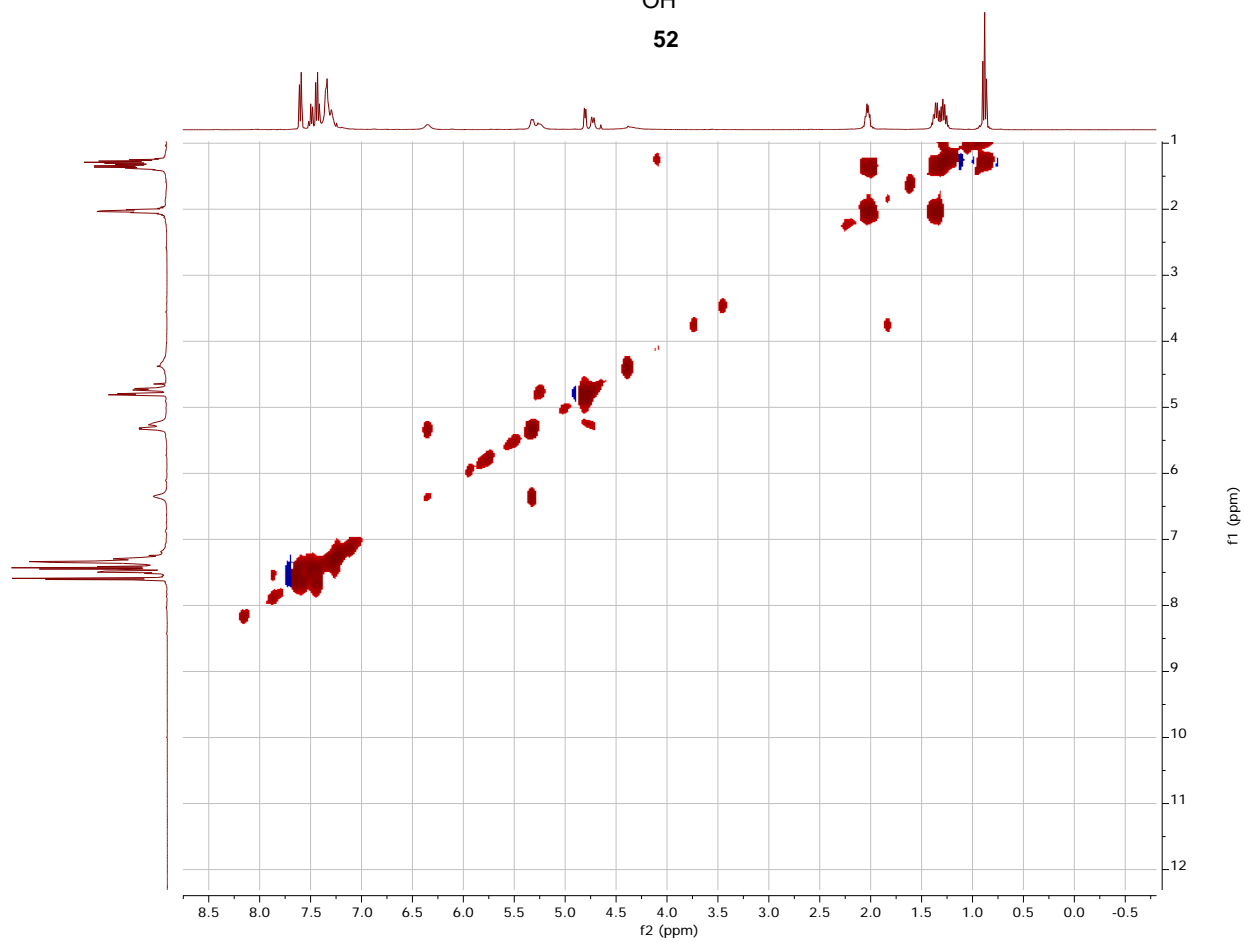

Proton NMR

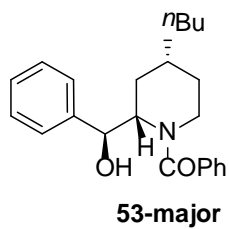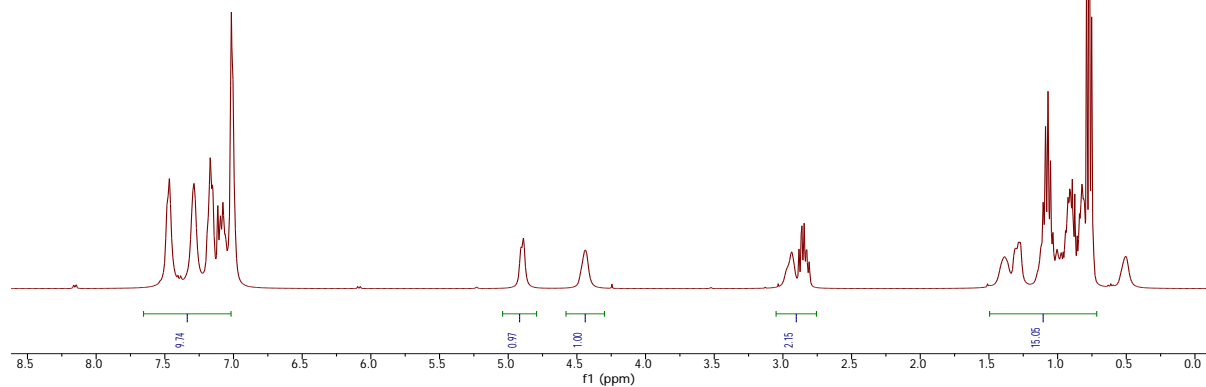

Carbon NMR

CARBON\_01

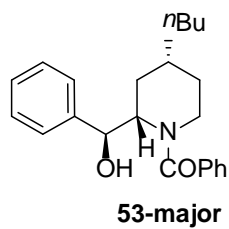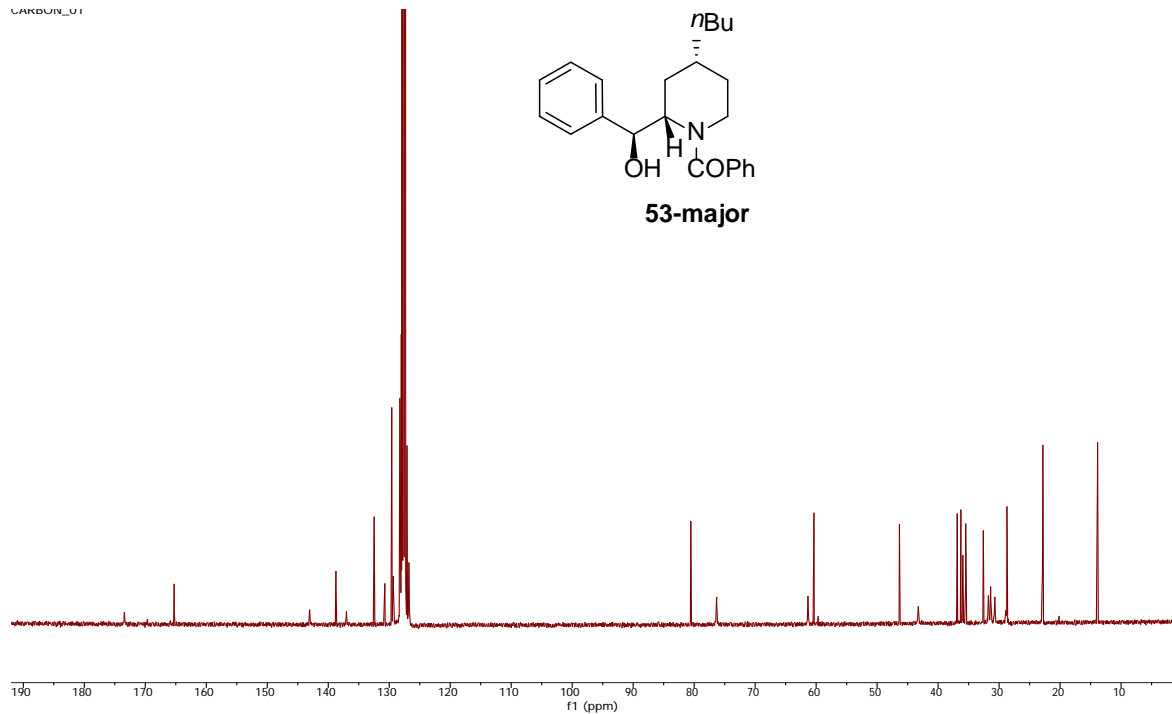

### Proton NMR

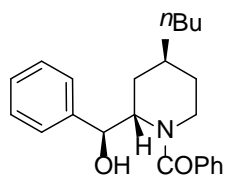

**53-minor**

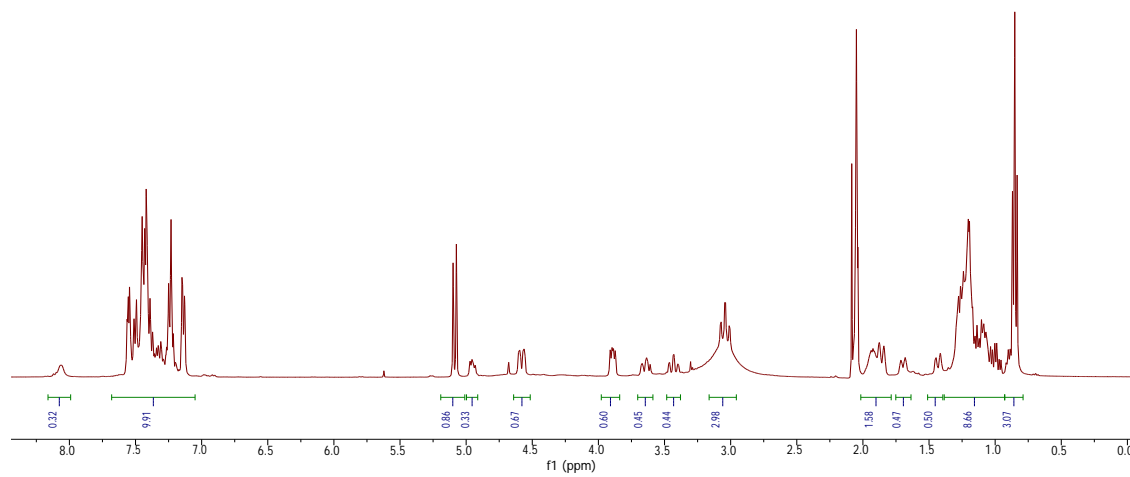

### Carbon NMR

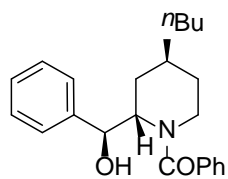

**53-minor**

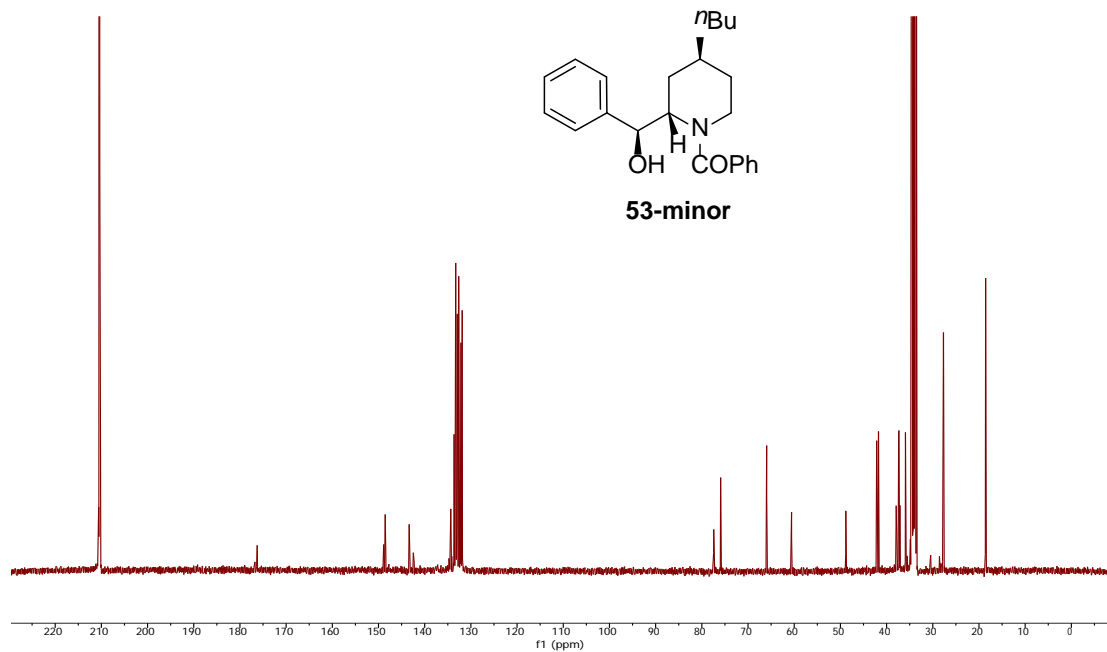

# Proton NMR

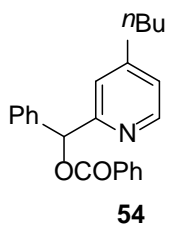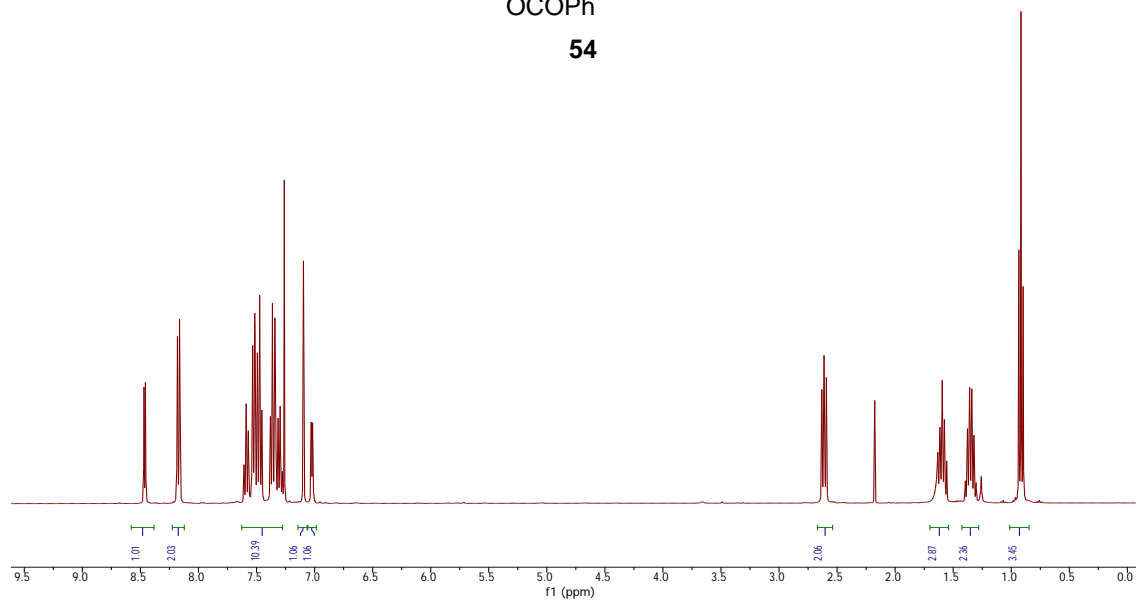

# Carbon NMR

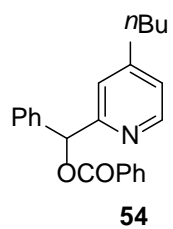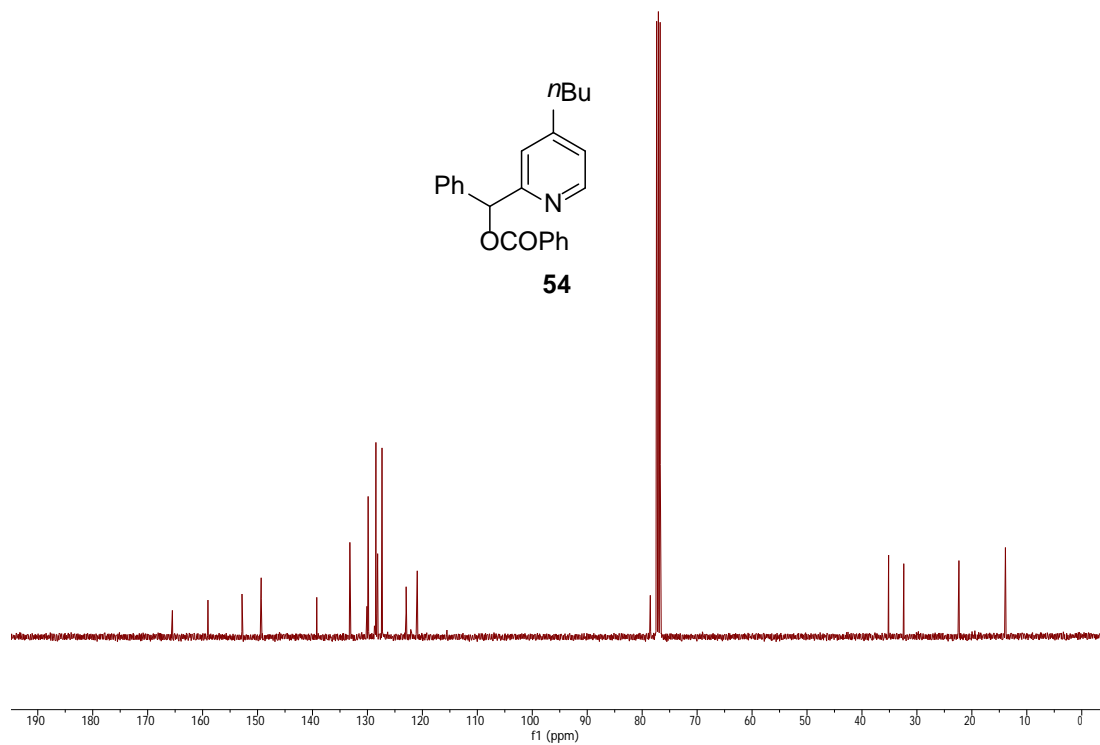

gCOSY

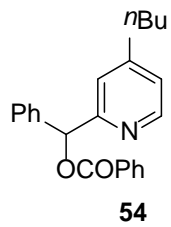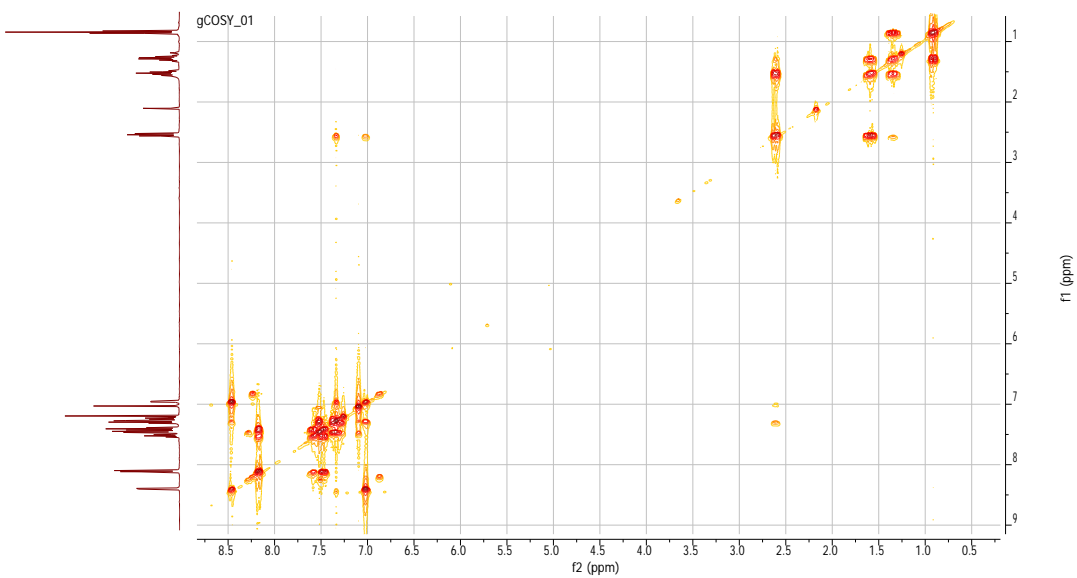

DEPT

DEPT\_01

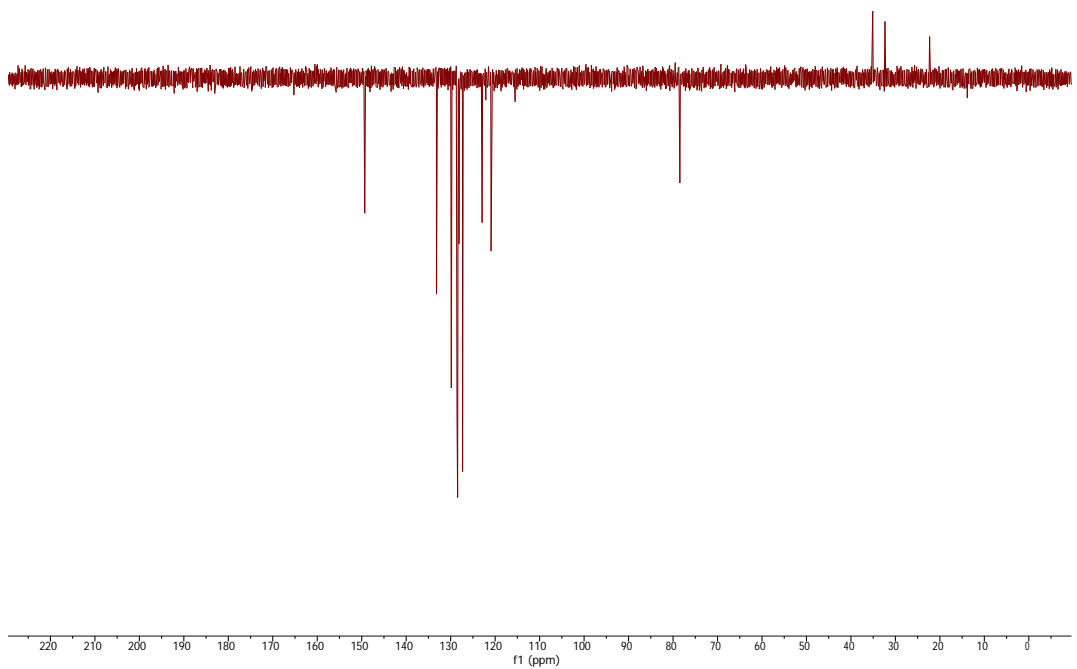

Proton NMR

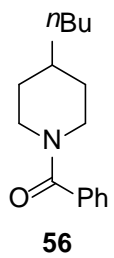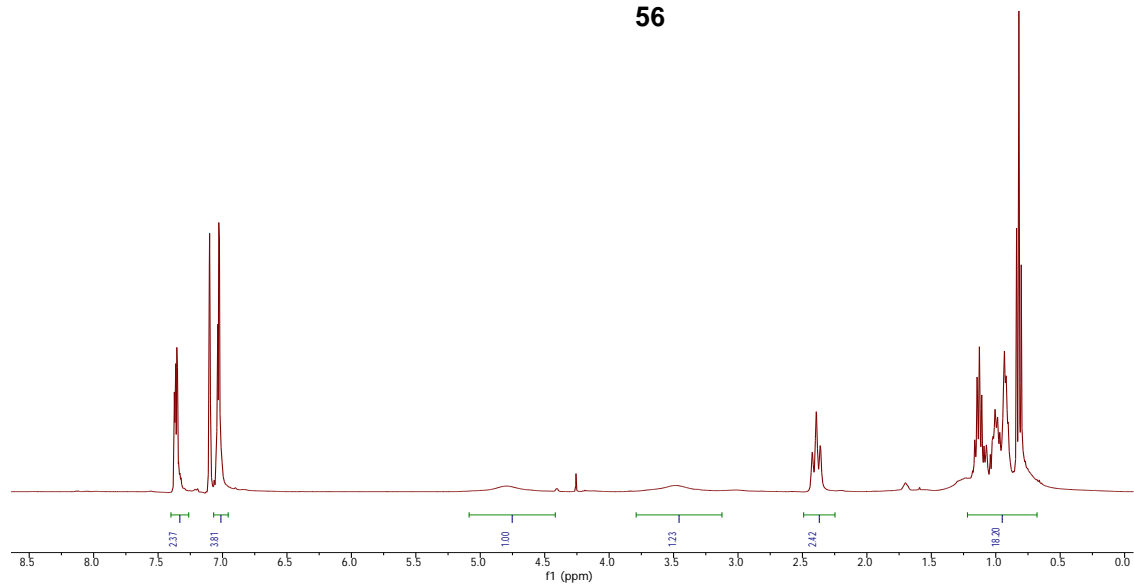

Carbon NMR

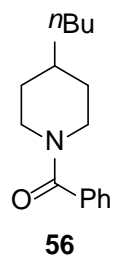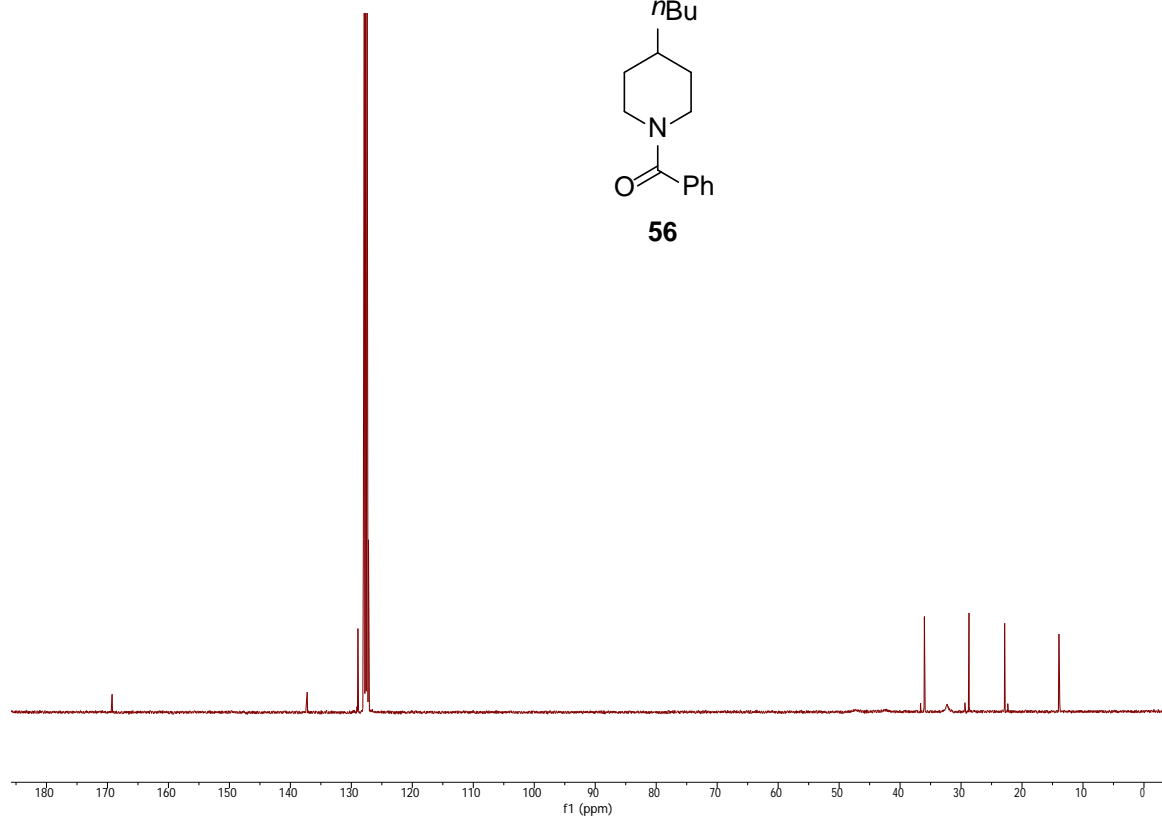



Proton NMR

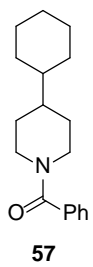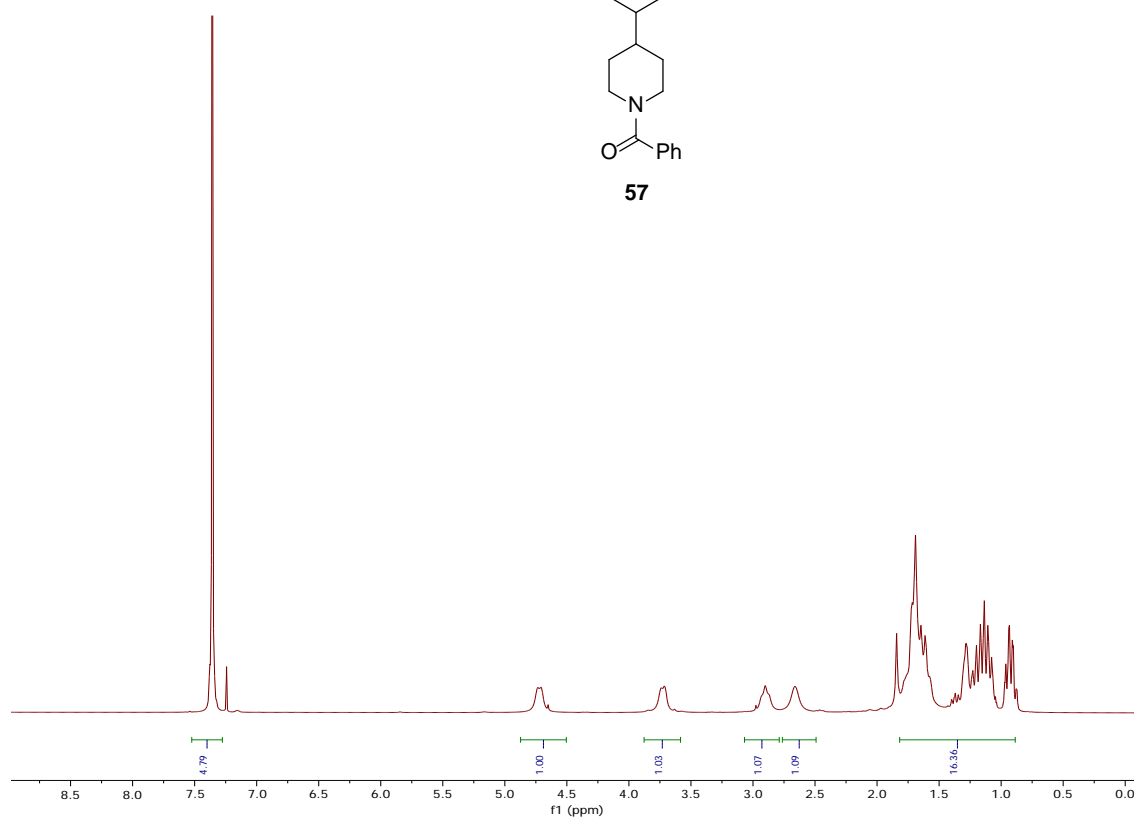

Carbon NMR

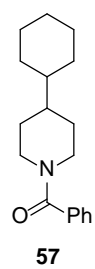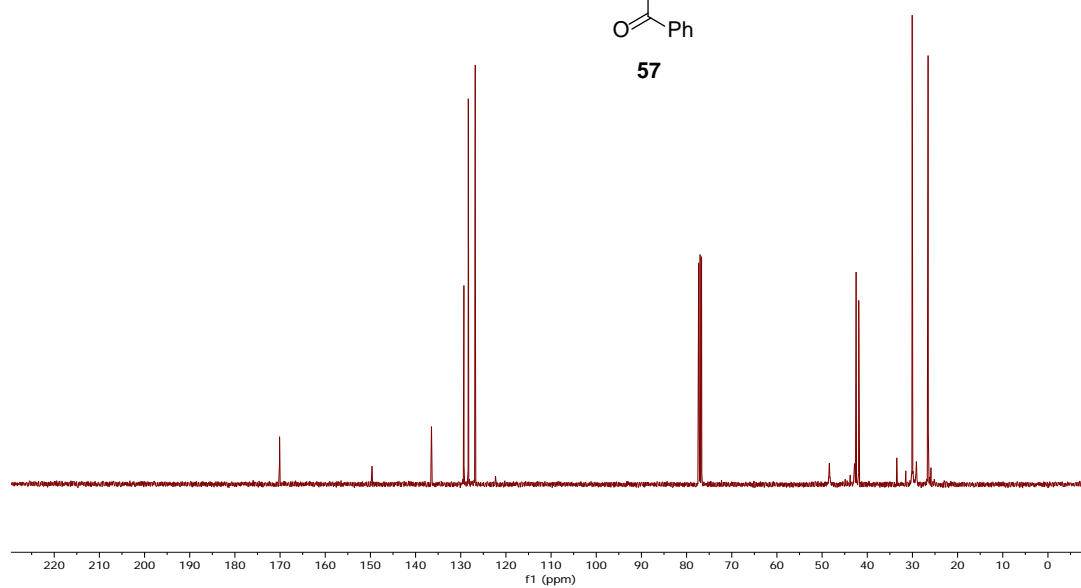

Proton NMR

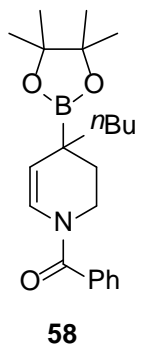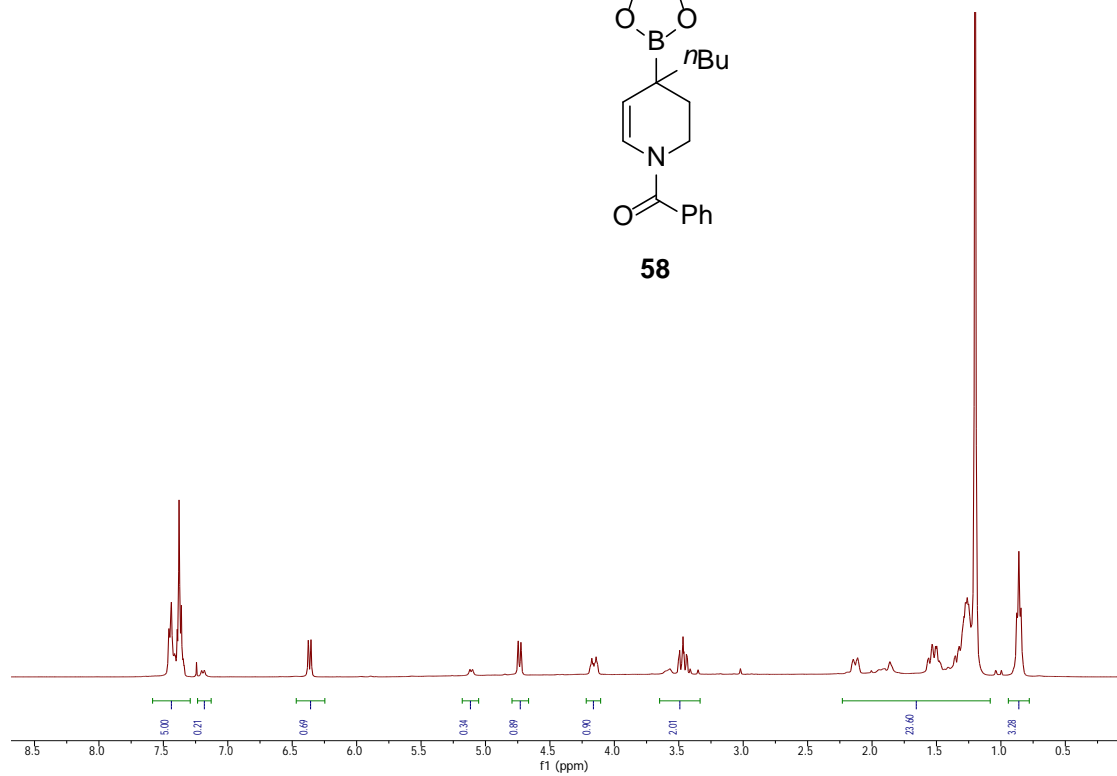

Carbon NMR

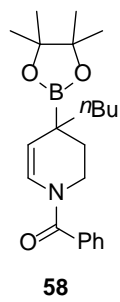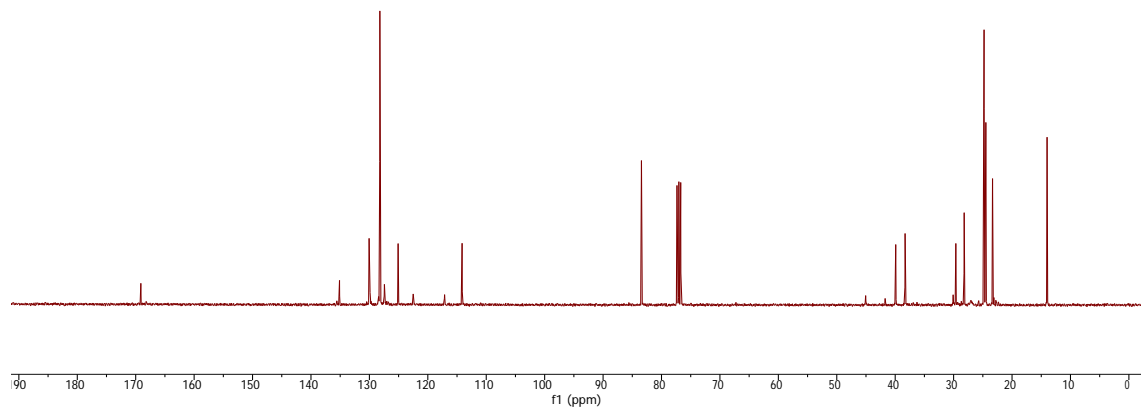

Proton NMR

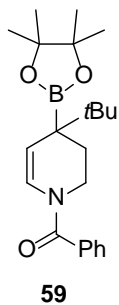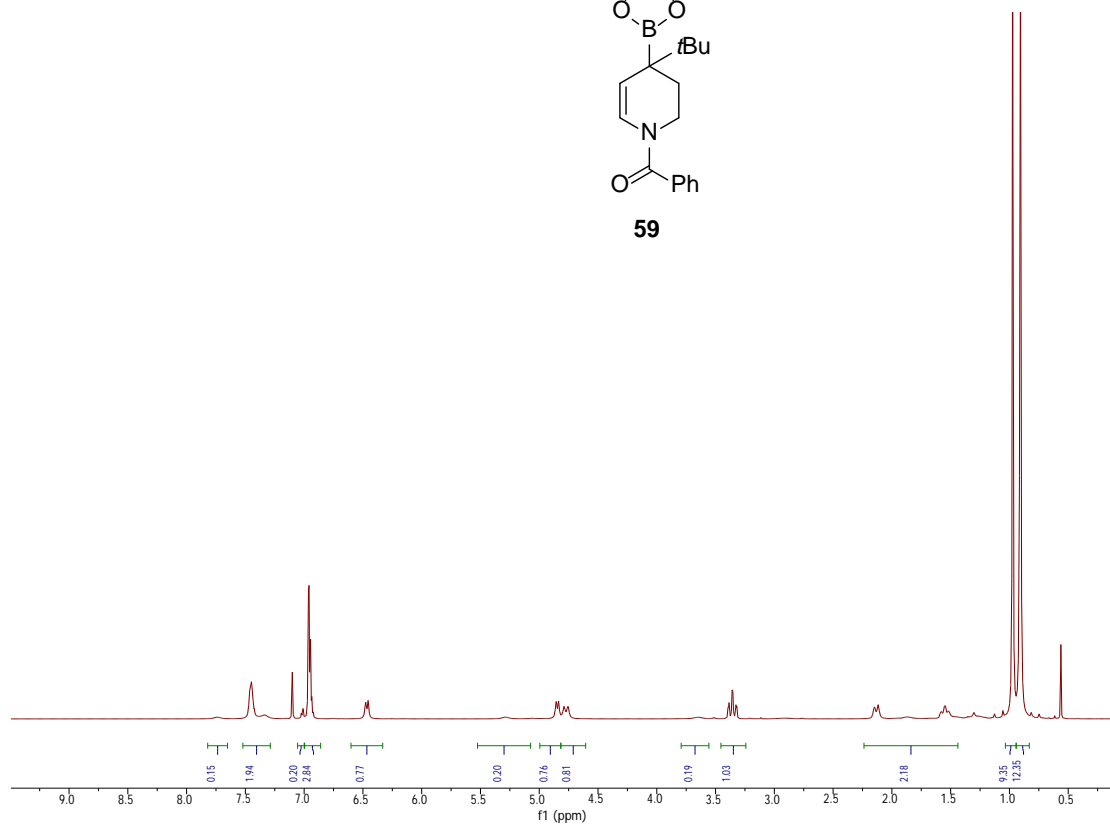

Carbon NMR

CARBON\_01

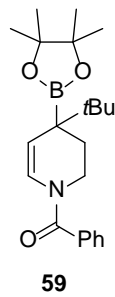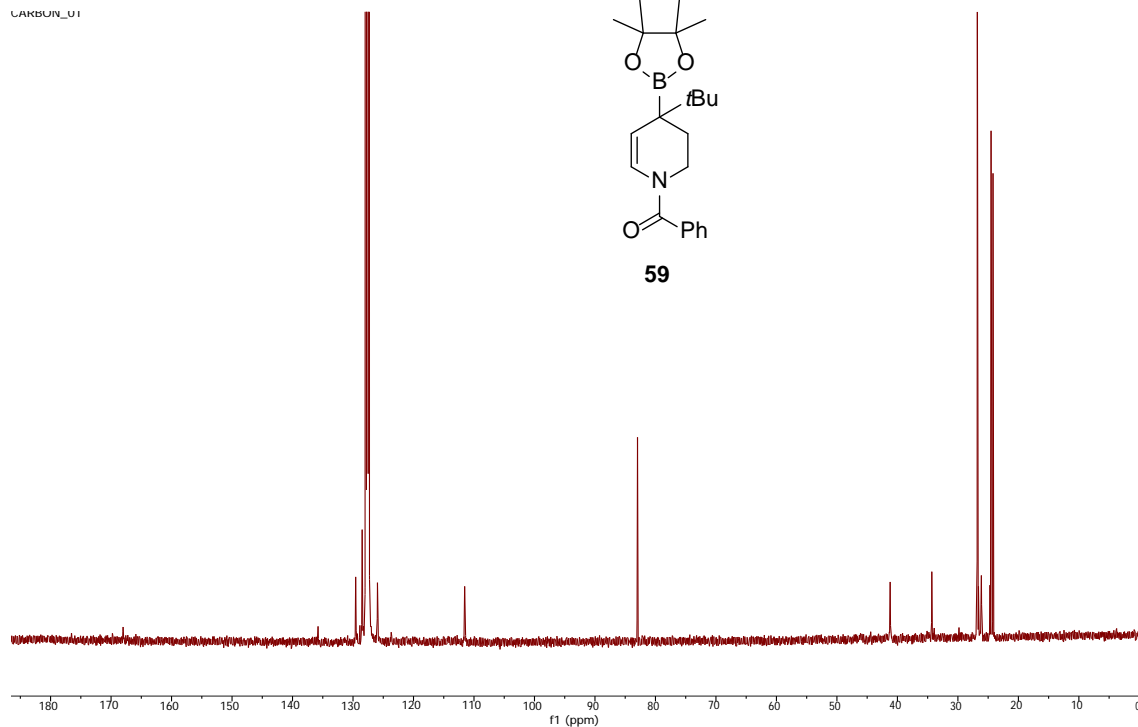

Proton NMR

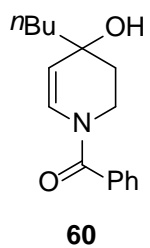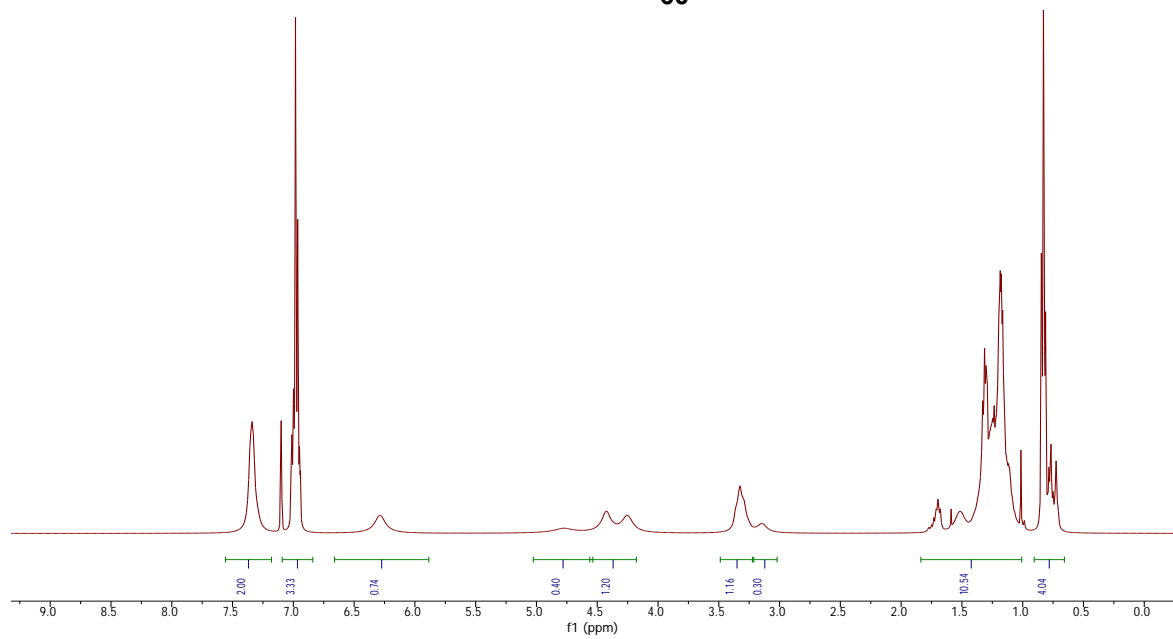

Carbon NMR

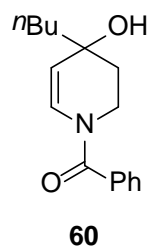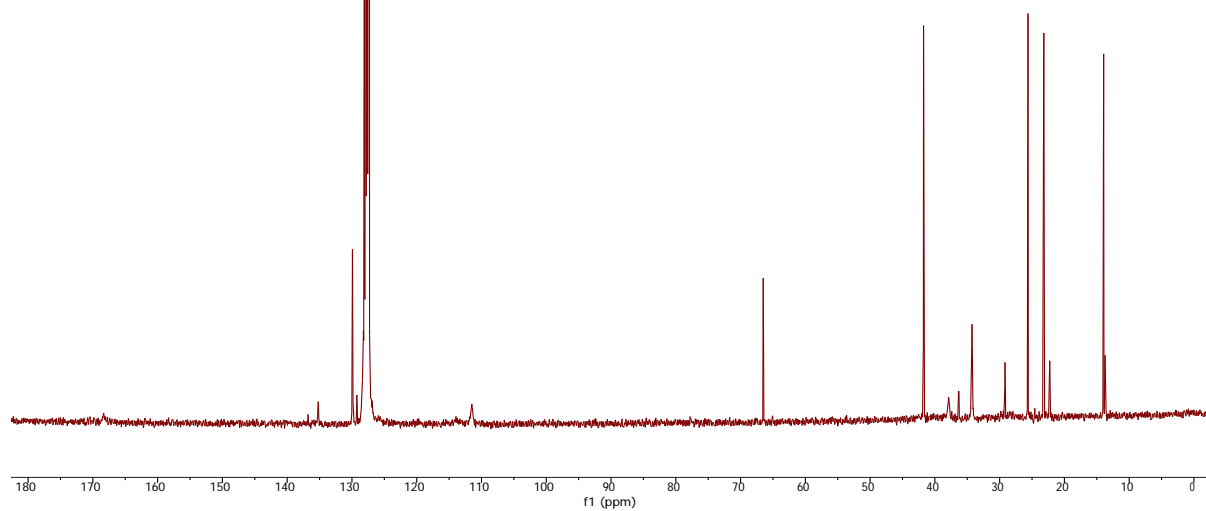

# Proton NMR

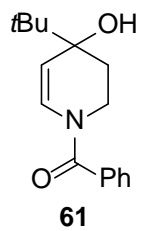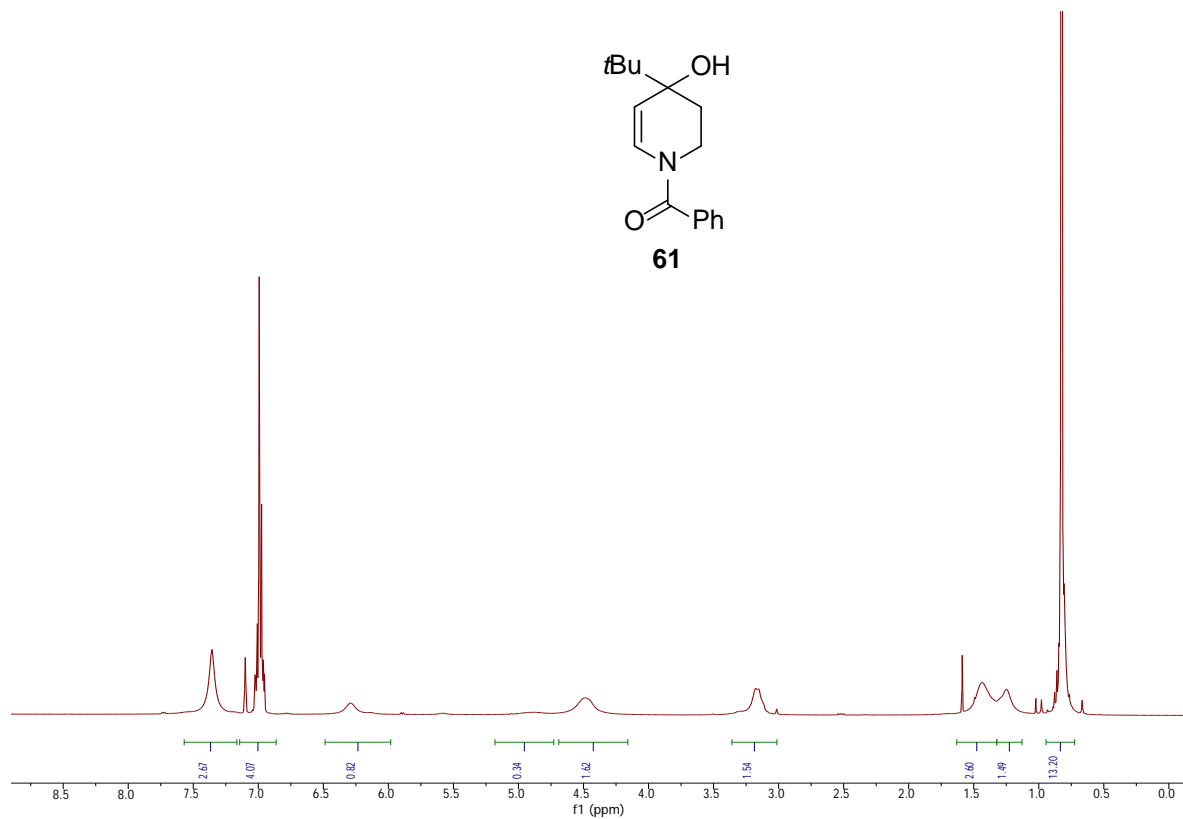

# Carbon NMR

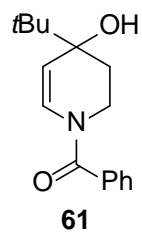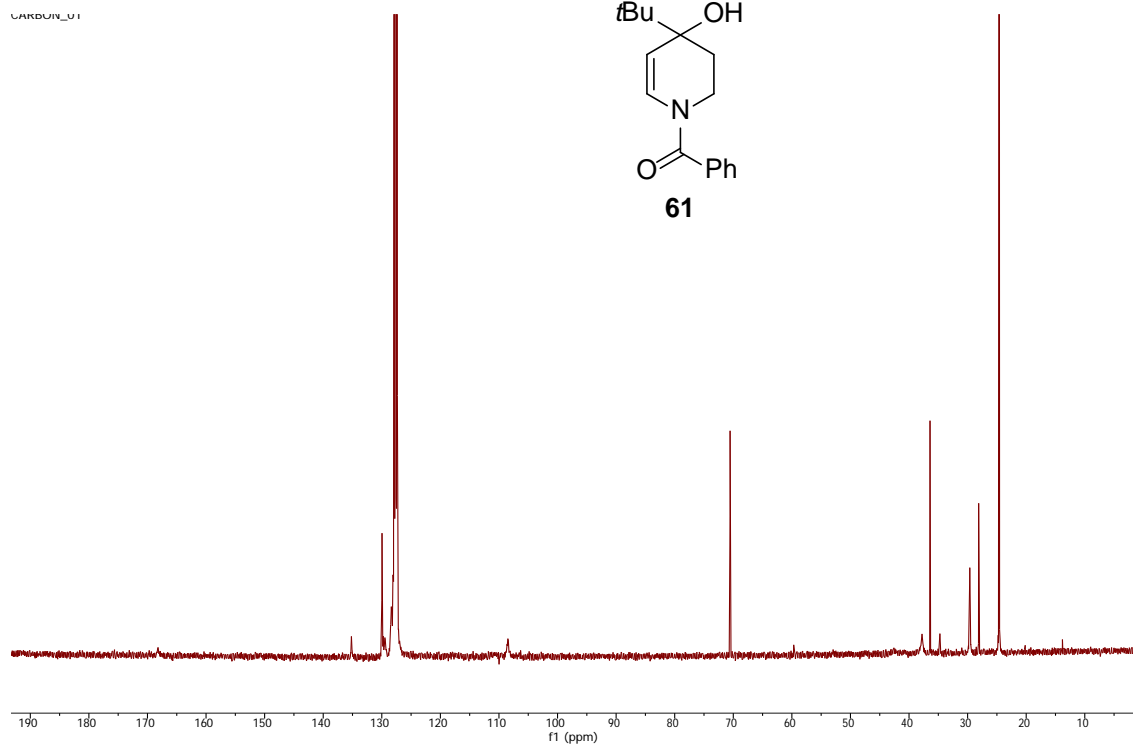

Proton NMR

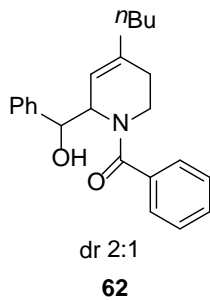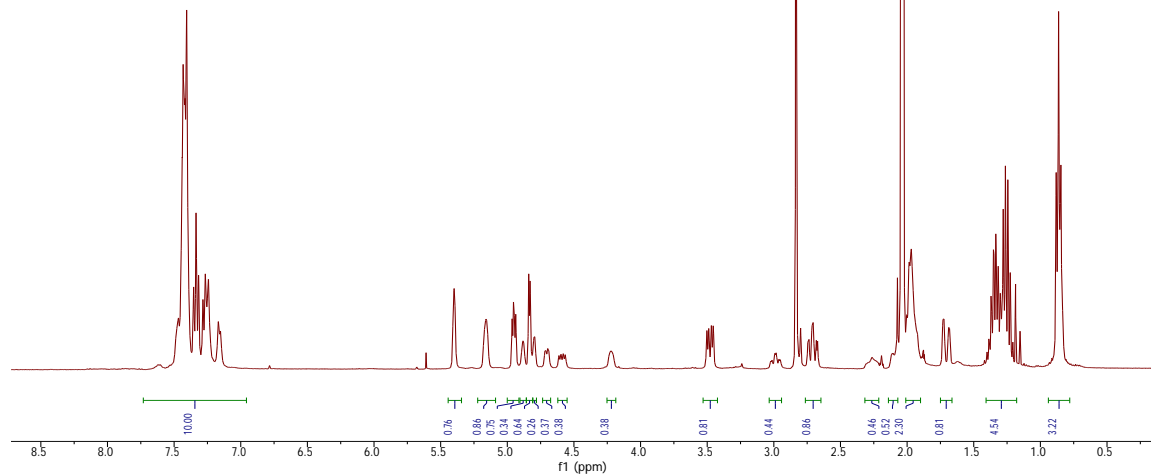

Carbon NMR

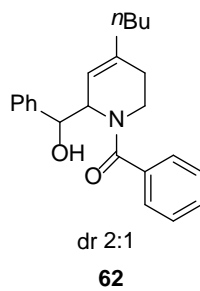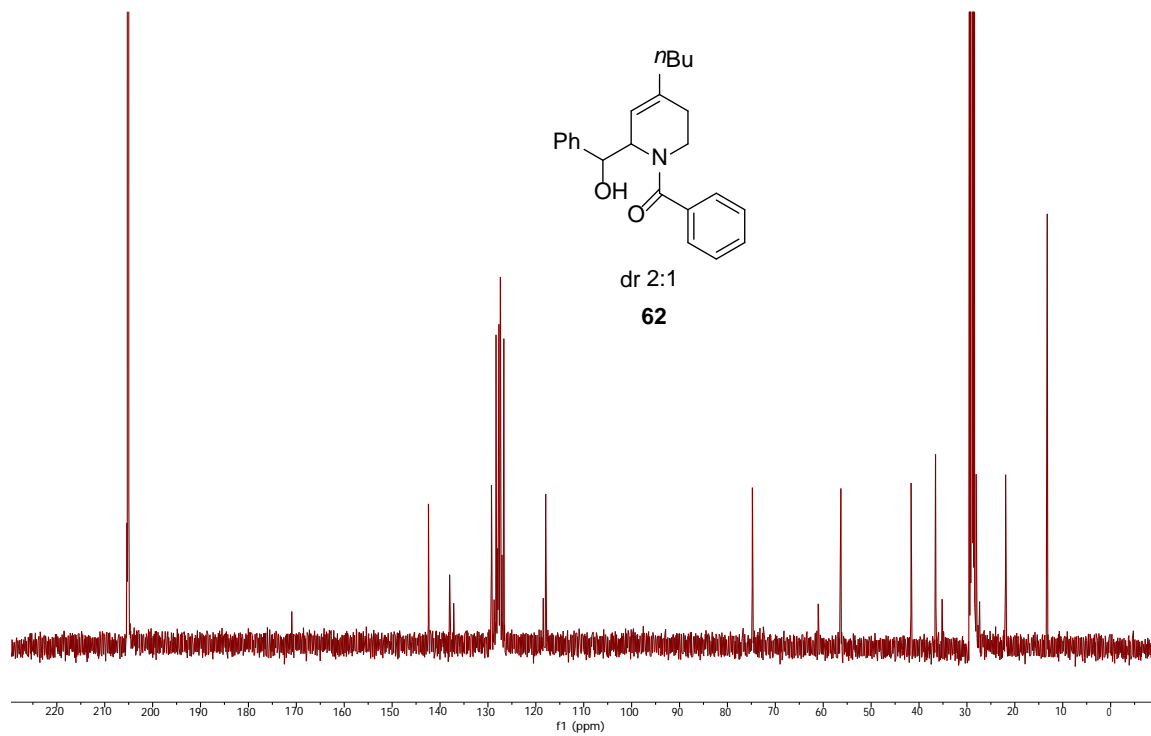

Proton NMR

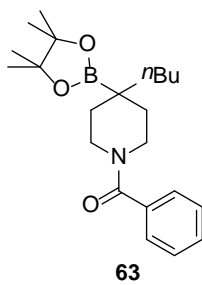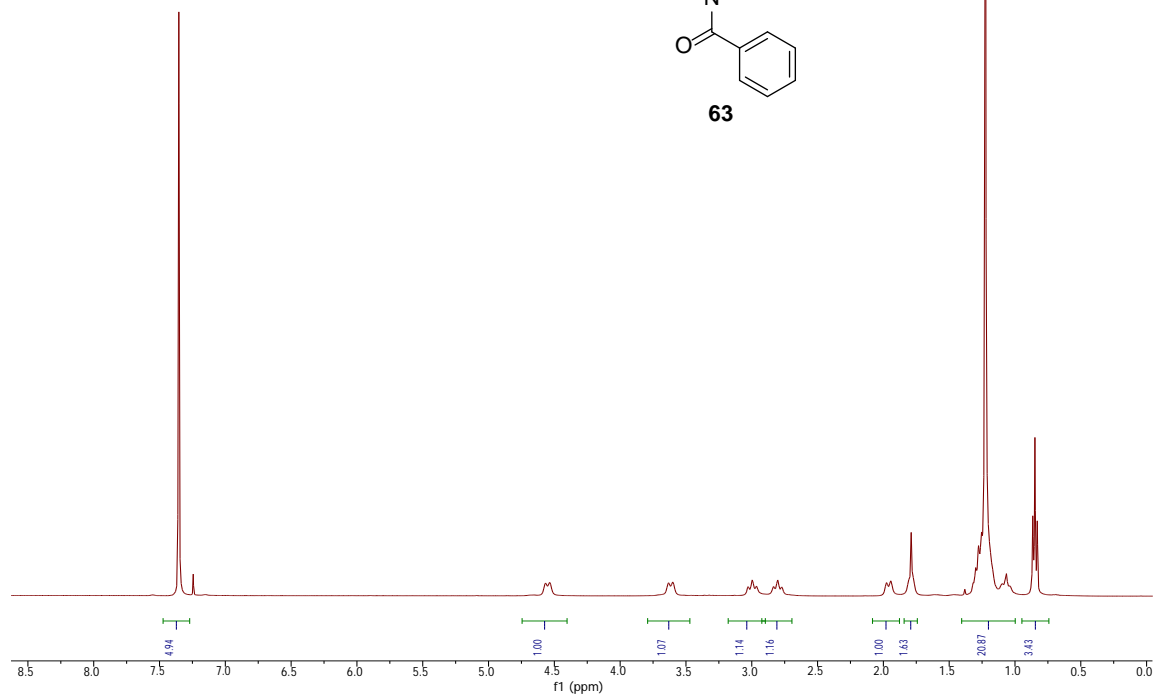

Carbon NMR

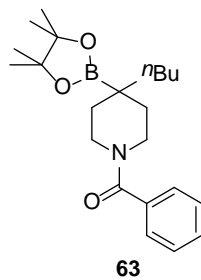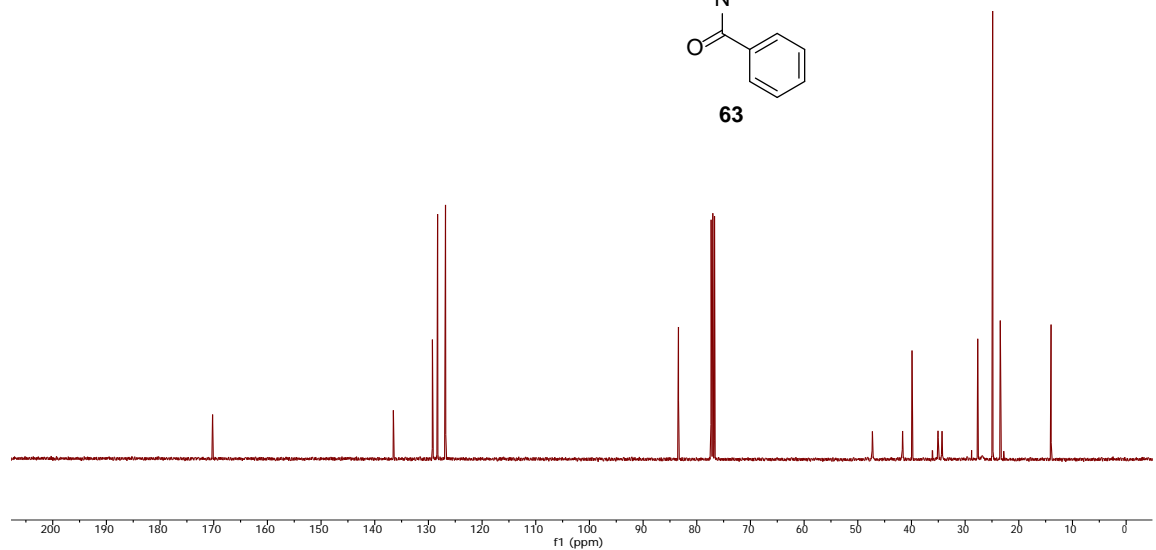

### Proton NMR

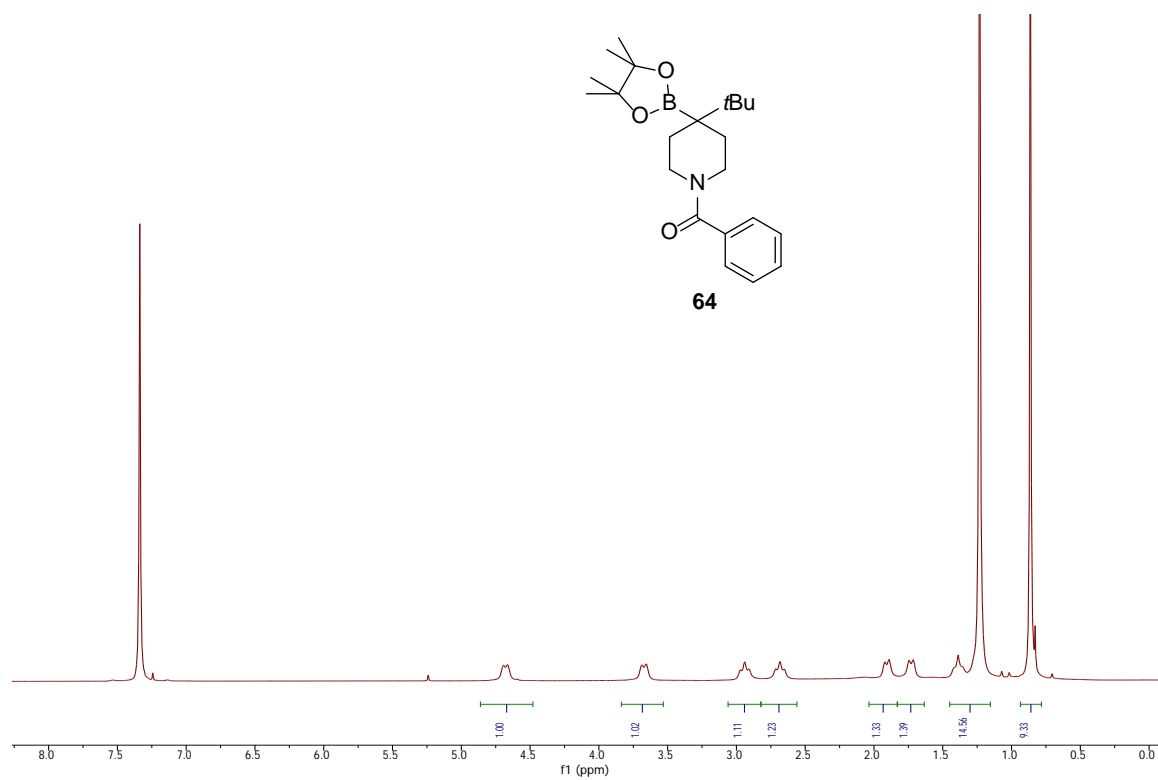

### Carbon NMR

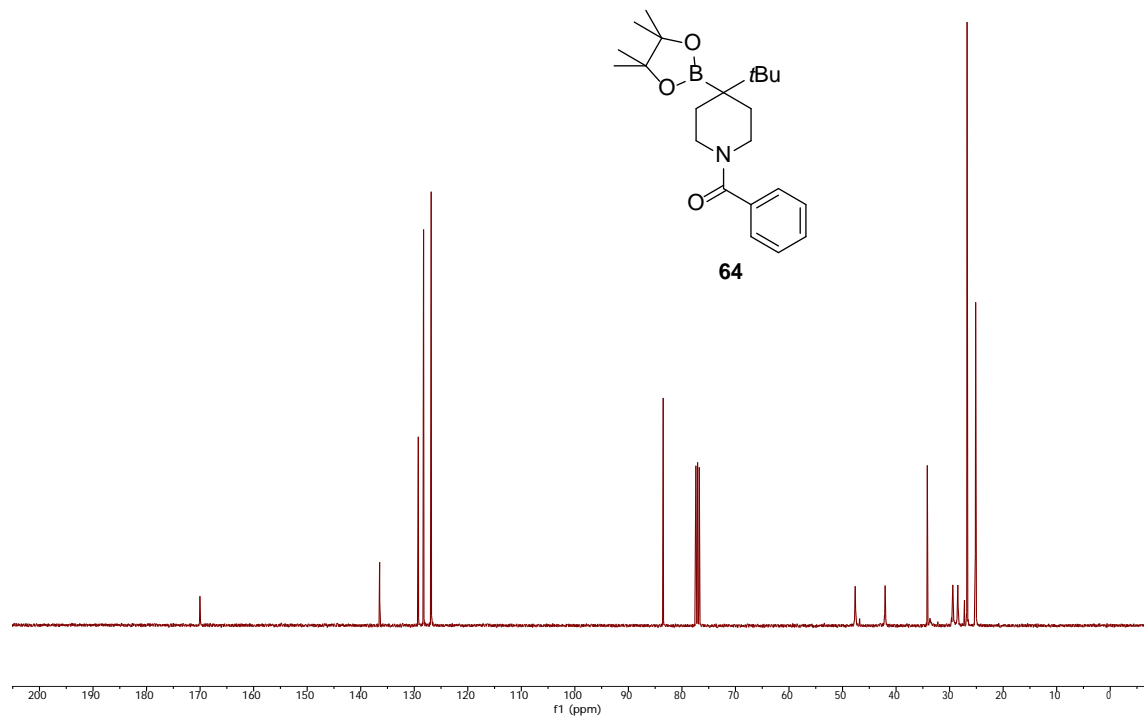



Proton NMR

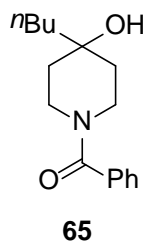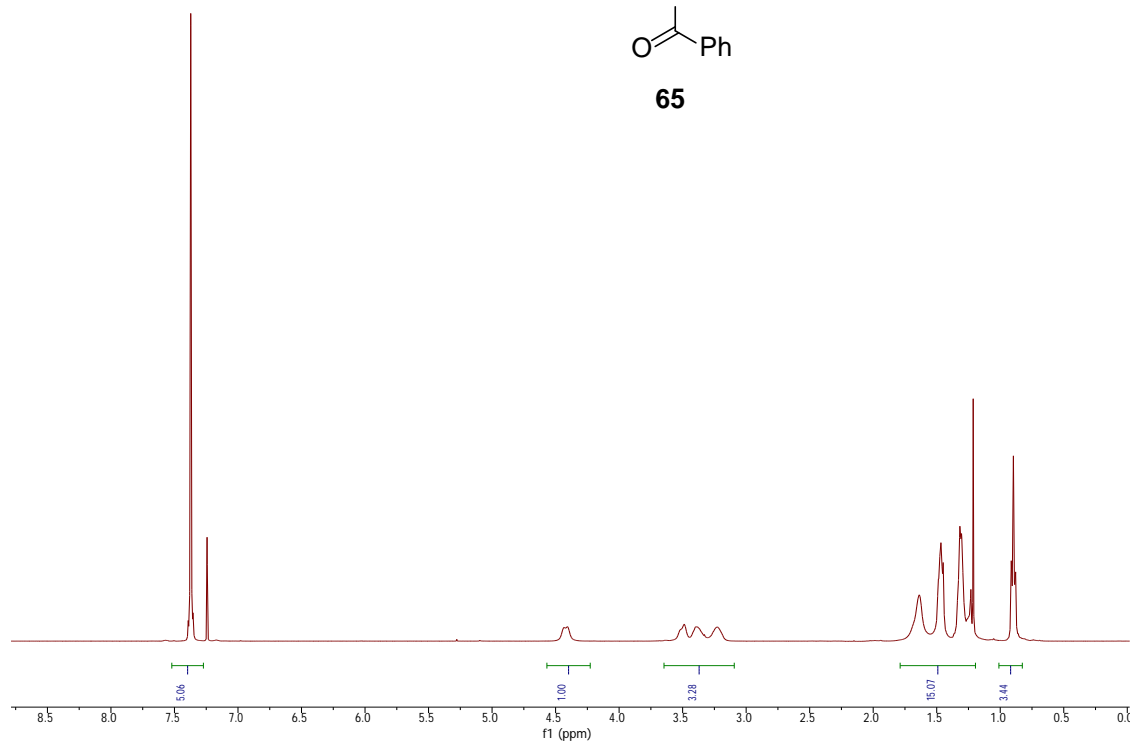

Carbon NMR

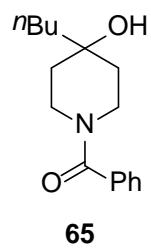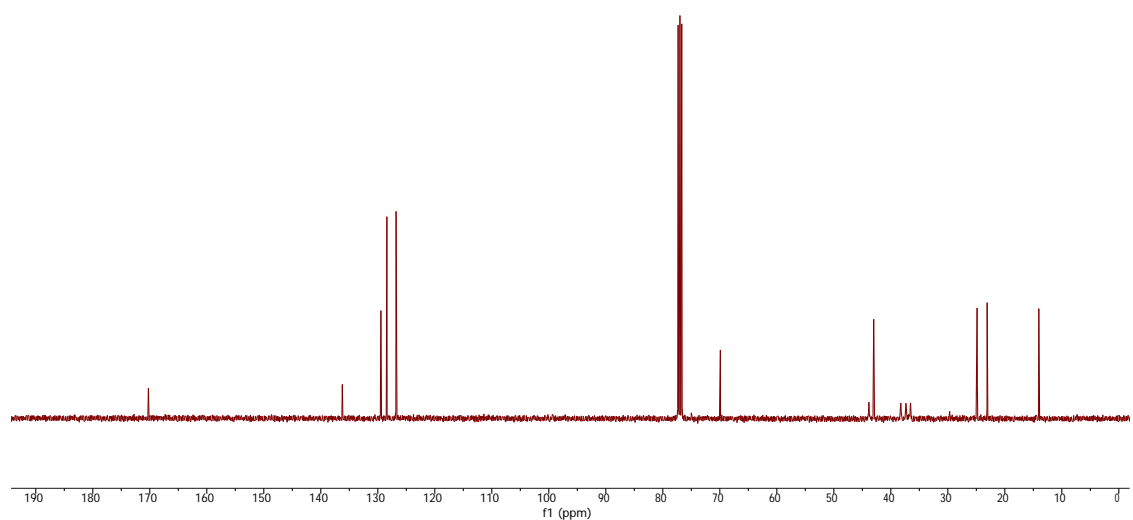

### Proton NMR

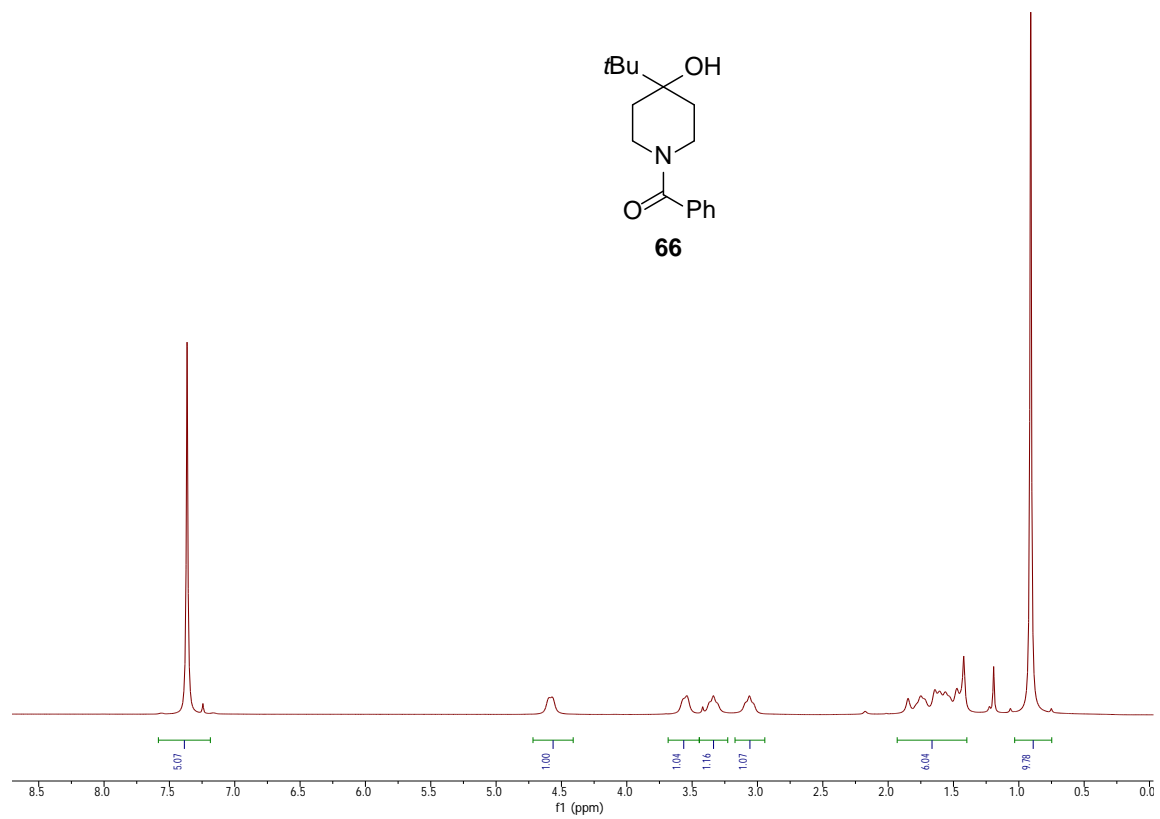

### Carbon NMR

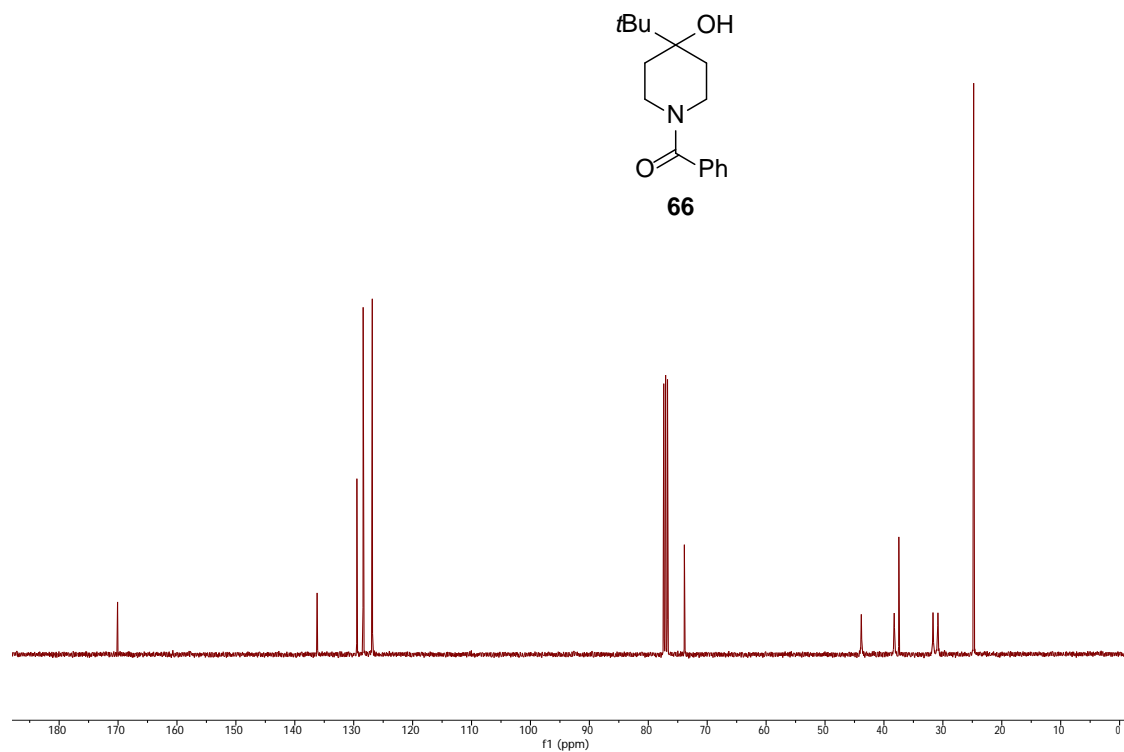

# Proton NMR

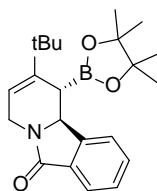

**68 (anti)**

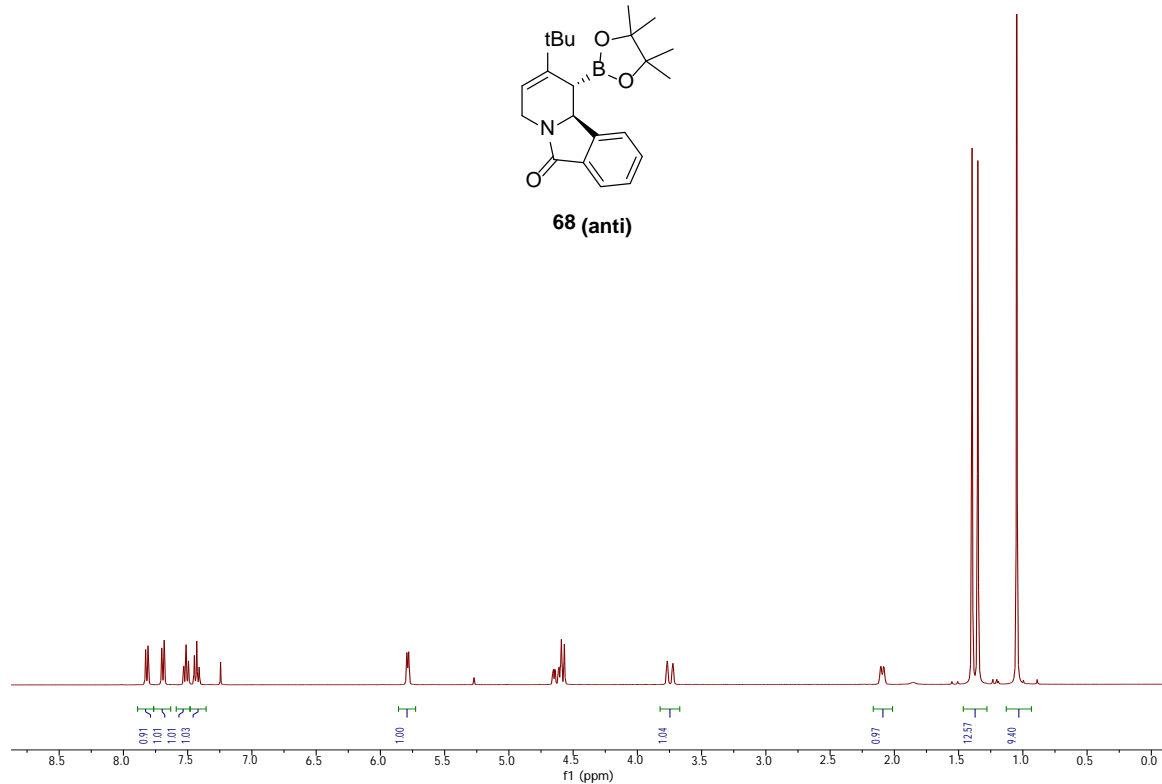

# Carbon NMR

UAKBUN\_U.1

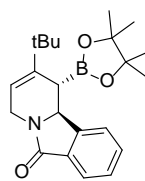

**68 (anti)**

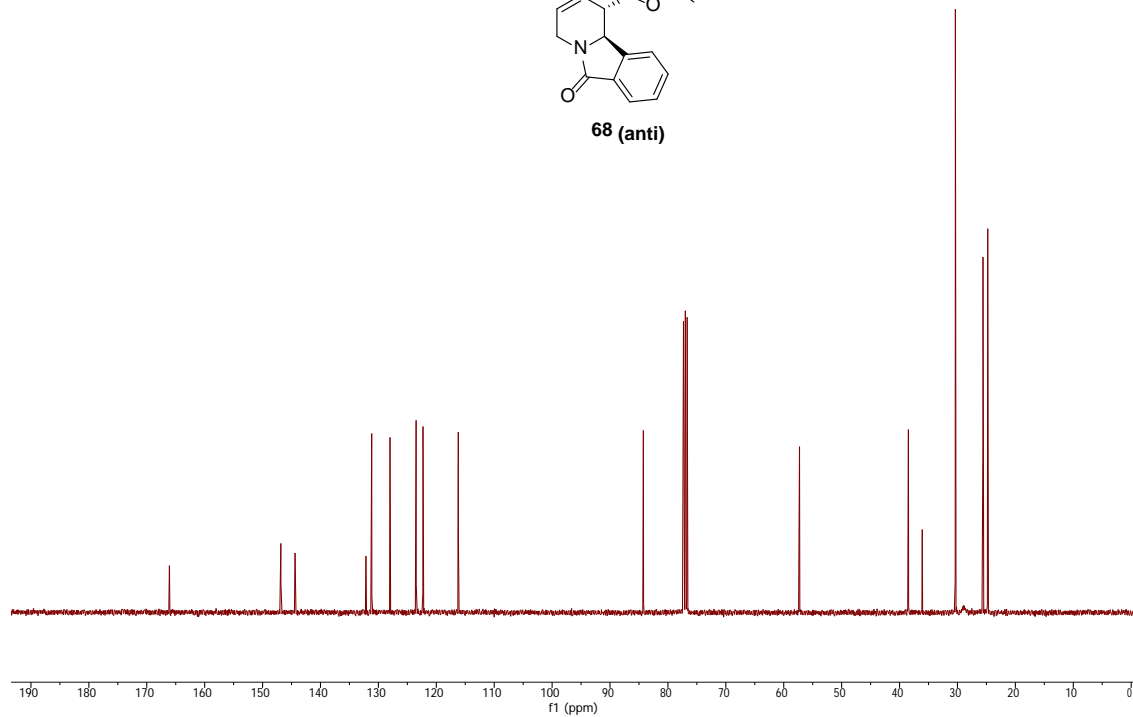

Proton NMR

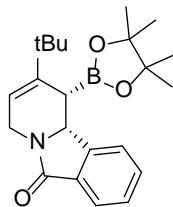

68 (syn)

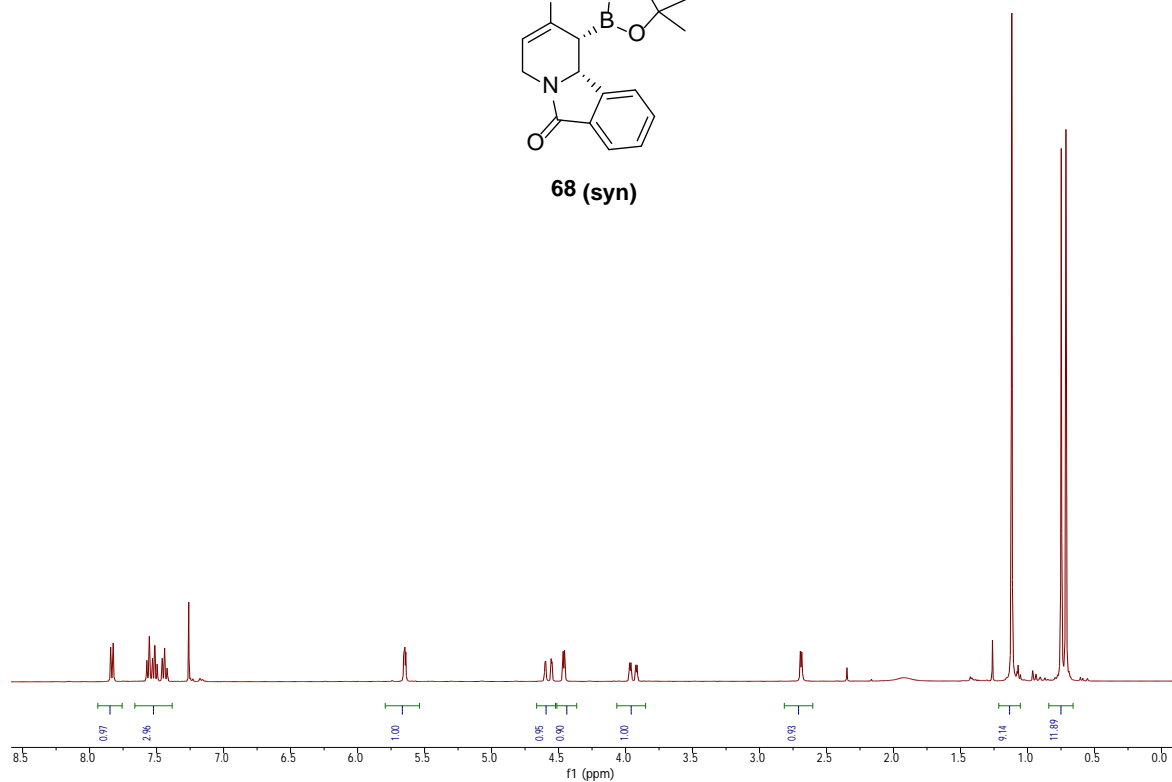

Carbon NMR

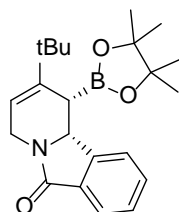

68 (syn)

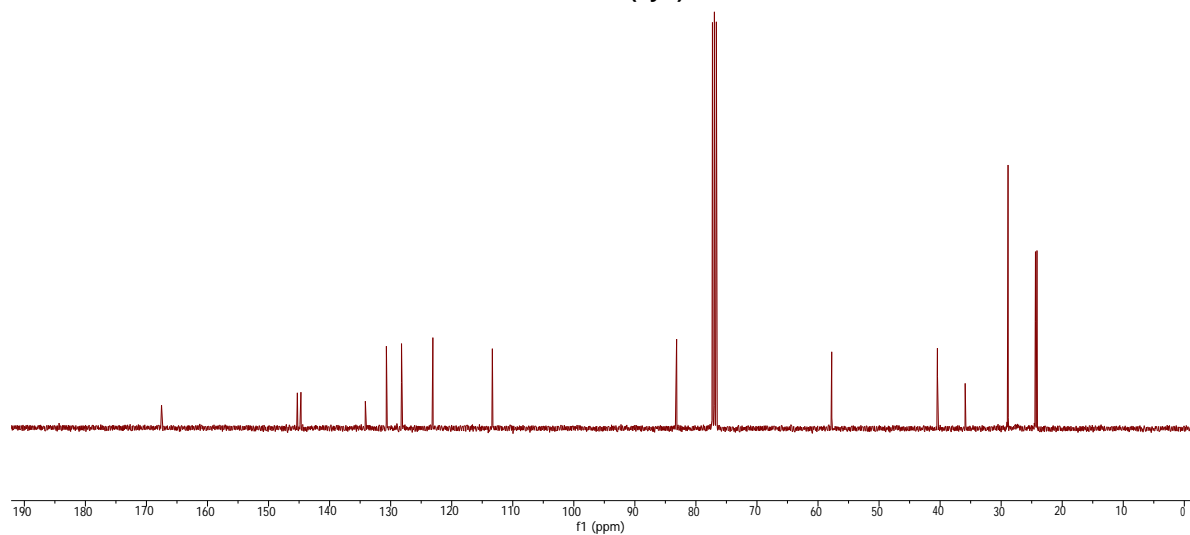

Proton NMR

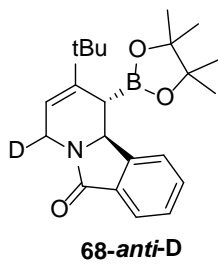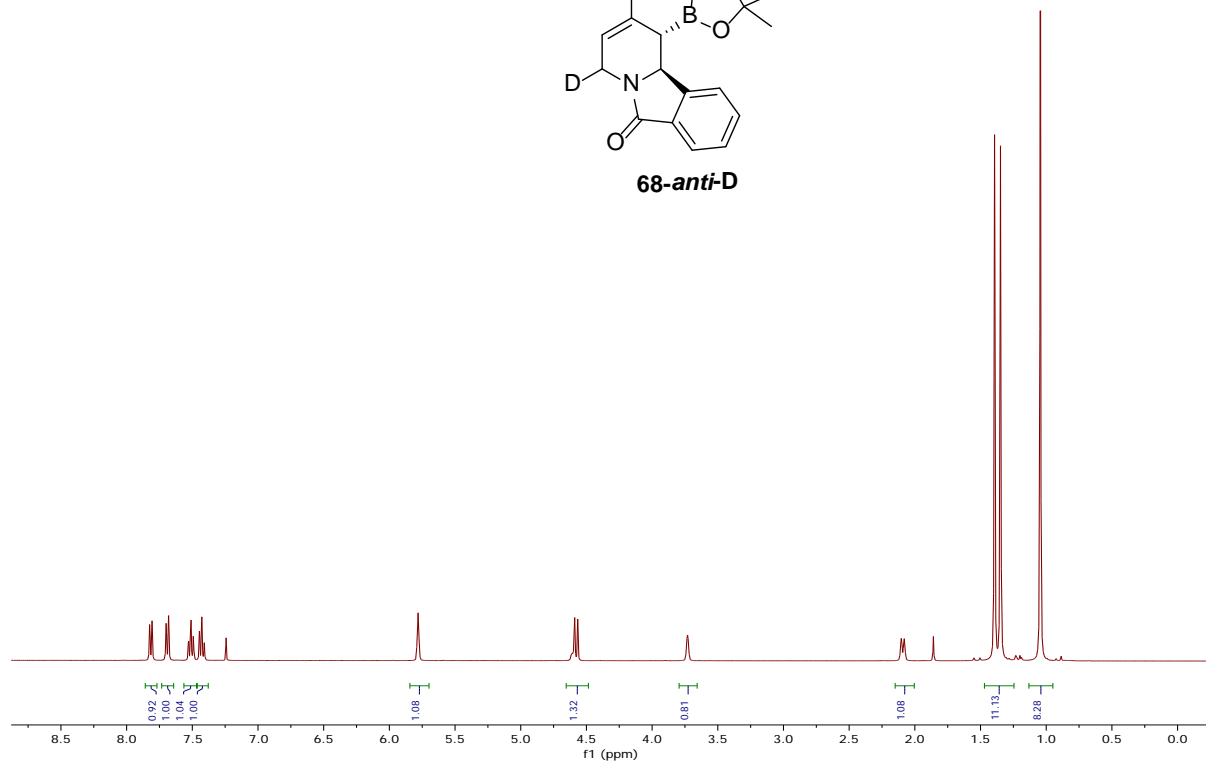

Carbon NMR

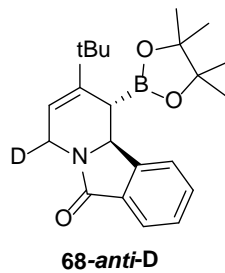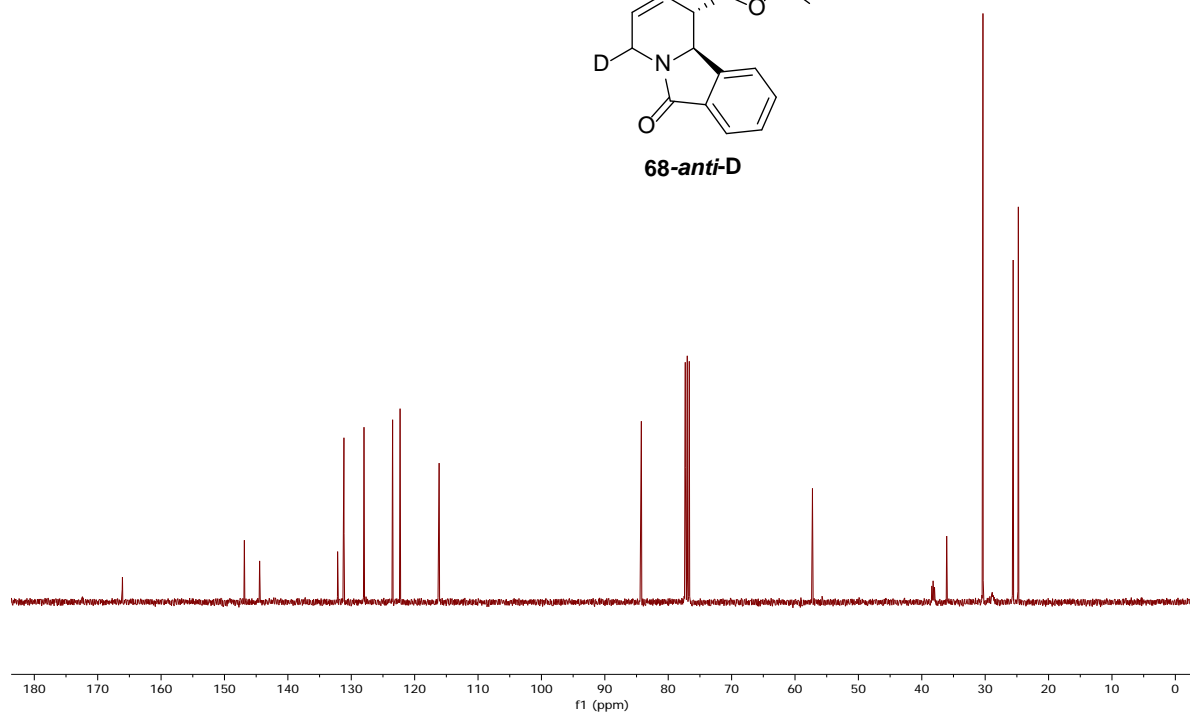

Proton NMR

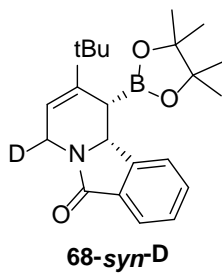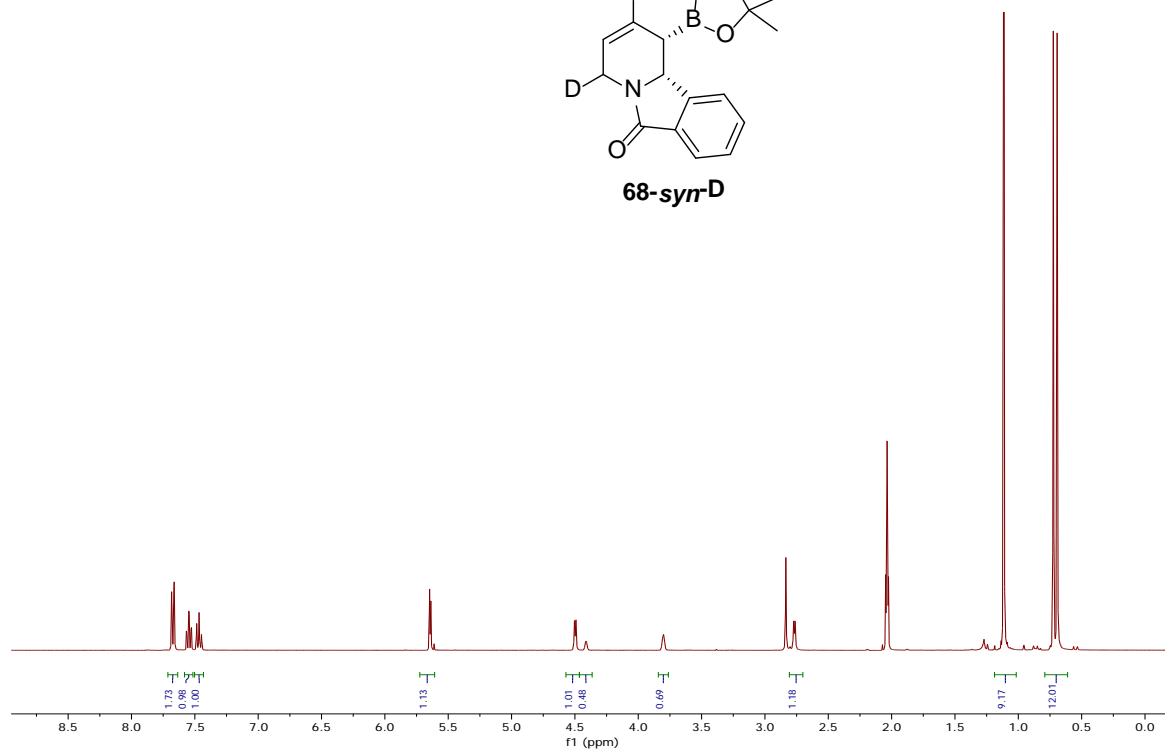

Carbon NMR

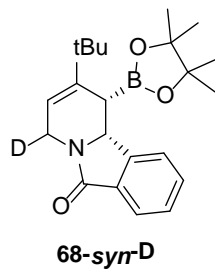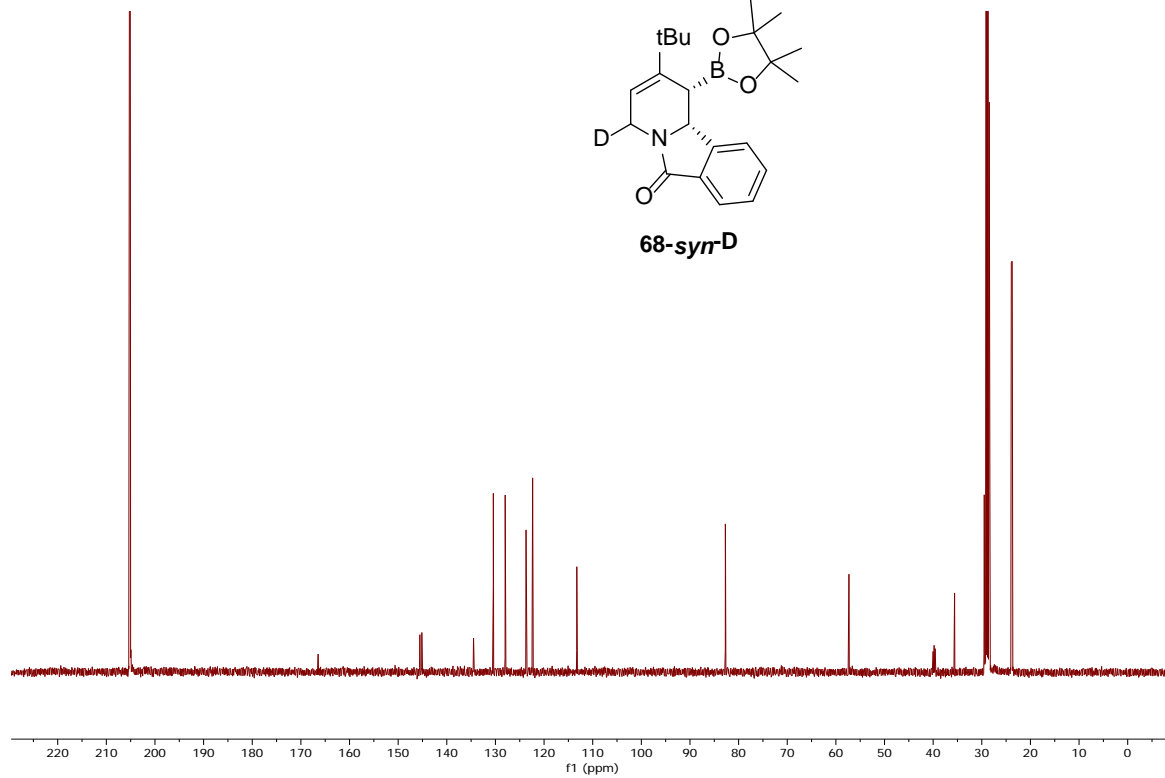

Proton NMR

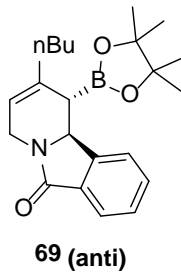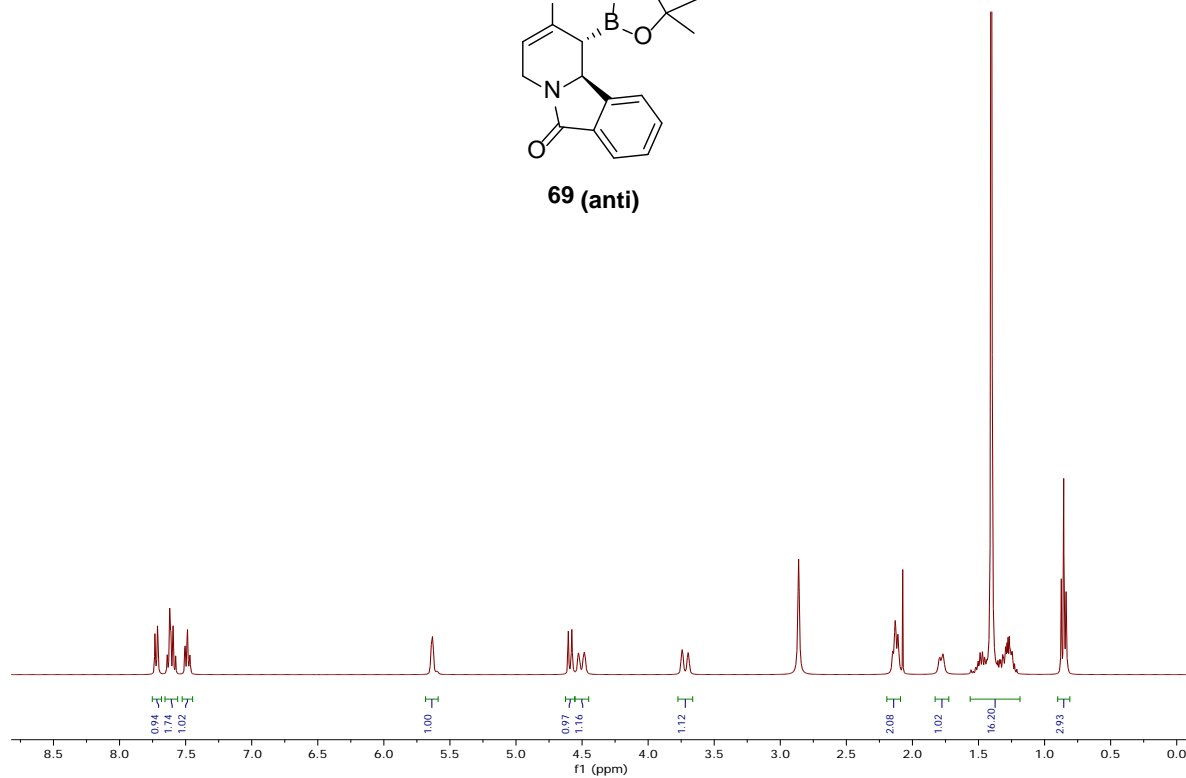

Carbon NMR

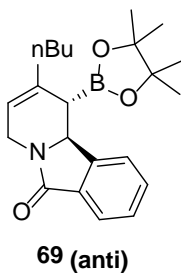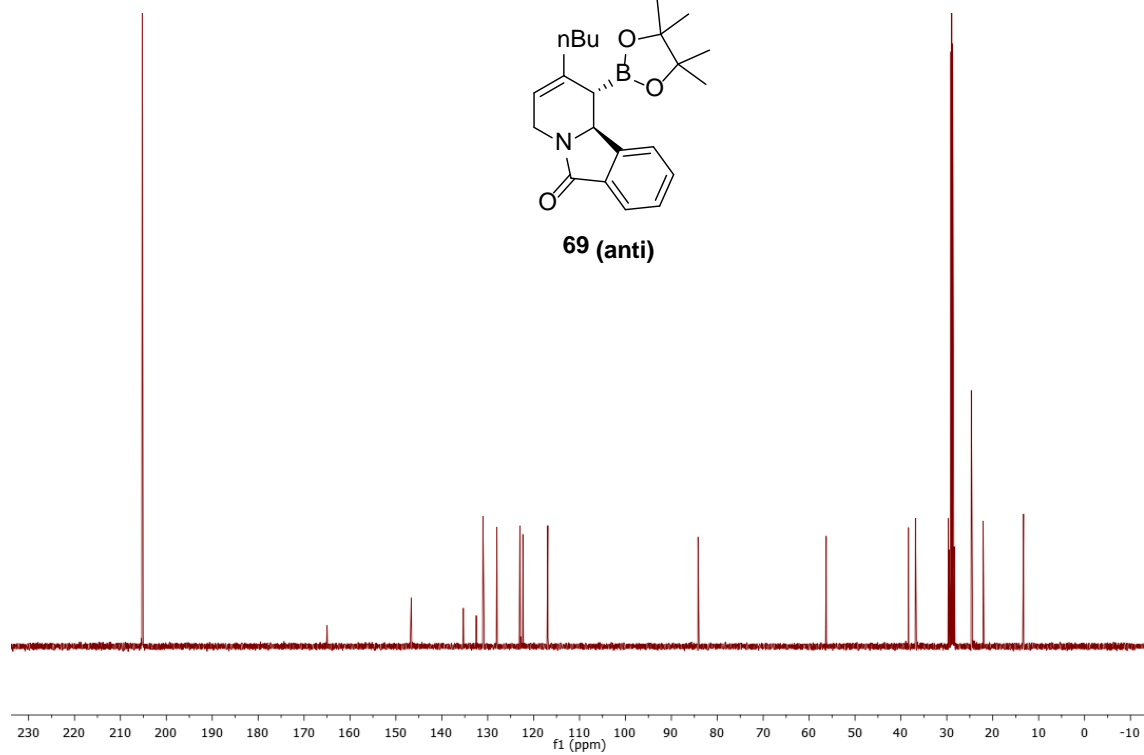

Proton NMR

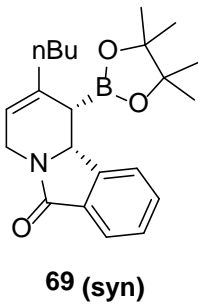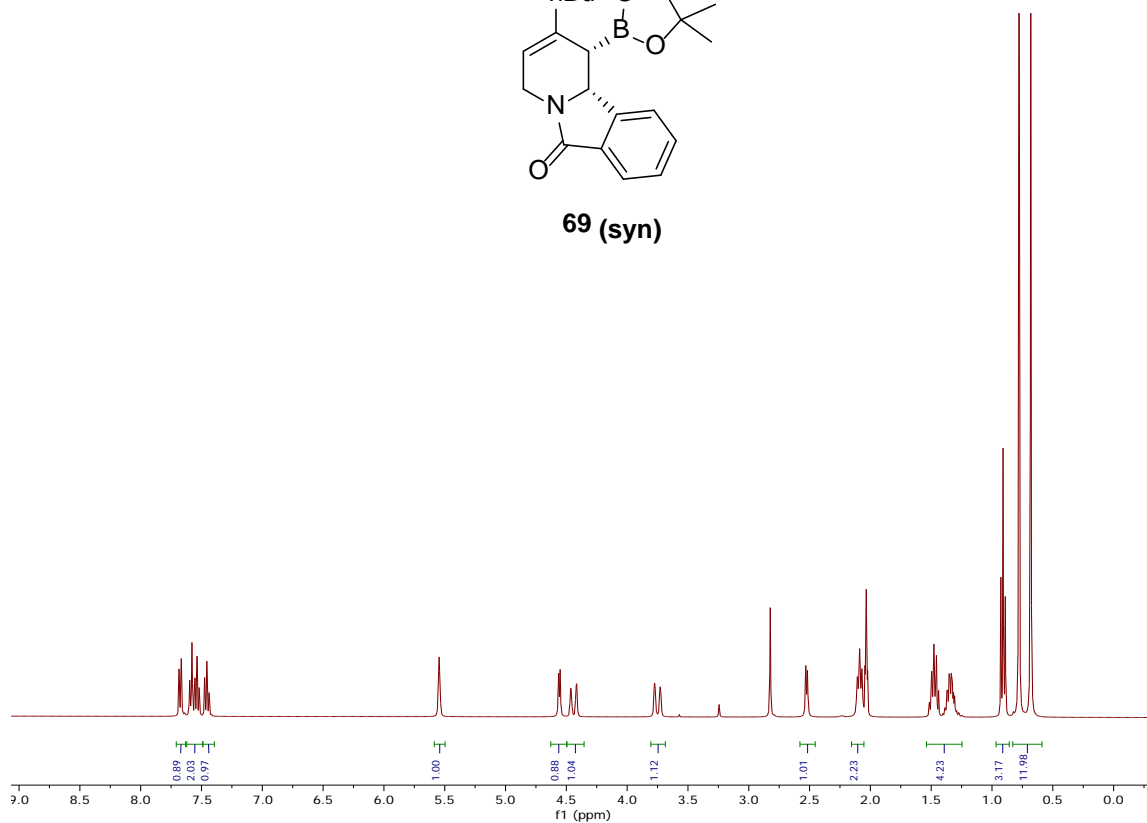

Carbon NMR

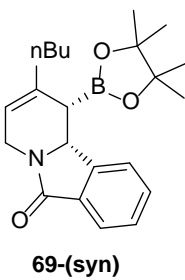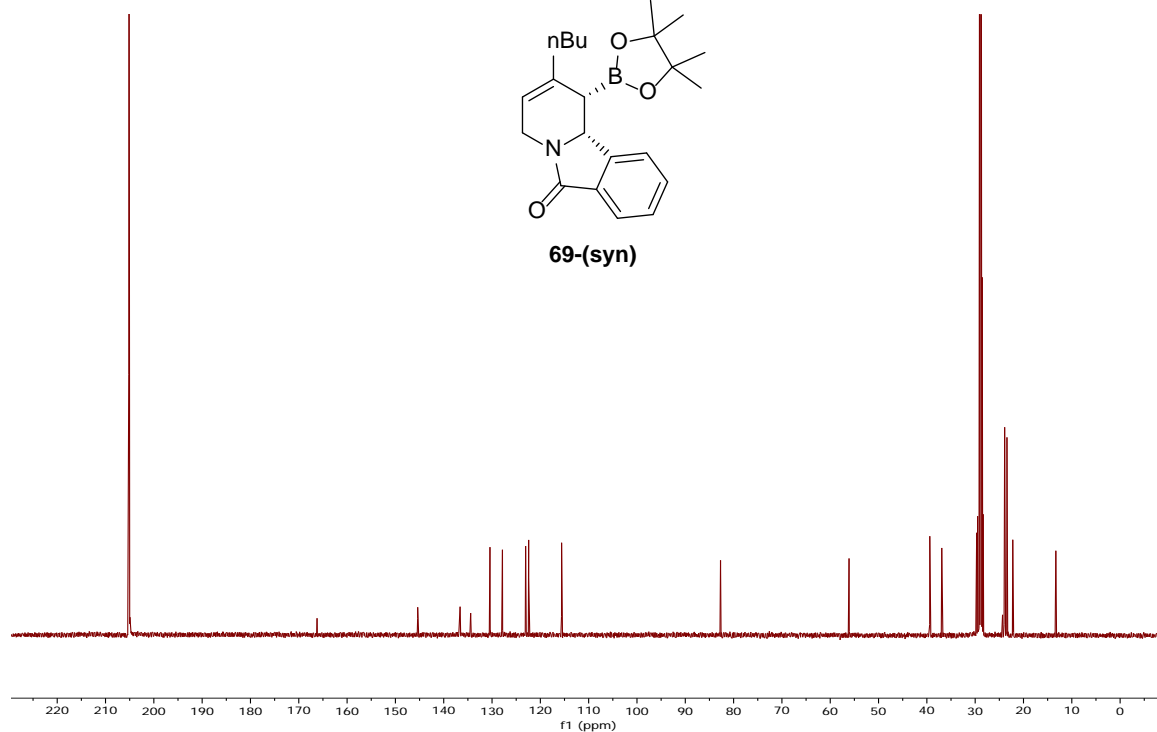



Proton NMR

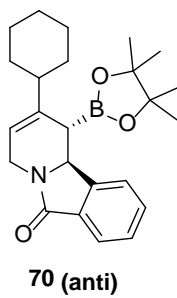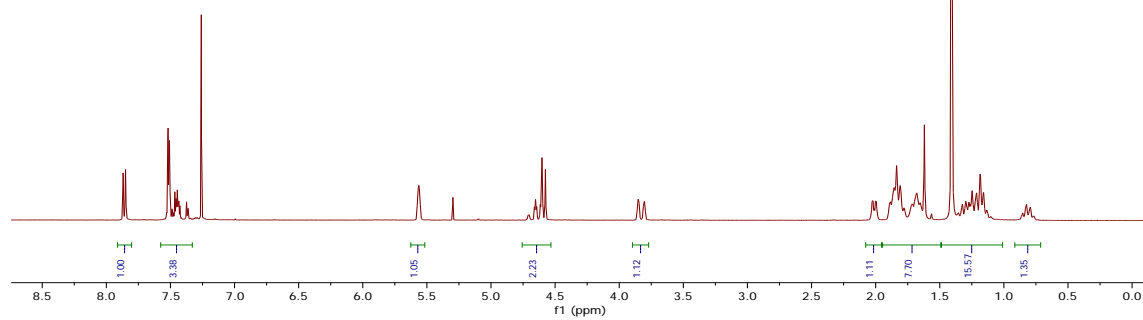

Carbon NMR

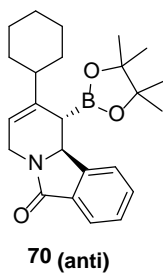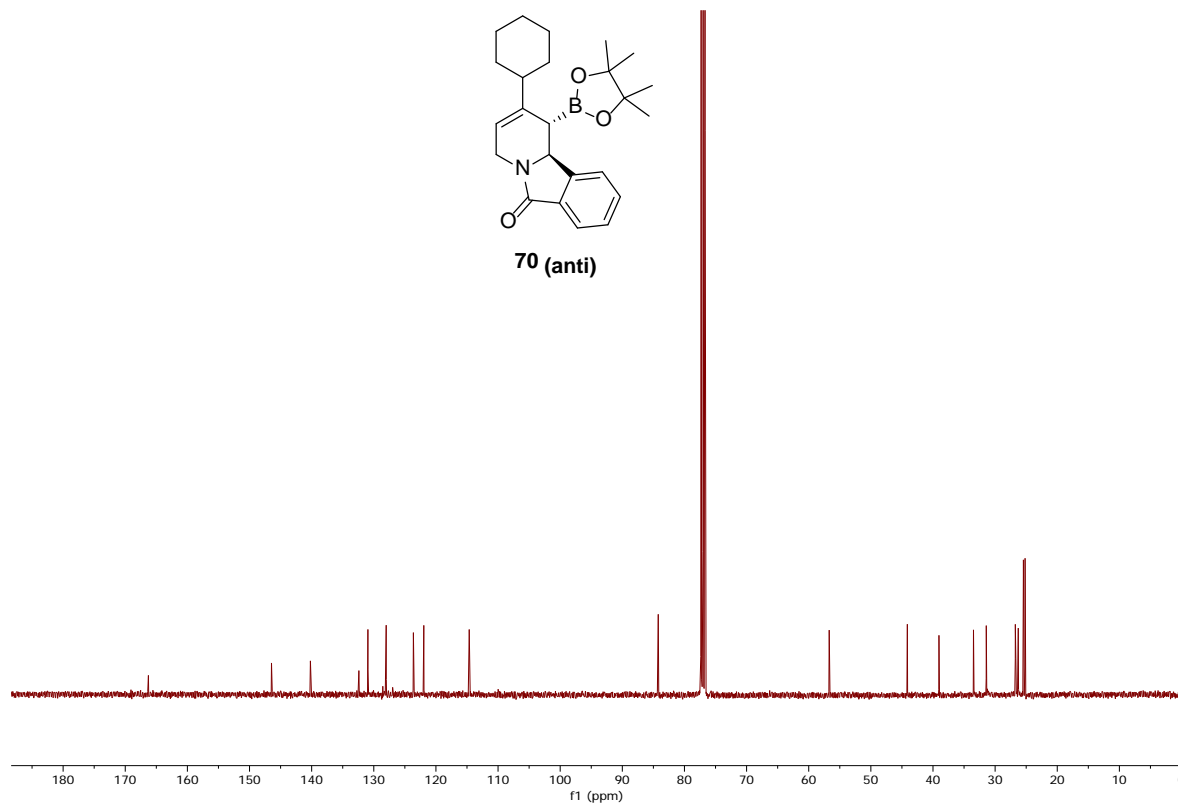

Proton NMR

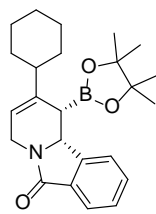

**70 (syn)**

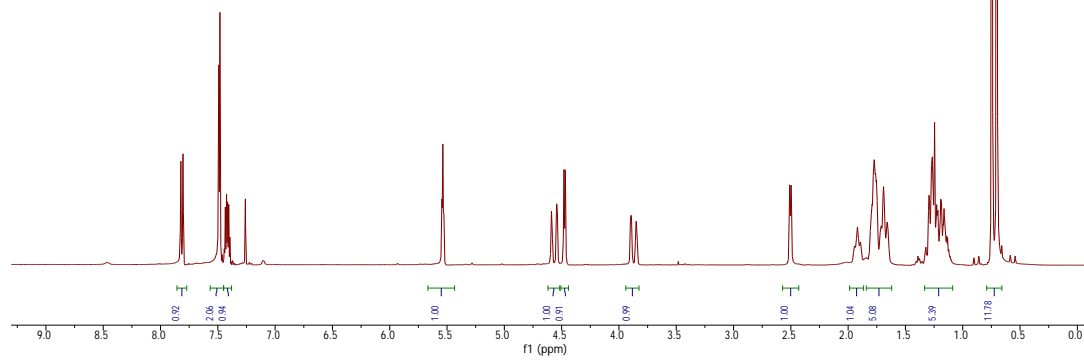

Carbon NMR

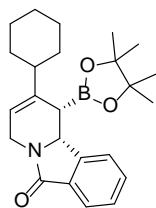

**70 (syn)**

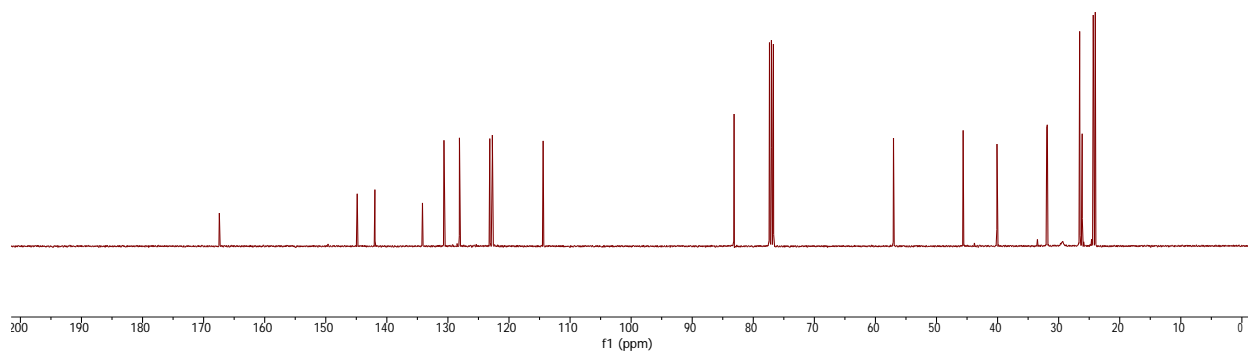

Proton NMR

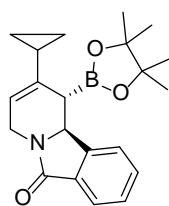

71 (anti)

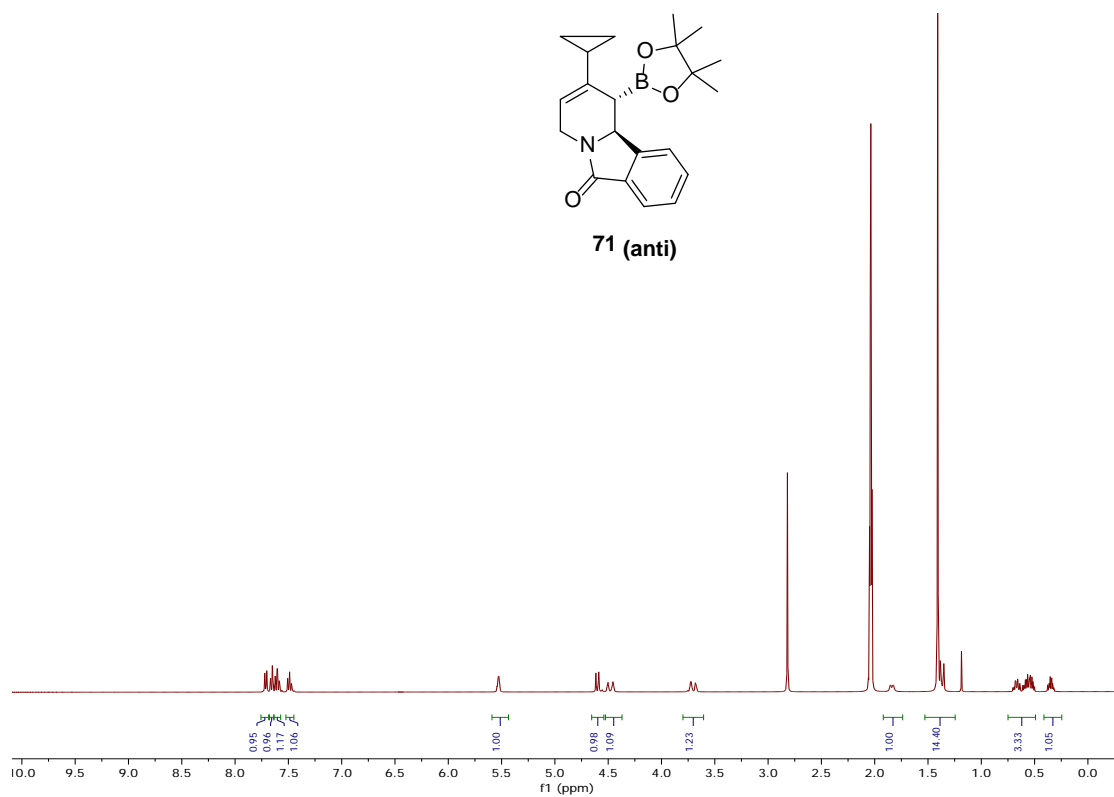

Carbon NMR

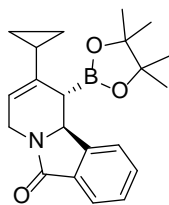

71 (anti)

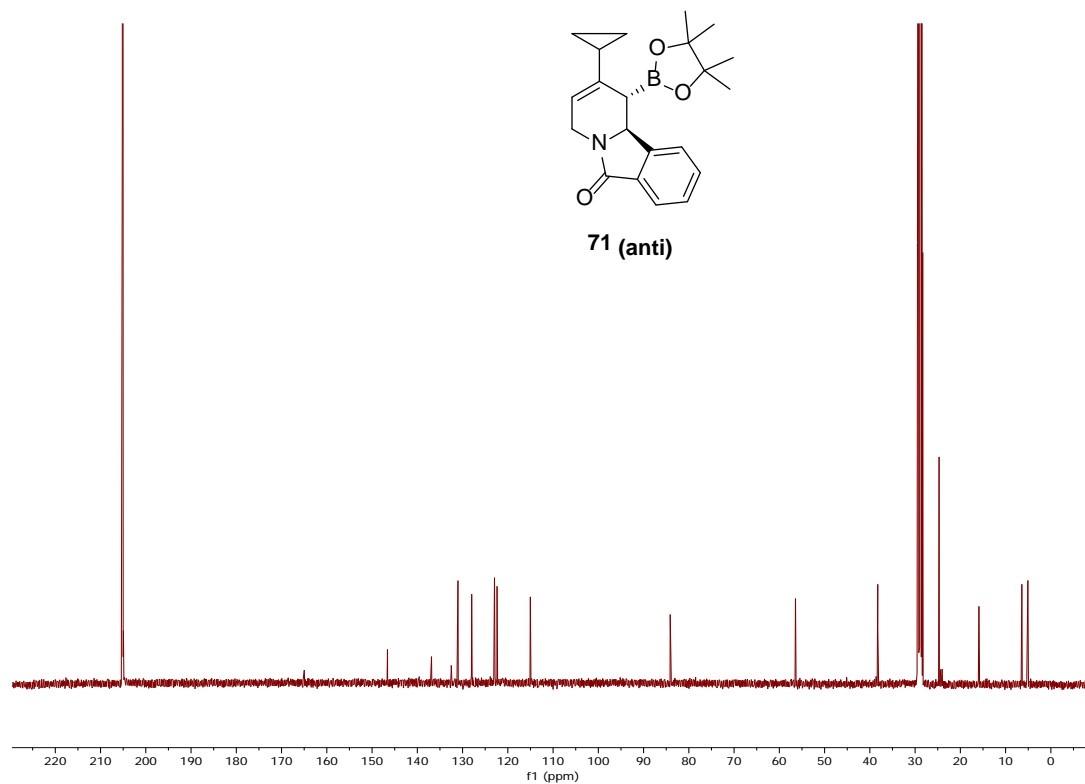

Proton NMR

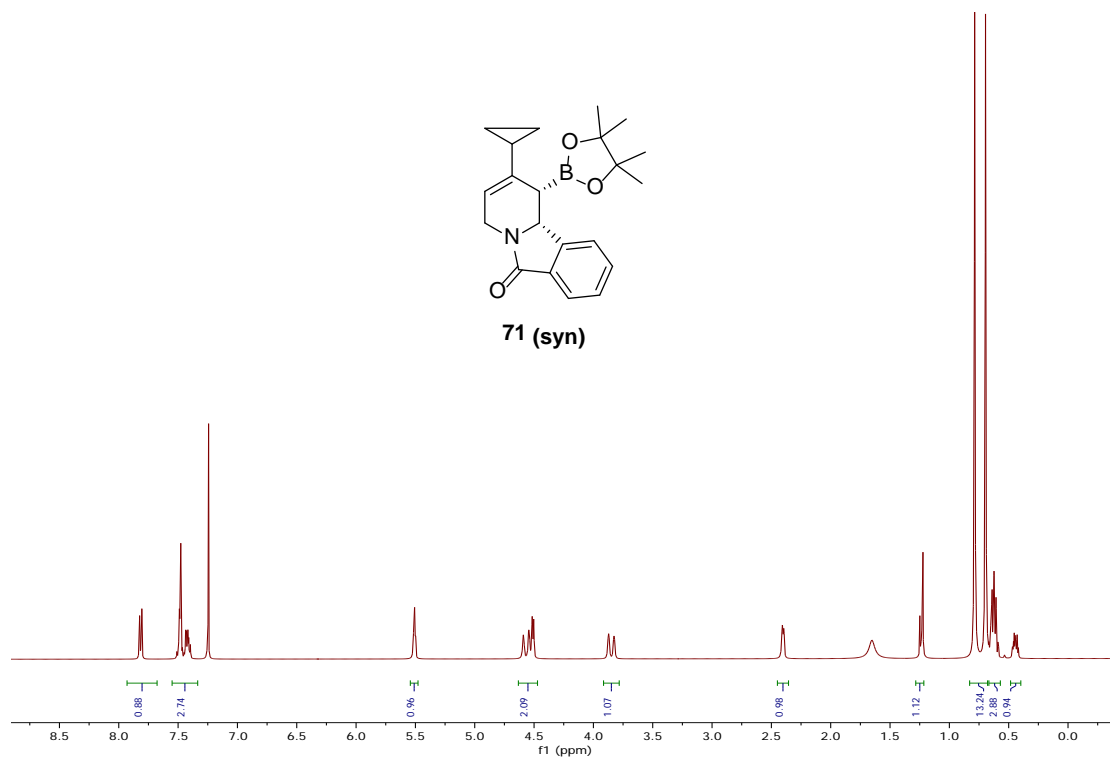

Carbon NMR

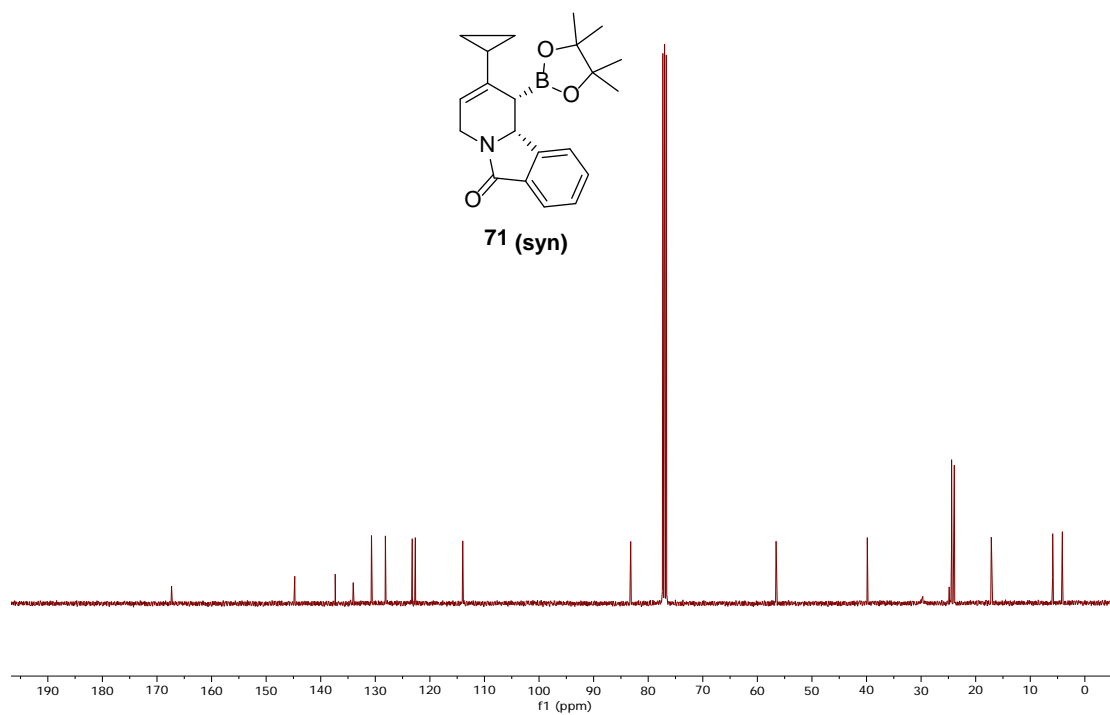

Proton NMR

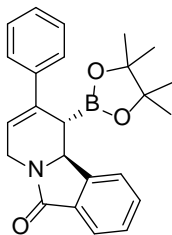

72 (anti)

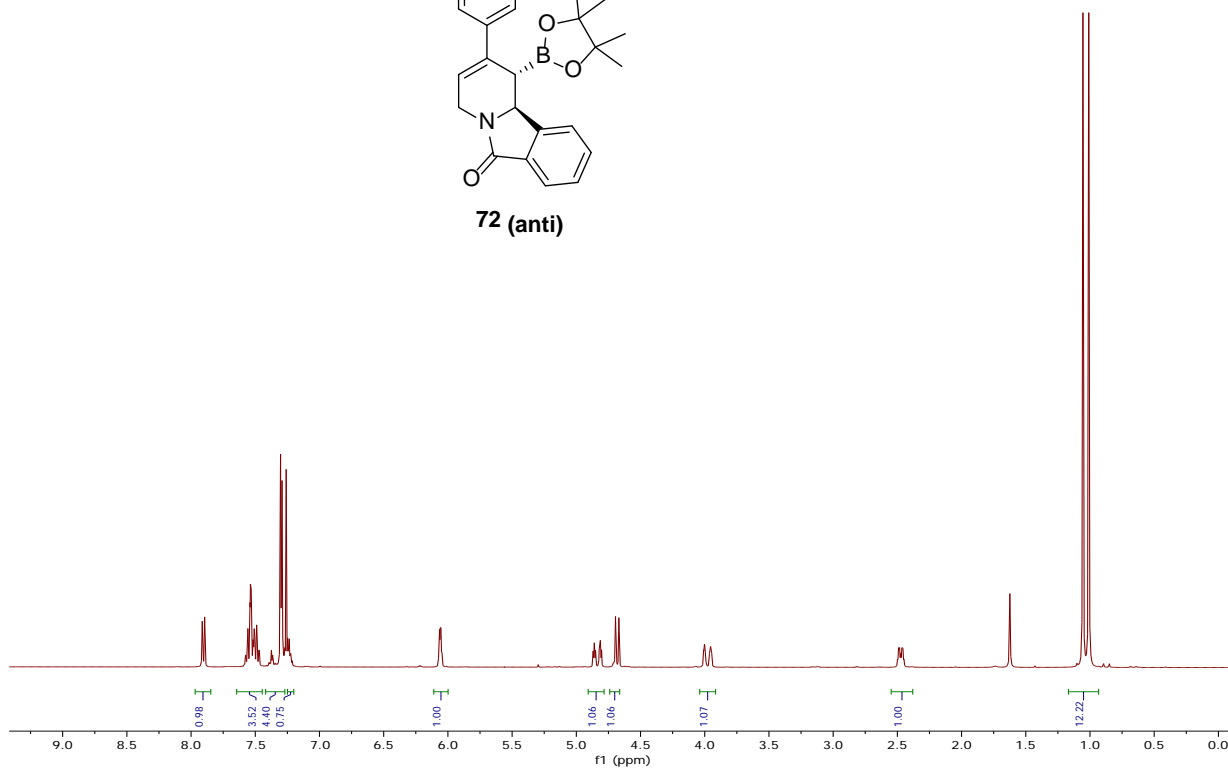

Carbon NMR

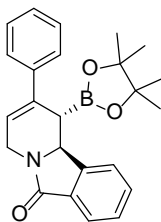

72 (anti)

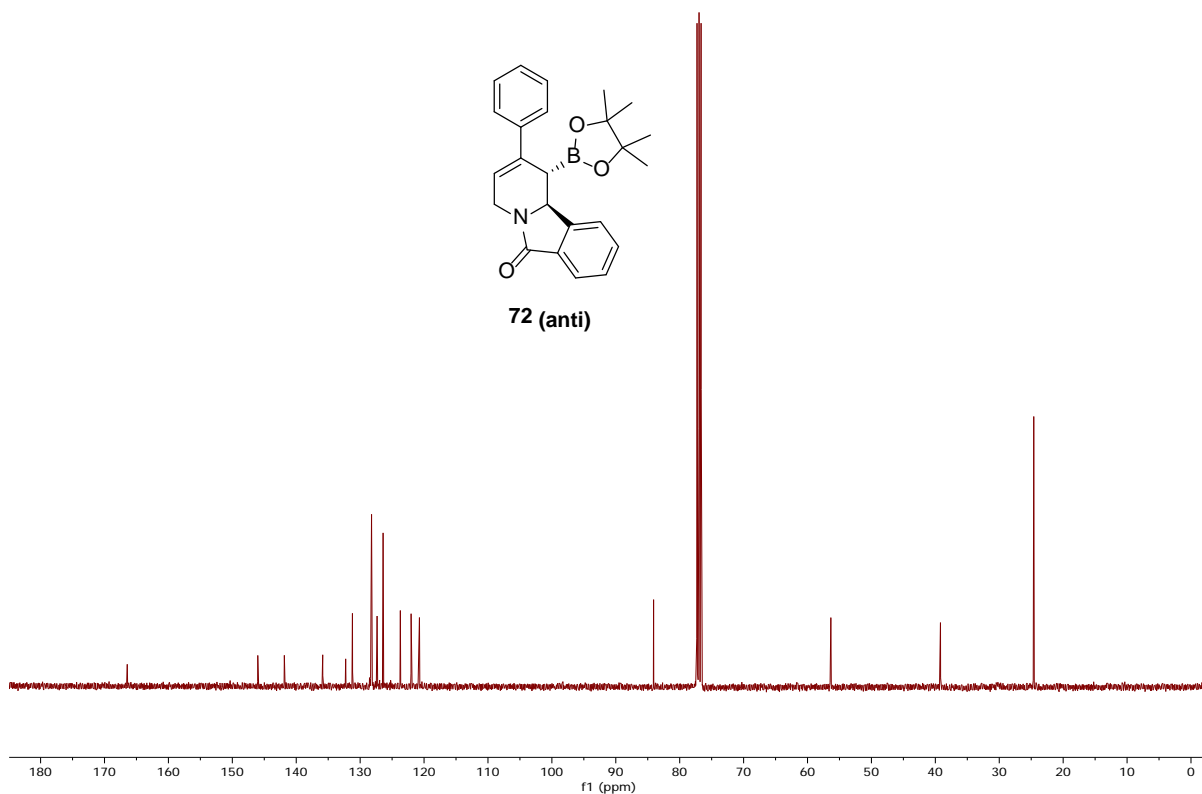

Proton NMR

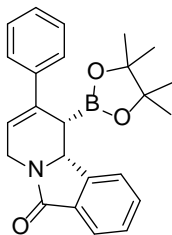

72 (syn)

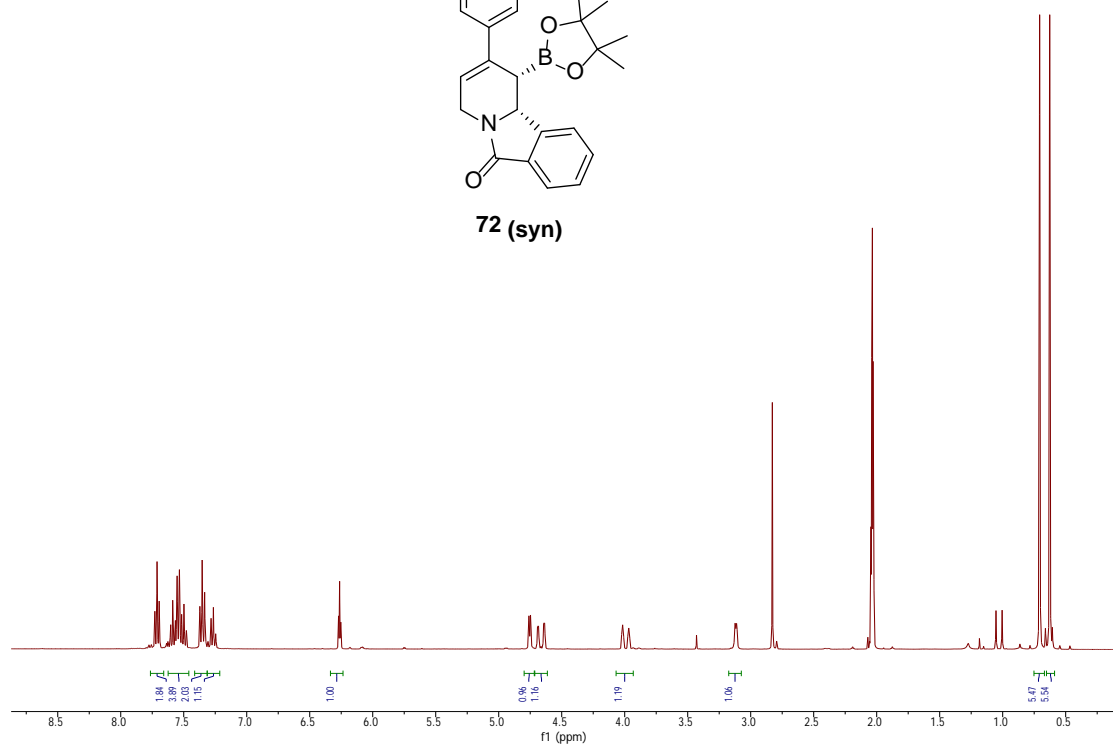

Carbon NMR

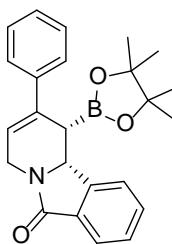

72 (syn)

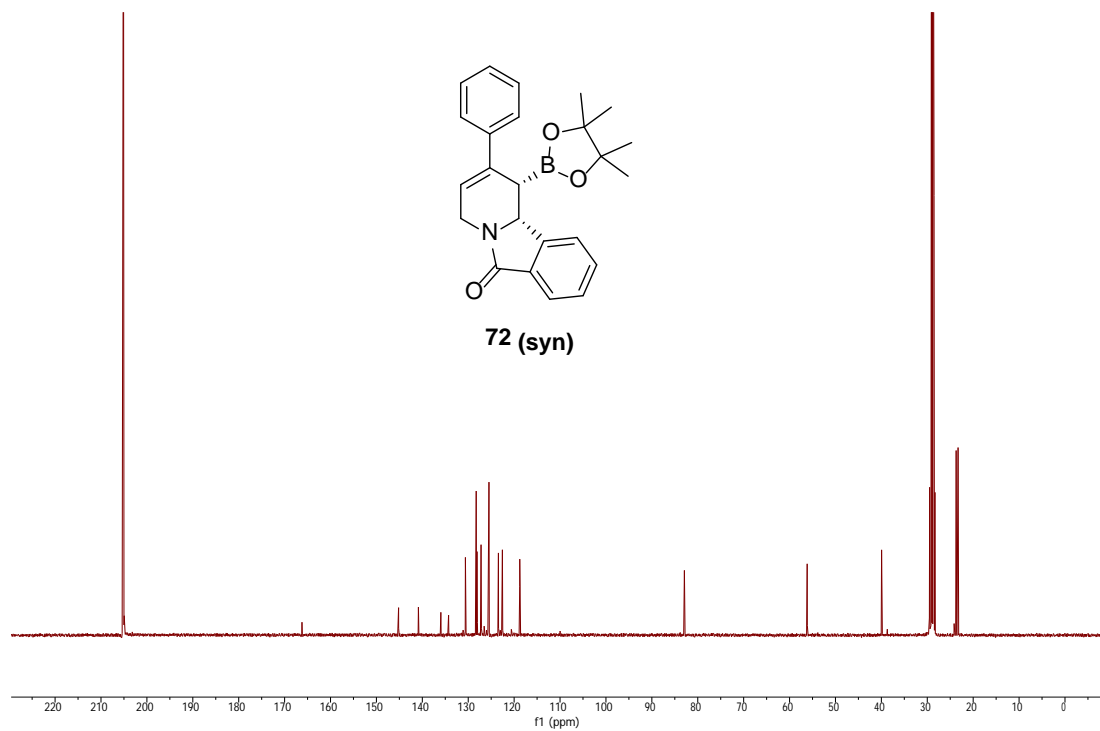

# Proton NMR

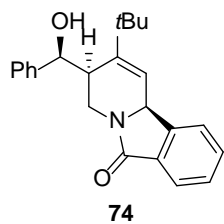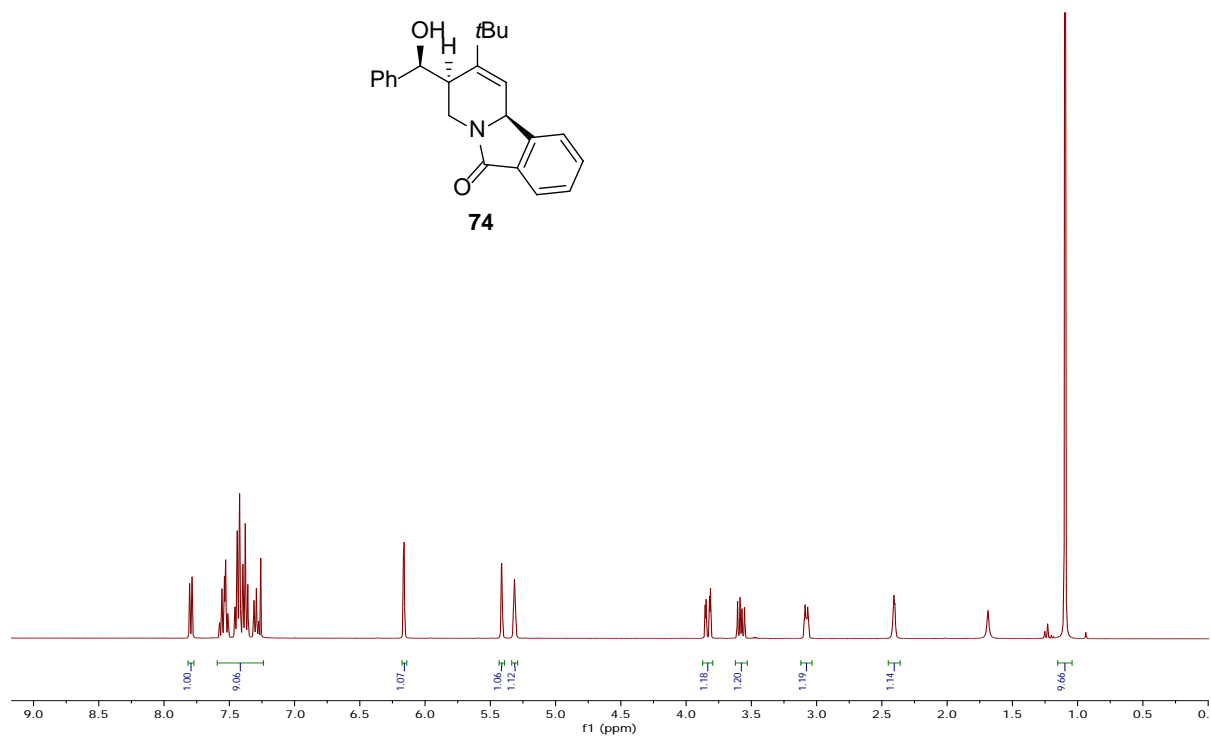

# Carbon NMR

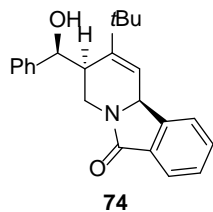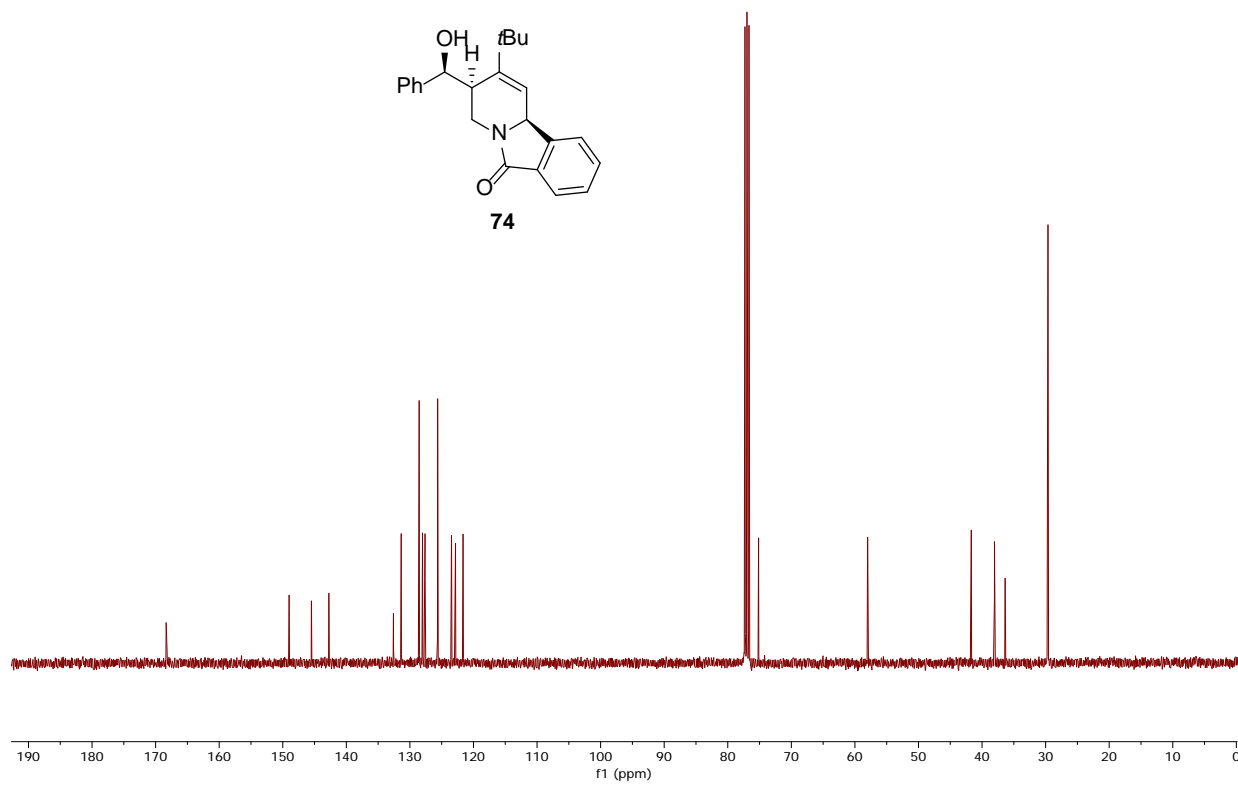

# Proton NMR

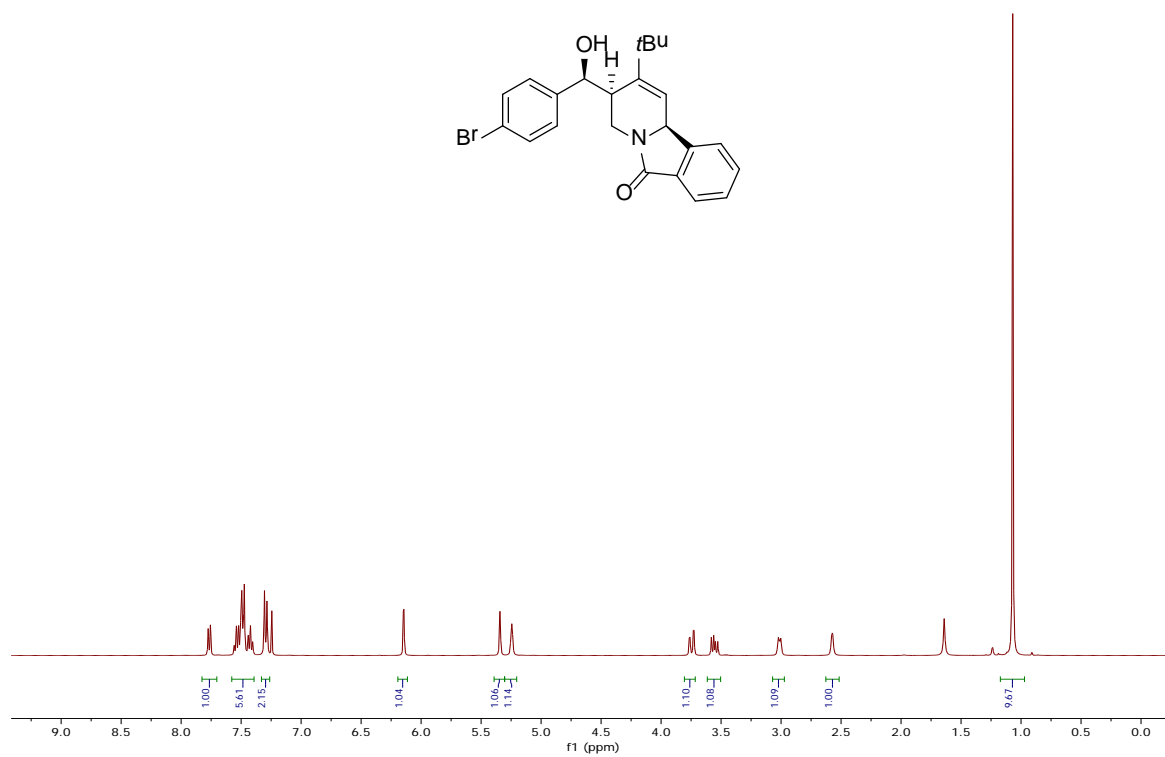

# Carbon NMR

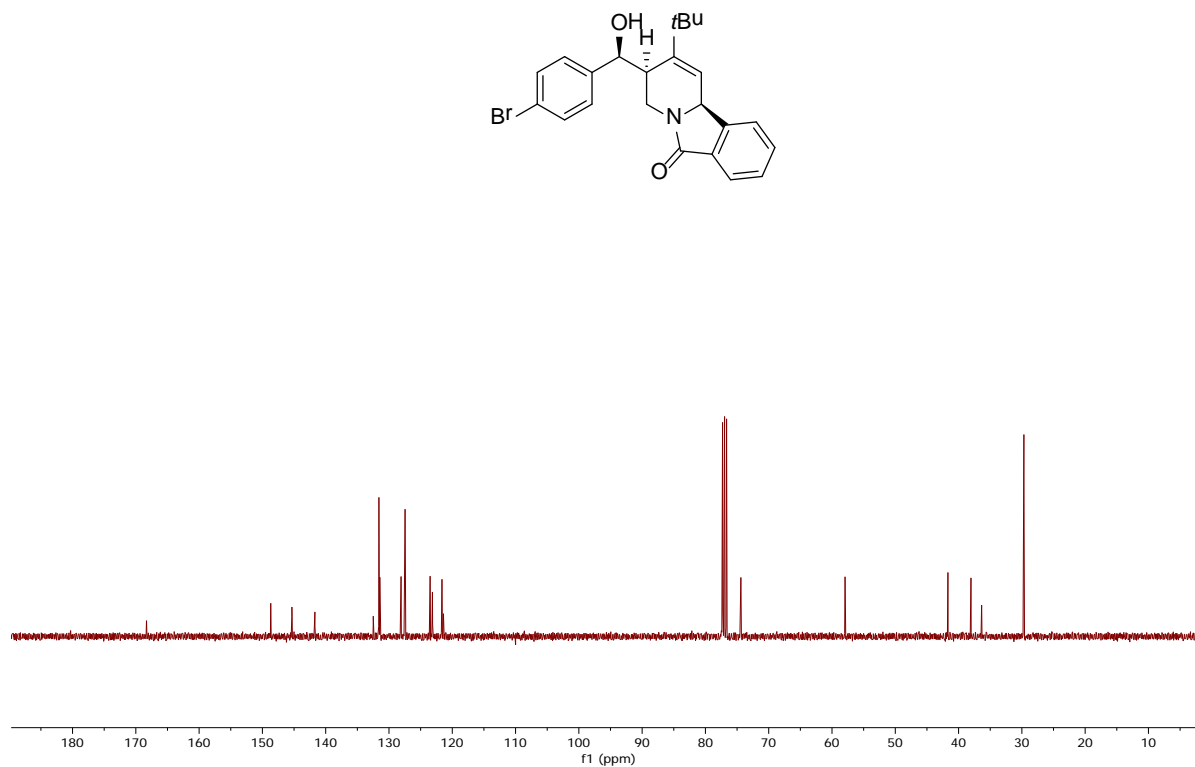



# Proton NMR

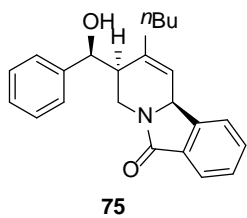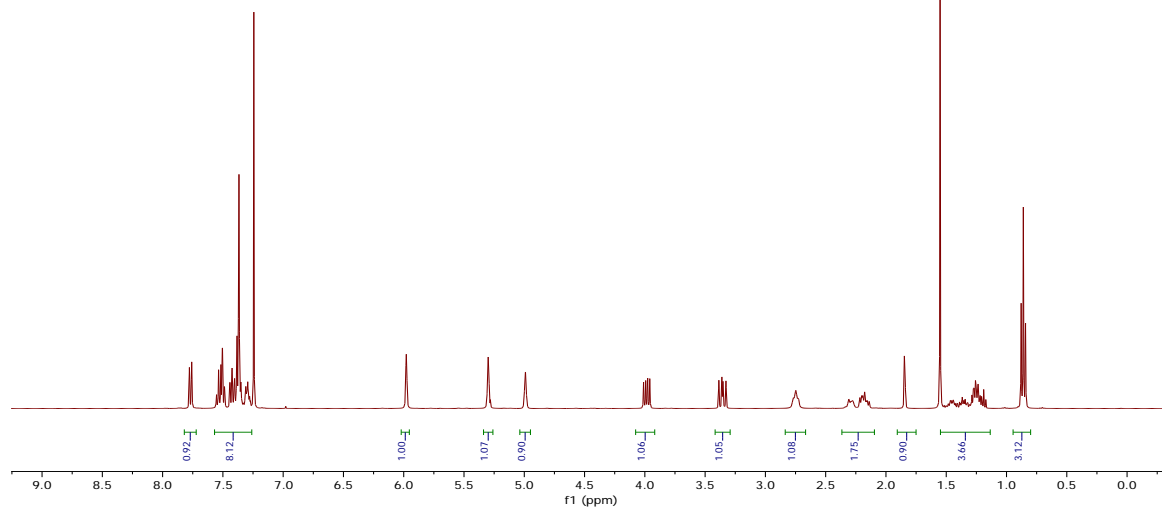

# Carbon NMR

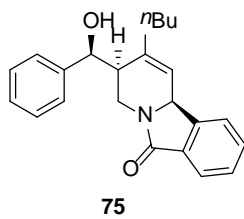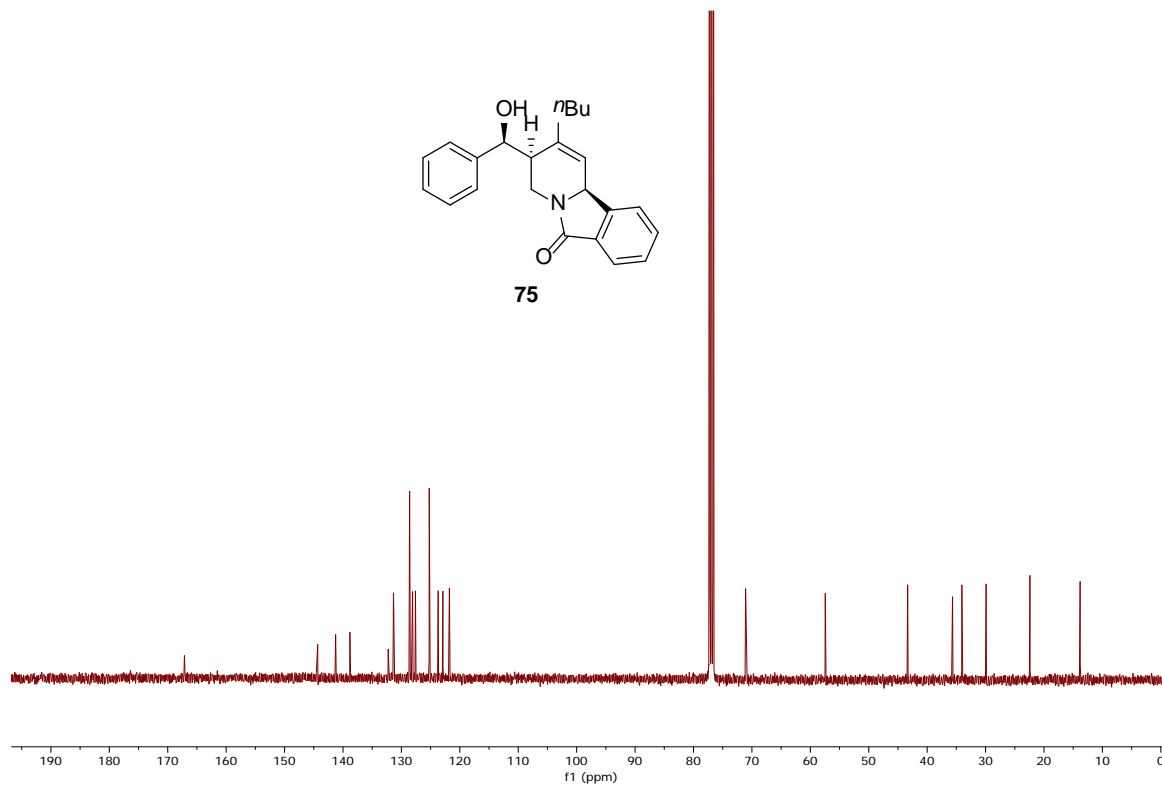

# Proton NMR

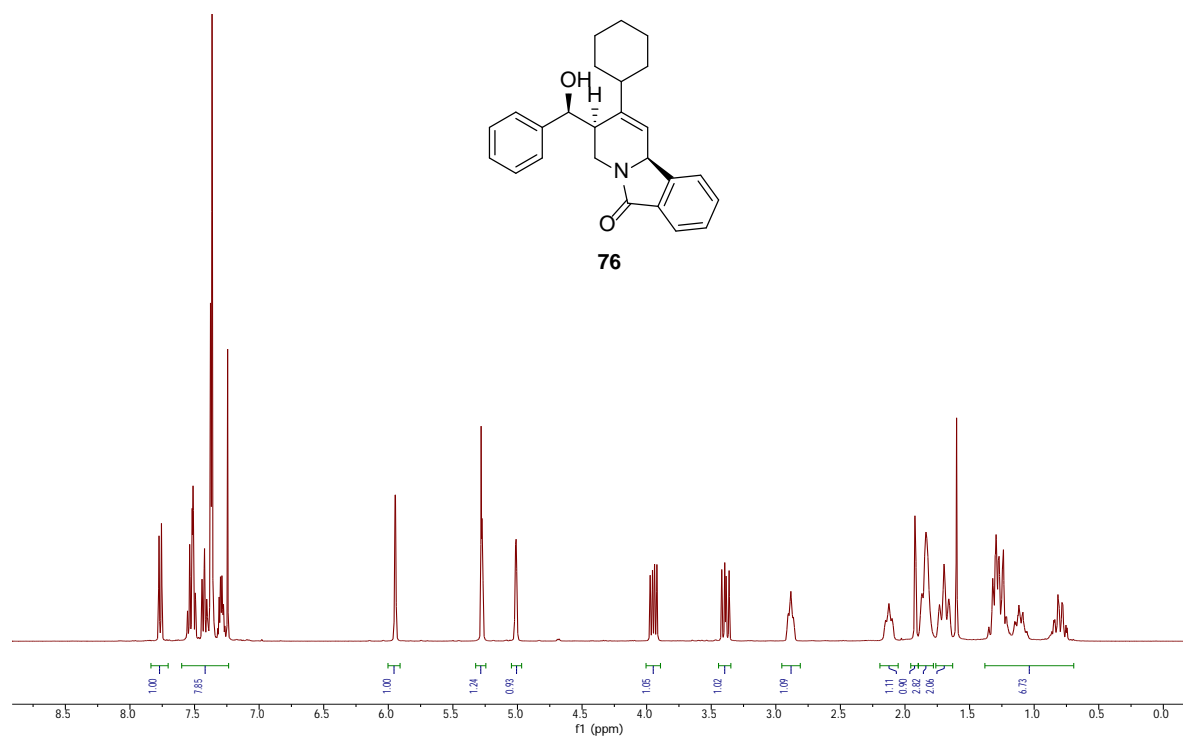

# Carbon NMR

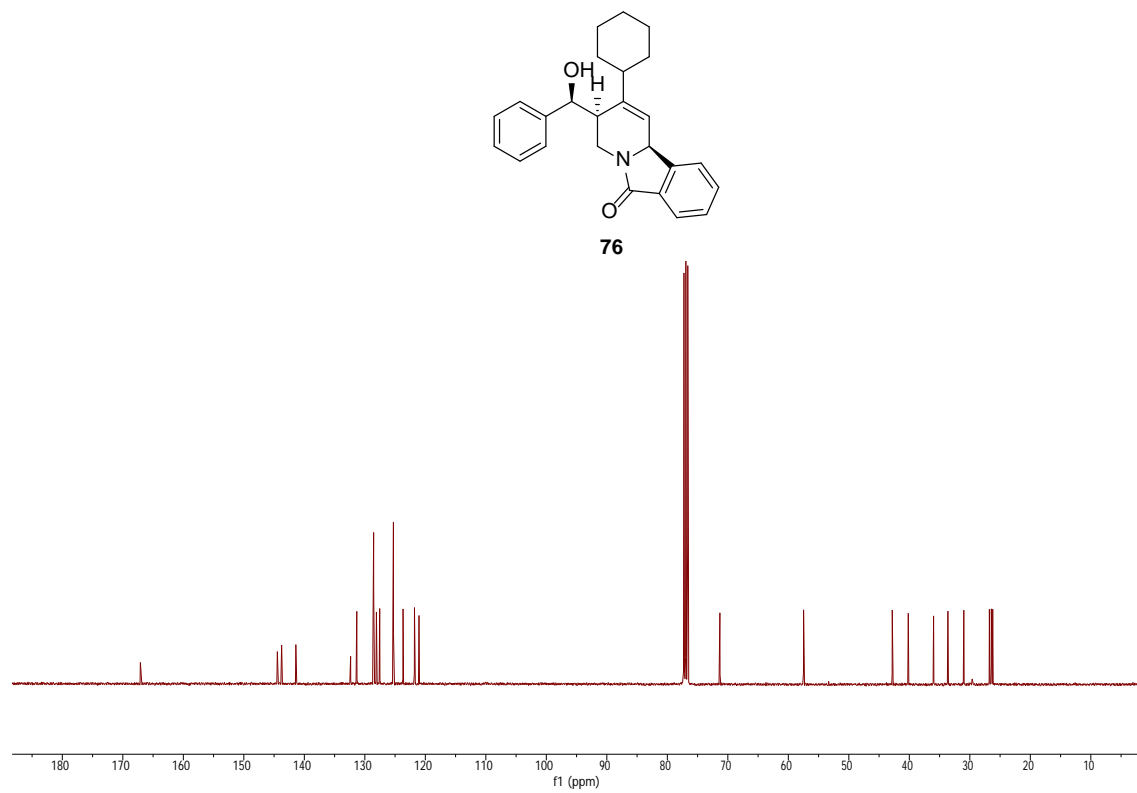

# Proton NMR

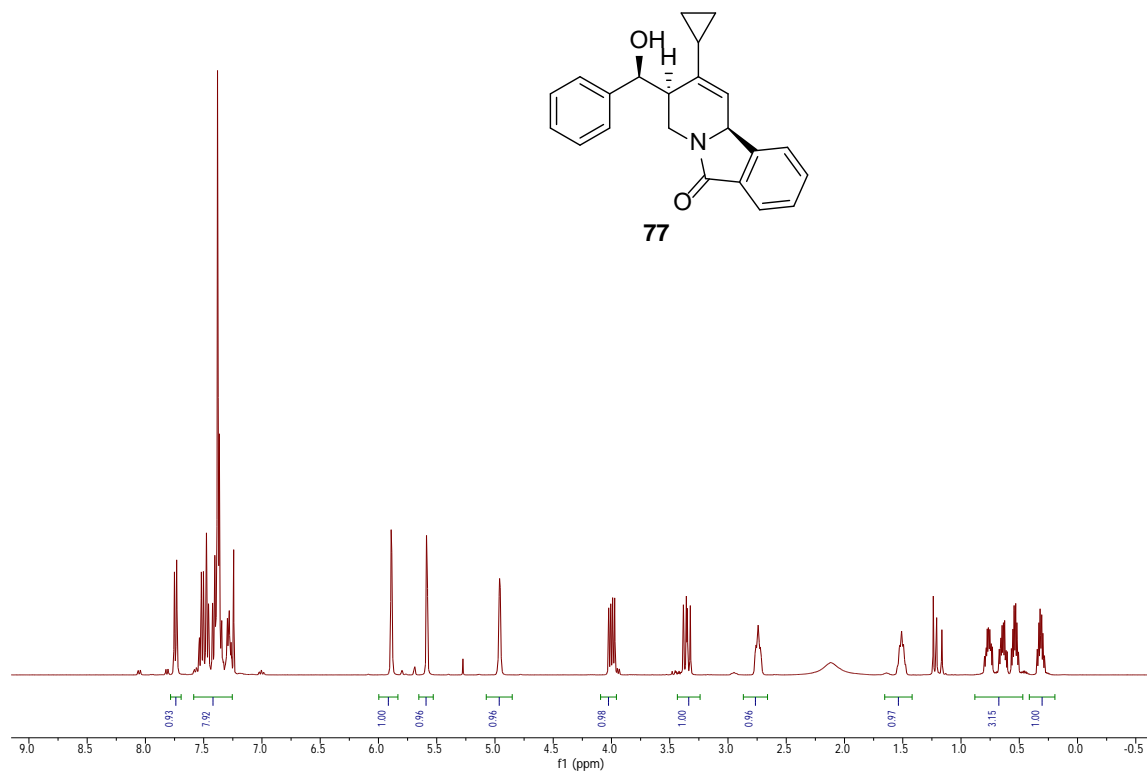

# Carbon NMR

CARBON\_U1

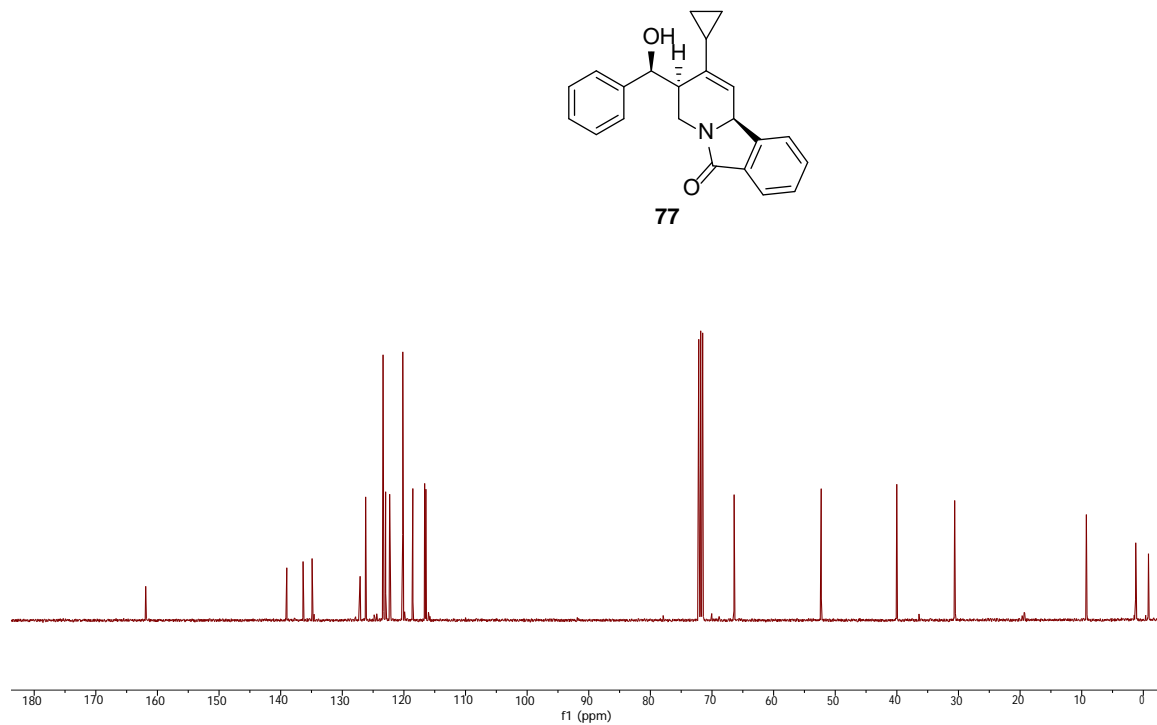

# Proton NMR

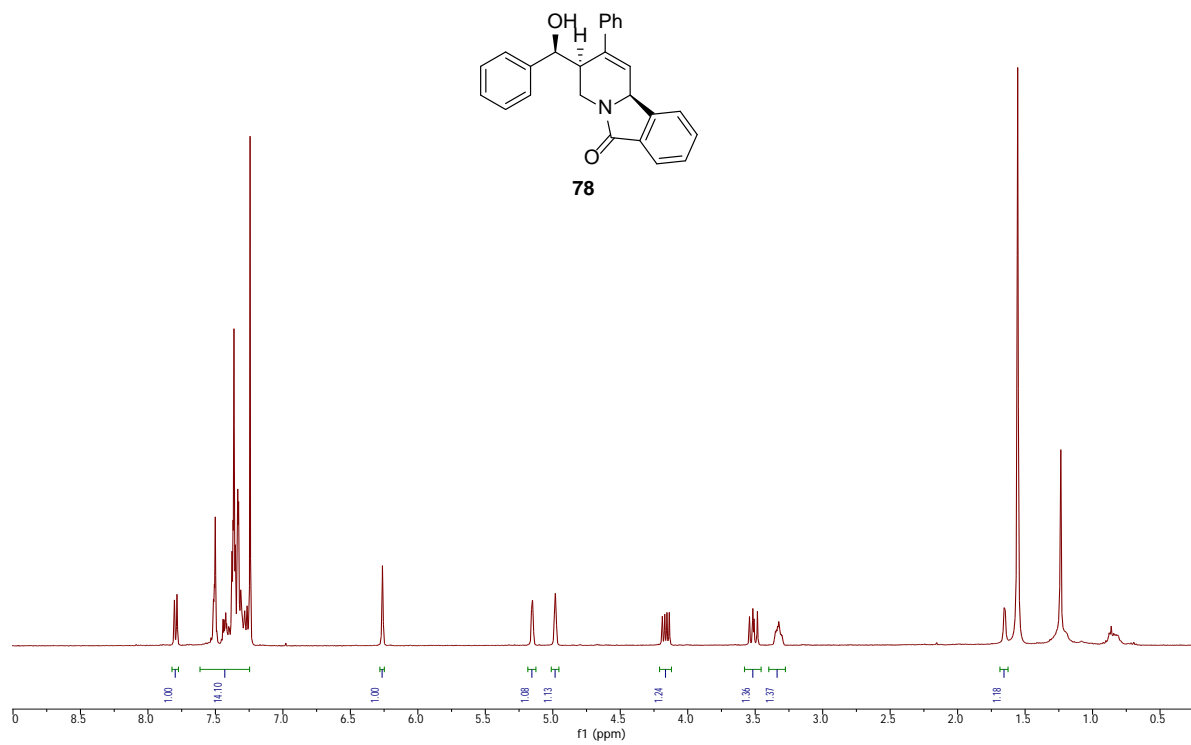

# Carbon NMR

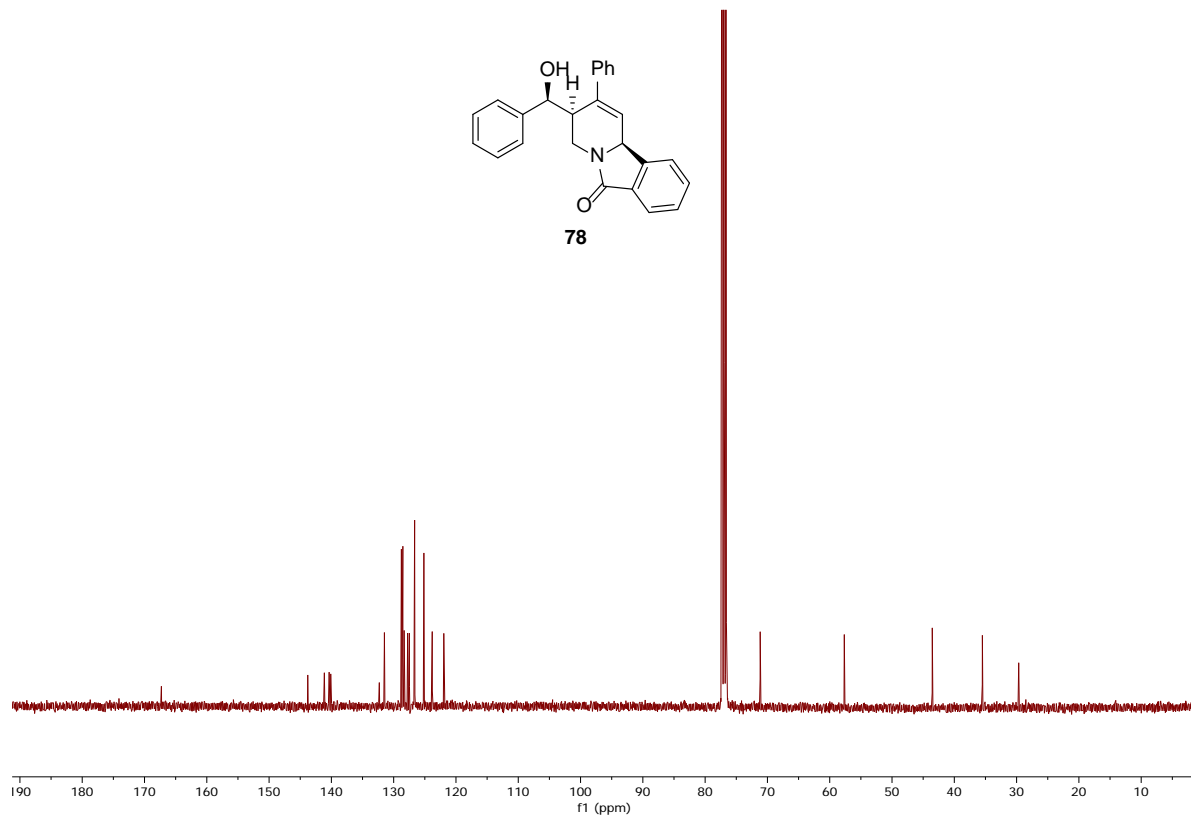

Proton NMR

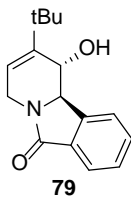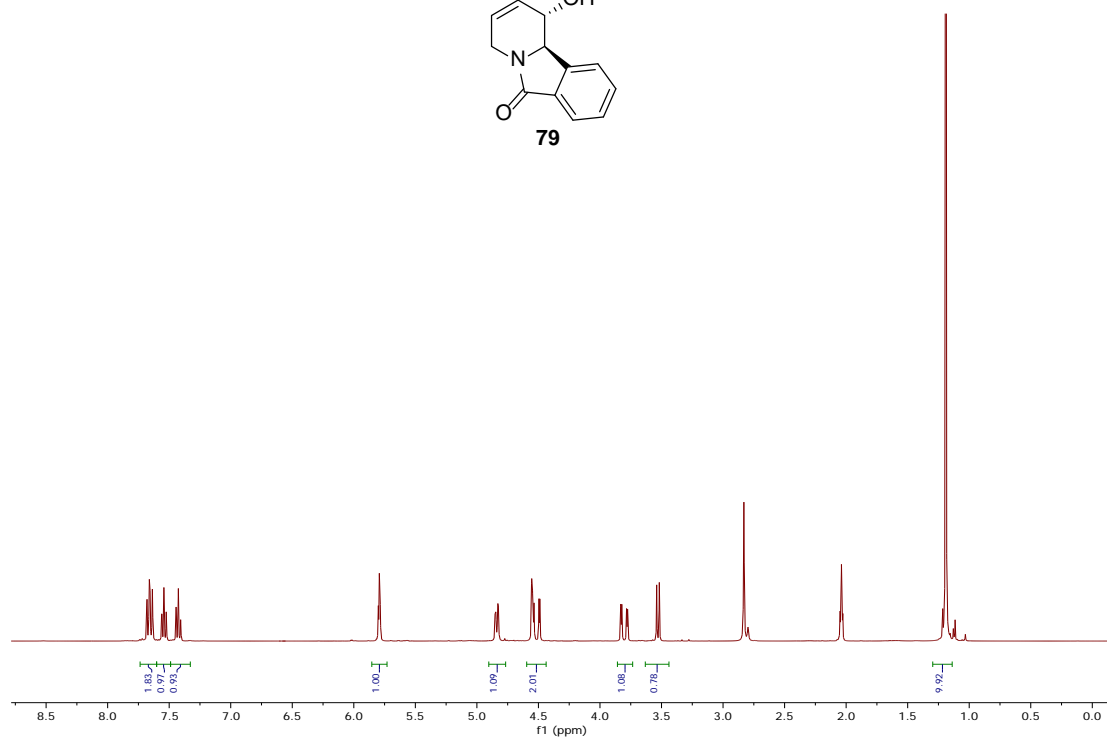

Carbon NMR

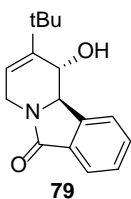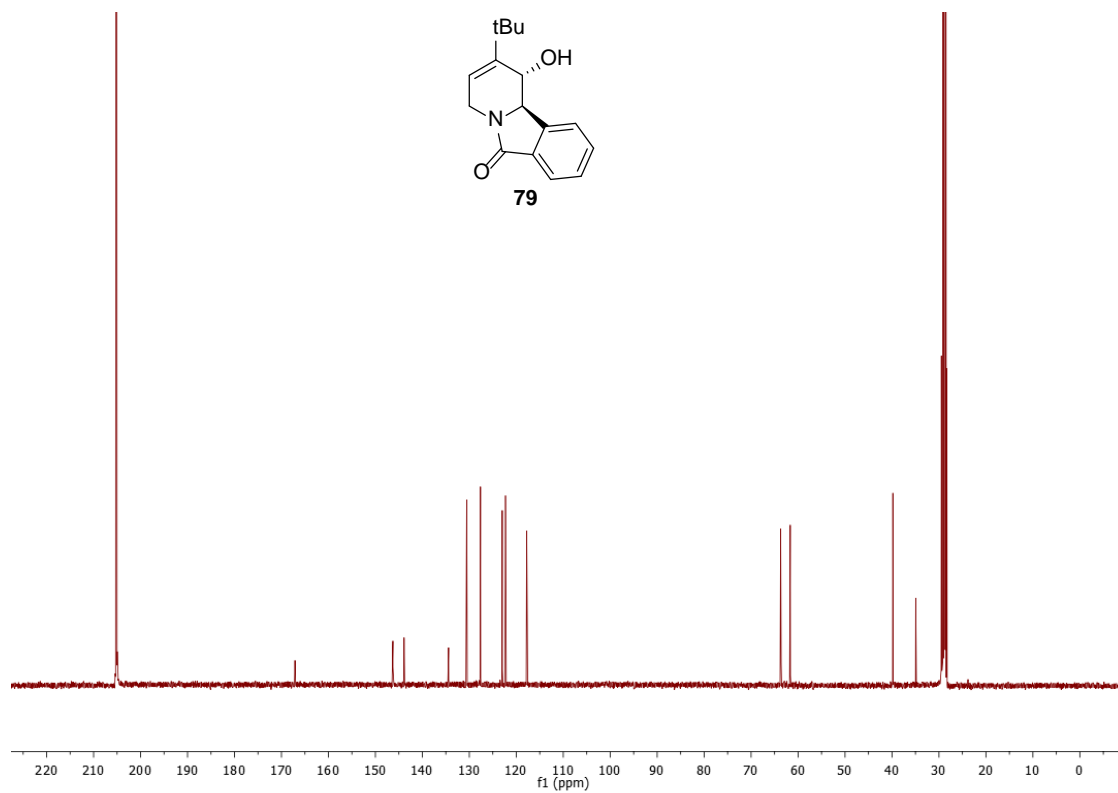

Proton NMR

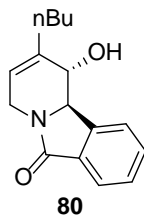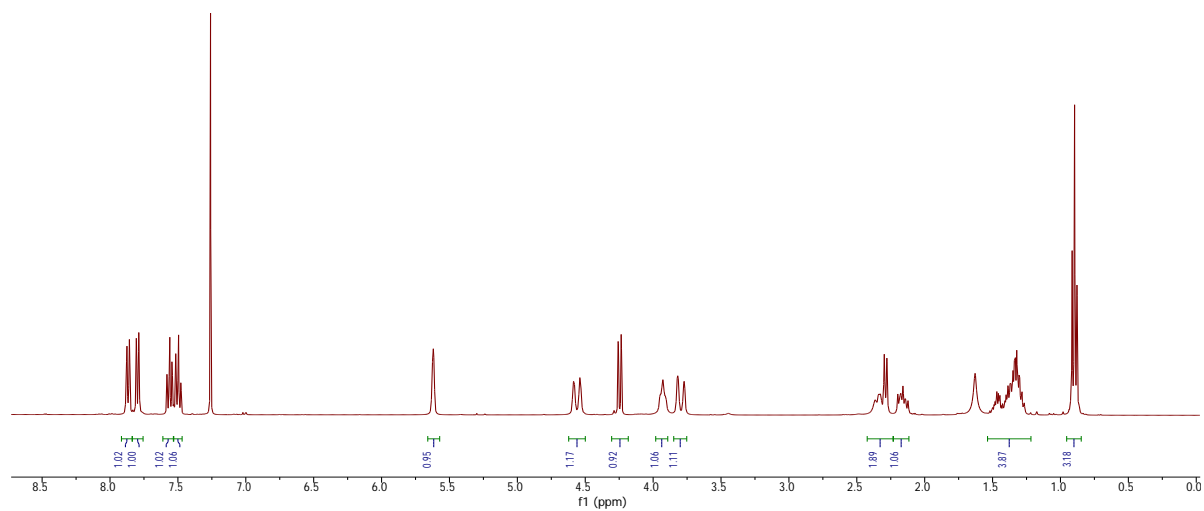

Carbon NMR

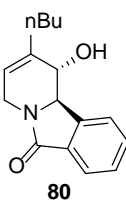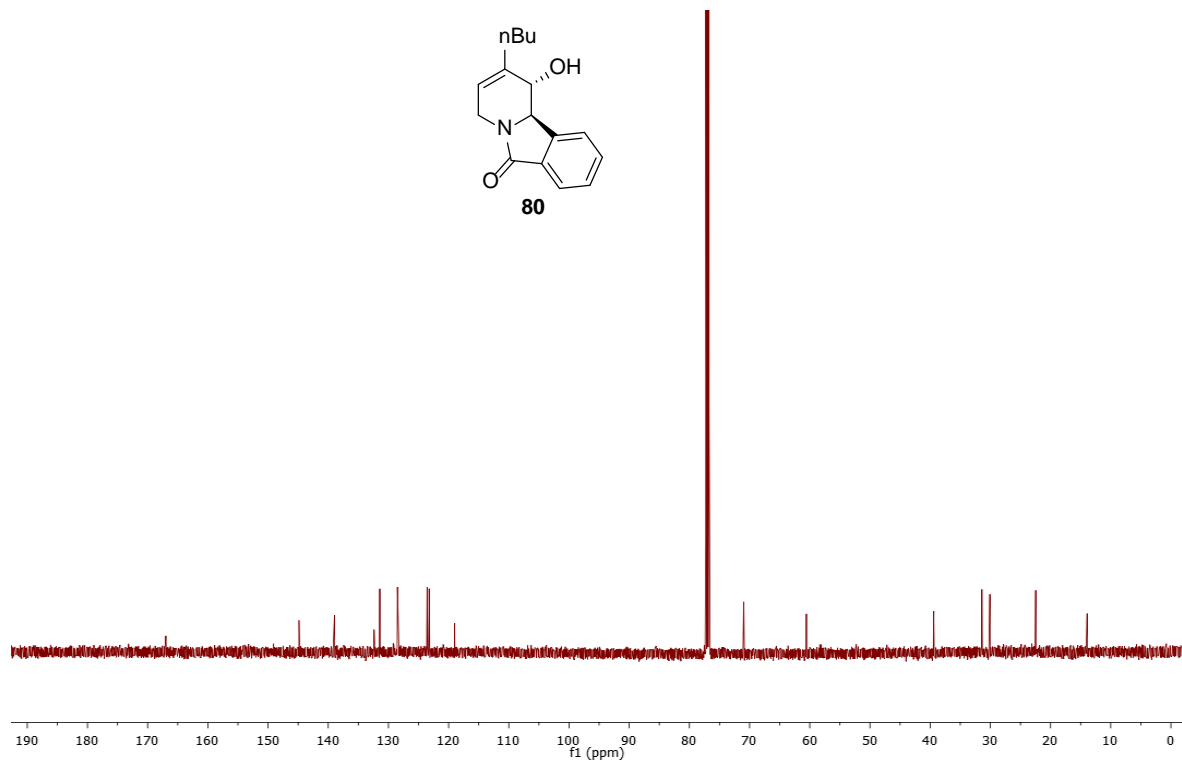

Proton NMR

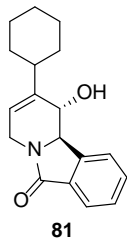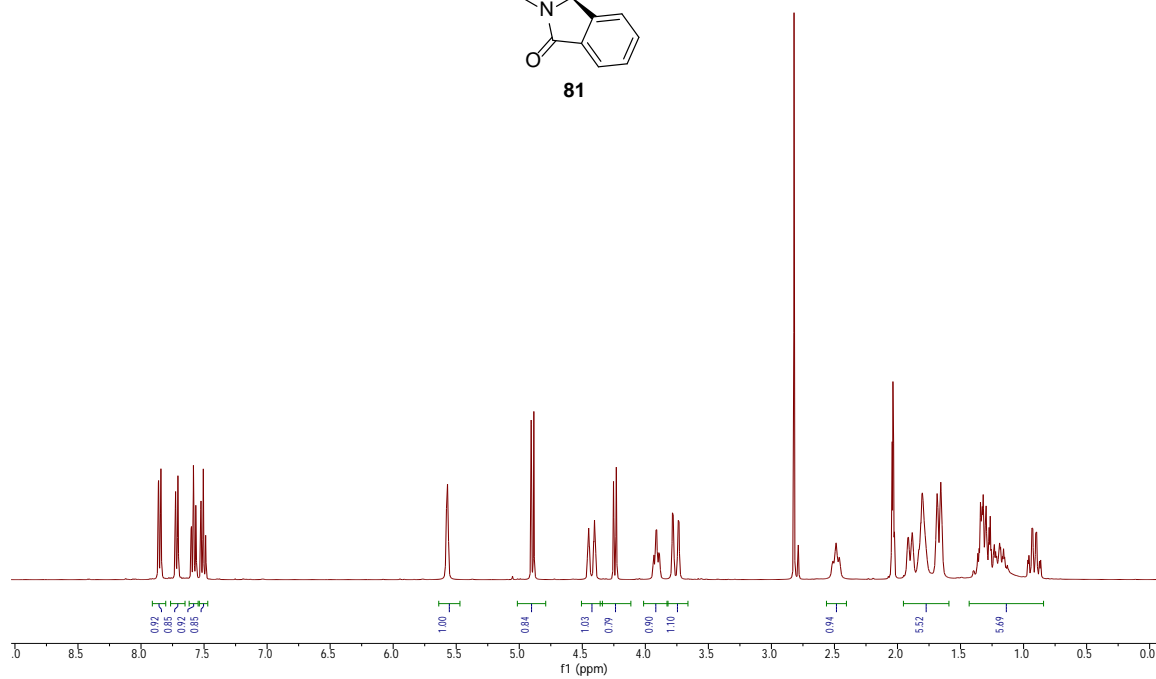

Carbon NMR

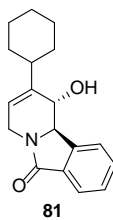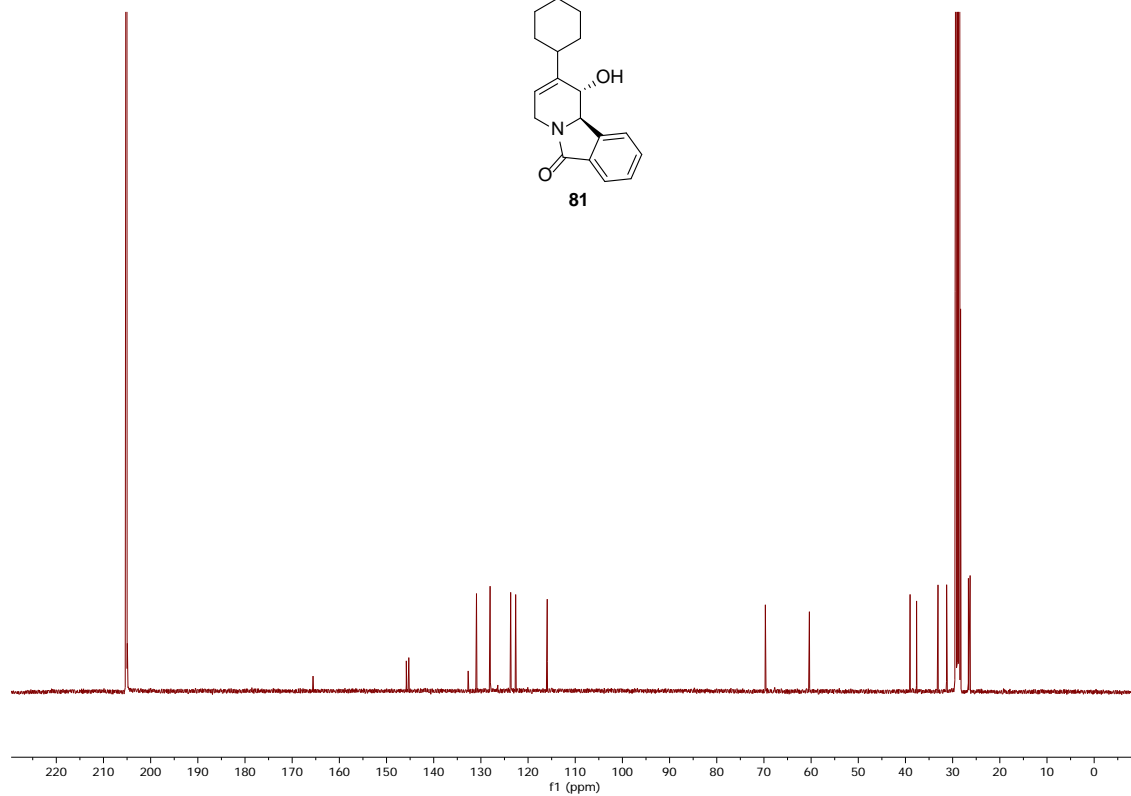

Proton NMR

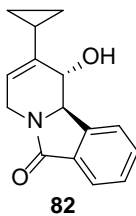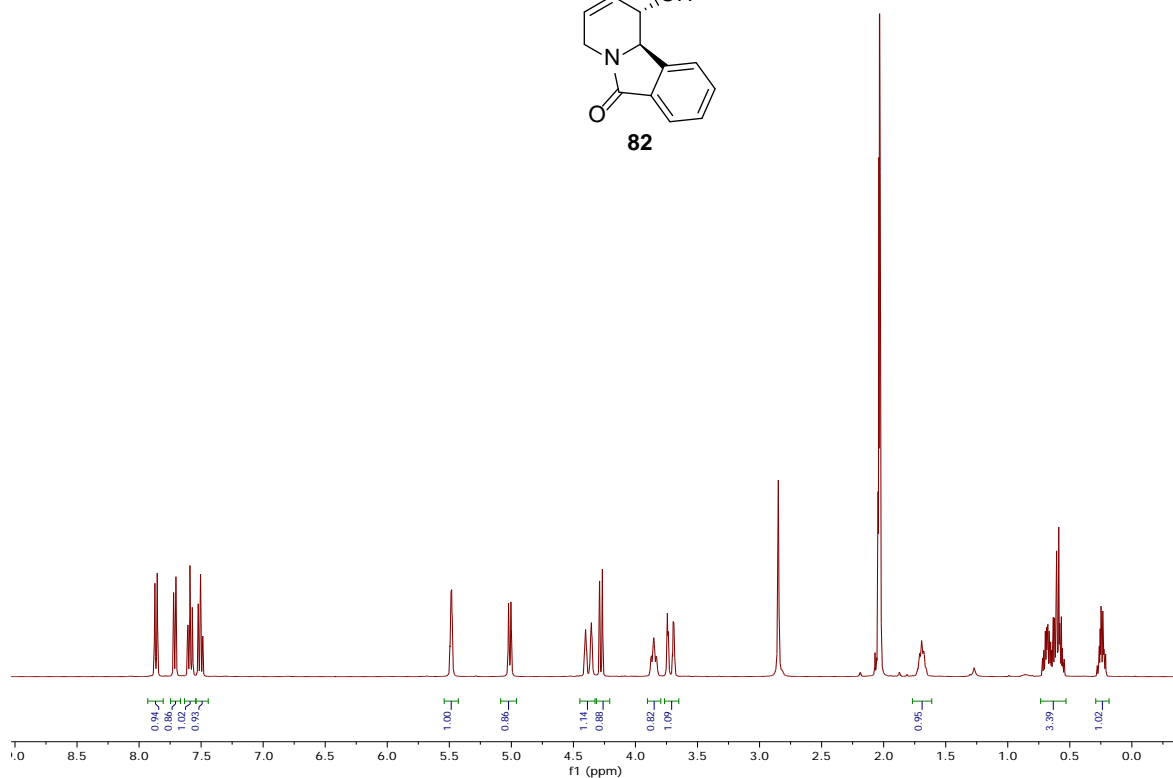

Carbon NMR

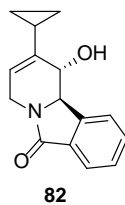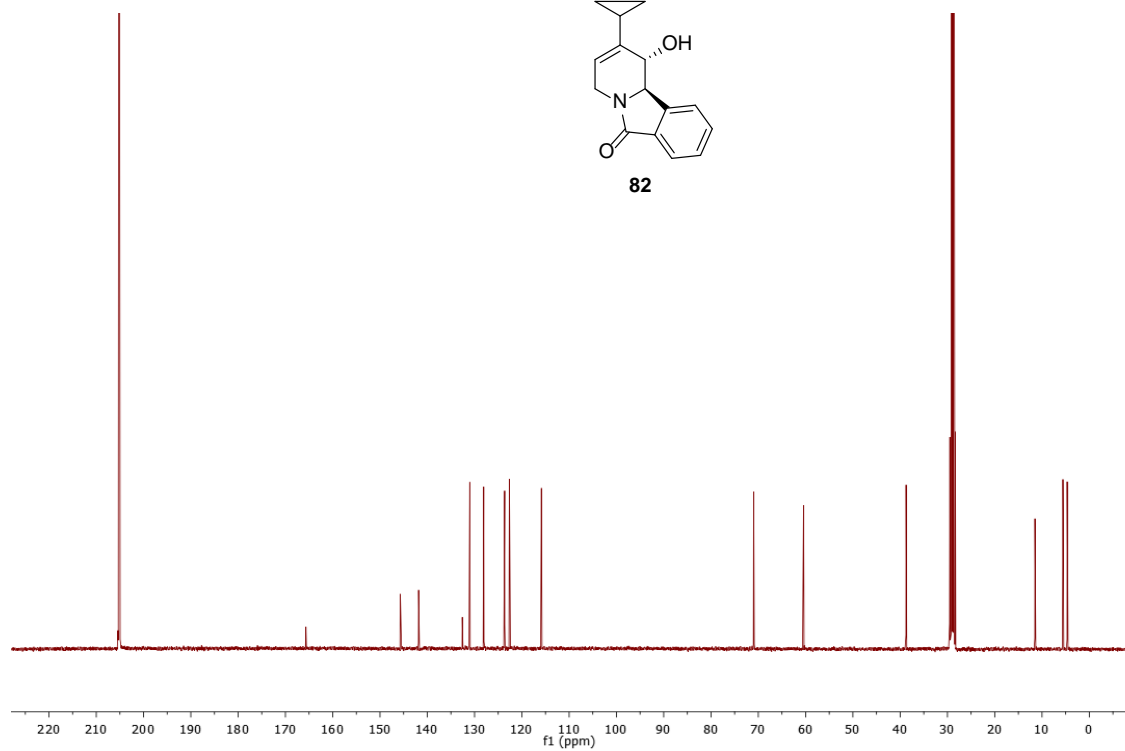



Proton NMR

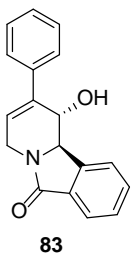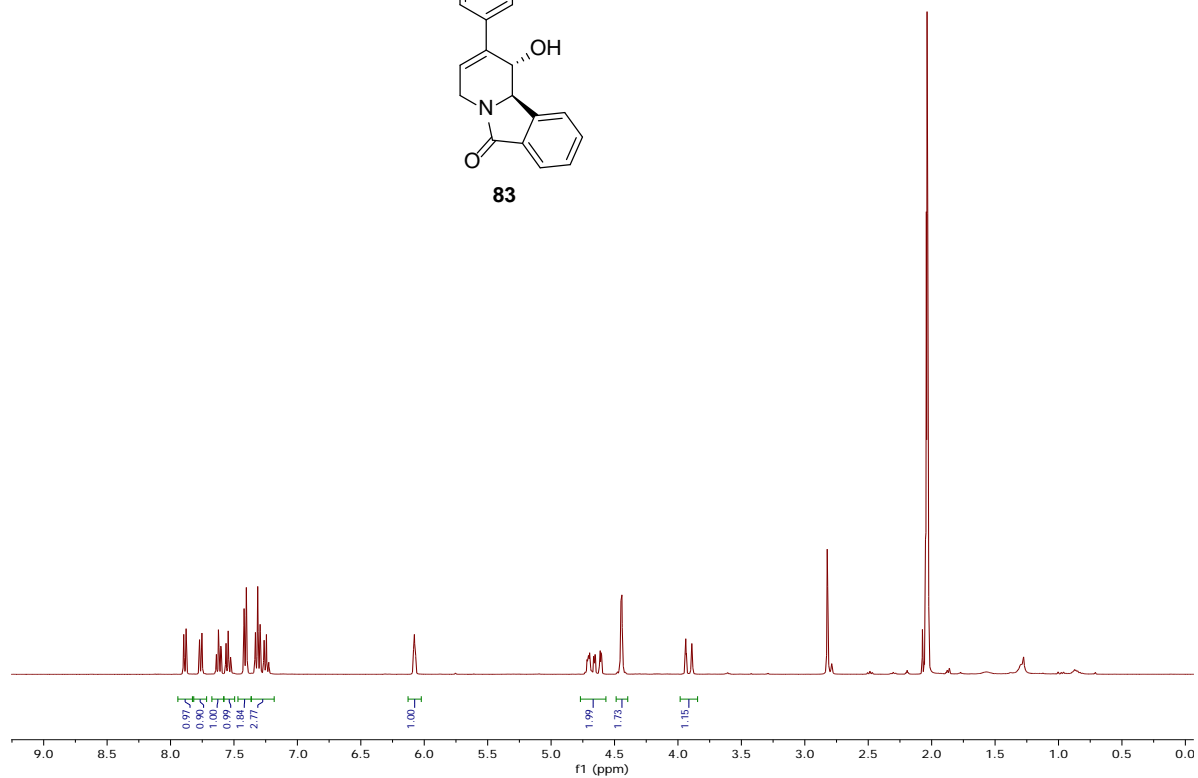

Carbon NMR

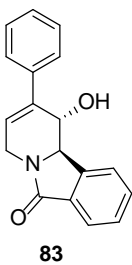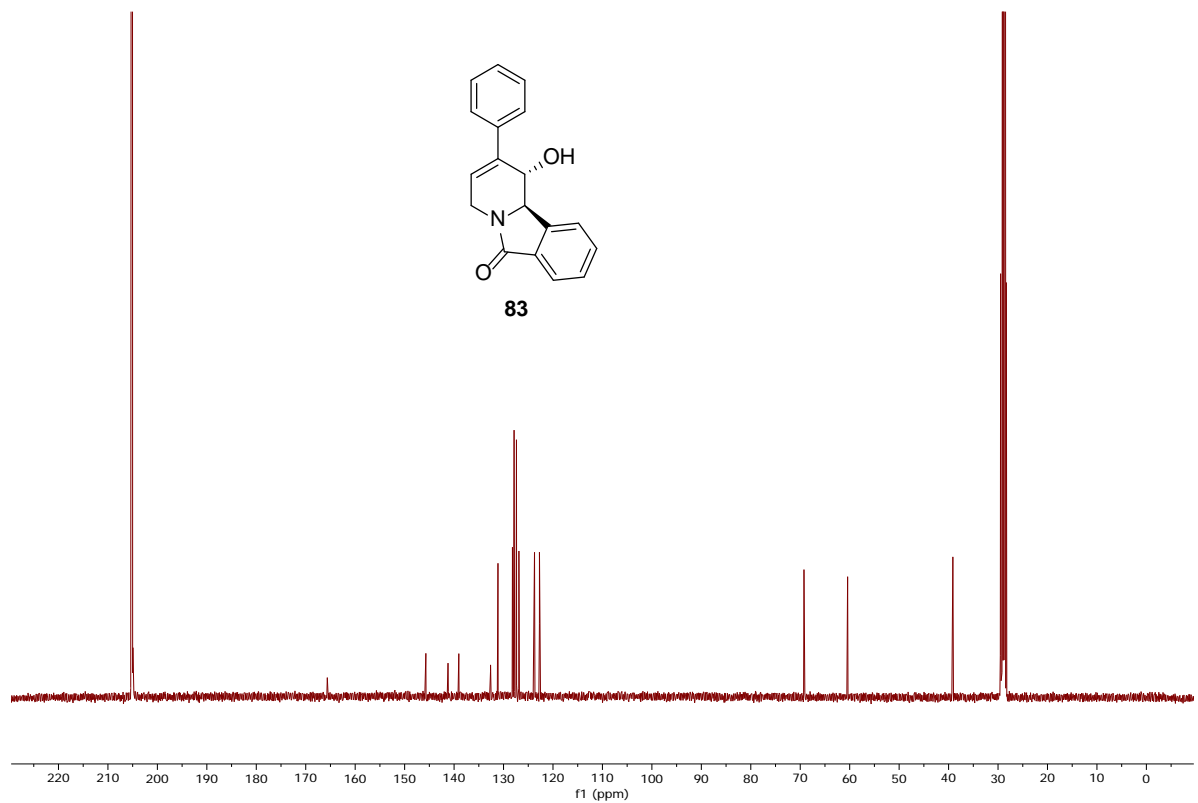

## Proton NMR

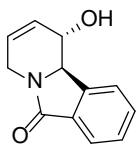

**84-anti**

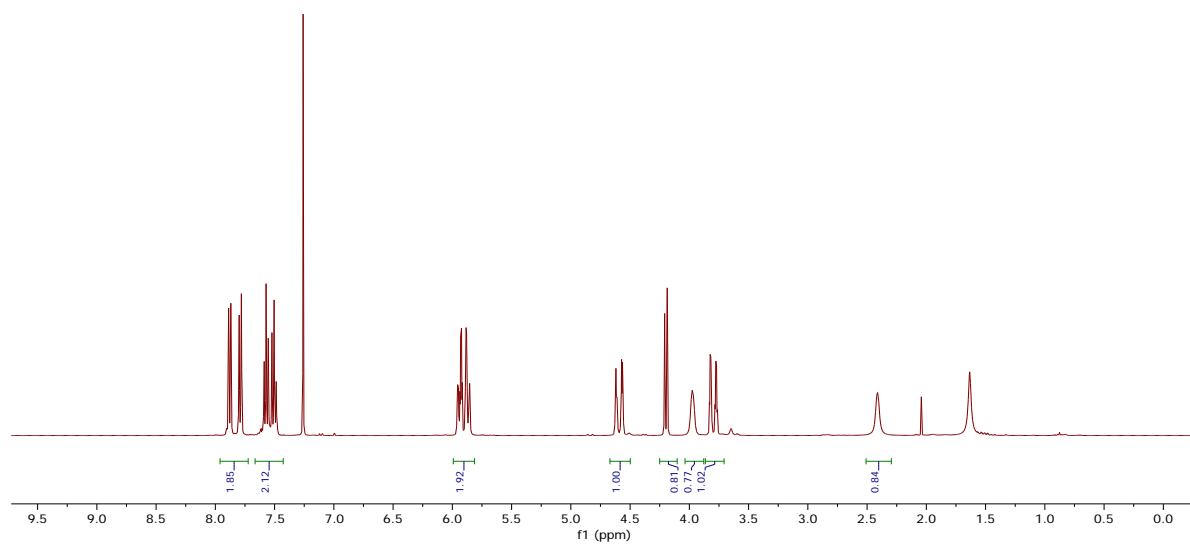

## Carbon NMR

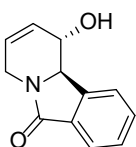

**84-anti**

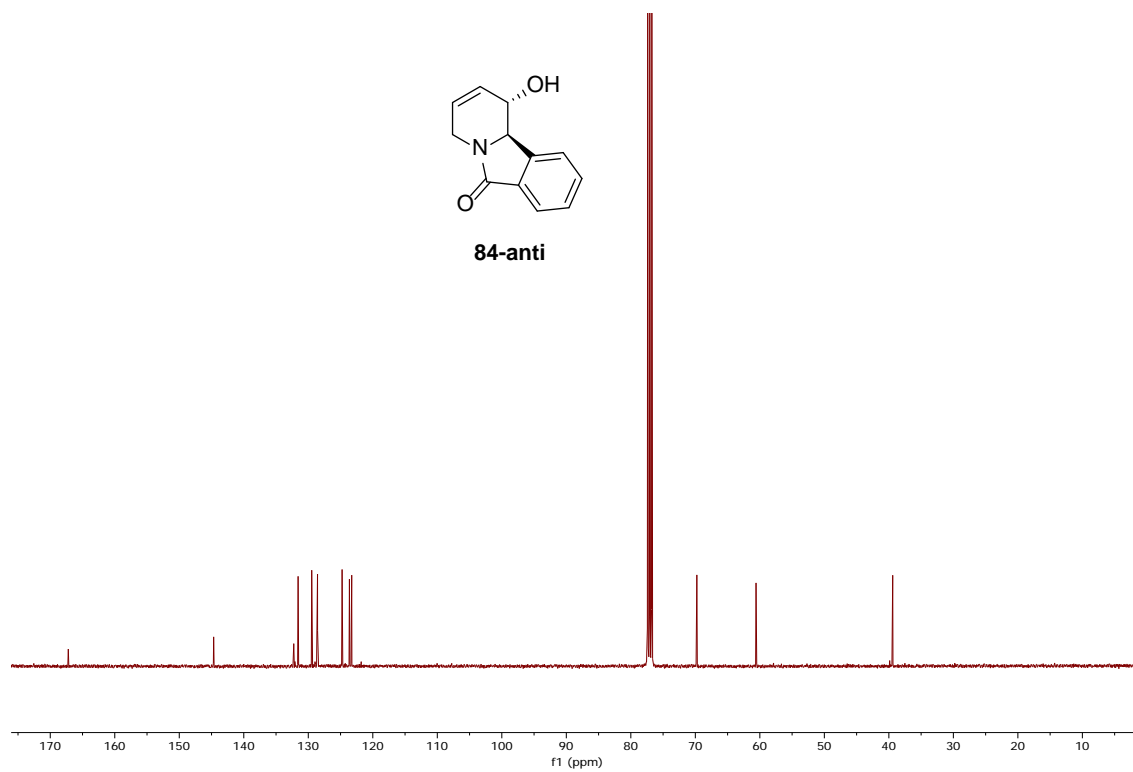

Proton NMR

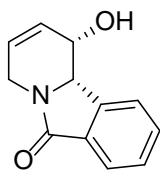

84-syn

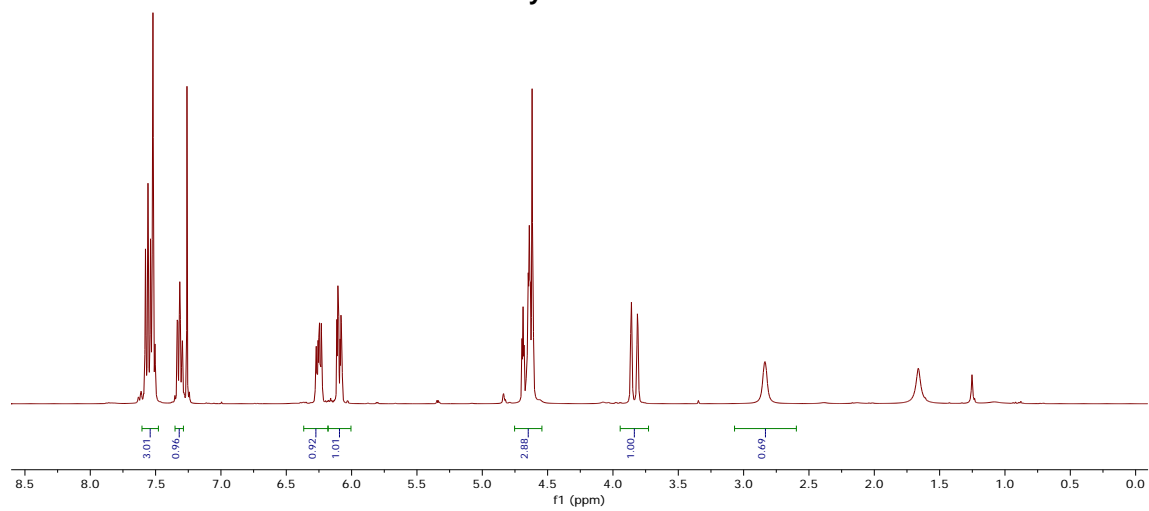

Carbon NMR

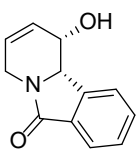

84-syn

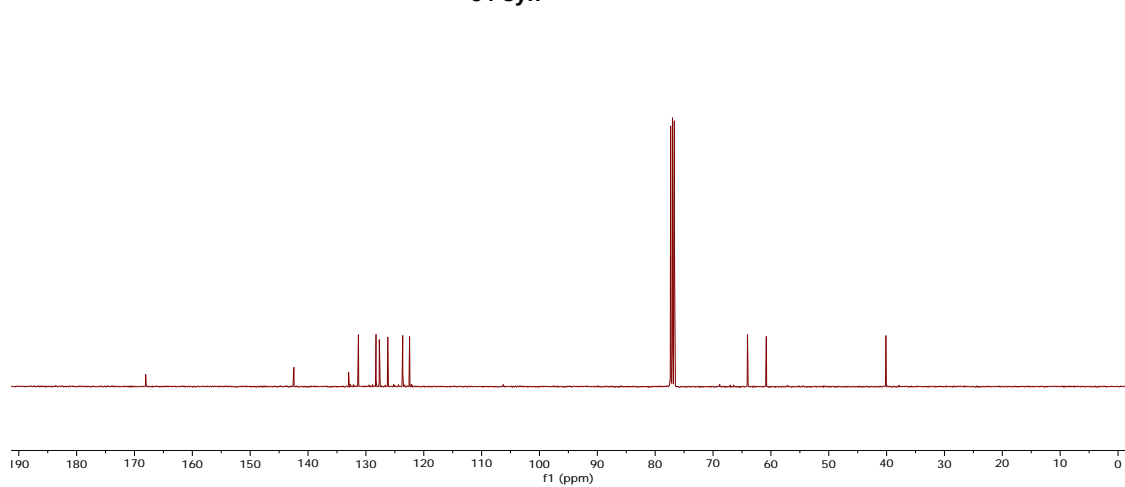

# Proton NMR

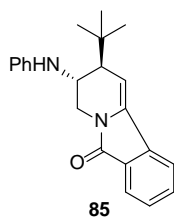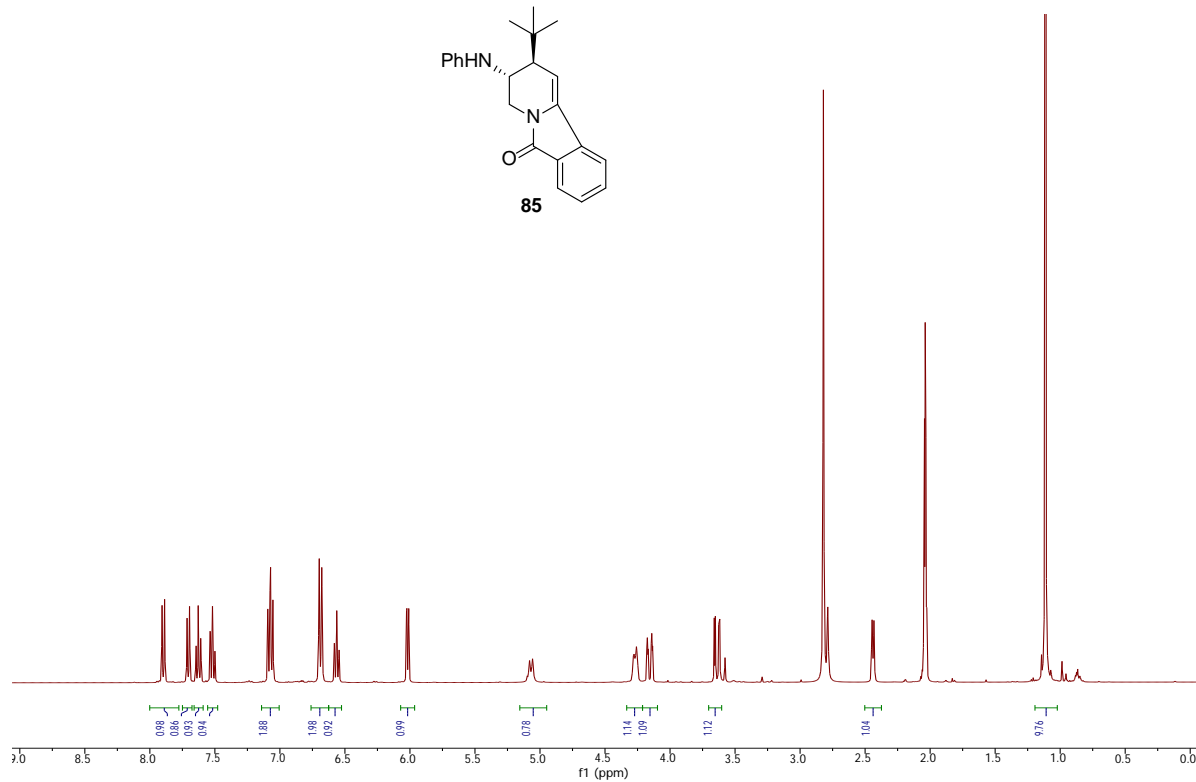

# Carbon NMR

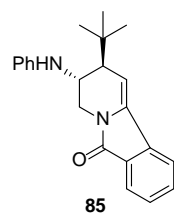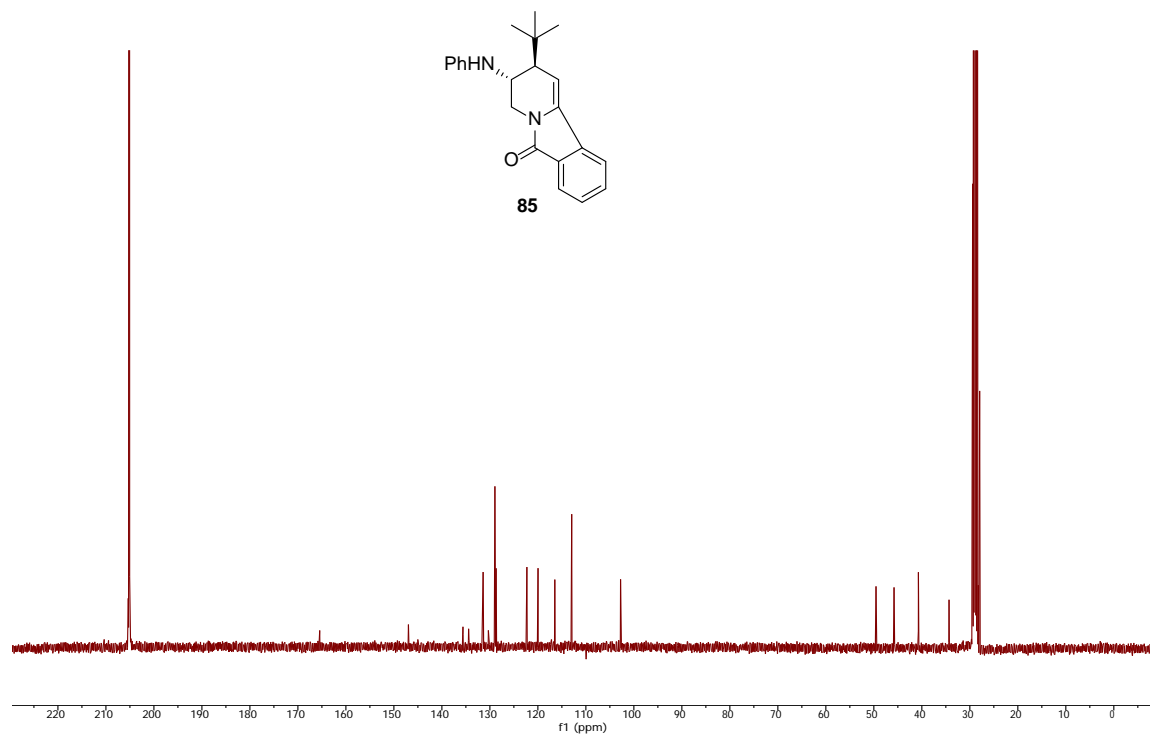

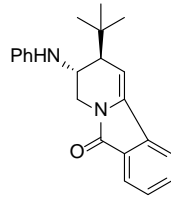

gCOSY

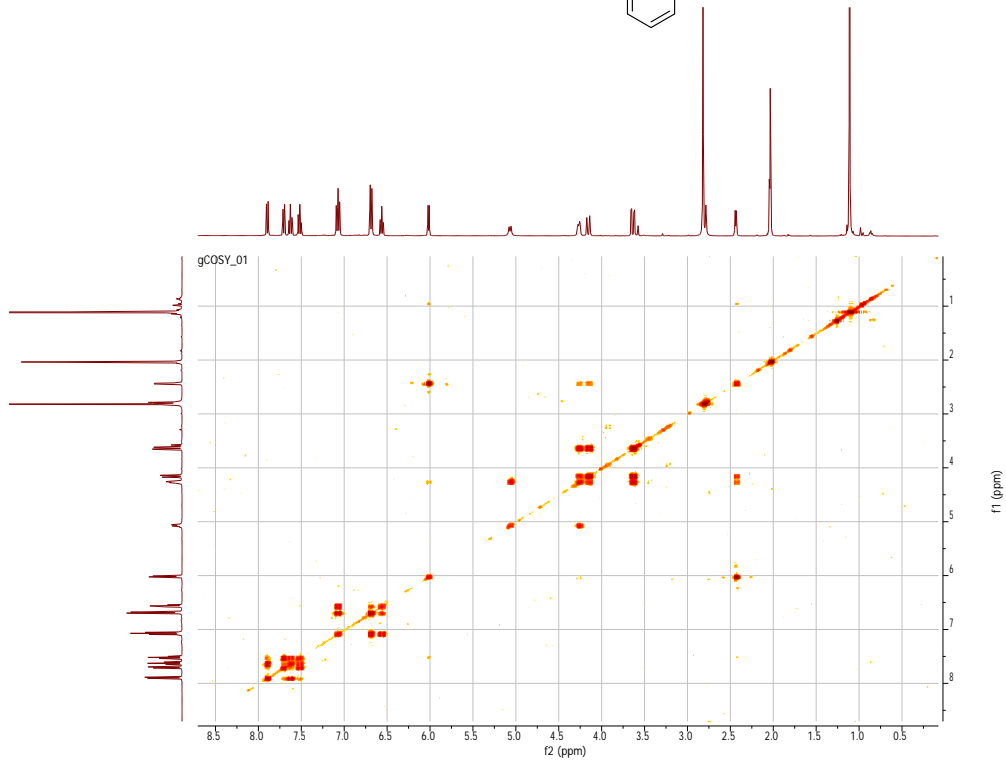

HSQC

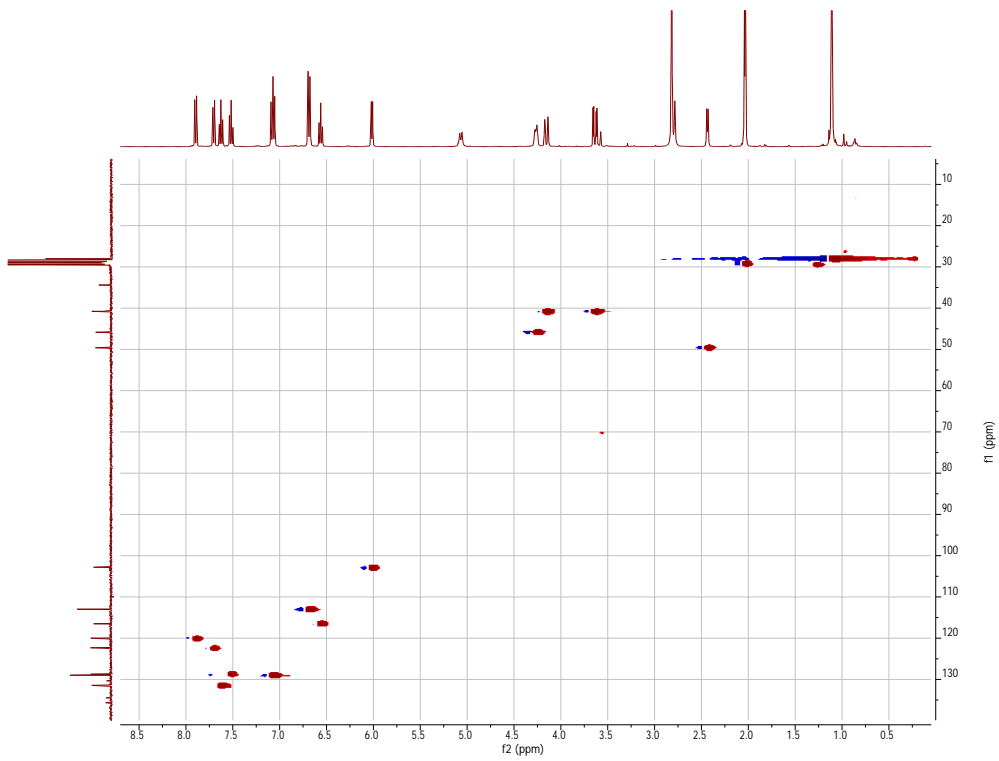

# HMBC

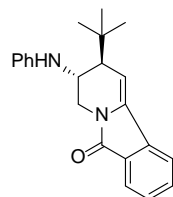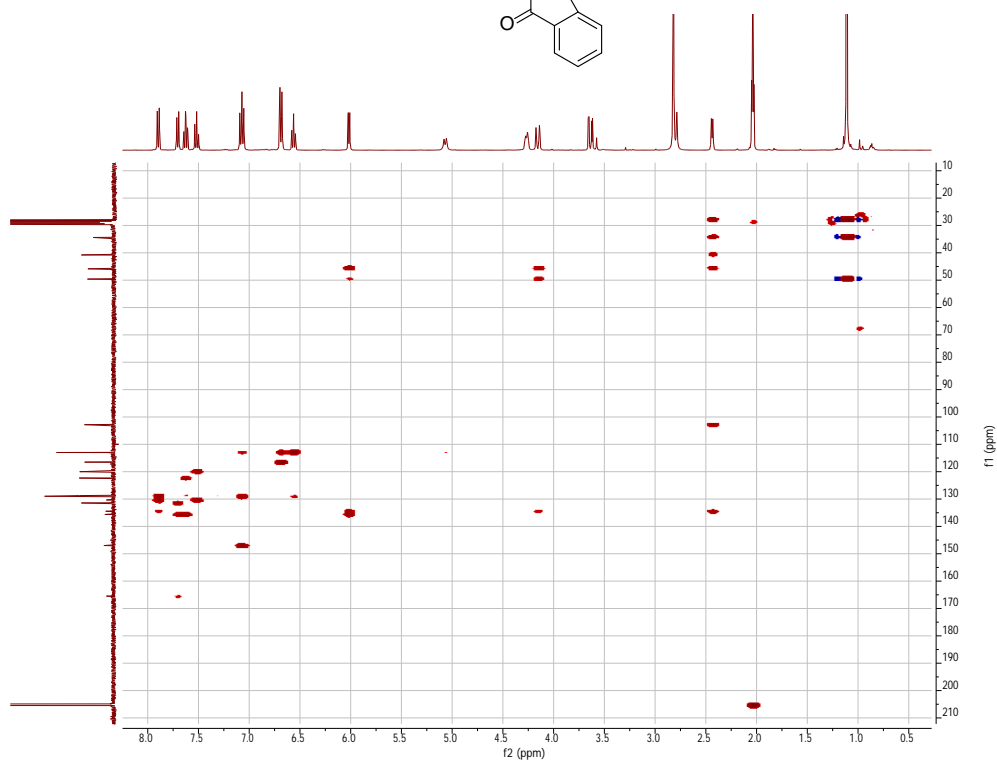

# 2D-NOESY

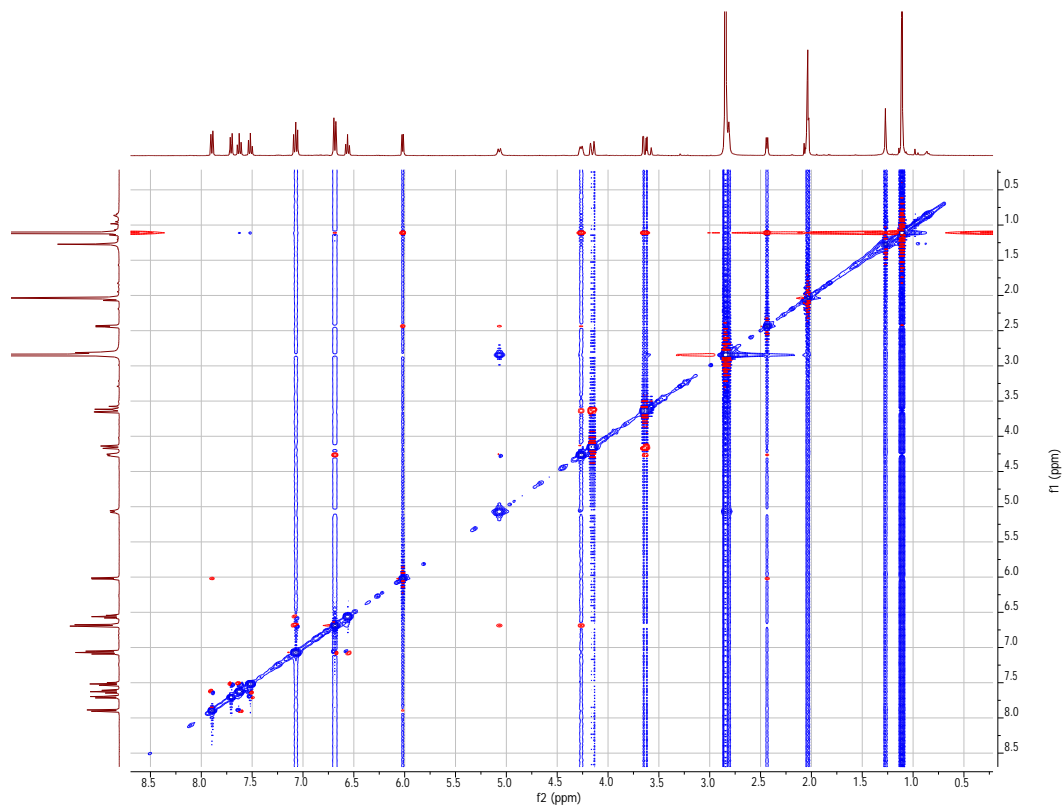

# Proton NMR

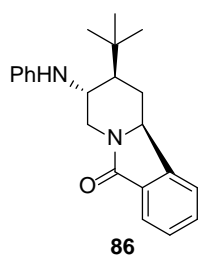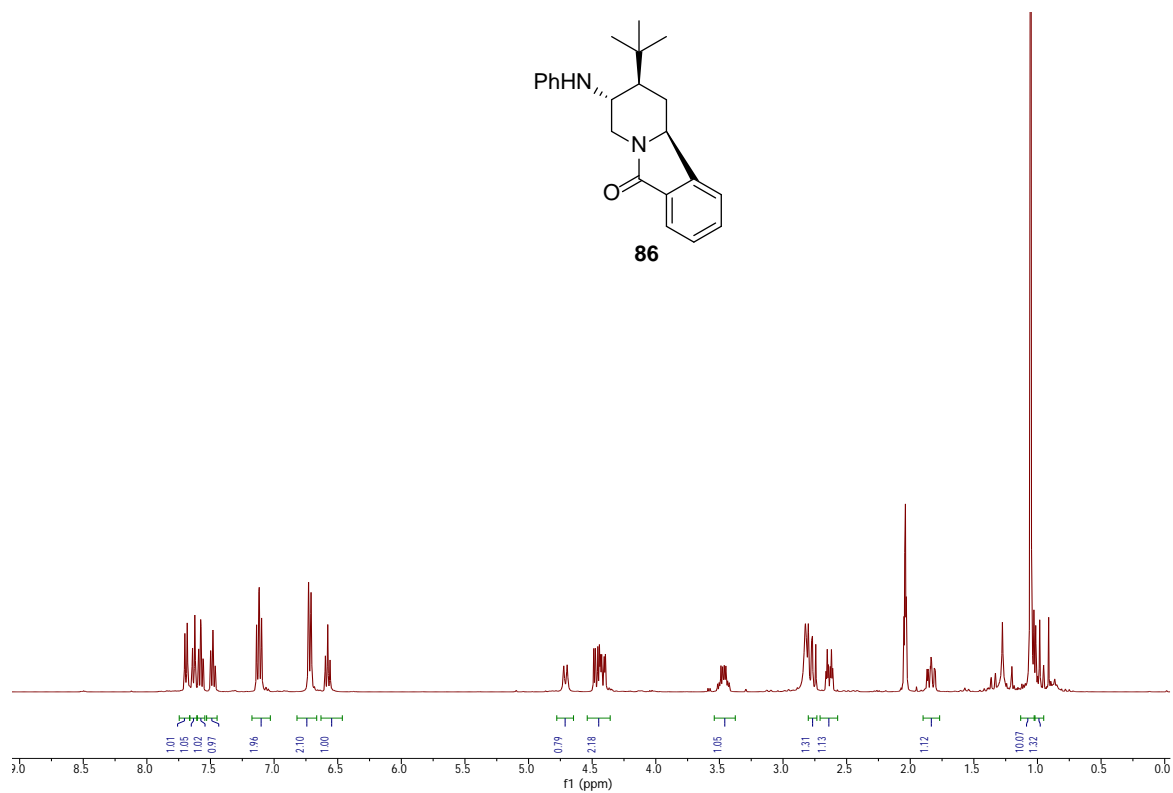

# Carbon NMR

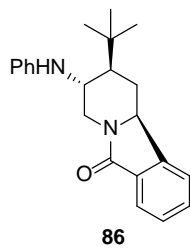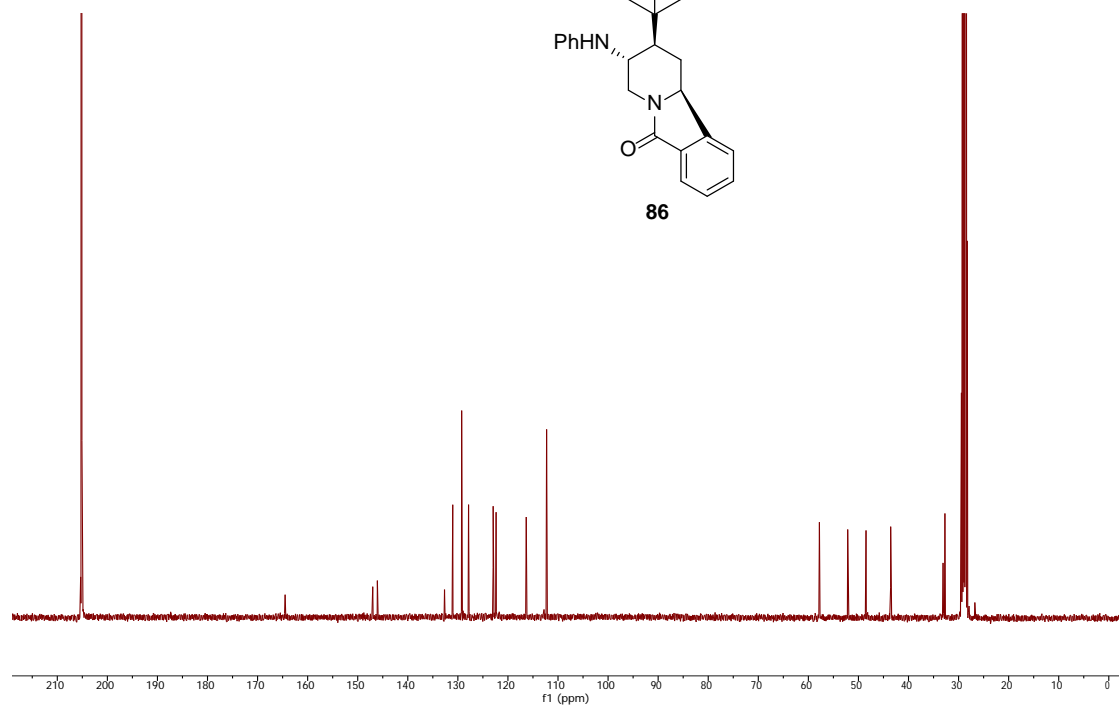

gCOSY

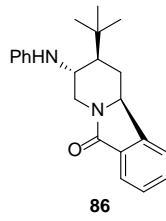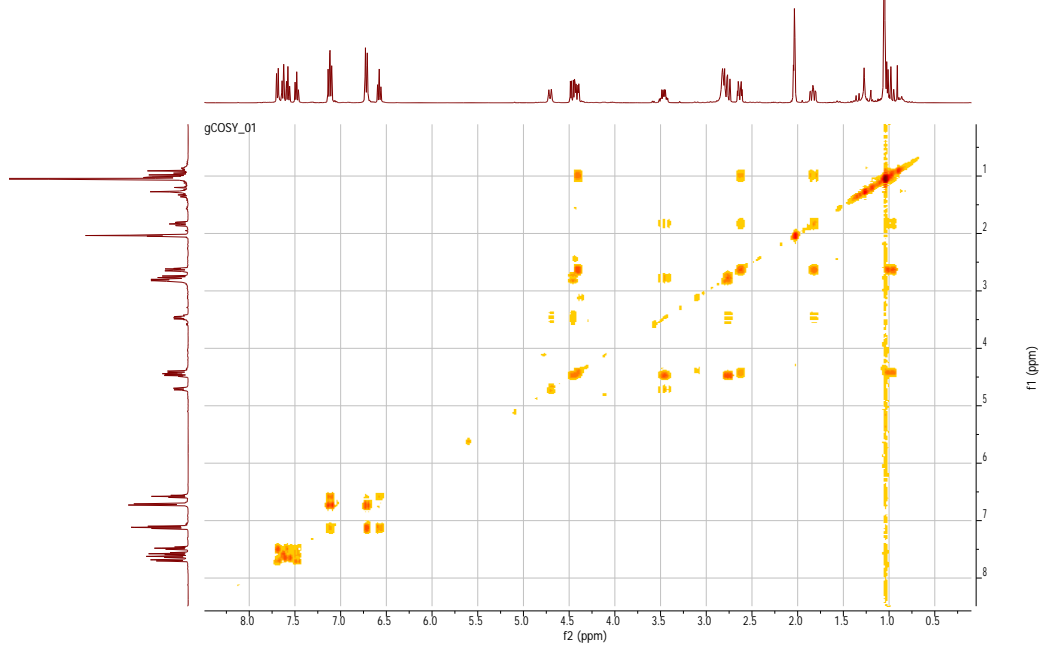

HSQC

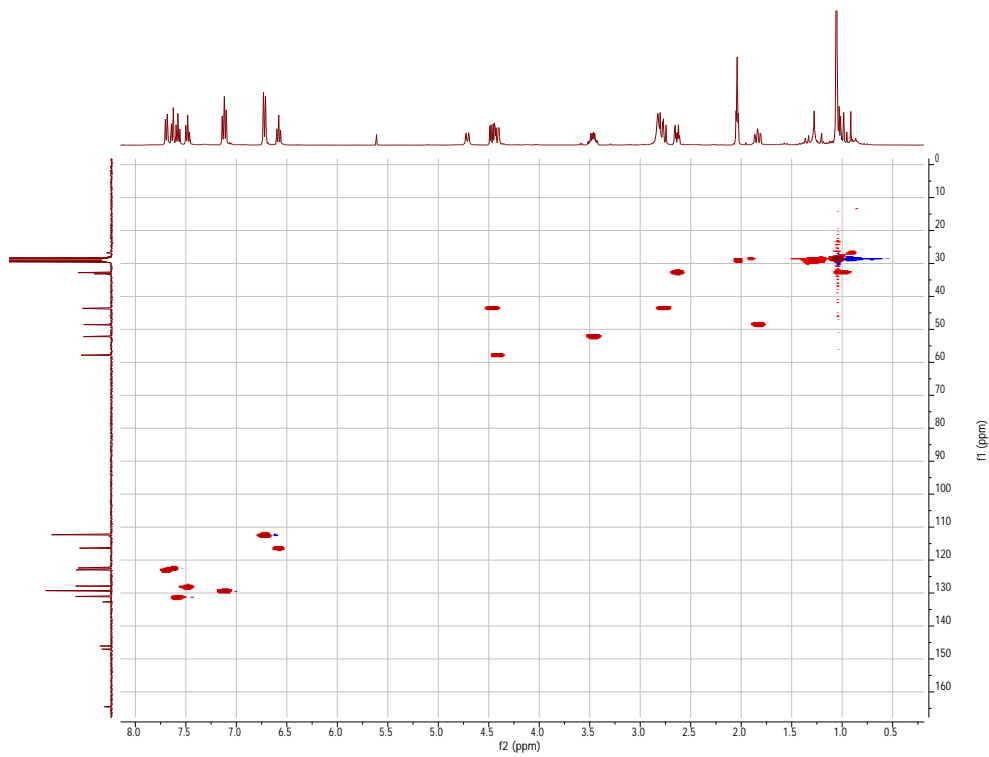



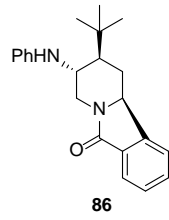

### HMBC

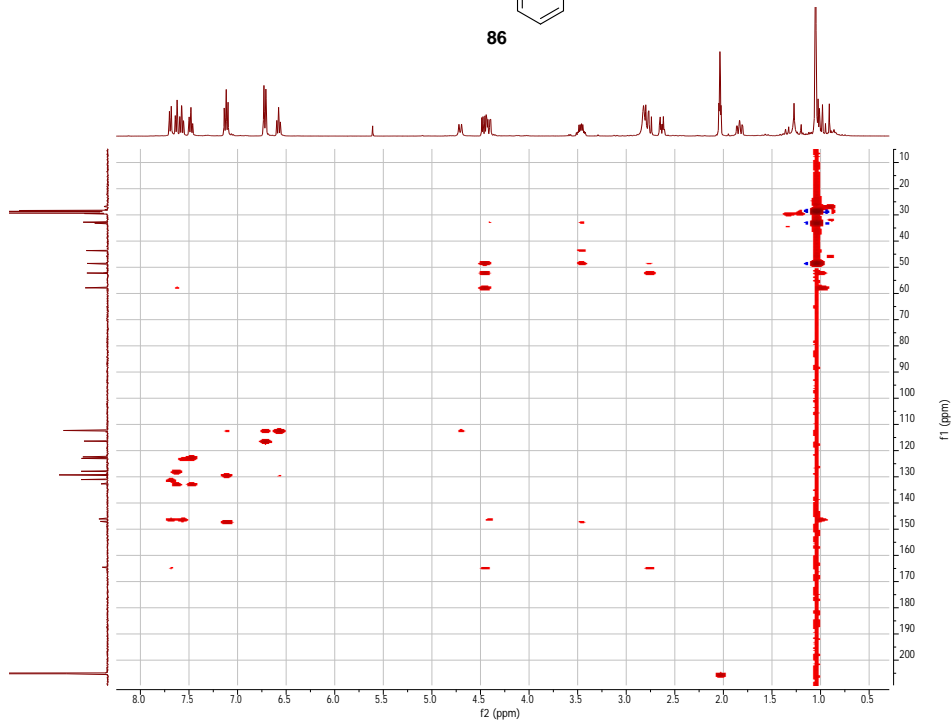

### 2D NOESY

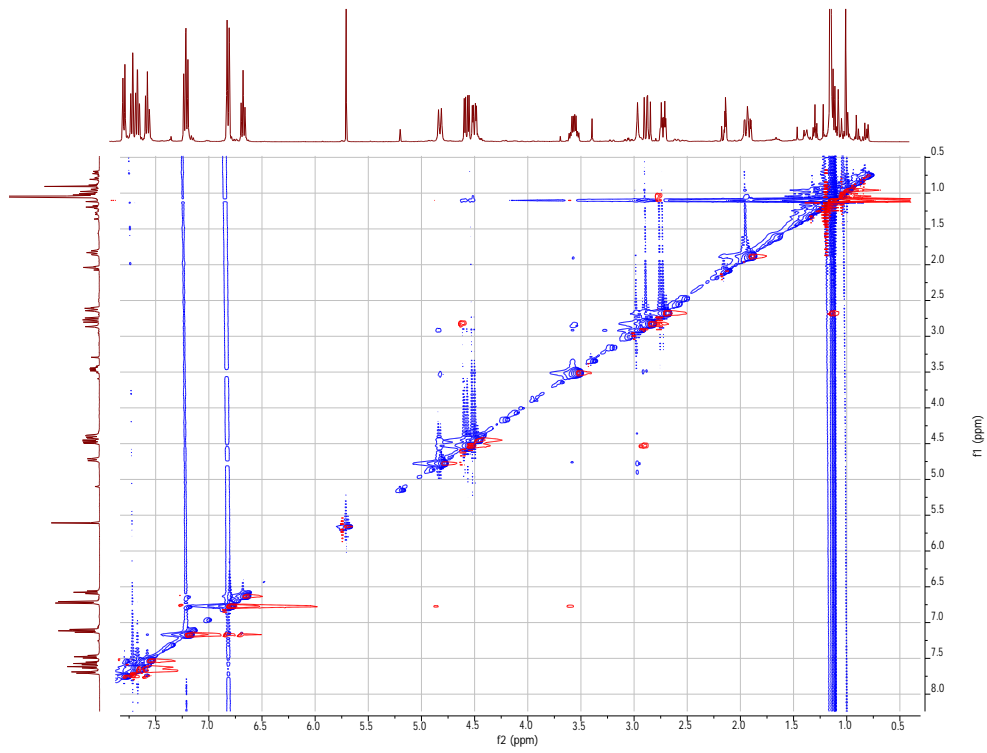

Proton NMR

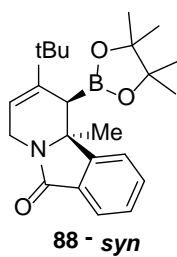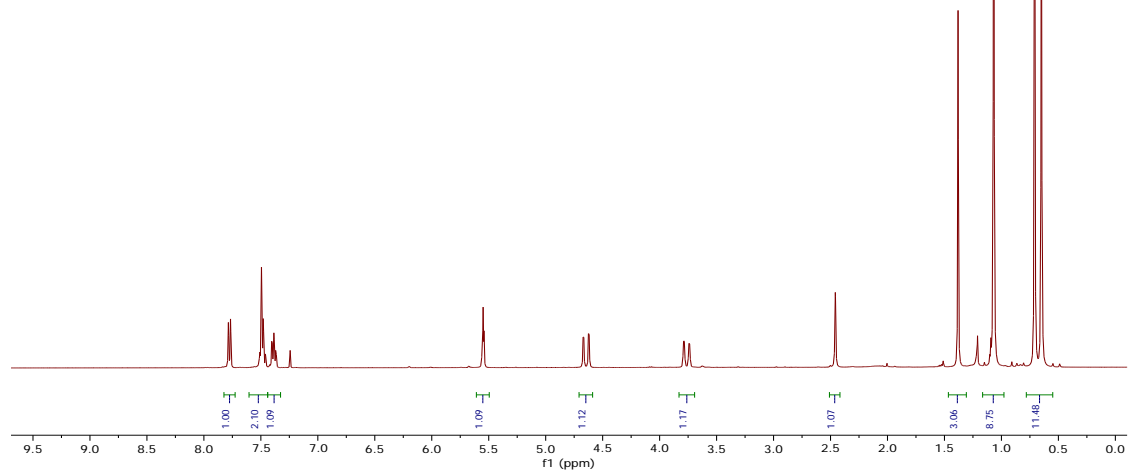

Carbon NMR

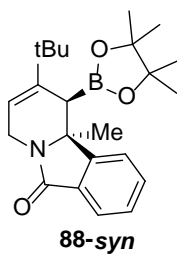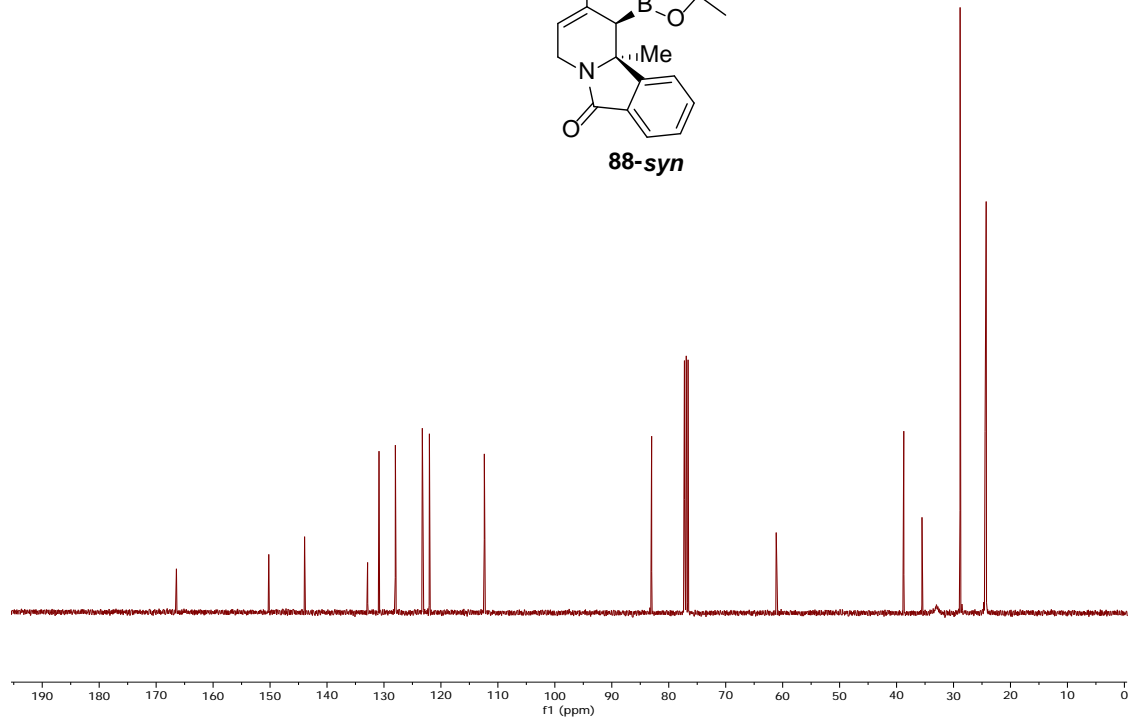

# HSQC

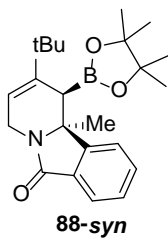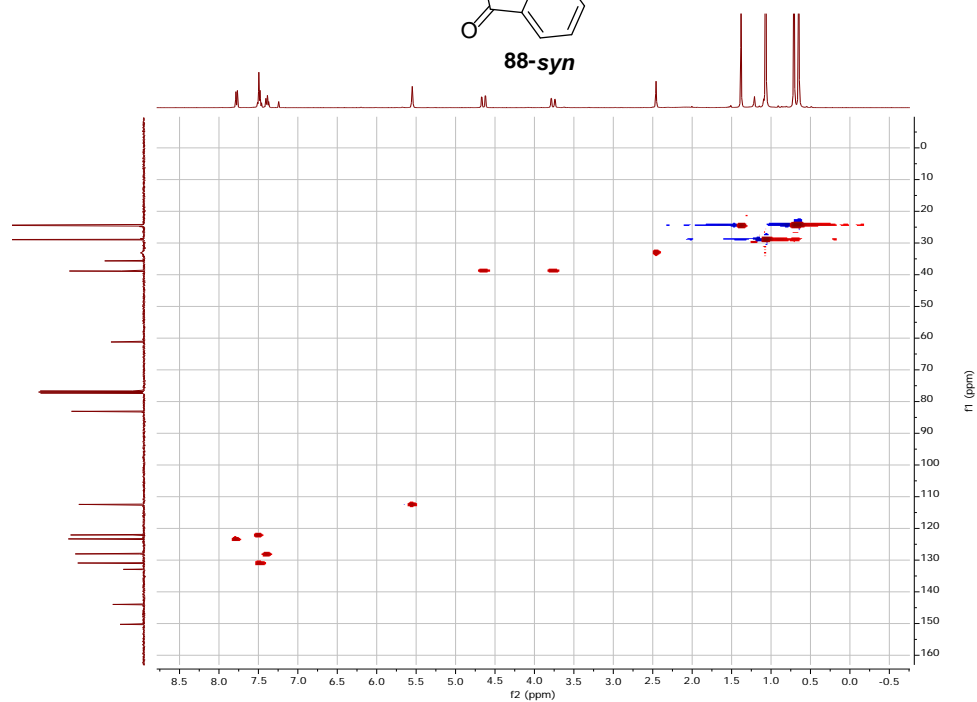

# HMBC

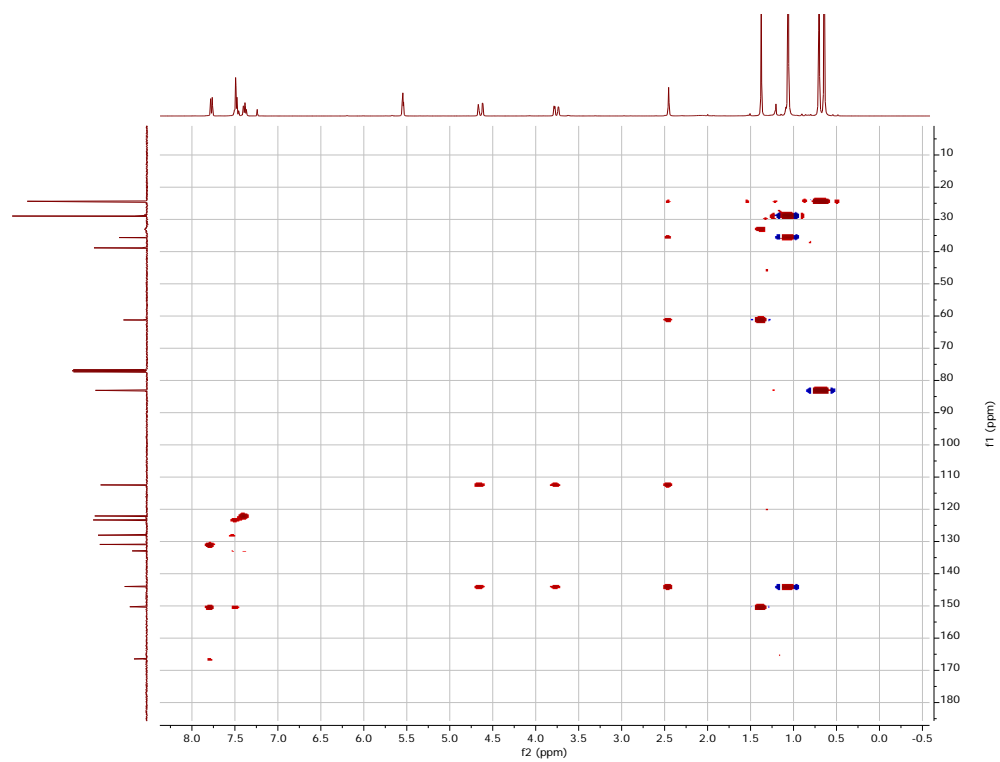

gCOSY

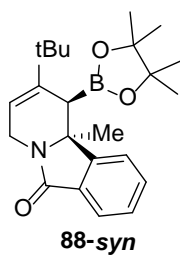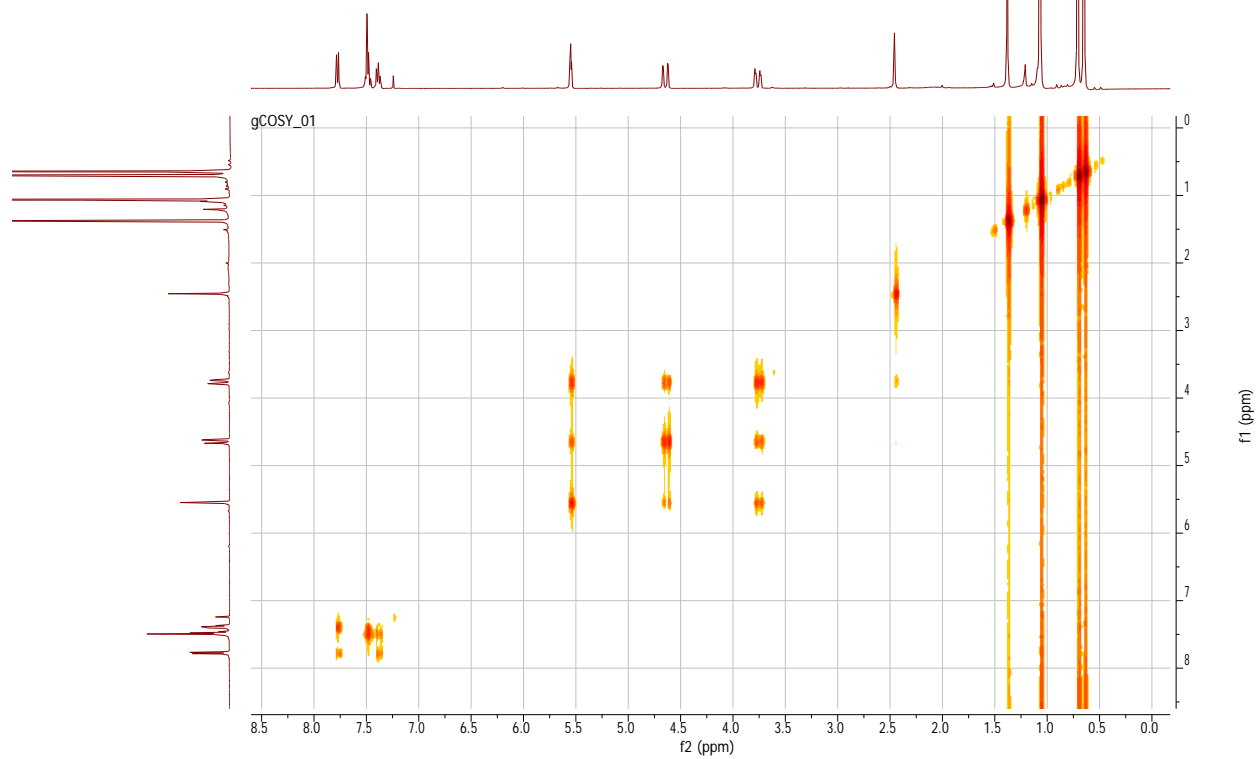

Proton NMR

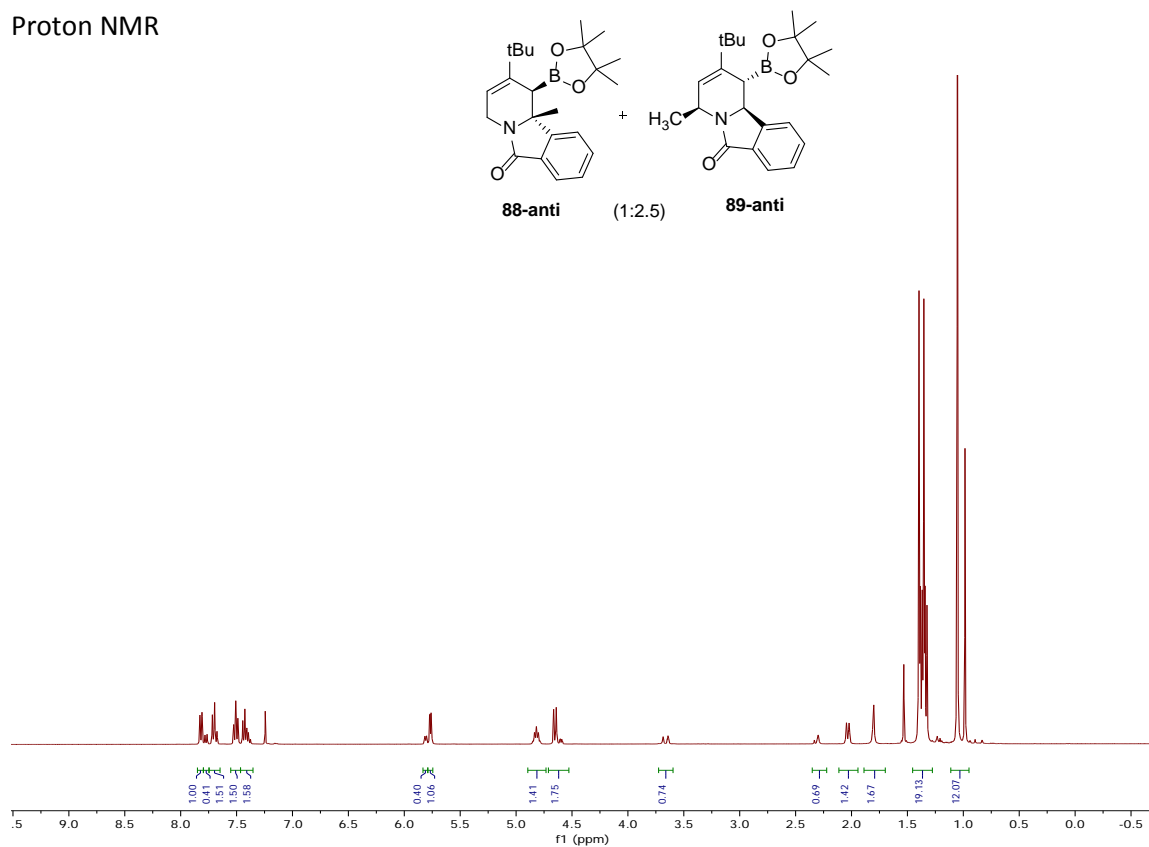

Carbon NMR

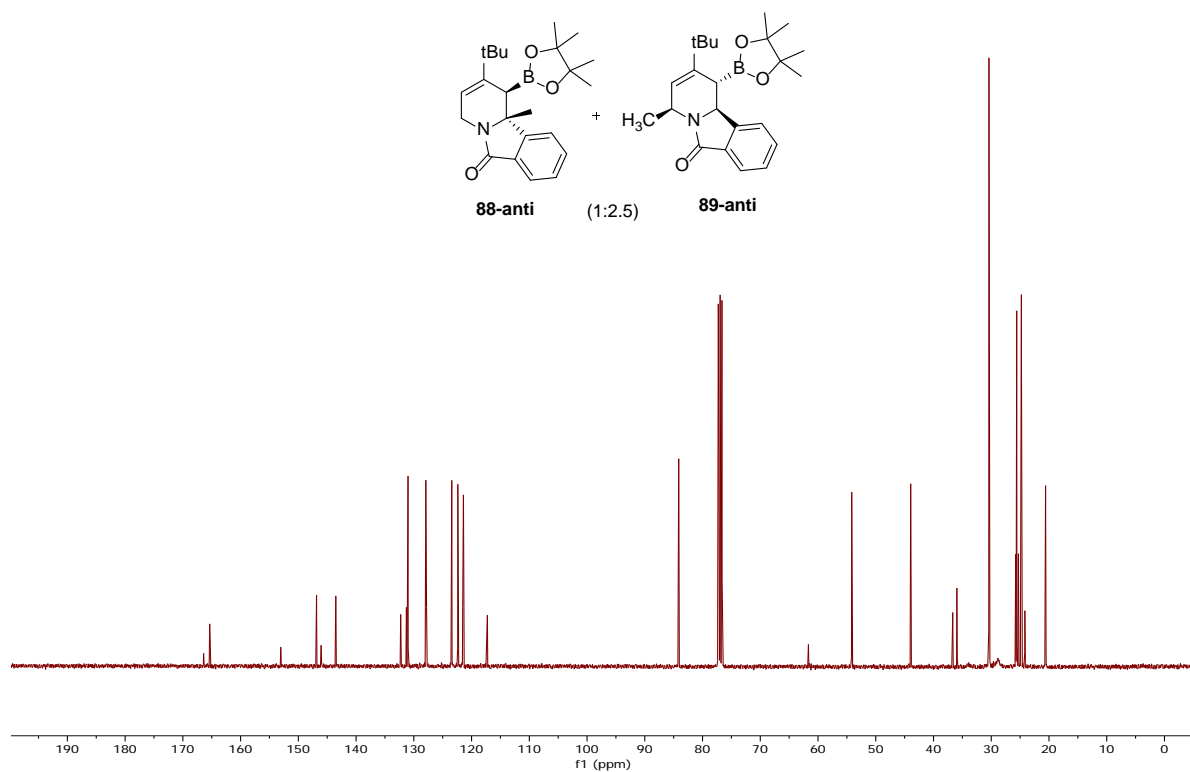

# Proton NMR

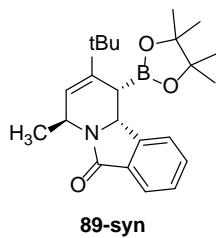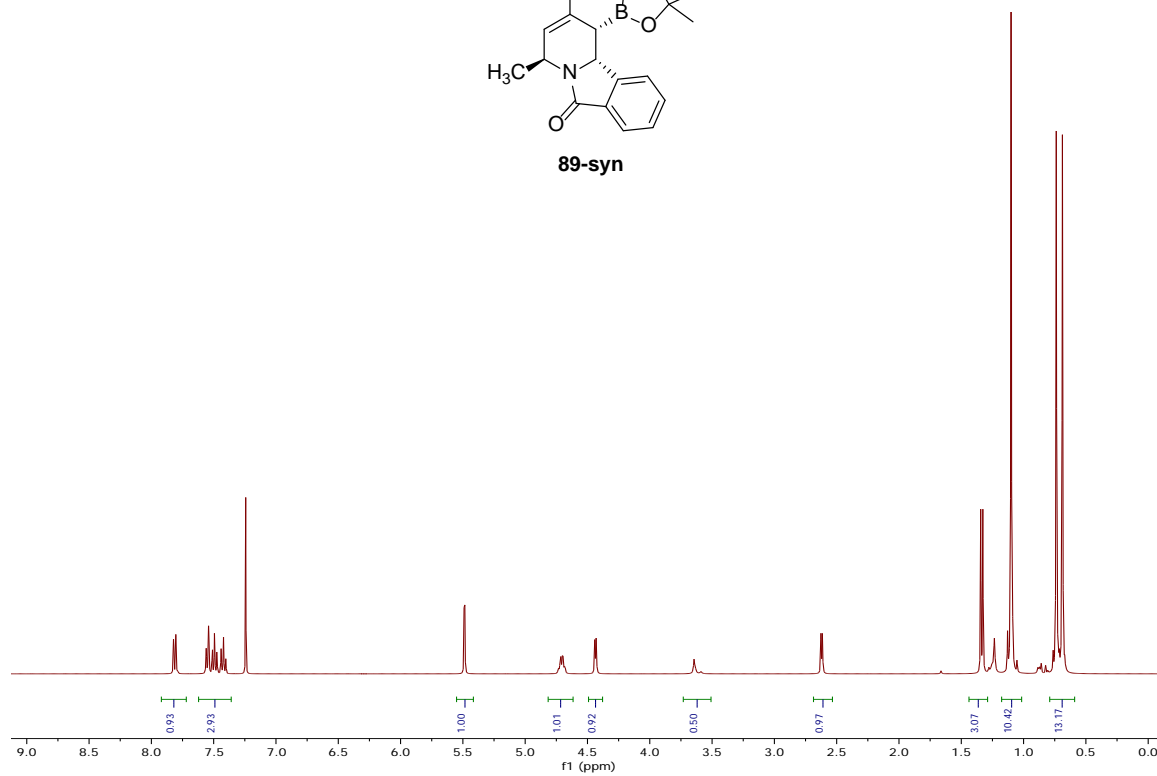

# Carbon NMR

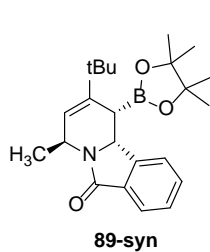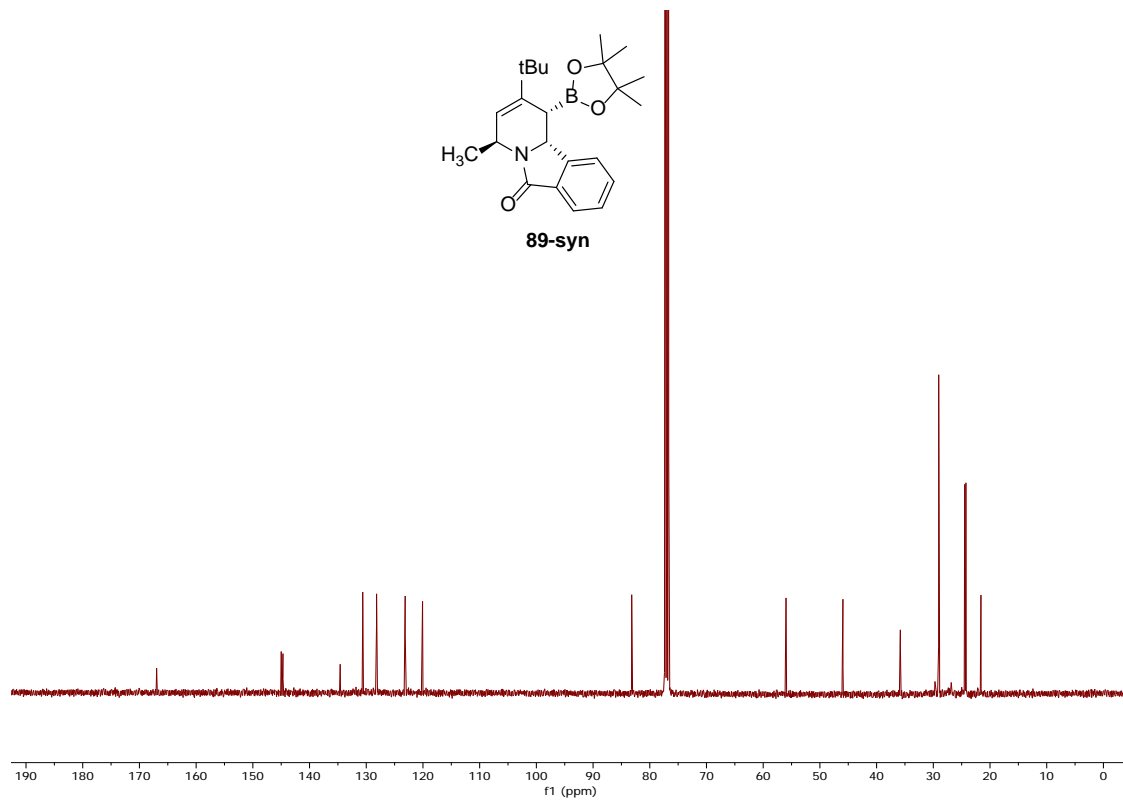

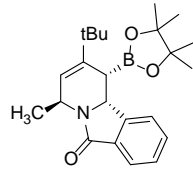

**89-syn**

HSQC

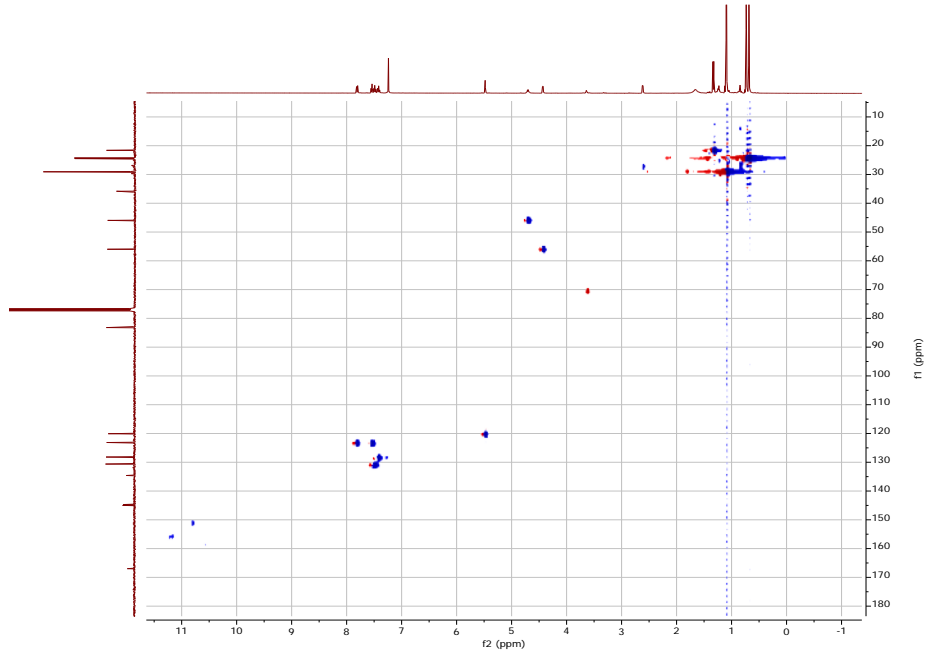

HMBC

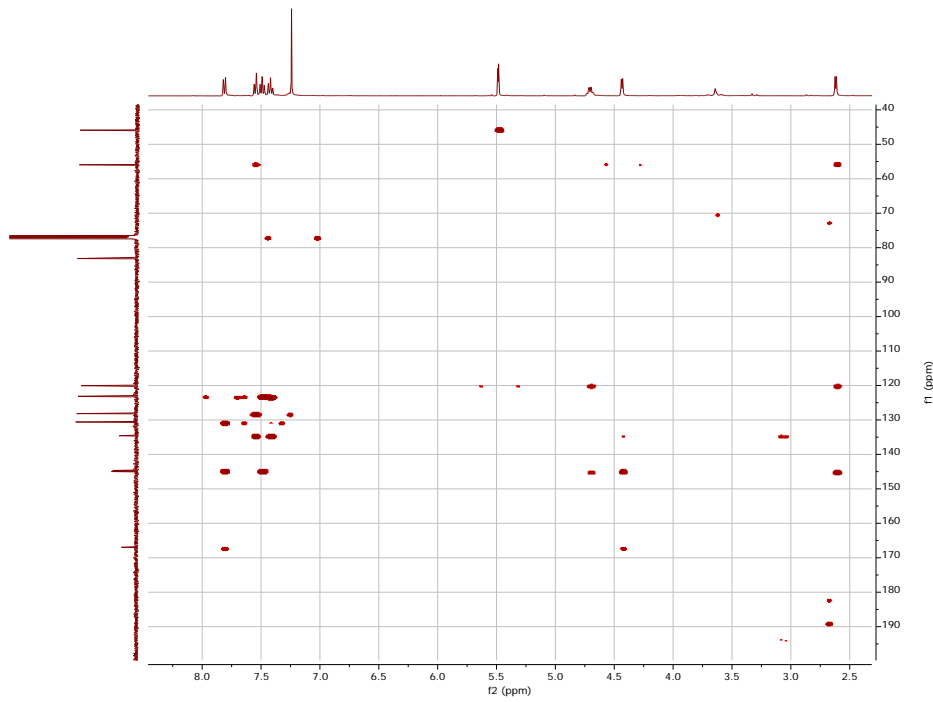

Supplement: NIHMS760830-supplement-SI.pdf [file NIHMS760830-supplement-SI.pdf]
